# Supplementary material for: Zinc finger protein Zfp335 controls early T-cell development and survival through β-selection-dependent and -independent mechanisms
Source: eLife. 2022 Feb 3;11:e75508. doi: 10.7554/eLife.75508 (PMC8871394; doi:10.7554/eLife.75508)
Supplement: Figure 1—figure supplement 1—source data 1. — Zfp335 protein expression in thymocytes. [file elife-75508-fig1-figsupp1-data1.xlsx]

## Sheet: Figure 1—figure supplement 1B
Figure 1—figure supplement 1—source data 1
Figure 1—figure supplement 1B. Zfp335 protein expression in thymocytes
		DN3	DN4	DP	CD4	CD8
	Zfp335 MFI	1093.1	759	497.1	866.9	899.9
		990.8	676.1	368.1	736.7	675.3
		1019.8	710	409.8	787	751.5
