# Supplementary material for: Zinc finger protein Zfp335 controls early T-cell development and survival through β-selection-dependent and -independent mechanisms
Source: eLife. 2022 Feb 3;11:e75508. doi: 10.7554/eLife.75508 (PMC8871394; doi:10.7554/eLife.75508)
Supplement: Figure 1—source data 1. — Figure 1E. The numbers of DN, DP, CD4, and CD8 thymocytes from WT and KO mice. Figure 1G, H. The percentages and numbers of CD4+ and CD8+ T cells in spleen from WT and KO mice. Figure 1I, J. The percentages and numbers of CD4+ and CD8+ T cells in lymph nodes from WT and KO mice. [file elife-75508-fig1-data1.xlsx]

## Sheet: Figure 1D
Figure 1—source data 1
Figure 1D. The percentages of DN, DP, CD4, CD8 thymocytes from WT and KO mice
		WT	KO
	% DN cells	9.15	70.15
		5.36	98.42
		3.02	93.57
		9.28	67.96
	% DP cells	67.85	0.15
		72.42	0.54
		67.91	2.4
		68.07	0.39
	% CD4+ T cells	6.68	0.12
		5.59	0.58
		4.97	0.33
		5.7	0.46
	% CD8+ T cells	0.78	0.08
		1.14	0.11
		0.64	0.11
		0.84	0.13

## Sheet: Figure 1E
Figure 1—source data 1
Figure 1E. The numbers of DN, DP, CD4, CD8 thymocytes from WT and KO mice
		WT	KO
	DN cells (x 106)	3.95655	0.891919
		4.18332	2.15359
		2.40153	1.31375
		3.20609	0.598762
	DP cells (x 106)	34.5576	0.286492
		64.3534	0.0197451
		69.5848	0.0503874
		27.0736	0.209996
	CD4+ T cells (x 106)	2.54547	0.024902
		4.98014	0.004388
		4.76336	0.01076
		2.84557	0.010294
	CD8+ T cells (x 106)	1.304	0.00324
		1.474	0.00312
		1.728	0.002
		1.68	0.0048

## Sheet: Figure 1G, H
Figure 1—source data 1
Figure 1G, H. The percentages and numbers of CD4+ and CD8+ T cells in spleen from WT and KO mice
	Spleen	WT	KO
	% CD4+ T cells	24.7	5.43
		27.99	4.21
		23.14	2.81
		27.09	2.22
	CD4+ T cells (x 106)	15.005	1.4684
		16.01	1.9753
		9.8883	0.3152
		20.567	0.6017
	% CD8+ T cells	5.6	1.85
		5.39	1.38
		4.25	0.48
		6.43	0.7
	CD8+ T cells (x 106)	3.3953	0.5018
		3.0871	0.6484
		1.813	0.0546
		4.885	0.1872

## Sheet: Figure 1I, J
Figure 1—source data 1
Figure 1I, J. The percentages and numbers of CD4+ and CD8+ T cells in lymph nodes from WT and KO mice
	LN	WT	KO
	% CD4+ T cells	71.62	3.59
		70.46	1.58
		67.25	3.55
		62.58	3.62
	CD4+ T cells (x 106)	13.3261	0.999385
		10.9209	0.072665
		3.99888	0.364363
		6.52138	2.20163
	% CD8+ T cells	10.15	2.23
		10.84	0.98
		11.15	1.6
		9.19	1.18
	CD8+ T cells (x 106)	1.88861	0.622993
		1.67843	0.044717
		0.662596	0.164084
		0.957605	0.719763
