# Supplementary material for: Zinc finger protein Zfp335 controls early T-cell development and survival through β-selection-dependent and -independent mechanisms
Source: eLife. 2022 Feb 3;11:e75508. doi: 10.7554/eLife.75508 (PMC8871394; doi:10.7554/eLife.75508)
Supplement: Figure 2—figure supplement 1—source data 1. — Figure 2—figure supplement 1B. The numbers of DN, DP, CD4+, and CD8+ thymocytes 2 and 4 days post coculture in vitro. Figure 2—figure supplement 1C. The numbers of DN, DP, CD4+, and CD8+ thymocytes in chimeric mice separately transferred with WT and KO bone marrow cells. Figure 2—figure supplement 1D. The numbers of DN, DP, CD4+, and CD8+ thymocytes in chimeric mice cotransferred with WT and KO bone marrow cells. [file elife-75508-fig2-figsupp1-data1.xlsx]

## Sheet: Figure 2—figure supplement 1A
Figure 2—figure supplement 1—source data 1
Figure 2—figure supplement 1A. The numbers of DN, DP, CD4+ and CD8+ thymocytes 2 and 4 days post separate culture in vitro
	Day 2	WT	KO	Day 4	WT	KO
Separate culture	DN cells (x 102)	62.284	54.0566	DN cells (x 102)	177.38	34.5131
		57.4856	49.8407		205.798	31.6095
		65.4838	56.9384		192.659	29.7352
	DP cells (x 102)	2.66995	1.26325	DP cells (x 102)	35.7404	0.296091
		2.35496	0.986057		40.2547	0.309897
		2.805	1.2504		39.4492	0.244039
	CD4+ T cells (x 102)	1.1667	1.38607	CD4 cells (x 102)	33.3724	0.444137
		0.949014	0.717133		32.9089	0.382814
		1.29151	0.815477		33.486	0.356672
	CD8+ T cells (x 102)	8.48103	2.29842	CD8 cells (x 102)	22.7439	0.536665
		7.8733	2.38447		27.5025	0.455731
		8.51591	3.18942		27.236	0.544395

## Sheet: Figure 2—figure supplement 1B
Figure 2—figure supplement 1—source data 1
Figure 2—figure supplement 1B. The numbers of DN, DP, CD4+ and CD8+ thymocytes 2 and 4 days post co-culture in vitro
	Day 2	WT	KO	WT/(WT+KO)	KO/(WT+KO)	Day 4	WT	KO	WT/(WT+KO)	KO/(WT+KO)	% in each well		WT	KO
Co-culture	DN cells (x 102)	9.91131	22.1525	0.309112	0.690888	DN cells (x 102)	11.156	13.9976	0.443515	0.556485		Day 0	20	80
		10.858	23.0602	0.320123	0.679877		16.1048	18.7278	0.462348	0.537652	DN	Day 2	32	68
		10.5199	22.0478	0.323016	0.676984		13.7913	16.8355	0.450303	0.549697		Day 4	45	55
Average	DN_average			0.317417	0.682583	DN_average			0.452055	0.547945
Sticatical data											DP	Day 2	73	27
	DP cells (x 102)	1.43569	0.617096	0.699387	0.300613	DP cells (x 102)	2.18383	0.0789337	0.965116	0.0348837		Day 4	97	2
		1.94453	0.652525	0.748744	0.251256		5.75373	0.169227	0.971429	0.0285714
		1.53792	0.542794	0.73913	0.26087		4.79123	0.105884	0.978378	0.0216216	CD4	Day 2	68	32
	DP_average			0.729087	0.270913	DP_average			0.971641	0.0283589		Day 4	93	7
	CD4+ T cells (x 102)	1.07047	0.491158	0.685484	0.314516	CD4+ T cells (x 102)	2.42063	0.236801	0.910891	0.0891089	CD8	Day 2	57	43
		1.51386	0.665576	0.694611	0.305389		5.6127	0.394864	0.934272	0.0657277		Day 4	71	29
		1.26652	0.63326	0.666667	0.333333		4.28829	0.211767	0.952941	0.0470588
	CD4_average			0.682254	0.317746	CD4_average			0.932702	0.0672985
	CD8+ T cells (x 102)	1.612	1.33494	0.547009	0.452991	CD8+ T cells (x 102)	1.36818	0.710403	0.658228	0.341772
		1.67046	1.16149	0.589862	0.410138		1.8615	0.676909	0.733333	0.266667
		1.48622	1.15021	0.563725	0.436275		1.85296	0.688243	0.729167	0.270833
	CD8_average			0.566865	0.433135	CD8_average			0.706909	0.293091

## Sheet: Figure 2—figure supplement 1C
Figure 2—figure supplement 1—source data 1
Figure 2—figure supplement 1C. The numbers of DN, DP, CD4+ and CD8+ thymocytes in chimeric mice separately transferred with WT and KO bone marrow cells.
		WT	KO
Separate transfer	DN cells (x 104)	74.6289	6.26206
		120.574	10.2908
		43.4403	6.37837
		31.5739	19.8072
	DP cells (x 105)	382.32	0.007084
		588.685	0.014545
		289.08	0.012035
		220.942	0.33012
	CD4+ T cells (x 104)	505.274	0.141676
		806.528	0.21818
		271.755	0.160462
		291.307	2.5938
	CD8+ T cells (x 104)	174.338	0.099173
		240.135	0.181816
		79.3038	0.120347
		74.4242	0.4716

## Sheet: Figure 2—figure supplement 1D
Figure 2—figure supplement 1—source data 1
Figure 2—figure supplement 1D. The numbers of DN, DP, CD4+ and CD8+ thymocytes in chimeric mice co-transferred with WT and KO bone marrow cells.
		WT	KO	WT/(WT+KO)	KO/(WT+KO)	% in thymus	WT	KO
Co-transfer	DN cells (x 104)	48.599	46.7766	0.509554	0.490446	Day0	20	80
		39.7398	37.1481	0.516854	0.483146	DN	56.3	43.7
		42.7885	13.9717	0.753846	0.246154	DP	99.9	0.1
Average		13.2077	14.6752	0.473684	0.526316	CD4	99.7	0.2
Sticatical data	DN_average			0.563485	0.436515	CD8	98.9	1.1
	DP cells (x 105)	357.203	0.364493	0.998981	0.00101937
		243.32	0.302368	0.998759	0.00124113
		298.079	0.349294	0.99883	0.00117045
		125.131	0.0489173	0.999609	0.000390778
	DP_average			0.999045	0.000955432
	CD4+ T cells (x 104)	479.916	1.82246	0.996217	0.0037831
		450.096	1.72782	0.996176	0.00382409
		320.04	0.873234	0.997279	0.00272109
		390.849	0.489173	0.99875	0.00125
	CD4_average			0.997105	0.00289457
	CD8+ T cells (x 104)	137.292	1.82246	0.9869	0.0131004
		122.675	1.72782	0.986111	0.0138889
		95.6192	1.30985	0.986486	0.0135135
		97.3455	0.489173	0.995	0.005
	CD8_average			0.988624	0.0113757
