# Supplementary material for: Zinc finger protein Zfp335 controls early T-cell development and survival through β-selection-dependent and -independent mechanisms
Source: eLife. 2022 Feb 3;11:e75508. doi: 10.7554/eLife.75508 (PMC8871394; doi:10.7554/eLife.75508)
Supplement: Figure 2—figure supplement 2—source data 1. [file elife-75508-fig2-figsupp2-data1.xlsx]

## Sheet: Figure 2—figure supplement 2B,C
Figure 2—figure supplement 2—source data 1
The percentages and numbers of γδ T cells in WT and KO mice 2 and 4 days post co-culture in vitro
	Day 2	WT	KO	Day 4	WT	KO
Separate culture	% TCRδ+ T cells	4.77	4.26	% TCRδ+ T cells	6.75	15.01
		5.08	4.84		4.38	16.21
		3.97	4.98		3.89	16.22
	TCRδ+ T cells (x 102)	3.54498	2.50896	TCRδ+ T cells (x 102)	18.1731	5.36665
		3.49729	2.61753		13.3986	5.30471
		3.1077	3.09881		11.3531	5.01219
