# Supplementary material for: Zinc finger protein Zfp335 controls early T-cell development and survival through β-selection-dependent and -independent mechanisms
Source: eLife. 2022 Feb 3;11:e75508. doi: 10.7554/eLife.75508 (PMC8871394; doi:10.7554/eLife.75508)
Supplement: Figure 2—source data 1. — Figure 2F, G. The percentages of DN, DP, CD4+, and CD8+ thymocytes 2 and 4 days post coculture in vitro . Figure 2J. The percentages of DN, DP, CD4+, and CD8+ thymocytes in chimeric mice separately transferred with WT and KO bone marrow cells. Figure 2L. The percentages of DN, DP, CD4+, and CD8+ 7 thymocytes in chimeric mice cotransferred with WT and KO bone marrow cells. [file elife-75508-fig2-data1.xlsx]

## Sheet: Figure 2C, D
Figure 2—source data 1
Figure 2C, D. The percentages of DN, DP, CD4+ and CD8+ thymocytes 2 and 4 days post separate culture in vitro
	Day 2	WT	KO	Day 4	WT	KO
Separate culture	% DN cells	83.48	91.63	% DN cells	65.94	96.46
		83.71	92.44		67.15	96.52
		83.85	91.55		65.8	96.31
	% DP cells	3.56	2.13	% DP cells	13.25	0.84
		3.43	1.82		13.13	0.97
		3.6	2.02		13.47	0.81
	% CD4+ T cells	1.59	2.36	% CD4+ T cells	12.42	1.22
		1.38	1.33		10.73	1.14
		1.65	1.31		11.43	1.15
	% CD8+ T cells	11.37	3.89	% CD8+ T cells	8.39	1.48
		11.47	4.41		8.98	1.37
		10.9	5.12		9.3	1.74

## Sheet: Figure 2F, G
Figure 2—source data 1
Figure 2F, G. The percentages of DN, DP, CD4+ and CD8+ thymocytes 2 and 4 days post co-culture in vitro
	Day 2	WT	KO	Day 4	WT	KO
Co-culture	% DN cells	70.6	90.08	% DN cells	65.14	93.26
		67.96	90.33		54.88	93.84
		71.01	90.48		55.73	94.28
	% DP cells	10.26	2.51	% DP cells	19.59	0.56
		12.13	2.53		19.39	0.82
		10.38	2.21		19.6	0.61
	% CD4+ T cells	7.62	1.99	% CD4+ T cells	14.1	1.5
		9.49	2.6		19.18	1.98
		8.59	2.59		17.36	1.23
	% CD8+ T cells	11.52	5.42	% CD8+ T cells	8.03	4.68
		10.42	4.54		6.36	3.35
		10.02	4.72		7.51	3.88

## Sheet: Figure 2J
Figure 2—source data 1
Figure 2J. The percentages of DN, DP, CD4+ and CD8+ thymocytes in chimeric mice separately transferred with WT and KO bone marrow cells.
		WT	KO
Separate transfer	% DN cells	1.62	95.34
		1.71	94.95
		1.32	94.35
		1.22	75.46
	% DP cells	83.54	1.04
		83.45	1.24
		88	1.79
		84.75	12.79
	% CD4+ T cells	11.04	2.06
		11.44	2.14
		8.27	2.31
		11.18	9.64
	% CD8+ T cells	3.8	1.55
		3.4	1.67
		2.41	1.56
		2.86	2.1

## Sheet: Figure 2L
Figure 2—source data 1
Figure 2L. The percentages of DN, DP, CD4+ and CD8+ thymocytes in chimeric mice co-transferred with WT and KO bone marrow cells.
		WT	KO
Co-transfer	% DN cells	1.15	86.12
		1.3	84.63
		1.24	71.23
		0.75	91.38
	% DP cells	84.29	7.13
		79.89	7.08
		86.68	17.49
		71.4	3.63
	% CD4+ T cells	11.32	3.2
		14.78	4.2
		9.3	5.07
		22.3	2.52
	% CD8+ T cells	3.24	3.55
		4.03	4.09
		2.78	6.21
		5.55	2.47
