# Supplementary material for: Zinc finger protein Zfp335 controls early T-cell development and survival through β-selection-dependent and -independent mechanisms
Source: eLife. 2022 Feb 3;11:e75508. doi: 10.7554/eLife.75508 (PMC8871394; doi:10.7554/eLife.75508)
Supplement: Figure 3—source data 1. — Figure 3E–G. The ratio of DN3 to DN4 thymocytes 2 days post culture in vitro. Figure 3I–K. The ratio of DN3 to DN4 thymocytes in chimeric mice transferred with WT and KO bone marrow cells. [file elife-75508-fig3-data1.xlsx]

## Sheet: Figure 3B, C
Figure 3—source data 1
Figure 3B, C. The percentages and numbers of DN3 and DN4 thymocytes from WT and KO mice
		WT	KO
	% DN3 cells	50.69	71.65
		50.4	70.8
		52.64	77.26
		59.93	67.09
	% DN4 cells	43.25	21.4
		41.93	24.08
		40.31	15.71
		31.04	24.17
	DN3 cells (x 105)	5.092	1.8101
		7.92	0.7848
		4.97	1.311
		6.02	1.5
	DN4 cells (x 105)	2.736	0.6448
		4.29	0.6601
		2.8	0.1692
		3.33	0.51

## Sheet: Figure 3E, G
Figure 3—source data 1
Figure 3E, G. The ratio of DN3 to DN4 thymocytes 2 days post culture in vitro
	Separate culture	WT	KO
	Ratio of DN3/DN4	0.94927	1.58854
		1.09066	1.67357
		1.27044	1.72563
	Co-culture
	Ratio of DN3/DN4	0.96	1.47
		0.97	1.37
		1.01	1.5

## Sheet: Figure 3I, K
Figure 3—source data 1
Figure 3I, K. The ratio of DN3 to DN4 thymocytes in chimeric mice transferred with WT and KO bone marrow cells.
	Separate transfer	WT	KO
	Ratio of DN3/DN4	0.44	4.32
		0.76	3.05
		0.84	1.81
		0.59	2.1
	Co-transfer
	Ratio of DN3/DN4	0.17	0.99
		0.51	0.79
		0.16	0.37
		0.18	0.62
