# Supplementary material for: Zinc finger protein Zfp335 controls early T-cell development and survival through β-selection-dependent and -independent mechanisms
Source: eLife. 2022 Feb 3;11:e75508. doi: 10.7554/eLife.75508 (PMC8871394; doi:10.7554/eLife.75508)
Supplement: Figure 4—figure supplement 1—source data 1. [file elife-75508-fig4-figsupp1-data1.xlsx]

## Sheet: Figure 4—figure supplement 1B
Figure 4—figure supplement 1—source data 1
Figure 4—figure supplement 1B. The percentages of Ki67+ thymocytes in DN3 and DN4 cells from WT and KO mice
		WT	KO
	% Ki67+ DN3 cells	4.83	12.92
		3.29	6.98
		5.45	6.6
	% Ki67+ DN4 cells	7.03	13.59
		4.42	15.02
		8.6	10.98
