# Supplementary material for: Zinc finger protein Zfp335 controls early T-cell development and survival through β-selection-dependent and -independent mechanisms
Source: eLife. 2022 Feb 3;11:e75508. doi: 10.7554/eLife.75508 (PMC8871394; doi:10.7554/eLife.75508)
Supplement: Figure 4—figure supplement 2—source data 1. [file elife-75508-fig4-figsupp2-data1.xlsx]

## Sheet: Figure 4—figure supplement 2B,C
Figure 4—figure supplement 2—source data 1
Figure 4—figure supplement 2B,C. The percentages of DN3a and DN3b cells from WT and KO mice
		WT	KO
	% DN3a cells	72.97	72.43
		74.88	77.99
		70.8	77.19
	% DN3b cells	21.55	19.85
		19.58	16.93
		21.68	16.96

## Sheet: Figure 4—figure supplement 2E,F
Figure 4—figure supplement 2—source data 1
Figure 4—figure supplement 2E,F. The percentages of Annexin V+ DN3a and DN3b cells from WT and KO mice
		WT	KO
	% Annexin V+ DN3a cells	4.74	11.92
		5.87	14.96
		5.43	11
	% Anneixn V+ DN3b cells	5.47	19.18
		9.19	15.24
		3.29	15.65
