# Supplementary material for: Zinc finger protein Zfp335 controls early T-cell development and survival through β-selection-dependent and -independent mechanisms
Source: eLife. 2022 Feb 3;11:e75508. doi: 10.7554/eLife.75508 (PMC8871394; doi:10.7554/eLife.75508)
Supplement: Figure 4—source data 1. — Figure 4D. The percentages of Annexin V+ DN3 and DN4 cells from WT and KO mice. Figure 4F. The percentage of Annexin V+ DN3 and DN4 cells 4 days post coculture in vitro. Figure 4H. The percentage of Annexin V+ DN3 and DN4 cells in chimeric mice cotransferred with WT and KO bone marrow cells. [file elife-75508-fig4-data1.xlsx]

## Sheet: Figure 4B
Figure 4—source data 1
Figure 4B. The percentages of BrdU+ thymocytes in DN3 and DN4 cells from WT and KO mice
		WT	KO
	% BrdU+ DN3 cells	15.31	15.61
		9.9	11.89
		12.61	13.9
	% BrdU+ DN4 cells	24.66	34.62
		18.54	35.48
		21.6	35.05

## Sheet: Figure 4D
Figure 4—source data 1
Figure 4D. The percentages of Annexin V+ DN3 and DN4 cells from WT and KO mice
		WT	KO
In vivo	% Annexin V+ DN3 cells	3.79	18.9
		4.68	11.86
		4.94	13.81
	% Annexin V+ DN4 cells	9.33	34.11
		7.18	20.94
		9.03	26.99

## Sheet: Figure 4F
Figure 4—source data 1
Figure 4F. The percentage of Annexin V+ DN3 and DN4 cells 4 days post co-culture in vitro
		WT	KO
In vitro	% Annexin V+ DN3 cells	4.81	18.15
		3.93	19.64
		4.47	21.36
	% Annexin V+ DN4 cells	11.25	14.92
		9.98	16.63
		9.34	15.06

## Sheet: Figure 4H
Figure 4—source data 1
Figure 4H. The percentage of Annexin V+ DN3 and DN4 cells in chimeric mice co-transferred with WT and KO bone marrow cells.
		WT	KO
BMC	% Annexin V+ DN3 cells	1.81	3
		1.84	3.62
		1.35	2.78
		1.28	2.48
	% Annexin V+ DN4 cells	3.11	7.14
		3.2	14.11
		3.37	11.67
		3.03	6.63
