# Supplementary material for: Zinc finger protein Zfp335 controls early T-cell development and survival through β-selection-dependent and -independent mechanisms
Source: eLife. 2022 Feb 3;11:e75508. doi: 10.7554/eLife.75508 (PMC8871394; doi:10.7554/eLife.75508)
Supplement: Figure 5—figure supplement 2—source data 1. [file elife-75508-fig5-figsupp2-data1.xlsx]

## Sheet: Figure 5—figure supplement 2B
Figure 5—figure supplement 2—source data 1
Figure 5—figure supplement 2B. Intercellular CD3 expression in Zfp335-deficient DN3 and DN4 thymocytes
		WT	KO
	% iCD3+ DN3 cells	95.09	87.82
		89	87
		95.49	88.24
			90.56
	% iCD3+ DN4 cells	86.44	86.49
		87.9	89.52
		83.14	86.08
			80.97
