# Supplementary material for: Zinc finger protein Zfp335 controls early T-cell development and survival through β-selection-dependent and -independent mechanisms
Source: eLife. 2022 Feb 3;11:e75508. doi: 10.7554/eLife.75508 (PMC8871394; doi:10.7554/eLife.75508)
Supplement: Figure 5—figure supplement 4—source data 1. [file elife-75508-fig5-figsupp4-data1.xlsx]

## Sheet: Figure 5—figure supplement 4B,C
Figure 5—figure supplement 4—source data 1
Figure 5—figure supplement 4B,C. The percentages of Annexin V+ DN3 and DN4 cells in WT, KO, OT1Tg and OT1TgKO mice
		WT	KO	OT1Tg	OT1TgKO
	% Annexin V+ DN3 cells	2.83	19.29	7.84	27.08
		2.23	22.33	9.67	26.46
		2.28	26.34	6.83	21.55
			29.42		35.02
			22.41		24.8
	% Annexin V+ DN4 cells	6.82	20.98	12.95	22.96
		6.32	13.99	17.51	16.59
		5.25	13.6	17.28	26.02
			12.65		25.31
			15.48		22.77
