# Supplementary material for: Zinc finger protein Zfp335 controls early T-cell development and survival through β-selection-dependent and -independent mechanisms
Source: eLife. 2022 Feb 3;11:e75508. doi: 10.7554/eLife.75508 (PMC8871394; doi:10.7554/eLife.75508)
Supplement: Figure 5—figure supplement 5—source data 1. [file elife-75508-fig5-figsupp5-data1.xlsx]

## Sheet: Figure 5—figure supplement 5
Figure 5—figure supplement 5—source data 1
Figure 5—figure supplement 5. The numbers of DN, DP, CD4+ and CD8+ thymocytes in WT, KO, OT1Tg and OT1TgKO mice
		WT	KO	OT1Tg	OT1TgKO
	DN cells (x106)	3.53733	0.21715	25.346	0.767356
		3.41348	0.891919	20.6988	0.804918
		4.50525	2.15359	37.2552	0.824291
			1.31375		1.95405
			0.598762		1.2
	DP cells (x106)	50.0703	0.004235	122.174	0.00262
		50.0789	0.286493	83.4931	0.002517
		58.9983	0.019745	96.8202	0.00219
			0.050387		0.007211
			0.209996		0.0058
	CD4+ T cells (x106)	10.4594	0.006834	87.924	0.011604
		8.02035	0.024902	36.5652	0.012126
		8.55251	0.004388	42.0565	0.009855
			0.01076		0.031246
			0.010294		0.02
	CD8+ T cells (x106)	2.73829	0.003465	73.553	0.016844
		4.5279	0.00324	47.8139	0.015101
		3.8977	0.00312	48.4462	0.012319
			0.002		0.036533
			0.0048		0.02
