# Supplementary material for: Zinc finger protein Zfp335 controls early T-cell development and survival through β-selection-dependent and -independent mechanisms
Source: eLife. 2022 Feb 3;11:e75508. doi: 10.7554/eLife.75508 (PMC8871394; doi:10.7554/eLife.75508)
Supplement: Figure 5—source data 1. — Figure 5H, I. The percentages of iTCRβ+ DN3 and DN4 cells in WT, KO, OT1Tg, and OT1Tg KO mice. Figure 5K, L. The percentages and numbers of DN3 and DN4 thymocytes in WT, KO, OT1Tg, and OT1Tg KO mice. Figure 5N. The percentages of DN, DP, CD4+, and CD8+ thymocytes in WT, KO, OT1Tg, and OT1Tg KO mice. [file elife-75508-fig5-data1.xlsx]

## Sheet: Figure 5B
Figure 5—source data 1
Figure 5B. The percentages and numbers of iTCRβ+ thymocytes in DN3 and DN4 cells from WT and KO mice
		WT	KO
	% iTCRβ+ DN3 cells	15.91	12.59
		14.79	13.52
		21.38	18.72
			15.3
	% iTCRβ+ DN4 cells	60.22	21.41
		57.62	30.98
		55.18	44.62
			34
	iTCRβ+ DN3 cells (x 105)	4.62207	2.47561
		5.4888	6.5284
		11.876	1.6161
			2.52727
	iTCRβ+ DN4 cells (x 105)	13.446	2.89357
		13.722	8.47547
		20.783	1.40966
			2.94848

## Sheet: Figure 5H, I
Figure 5—source data 1
Figure 5H, I. The percentages of iTCRβ+ DN3 and DN4 cells in WT, KO, OT1Tg and OT1Tg KO mice
		WT	KO	OT1Tg	OT1TgKO
	% iTCRβ+ DN3 cells	23.92	21.62	99.78	98.36
		29.84	15.67	99.91	98.76
		22.41	22.45	99.74	97.91
			20.88		96.71
			16.35		99
	% iTCRβ+ DN4 cells	79.54	36.45	88.44	80.41
		80.08	29.04	87.93	86.17
		80.55	40.28	87.83	77.2
			27.65		75.9
			33.64		93.38
	iTCRβ+ DN3 cells (x 104)	14.3648	6.37205	4.55565	2.6951
		11.4075	3.80863	4.56393	4.62176
		10.2817	10.0437	8.664	3.06611
			2.48631		6.68173
			3.88811		4.322
	iTCRβ+ DN4 cells (x 104)	25.1384	1.67483	21.1216	6.15756
		38.61	7.18007	14.4972	13.7051
		65.429	3.49793	23.104	6.7345
			7.31634		9.512
			5.125		7.566

## Sheet: Figure 5K, L
Figure 5—source data 1
Figure 5K, L. The percentages and numbers of DN3 and DN4 thymocytes in WT, KO, OT1Tg and OT1Tg KO mice
		WT	KO	OT1Tg	OT1TgKO
	% DN3 cells	54.66	77.5	9.47	22.06
		48.72	67.61	15.32	20.63
		43.31	72.1	12.66	24.36
			69.5		19.17
			75		17.43
	% DN4 cells	33.63	14.58	83.43	69.48
		34.91	20.24	76.81	68.72
		35.45	12.27	81.24	70.14
			18.3		73.1
			21		75.53
	DN3 cells (x 105)	4.39922	0.534213	0.289905	0.119782
		3.07125	1.8101	0.32216	0.157872
		3.92574	0.7848	0.4693	0.082128
			1.21		0.211508
			0.98001		0.16
	DN4 cells (x 105)	2.6934	0.100105	2.4849	0.378063
		2.19375	0.6448	1.63765	0.523952
		3.17798	0.6601	3.1046	0.309349
			0.1692		0.91333
			0.40211		0.541

## Sheet: Figure 5N
Figure 5—source data 1
Figure 5N. The percentages of DN, DP, CD4+ and CD8+ thymocytes in WT, KO, OT1Tg and OT1Tg KO mice
		WT	KO	OT1Tg	OT1TgKO
	% DN cells	5.29	93.72	8.2	96.09
		5.16	90.6	10.98	96.42
		5.93	92.1	16.59	96.41
			91		97.14
			93.4		96.3
	% DP cells	74.95	1.83	39.54	0.33
		75.83	5.28	44.27	0.3
		77.68	1.5	43.12	0.29
			3.23		0.25
			6		0.36
	% CD4+ T cells	15.65	2.97	28.45	1.46
		12.15	2.63	19.39	1.46
		11.26	2.82	18.72	1
			2.53		1.16
			3.2		1.54
	% CD8+ T cells	4.1	1.48	23.81	2.12
		6.86	1.49	25.36	1.81
		5.13	1.6	21.57	2.3
			1.52		1.46
			1.43		1.8
