# Supplementary material for: Zinc finger protein Zfp335 controls early T-cell development and survival through β-selection-dependent and -independent mechanisms
Source: eLife. 2022 Feb 3;11:e75508. doi: 10.7554/eLife.75508 (PMC8871394; doi:10.7554/eLife.75508)
Supplement: Figure 7—figure supplement 2—source data 1. [file elife-75508-fig7-figsupp2-data1.xlsx]

## Sheet: Figure 7—figure supplement 2B,C
Figure 7—figure supplement 2—source data 1
Figure 7—figure supplement 2B, C. The percentages and numbers of DN, DP, CD4+ and CD8+ thymocytes from WT, KO and Trp53DKO mice
		WT	KO	Trp53DKO
	% DN cells	6.55	82.91	36.96
		4.85	92.41	38.92
		3.72	68.82	43.57
		3.59	83.93
	% DP cells	81.31	14.57	50.38
		84.95	5.56	52.15
		83.29	25.31	45.67
		82.15	12.53
	DN cells (x105)	54.3192	0.763393	4.69066
		48.36	2.81808	12.1431
		56.991	1.23814	7.00027
		27.8967	5.63666
	DP cells (x106)	67.4472	0.0134127	0.639374
		84.66	0.016872	1.62671
		127.62	0.045507	0.733773
		63.9214	0.0840708
