# Supplementary material for: Zinc finger protein Zfp335 controls early T-cell development and survival through β-selection-dependent and -independent mechanisms
Source: eLife. 2022 Feb 3;11:e75508. doi: 10.7554/eLife.75508 (PMC8871394; doi:10.7554/eLife.75508)
Supplement: Figure 7—figure supplement 3—source data 1. [file elife-75508-fig7-figsupp3-data1.xlsx]

## Sheet: Figure 7—figure supplement 3
Figure 7—figure supplement 3—source data 1
Figure 7—figure supplement 3. iTCRβ expression in DN4 cells infected by Zfp335, Bcl6 and Rorc overexpression retrovirus
		WT_Mock	KO_Mock	KO_Zfp335	KO_Bcl6	KO_Rorc
	iTCRβ MFI	700.2	491.2	818	333.1	516.7
		750.2	493.9	620.5	307	546
		838.3	479.6	666.8	242.8	554.8
