# Supplementary material for: Zinc finger protein Zfp335 controls early T-cell development and survival through β-selection-dependent and -independent mechanisms
Source: eLife. 2022 Feb 3;11:e75508. doi: 10.7554/eLife.75508 (PMC8871394; doi:10.7554/eLife.75508)
Supplement: Figure 7—source data 1. — Figure 7E. The percentages of Annexin V+ DN cells differentiated from KO DN3 thymocytes transduced with Mock, or Zfp335, Bcl6, and Rorc genes. Figure 7G. The percentages of Annexin V+ DP cells differentiated from KO DN3 thymocytes transduced with Mock, or Zfp335, Bcl6, and Rorc genes. [file elife-75508-fig7-data1.xlsx]

## Sheet: Figure 7C
Figure 7—source data 1
Figure 7C. The percentages of DP cells differentiated from KO DN3 thymocytes tranduced with mock, Zfp335, Bcl6 and Rorc
		KO_Mock	KO_Zfp335	KO_Bcl6	KO_Rorc
	% DP cells	3.07	29.91	26.09	18.85
		0.63	30.12	30.49	16.53
		2.97	29.61	27.09	13.99

## Sheet: Figure 7E
Figure 7—source data 1
Figure 7E. The percentages of Annexin V+ DN cells differentiated from KO DN3 thymocytes tranduced with mock, Zfp335, Bcl6 and Rorc
		KO_Mock	KO_Zfp335	KO_Bcl6	KO_Rorc
	% Annexin V+ DN cells	39.39	19.19	26.54	45.28
		47.73	16.83	27.14	41.04
		40.69	17.76	23.55	39.16

## Sheet: Figure 7G
Figure 7—source data 1
Figure 7G. The percentages of Annexin V+ DP cells differentiated from KO DN3 thymocytes tranduced with Mock, Zfp335, Bcl6 and Rorc
		KO_Mock	KO_Zfp335	KO_Bcl6	KO_Rorc
	% Annexin V+ DP cells	19.35	4.98	8.11	5.1
		19.12	2.7	11.11	7.14
		18.89	4.05	11.36	5.41
