# Supplementary material for: Zinc finger protein Zfp335 controls early T-cell development and survival through β-selection-dependent and -independent mechanisms
Source: eLife. 2022 Feb 3;11:e75508. doi: 10.7554/eLife.75508 (PMC8871394; doi:10.7554/eLife.75508)
Supplement: Supplementary file 1. [file elife-75508-supp1.xlsx]

## Sheet: Down FC>1.25
AccID	log2FC	Pvalue	FDR	WT1_count	WT2_count	KO1_count	KO2_count	WT1_RPKM	WT2_RPKM	KO1_RPKM	KO2_RPKM
Zfp335os	-3.67034	5.58e-09	4.13e-07	95	111	13	3	1.99543	2.0325	0.258504	0.0658793
Grrp1	-3.3094	0.0492904	1	11	9	1	1	0.347469	0.247833	0.0299043	0.0330246
Dctn1	-2.6625	3.62e-62	4.45e-58	3431	3913	683	460	31.7831	31.5995	5.98973	4.455
Zfp335	-2.61622	9.55e-47	5.87e-43	1481	1562	290	200	17.6517	16.2296	3.27221	2.49216
Dph6	-2.19199	6.34e-23	2.78e-20	545	550	119	117	11.4181	10.0451	2.36024	2.5627
Elavl3	-2.17071	0.0332112	1	21	20	5	4	0.238843	0.198297	0.0538361	0.0475628
Ankle2	-2.17409	1.1e-43	3.39e-40	1205	1307	279	268	13.1004	12.3871	2.87153	3.04613
Psmg2	-2.087	2.67e-25	1.64e-22	823	988	248	171	44.433	46.5004	12.6756	9.65198
Fam171a1	-1.87759	0.0342097	0.269707	29	23	6	8	0.399918	0.2765	0.0783311	0.115339
Cep76	-1.81068	2.13e-19	5.68e-17	1013	1030	344	232	13.4411	11.914	4.3211	3.21831
Fgf13	-1.8058	6.02e-15	9.13e-13	534	538	176	127	11.5517	10.1457	3.60436	2.87225
Habp4	-1.58161	1.77e-06	8.07e-05	168	198	65	55	3.74184	3.84446	1.37057	1.28072
Tesc	-1.41342	0.0329691	0.265518	39	56	24	11	2.16276	2.70723	1.25998	0.637749
Bcl6	-1.38423	4.87e-05	0.00147705	244	321	143	70	2.70622	3.10365	1.50148	0.811681
Hoxa4	-1.31922	0.0471522	0.329502	30	63	21	15	1.12254	2.05501	0.743889	0.586792
Cmtm4	-1.26416	2.75e-08	1.78e-06	351	408	162	148	2.59481	2.62937	1.13377	1.14386
Macrod2	-1.24498	0.0284533	0.24207	47	62	25	20	0.549979	0.632461	0.276948	0.244677
Tmcc3	-1.19223	7.24e-06	0.000282255	309	318	158	113	3.04078	2.72802	1.47195	1.16257
Agap1	-1.19547	0.00283452	0.0466158	106	121	44	53	0.632553	0.629463	0.248573	0.33066
Tbck	-1.16023	4.39e-07	2.25e-05	376	382	171	163	3.1712	2.80862	1.36535	1.43727
Nup205	-1.15152	1.43e-28	1.46e-25	6398	6828	3110	2751	56.4597	52.5268	25.9815	25.3804
Ddx31	-1.08631	1.3e-09	1.09e-07	616	696	323	284	10.5828	10.4237	5.25329	5.10095
Cdkn2c	-0.998542	5.17e-07	2.63e-05	1174	1093	671	455	32.9356	26.7308	17.8209	13.3451
Nrg2	-0.99695	0.000788308	0.0160603	303	263	170	112	3.36255	2.54434	1.78602	1.29945
Mrpl38	-0.968134	5.76e-12	6.49e-10	1155	1364	627	634	46.8012	48.1818	24.0521	26.8583
Suds3	-0.946287	1.24e-12	1.48e-10	1952	2419	1228	996	46.0795	49.7803	27.4433	24.5811
Prdm16	-0.952426	0.00950528	0.116772	177	209	69	125	1.17564	1.21015	0.43387	0.868008
Slc36a4	-0.937112	0.000223273	0.00560922	313	310	149	171	3.09185	2.66949	1.39338	1.76597
Usp1	-0.858512	1.96e-18	4.72e-16	7150	8267	4465	3884	113.681	114.584	67.2069	64.5618
Stam2	-0.857951	2.07e-05	0.000704951	488	576	266	308	6.76555	6.96145	3.49121	4.46425
Msantd3	-0.846588	0.022313	0.207978	107	174	86	66	1.05024	1.48884	0.799125	0.677274
Adk	-0.826763	9.14e-10	7.86e-08	1333	1589	868	748	21.8252	22.6801	13.4542	12.8039
Elfn2	-0.825277	4.63e-06	0.000187238	2660	3123	1304	1877	12.3245	12.614	5.71972	9.09212
Neurl1b	-0.775001	0.00314314	0.0506739	237	264	159	129	2.1873	2.12402	1.38921	1.2447
Idh1	-0.770815	0.00191663	0.0343233	248	315	173	150	6.20537	6.871	4.098	3.92393
Glcci1	-0.745259	2.05e-06	9.12e-05	2289	2654	1262	1618	21.105	21.3322	11.0156	15.5967
Rpn1	-0.734985	7.54e-11	7.18e-09	4375	5106	3075	2521	68.6816	69.8774	45.7001	41.376
Lrig1	-0.717118	0.0133597	0.148568	550	627	484	225	6.33225	6.29298	5.27535	2.70827
Tle1	-0.711463	0.0370043	0.283505	147	188	124	77	0.728306	0.811985	0.581605	0.398842
Gtf3c4	-0.712615	6.58e-07	3.27e-05	1672	1707	968	1059	13.4132	11.9378	7.35159	8.88189
Hspa4l	-0.6834	0.000323932	0.0077272	1257	1014	720	684	7.42441	5.22106	4.02596	4.22374
Whrn	-0.68038	1.67e-06	7.62e-05	996	1188	701	635	13.6528	14.1962	9.09683	9.10017
Ccdc88a	-0.667892	0.00216348	0.0376997	383	389	234	244	2.47098	2.18783	1.42921	1.64579
Hectd3	-0.650431	6.58e-06	0.000260053	1079	1243	703	746	13.5526	13.6102	8.35921	9.79609
Adgra3	-0.630343	0.00221851	0.0383559	466	456	316	272	5.95381	5.07888	3.82214	3.63322
Srebf2	-0.611168	4.98e-08	3.1e-06	8112	9725	6368	5097	87.0984	91.0261	64.7285	57.2152
Cs	-0.609264	2.98e-08	1.92e-06	7481	8415	5662	4590	151.245	148.31	108.368	97.0173
P4ha1	-0.607848	0.00151236	0.0281505	523	568	392	313	7.39605	7.0023	5.24801	4.62761
Lrfn4	-0.604261	0.00224053	0.0386586	607	785	525	373	11.8893	13.4039	9.73504	7.6382
Ccna2	-0.594793	1.13e-09	9.53e-08	7502	8684	5642	4882	127.542	128.703	90.8069	86.7735
Mxd3	-0.588605	7.85e-05	0.00224507	907	1109	706	608	36.4422	38.8439	26.8542	25.5396
Sox12	-0.577957	0.00192333	0.0343932	477	614	380	335	6.14793	6.89879	4.63665	4.51408
Banp	-0.575058	3.41e-05	0.00107846	1039	1247	789	715	10.8047	11.3047	7.76756	7.77351
Zfp382	-0.569394	0.0010744	0.0209841	811	765	546	503	5.56711	4.57788	3.54823	3.60987
Spidr	-0.561548	0.00049661	0.0109851	687	868	541	490	9.19664	10.1295	6.85615	6.85777
Glrx2	-0.558068	0.0137341	0.151051	367	451	241	301	5.82377	6.2389	3.62047	4.99365
Dync1li2	-0.544201	0.00163551	0.0299511	739	728	492	499	6.77657	5.81957	4.27111	4.78388
Pknox1	-0.540906	2.04e-05	0.000701256	1998	2095	1357	1408	25.346	23.1682	16.2969	18.6737
Ndc80	-0.536181	1.85e-05	0.000644328	1455	1741	1086	1072	37.7959	39.4253	26.7068	29.1133
Zcchc3	-0.536377	0.0171948	0.176065	291	357	216	221	5.38613	5.76031	3.78485	4.27652
Timmdc1	-0.529291	0.00530473	0.0756332	461	520	360	308	12.6901	12.4785	9.38163	8.86401
Dhrs13	-0.529445	0.0112722	0.130888	340	413	265	246	11.1464	11.8032	8.22454	8.4315
Dnaja1	-0.517281	1.13e-05	0.000421626	5576	5822	4331	3524	92.7297	84.4038	68.1859	61.2698
Nefh	-0.508205	0.000551352	0.0119671	1416	1487	1123	890	20.2702	18.5566	15.2189	13.3198
Noc2l	-0.507986	1.1e-05	0.000410499	7226	9473	6289	5199	148.346	169.535	122.227	111.586
Fkbp4	-0.501495	2.94e-05	0.000947312	13176	14919	11099	8440	347.638	343.144	277.228	232.809
Oxct1	-0.486333	0.000164142	0.00421858	3005	3435	2552	1971	49.3421	49.1693	39.6702	33.8356
Rtkn2	-0.48938	0.00583758	0.0811252	618	629	433	441	5.07014	4.49859	3.36302	3.78255
Myo5a	-0.48626	0.000562126	0.0121794	1593	1556	1172	1047	7.61784	6.48664	5.30584	5.23452
Mdm1	-0.486039	0.000145831	0.00385277	1446	1565	1104	1010	26.0638	24.591	18.8386	19.0329
Racgap1	-0.473266	1.65e-05	0.000582011	5022	5695	4162	3429	93.6803	92.6103	73.4994	66.8734
Depdc1b	-0.477058	0.0259897	0.228386	530	518	330	410	7.45082	6.34821	4.3919	6.02595
Mki67	-0.474763	2.52e-05	0.000837706	39279	39925	26760	29281	222.904	197.513	143.765	173.723
Tyro3	-0.472624	0.0179077	0.181016	379	436	293	283	4.86618	4.88011	3.56145	3.79883
Slc12a2	-0.464901	0.0226721	0.209261	408	443	334	273	3.24936	3.07564	2.51823	2.27308
Lmo4	-0.457141	0.000655313	0.0138802	1279	1519	1082	918	42.9144	44.4308	34.3693	32.2025
Fdft1	-0.454961	0.00473866	0.0690562	987	1193	889	673	11.0498	11.6431	9.42211	7.87708
Cmc2	-0.452628	0.00829497	0.105272	598	776	482	498	22.1871	25.0989	16.93	19.3171
Nsun2	-0.441436	2.52e-05	0.000837706	7279	8550	6255	5192	97.2367	99.5676	79.1035	72.5115
Eif4h	-0.425856	1.19e-06	5.59e-05	11945	13598	9735	8932	273.837	271.753	211.277	214.076
Pde5a	-0.425486	0.0223452	0.20812	549	560	394	418	4.6654	4.14856	3.16973	3.7137
Tuba1b	-0.414675	0.000777057	0.0158838	15630	19557	14747	11152	478.392	521.821	427.306	356.855
Anapc13	-0.406979	0.015759	0.166069	642	838	591	501	66.9818	76.2183	58.374	54.6479
Hs2st1	-0.409483	0.0174545	0.177508	611	643	461	467	4.14544	3.80307	2.96101	3.31253
Phf14	-0.402125	0.000979878	0.0194158	1652	1875	1299	1318	12.702	12.5678	9.45545	10.5948
Lmnb1	-0.398788	5.18e-05	0.0015587	11545	12690	9751	8336	232.177	222.475	185.646	175.266
Gosr2	-0.398754	0.00060559	0.0129611	1855	2161	1576	1413	34.2235	34.7559	27.5262	27.2544
Plxdc1	-0.394162	0.0161692	0.169055	612	723	498	497	12.045	12.4047	9.27888	10.2265
Hspd1	-0.388624	0.0041938	0.0628303	15956	16972	14481	10360	379.009	351.441	325.638	257.276
Exosc8	-0.389932	0.00089013	0.0178098	2037	2549	1807	1619	90.8459	99.1009	76.2926	75.4875
Acaca	-0.392808	0.00434155	0.0647607	2547	2707	1811	2114	15.2757	14.1532	10.2826	13.2554
Lonrf1	-0.388618	0.023308	0.21132	559	693	462	473	8.13245	8.78894	6.363	7.19424
Prickle1	-0.38252	0.00925475	0.114612	859	1006	750	654	5.3687	5.4811	4.43759	4.27334
Cct4	-0.376065	0.000422275	0.00960677	6837	7897	6121	5036	198.831	200.205	168.52	153.115
Ckap2	-0.376545	0.00559325	0.0787429	1050	1179	875	811	22.9748	22.489	18.1251	18.5523
Fam104a	-0.372294	0.00750412	0.0977605	1146	1459	1059	911	24.6323	27.3382	21.549	20.4716
Cux1	-0.370672	0.000307404	0.00739034	11473	11745	9337	8365	48.5646	43.3401	37.4163	37.0189
Hmgb2	-0.365789	0.00507238	0.072712	8066	10271	7996	5960	171.311	190.166	160.772	132.339
Cdh24	-0.36681	0.0165218	0.171573	755	960	659	641	15.8236	17.5397	13.0754	14.0453
Rab3ip	-0.363517	0.0292711	0.246598	646	713	563	476	12.1856	11.7246	10.0539	9.38722
Slbp	-0.356558	0.00112763	0.0219193	4999	5751	4527	3725	149.955	150.389	128.558	116.821
Ezh2	-0.355705	0.00100704	0.0198899	8640	9435	7646	6264	181.346	172.636	151.929	137.455
Mcph1	-0.349082	0.0348959	0.273752	708	736	600	517	5.62763	5.09992	4.51496	4.29632
Uhrf2	-0.346415	0.00317862	0.0510448	2142	2259	1759	1647	33.8215	31.0945	26.2936	27.1882
Ywhah	-0.345052	0.000418655	0.00954207	4692	5176	3885	3745	152.076	146.249	119.208	126.902
Sap30	-0.34319	0.0210205	0.201276	836	1045	773	679	40.4039	44.0278	35.3677	34.3085
Lpcat1	-0.34429	0.0423862	0.309753	539	633	465	440	8.75982	8.96817	7.15434	7.47606
Nudt4	-0.345057	0.00495024	0.071294	1583	1815	1299	1323	27.8741	27.8606	21.6541	24.3553
Emc8	-0.339098	0.0112033	0.130494	1151	1321	1023	896	13.3403	13.3471	11.2248	10.8571
Cox6a1	-0.335014	0.00823203	0.104864	4745	6649	4779	4035	508.992	621.763	485.313	452.514
Bach1	-0.331394	0.0431934	0.312225	2413	2549	2326	1572	21.0983	19.4292	19.2535	14.37
Pgm2l1	-0.330279	0.0362097	0.279596	873	869	690	675	5.78638	5.02118	4.32964	4.67746
Gspt1	-0.325751	0.000569152	0.0122883	8255	9277	7308	6439	69.1437	67.7387	57.9488	56.3856
Fbxo21	-0.328301	0.0206191	0.198827	1018	1246	861	902	14.8138	15.8064	11.8613	13.7227
Ndufa6	-0.324236	0.020663	0.198938	1187	1588	1143	1022	121.189	141.338	110.477	109.089
Ccdc34	-0.322531	0.0230065	0.209826	1120	1268	899	972	20.9129	20.64	15.8916	18.9748
Ngp	-6.80291	0.000449477	1	5	39	0	0	0.246229	1.67428	0	0
Igha	-6.32795	0.00101797	1	15	15	0	0	0.700095	0.610311	0	0
Ptpn5	-6.20779	0.00159904	1	11	17	0	0	0.163441	0.220196	0	0
Klrb1a	-5.00601	0.0442069	1	6	6	0	0	0.269267	0.234735	0	0
Cd40lg	-4.29746	0.0481888	1	2	19	1	0	0.0914791	0.757599	0.0433014	0
Rps6ka6	-3.7233	2.19e-05	0.000743871	61	44	7	1	0.744745	0.4683	0.080907	0.0127642
S100a9	-3.53908	0.0217226	1	1	50	1	3	0.109112	4.75592	0.103295	0.342221
Irs1	-3.35302	0.00907128	1	29	11	3	1	0.180952	0.0598344	0.0177213	0.00652347
Pcsk9	-2.9674	0.0229679	1	16	16	1	3	0.260476	0.227071	0.015412	0.0510602
LOC108169093	-2.93917	1.8e-07	1.02e-05	77	130	9	17	1.29141	1.90069	0.142899	0.298084
Nme6	-2.85833	1.11e-17	2.31e-15	316	306	54	31	14.126	11.9247	2.28526	1.4488
Rabl2	-2.51877	2.38e-09	1.93e-07	191	196	47	20	6.49633	5.81145	1.51336	0.711178
Ttc8	-2.48133	0.000239324	0.00593959	60	58	15	6	1.50591	1.26902	0.35641	0.157439
Gm29718	-2.3514	0.0245288	1	17	30	7	2	1.20293	1.85057	0.46892	0.147957
Polr3f	-2.35464	9.01e-19	2.26e-16	751	787	197	101	10.3216	9.42925	2.56322	1.45126
Tmed1	-2.28058	1.5e-08	1.03e-06	129	170	28	32	4.40592	5.06162	0.905347	1.14264
Lonrf3	-2.20277	0.000336805	0.00792565	79	59	20	10	0.596039	0.388055	0.142852	0.078879
LOC108168813	-2.17938	0.00146458	0.027452	54	65	20	6	1.65901	1.74086	0.581696	0.192717
Efnb1	-2.15532	0.000750585	0.0155496	54	87	23	8	0.919423	1.29132	0.370732	0.142405
Gm9008	-2.13214	1.25e-06	5.85e-05	103	139	31	23	2.57273	3.02667	0.733041	0.600618
Pcbd2	-2.08613	2.82e-09	2.19e-07	224	258	73	39	14.9966	15.0577	4.62676	2.72975
Wdr47	-2.06245	4.05e-05	0.0012608	123	116	41	16	1.64579	1.35307	0.519354	0.223822
Lrr1	-2.01227	1.91e-15	3.05e-13	333	440	93	94	12.6843	14.6106	3.35363	3.74337
Khdrbs3	-1.94836	0.00278429	0.0459745	42	57	12	13	1.26786	1.5	0.342936	0.410279
Ncbp3	-1.93868	0.00235837	0.0401828	41	200	27	32	0.37197	1.58178	0.231898	0.30352
Mira	-1.91688	2.37e-06	0.000104244	123	158	44	29	8.81261	9.86847	2.98444	2.17226
Gm13328	-1.86247	0.0208508	0.199963	22	46	9	9	1.08528	1.9782	0.420312	0.464168
Smyd1	-1.83194	0.0116463	0.13359	29	52	11	11	0.493323	0.771135	0.177148	0.195632
Gm41035	-1.84883	0.00305209	0.0495309	74	98	10	36	1.91012	2.2052	0.244365	0.971505
Spsb4	-1.8033	0.0194659	0.190539	24	63	16	8	0.614779	1.40683	0.388006	0.214246
Hoxa7	-1.79531	6.31e-06	0.000250712	145	172	58	32	4.24708	4.39182	1.60828	0.97991
Gm11942	-1.78057	0.00268945	0.0446828	44	95	22	17	5.37538	10.1175	2.54442	2.1713
Zbtb16	-1.76194	0.00156585	0.0289063	60	68	18	19	0.440708	0.435414	0.125165	0.145904
Smn1	-1.73975	0.0334574	0.266902	89	18	17	16	3.7526	0.66162	0.678581	0.705304
Ndufa4	-1.71359	2.28e-40	5.6e-37	2267	2906	823	720	263.444	294.392	90.5414	87.4749
Hoxa5	-1.71699	0.0218281	0.204889	30	41	9	12	0.913817	1.08872	0.259532	0.382149
Bex1	-1.72043	4.76e-05	0.00145104	129	217	36	65	8.51675	12.4893	2.25008	4.48654
1110038B12Rik	-1.66418	0.0305049	0.25185	32	52	20	6	1.55975	2.20954	0.922878	0.305752
Bex2	-1.65745	0.00464412	0.0679203	52	68	15	22	3.29609	3.75749	0.900113	1.45792
3000002C10Rik	-1.64307	0.00759287	0.0986029	45	61	14	19	2.01161	2.37714	0.592475	0.887972
Clip4	-1.60689	0.0167366	0.172926	34	54	13	15	0.466171	0.645436	0.168741	0.215016
Blcap	-1.60268	2.77e-06	0.000119016	172	184	53	62	4.45583	4.15539	1.29983	1.67921
Hadha	-1.57124	7.07e-36	1.24e-32	4386	4976	1744	1356	65.3891	64.6712	24.6146	21.1354
Raver2	-1.55912	0.0358438	0.277468	39	32	15	9	0.558848	0.399736	0.203484	0.13483
Cd4	-1.56589	5.67e-08	3.5e-06	312	609	156	144	5.55541	9.45307	2.62964	2.68064
Alpl	-1.55873	0.00320473	0.0512632	63	78	28	19	1.28048	1.38204	0.538767	0.403738
Sdc1	-1.53333	0.0245648	0.219316	117	107	69	9	2.18823	1.74455	1.2217	0.17598
Ccdc43	-1.5553	2.1e-18	4.95e-16	744	844	289	242	17.2009	17.0104	6.32537	5.84935
Rabggtb	-1.55424	2.36e-20	7.07e-18	965	1262	409	333	35.053	39.9623	14.0647	12.6461
Actr10	-1.52987	1.48e-20	4.65e-18	1036	1110	403	329	14.7272	13.7555	5.42345	4.88956
Cnnm1	-1.48566	0.00849903	0.107198	53	64	23	18	0.601239	0.632915	0.247007	0.21348
Gm11868	-1.47659	0.00106696	0.0209337	83	151	35	46	3.21727	5.10247	1.28436	1.86415
Plekha8	-1.43736	0.0426982	0.310751	45	31	15	13	0.382694	0.229823	0.120765	0.115584
Scara3	-1.4467	0.0095405	0.117088	56	73	18	28	0.909594	1.03366	0.276785	0.475479
Pi4kb	-1.40365	1.98e-17	4.05e-15	1069	1121	386	427	15.9539	14.5844	5.45365	6.66242
Zbtb8a	-1.40066	0.0251312	0.222915	40	58	15	21	1.02601	1.29692	0.364245	0.563152
Gm6210	-1.38276	0.000147966	0.00390077	163	143	57	59	4.4315	3.38916	1.46706	1.67698
Cd8b1	-1.37696	4.92e-35	7.56e-32	2763	3214	1167	1090	111.563	113.13	44.6087	46.0129
Wdr46	-1.38406	0.0187122	0.186887	46	170	32	46	0.607677	1.95775	0.400198	0.635311
Tbx21	-1.3324	0.0340714	0.269489	63	66	39	12	1.41144	1.28902	0.827173	0.281071
Bcam	-1.3554	0.021166	0.201854	47	75	17	29	1.11641	1.55303	0.382283	0.720175
Cask	-1.3243	0.00516361	0.0738475	86	94	45	26	0.588018	0.560291	0.291283	0.185857
Gm13410	-1.31577	0.0139494	0.152661	75	86	45	19	2.8954	2.89427	1.64464	0.766857
Gm42267	-1.32981	0.000460482	0.0102855	124	212	56	73	6.36412	9.4852	2.72092	3.917
Nrgn	-1.31561	0.00025331	0.00623631	127	209	69	62	5.61574	8.05645	2.88844	2.86622
Pdia5	-1.28481	0.000758311	0.0156529	136	166	77	45	4.29836	4.57368	2.3039	1.48693
Ap3m1	-1.28536	2.71e-17	5.36e-15	965	1118	428	410	12.4714	12.5957	5.2365	5.53968
Gm6091	-1.26792	0.0125997	0.142137	59	79	30	26	2.72479	3.18055	1.31164	1.25536
D430041D05Rik	-1.23428	9.09e-07	4.38e-05	486	498	256	158	2.01939	1.80388	1.00701	0.686364
Lyrm4	-1.2366	2.16e-07	1.18e-05	341	375	165	134	12.869	12.3371	5.895	5.28699
Tm9sf1	-1.23331	4.21e-17	8.08e-15	1228	1376	592	497	27.9055	27.2586	12.7357	11.8076
Gcat	-1.22674	0.003817	0.0584686	90	148	59	40	2.16844	3.10856	1.34576	1.00758
Nup85	-1.2058	2.53e-17	5.1e-15	3198	3637	1687	1231	84.6892	83.9627	42.2936	34.0817
Eftud2	-1.20437	2.61e-26	1.88e-23	7709	8812	3922	3129	130.75	130.29	62.974	55.4834
2020-09-15	-1.20307	2.35e-25	1.52e-22	3020	3477	1499	1273	114.349	114.769	53.7325	50.3927
Smc2	-1.19285	1.63e-27	1.43e-24	4808	5019	2230	2004	49.7007	45.2282	21.823	21.6576
Tanc2	-1.17086	0.00743958	0.097229	123	110	67	36	0.569614	0.444081	0.293739	0.174298
Suclg1	-1.16923	8.2e-17	1.53e-14	1518	1811	801	652	62.3497	64.8448	31.1462	27.9978
Gpr162	-1.15435	0.000135672	0.00363915	180	273	104	94	2.89084	3.82216	1.58123	1.57832
Rnf144b	-1.14853	0.0227201	0.20929	64	69	31	28	0.799643	0.751552	0.366681	0.365753
Hsph1	-1.1467	1.74e-15	2.85e-13	9803	8746	4627	3686	133.83	104.088	59.8006	52.6096
Gm41476	-1.16162	0.0441994	0.318469	77	134	21	69	2.53159	3.84062	0.65363	2.37173
Gm13910	-1.1235	3.28e-06	0.000136683	331	357	173	138	9.66041	9.08301	4.77996	4.21076
Gm40814	-1.1194	0.0334578	0.266902	96	115	25	69	2.13321	2.22769	0.525911	1.60297
Ppp1r1b	-1.09831	0.00214801	0.0375511	118	177	68	66	3.37498	4.41323	1.84123	1.97355
E2f7	-1.08866	2.24e-07	1.21e-05	485	483	240	209	4.69039	4.07201	2.1973	2.11314
Tmem238	-1.09232	0.0207296	0.199111	69	119	35	50	3.7536	5.64339	1.80251	2.8437
Farsb	-1.07151	4.43e-10	3.91e-08	854	903	457	367	21.4341	19.7574	10.8586	9.63005
Gm40453	-1.08789	0.0240266	0.216081	91	162	36	78	5.33082	8.27296	1.99648	4.77706
Mrps5	-1.06663	1.73e-15	2.85e-13	1796	1962	965	801	71.6076	68.1939	36.4242	33.3887
Dock1	-1.03753	0.0342017	0.269707	78	71	43	29	0.640748	0.508446	0.334404	0.249061
Gm17383	-1.03779	1.12e-09	9.53e-08	706	786	353	360	25.842	25.0806	12.2322	13.7765
Ak4	-1.02503	0.00690701	0.0919313	154	169	103	54	1.71434	1.64005	1.08549	0.62847
Gprc5b	-1.0202	0.0213038	0.202724	103	136	79	37	1.30143	1.49801	0.944976	0.488764
Hist1h2bj	-1.02317	0.0224303	0.208439	83	103	56	34	11.0617	11.9667	7.0655	4.73737
Nsg1	-1.03367	0.00985505	0.119871	128	190	54	96	3.37095	4.36204	1.34631	2.64318
Gm7232	-1.01119	0.0375202	0.285763	92	66	39	39	2.50002	1.56349	1.0033	1.10799
Aimp1	-0.998544	5.99e-12	6.69e-10	1255	1589	759	635	63.9518	70.5873	36.6152	33.8296
Tsn	-0.99776	3.54e-17	6.9e-15	2290	2607	1288	1121	43.0689	42.7428	22.9327	22.0419
Ptges2	-0.99451	1.33e-05	0.000486151	335	452	209	177	9.81222	11.5413	5.79534	5.42013
Gm3571	-0.98724	0.000328655	0.00779445	218	269	136	105	10.7171	11.5284	6.32953	5.39667
LOC105247253	-0.995806	0.0444419	0.319466	66	77	29	41	8.13257	8.2712	3.38293	5.2818
Prdm5	-0.965483	0.0116192	0.133436	122	115	66	54	1.87861	1.54372	0.962125	0.86933
Ndufs5	-0.964368	0.00163961	0.0299511	171	255	100	112	19.2079	24.97	10.634	13.1527
Vdac2	-0.954663	3.57e-14	4.99e-12	4718	5584	2957	2267	162.304	167.46	96.3014	81.5336
Ufm1	-0.956206	6.14e-09	4.49e-07	776	959	425	449	9.11596	9.82094	4.7265	5.51444
Ptpdc1	-0.926223	0.031354	0.256107	139	114	88	45	1.72917	1.23629	1.03637	0.58526
Gm12816	-0.939892	4.37e-08	2.75e-06	672	796	365	384	29.9698	30.9472	15.4105	17.9044
Gm15459	-0.925095	1.22e-18	3e-16	18012	21395	9684	10609	488.764	506.108	248.773	300.972
Zdhhc2	-0.916036	0.0410848	0.303417	85	81	49	38	1.54378	1.28247	0.842507	0.721548
1700001O22Rik	-0.9116	0.0294833	0.247528	90	113	64	42	2.78447	3.0477	1.87452	1.35851
Cox7a2l	-0.908335	1.69e-16	3.02e-14	3030	3630	1726	1747	150.773	157.464	81.308	90.8843
Nusap1	-0.901567	2.06e-10	1.91e-08	4246	4947	2141	2666	82.0144	83.3002	39.1505	53.8375
Mrpl11	-0.892285	1.62e-07	9.23e-06	796	1005	531	420	14.8777	16.375	9.39566	8.20703
Sf3b3	-0.88672	1.07e-17	2.26e-15	12334	13455	7483	6249	114.945	109.311	66.0197	60.8852
Sart3	-0.879682	3.15e-14	4.45e-12	3271	3712	2037	1694	41.578	41.1324	24.5123	22.5118
Ctsl	-0.879877	3.63e-09	2.77e-07	1741	2563	1167	1108	28.3673	36.405	18.0011	18.8744
Wdr92	-0.875049	6.73e-06	0.00026482	463	607	295	275	7.71547	8.81787	4.65386	4.79102
Gm39972	-0.871009	0.00555236	0.0784031	173	308	122	132	4.31364	6.69488	2.87984	3.44101
Fam163b	-0.845	0.000844838	0.0170424	728	792	549	289	14.1287	13.3995	10.0868	5.86383
Gadd45gip1	-0.848958	2.57e-08	1.67e-06	1095	1514	721	691	36.105	43.5184	22.506	23.8202
Tsc22d3	-0.850569	1.69e-09	1.39e-07	2209	2809	1255	1458	49.1625	54.4984	26.4419	33.9242
Spire2	-0.849034	0.0448816	0.320943	78	105	47	52	1.91153	2.24321	1.09042	1.33231
Hadhb	-0.839452	1.32e-05	0.00048561	533	568	331	275	5.81343	5.40066	3.41777	3.13582
Cd8a	-0.832521	4.5e-08	2.82e-06	1183	1665	795	763	21.6094	26.5134	13.7479	14.5712
Gm8355	-0.82758	4.66e-05	0.00142968	443	464	262	241	12.0439	10.997	6.74333	6.85005
Gm2223	-0.813938	0.0343254	0.270313	140	111	79	63	2.28698	1.5807	1.22172	1.07594
Ptms	-0.805598	0.000449692	0.0100812	482	635	380	247	23.8598	27.4023	17.808	12.7829
1110032F04Rik	-0.814885	0.0383673	0.290772	92	119	55	62	2.04036	2.3007	1.15476	1.43756
Rpl21-ps8	-0.801834	0.00011107	0.00302549	422	558	304	246	44.109	50.8443	30.0814	26.8821
Fam174b	-0.802804	0.0454541	0.323712	96	99	56	54	2.04957	1.84255	1.13185	1.20531
Rbks	-0.787024	0.0295382	0.247528	109	134	74	64	4.66119	4.99539	2.9958	2.86131
Prc1	-0.788512	3.11e-14	4.44e-12	3839	4193	2336	2233	71.7062	68.2743	41.3068	43.6055
Eif2s3x	-0.783368	4.16e-05	0.00128998	1216	1043	737	567	19.3823	14.4927	11.1211	9.44861
Neto2	-0.784433	0.00650204	0.0872979	179	219	111	115	1.76788	1.88554	1.03784	1.18744
Ndc1	-0.780005	5.67e-10	4.94e-08	1919	2021	1190	1069	24.5015	22.4946	14.3839	14.2695
Gm14150	-0.776782	0.0024022	0.0407611	232	306	164	143	8.53021	9.80814	5.70855	5.49695
LOC102634968	-0.77708	0.0211748	0.201854	156	164	79	104	6.44452	5.90614	3.08961	4.49173
Ncln	-0.768728	6.61e-12	7.31e-10	2482	2957	1650	1480	44.2354	45.9423	27.8395	27.5768
Pdlim4	-0.74379	0.0447637	0.320468	128	165	109	63	6.17581	6.94003	4.97875	3.17789
Fam184a	-0.739382	0.0476529	0.331492	125	146	100	60	1.13208	1.15269	0.857386	0.568109
D17H6S56E-5	-0.746549	0.0385649	0.291738	105	155	81	70	0.980934	1.26234	0.716384	0.683696
Ctdspl	-0.750064	0.000295298	0.00712718	456	483	258	290	5.63466	5.20288	3.01809	3.7464
Ice1	-0.74381	5.84e-09	4.3e-07	2031	2120	1202	1235	15.1298	13.7674	8.47693	9.61844
Rbm44	-0.728723	0.0368004	0.282886	130	139	91	69	1.90875	1.77916	1.2649	1.05918
Ldlrad3	-0.732511	0.0410978	0.303417	137	152	70	100	2.0033	1.93759	0.969022	1.52876
Rpl3-ps2	-0.724873	7.86e-05	0.00224507	570	630	342	370	24.8964	23.9881	14.1416	16.8958
Rpl7-ps7	-0.709264	0.0127892	0.143353	238	287	193	123	15.6229	16.4233	11.9937	8.44118
Samd1	-0.715168	2.14e-12	2.48e-10	3563	4068	2364	2198	98.3644	97.9031	61.7845	63.4401
Eepd1	-0.708238	0.00943251	0.116359	199	234	138	122	4.25654	4.36328	2.79443	2.7282
H2afx	-0.704705	1.17e-08	8.18e-07	6330	7810	4810	3704	265.528	285.595	191.012	162.439
Rbbp5	-0.686401	1.75e-07	9.91e-06	1643	1711	1028	1022	14.4297	13.0998	8.54721	9.38396
Tmem234	-0.688717	0.000769221	0.0157761	578	844	389	467	20.2493	25.7762	12.9015	17.1046
Gm9234	-0.682481	0.019148	0.189247	168	206	114	114	12.8242	13.7082	8.23826	9.09786
Narf	-0.686374	0.000142769	0.00378	1112	1245	620	812	14.4102	14.0647	7.60621	11.0011
Fdps	-0.670573	0.00053328	0.0116951	1719	2197	1505	914	67.271	74.9507	55.7569	37.3949
Dip2c	-0.676657	0.0060896	0.0833271	307	289	187	181	2.13327	1.75065	1.23015	1.31492
Eno1b	-0.673283	0.000253177	0.00623631	535	692	409	344	17.3995	19.6193	12.5926	11.6965
LOC105243289	-0.665807	0.0380507	0.288908	133	181	96	97	5.90388	7.0042	4.0343	4.50165
Ube2c	-0.663224	1.52e-11	1.61e-09	4405	5246	3047	2923	270.519	280.85	177.148	187.67
Gorab	-0.655494	0.0167183	0.172926	248	271	193	132	5.28092	5.03061	3.89068	2.93864
Eno1	-0.660902	1.08e-08	7.72e-07	2034	2429	1450	1317	65.4066	68.0913	44.1417	44.2762
Trap1	-0.646245	5.55e-08	3.44e-06	5138	5811	3851	3033	118.262	116.599	83.914	72.9856
Asap2	-0.649057	0.0424718	0.309832	135	187	97	103	1.3269	1.60228	0.902579	1.05841
Tdrkh	-0.642591	4.85e-05	0.00147474	789	890	570	487	7.63811	7.51091	5.22389	4.92892
Atp5l2-ps	-0.635983	0.0376802	0.286626	149	216	123	106	18.8473	23.8183	14.7292	14.0179
Gm10221	-0.630465	0.00265084	0.0441867	542	848	490	384	68.2567	93.097	58.4188	50.5582
Gm6560	-0.62383	0.0280265	0.240269	260	381	252	155	6.81585	8.70693	6.25399	4.24807
Gm12346	-0.621176	0.00360798	0.0559743	712	714	555	363	15.9016	13.9013	11.7345	8.47584
Aurka	-0.627323	3.29e-07	1.73e-05	2536	2702	1615	1715	73.4149	68.189	44.2607	51.9055
Fars2	-0.625916	0.00192881	0.0344411	432	457	278	288	13.0271	12.0136	7.93631	9.07967
Iqgap3	-0.617252	1.33e-05	0.000487317	1295	1433	962	788	13.0446	12.5834	9.17371	8.29851
Fam64a	-0.617966	7.19e-05	0.00210486	768	972	575	534	29.9522	33.0467	21.2298	21.7733
Acsl3	-0.615576	3.08e-05	0.0009866	1016	1087	722	629	14.7061	13.716	9.89356	9.51852
Gm9825	-0.613902	3.1e-07	1.65e-05	3277	4454	2531	2396	115.299	136.613	84.3046	88.1352
Myo1c	-0.614419	1.04e-06	4.95e-05	1616	1798	1086	1102	17.3738	16.8514	11.0533	12.3865
Fam58b	-0.614201	0.00729709	0.0960823	315	440	229	251	14.714	17.9171	10.1267	12.2577
Eif4enif1	-0.60948	6.24e-09	4.53e-07	3549	3962	2558	2280	47.2658	45.9991	32.2517	31.7461
E2f2	-0.607644	3.56e-08	2.27e-06	6535	7435	4975	4041	76.8955	76.2658	55.419	49.7116
Stmn1-rs2	-0.608398	0.04574	0.324619	148	195	118	102	8.69663	9.9889	6.5642	6.26619
Hsp90aa1	-0.605199	5.68e-06	0.00022732	30147	31953	23451	16870	604.785	558.808	445.378	353.823
Ttk	-0.608163	1.86e-05	0.000645818	1024	1131	700	688	19.8935	19.1544	12.8742	13.9738
Depdc1a	-0.614466	0.00592615	0.0818637	578	683	331	472	9.94488	10.2444	5.39151	8.49039
Tpi1	-0.60485	2.43e-08	1.59e-06	8412	10843	6702	5687	300.407	337.562	226.582	212.328
Polr2e	-0.602002	1.34e-05	0.000487317	1859	2400	1529	1219	105.444	118.672	82.1031	72.2868
Bckdha	-0.608973	0.00505442	0.0725392	722	954	437	630	23.2826	26.8186	13.3409	21.2397
Gm40378	-0.606827	0.00391177	0.0593286	455	548	288	355	24.4496	25.6705	14.6509	19.9436
Cenpf	-0.604733	3.06e-06	0.000128662	3606	3930	2251	2606	18.5239	17.5992	10.9469	13.9957
Ccnf	-0.606191	0.000396938	0.00911474	2154	2436	1247	1698	39.1213	38.569	21.441	32.2418
Lockd	-0.59057	0.00998663	0.120992	413	537	370	249	38.9012	44.0942	32.9933	24.5204
Sgol1	-0.597055	2.6e-06	0.000113094	1748	1867	1164	1184	27.5851	25.6845	17.3899	19.5344
Cdc20	-0.593599	2.56e-09	2.04e-07	3988	4748	2947	2727	127.809	132.651	89.4124	91.3706
Plk1	-0.590414	7e-10	6.06e-08	4838	5564	3482	3295	124.937	125.258	85.1263	88.9598
Chd3os	-0.59161	0.0243519	0.218049	218	248	146	157	7.0062	6.94819	4.44211	5.27521
Rpl21-ps15	-0.586941	2.87e-05	0.000933678	1293	1749	1016	960	5.50664	6.49339	4.0963	4.27438
Syt13	-0.582763	2.9e-06	0.000123764	2666	2672	1752	1758	40.6364	35.5046	25.2813	28.0148
Ccdc92	-0.576952	0.0207179	0.199111	297	278	204	177	7.52696	6.14188	4.89445	4.68976
Stip1	-0.576918	2.1e-07	1.16e-05	14732	15690	11133	8974	387.618	359.881	277.31	246.855
Chordc1	-0.579594	2.53e-05	0.000837706	3149	3131	1937	2196	81.6519	70.7734	47.5481	59.5305
Hyls1	-0.577589	0.0241272	0.216667	216	266	159	157	7.51655	8.06937	5.23808	5.71187
Pcna-ps2	-0.570687	0.0215859	0.204174	279	317	228	167	12.6802	12.5596	9.80995	7.93509
Nuf2	-0.577057	2.88e-05	0.000935458	1614	1819	1063	1191	38.3699	37.6976	23.9238	29.6014
Xrcc1	-0.572117	8.92e-08	5.25e-06	2658	3153	1983	1848	44.0109	45.5117	31.0841	31.9905
Ccnb1	-0.574794	6.37e-06	0.000252502	2342	2659	1556	1732	57.8163	57.2237	36.365	44.7018
Sipa1l2	-0.566514	0.0263819	0.230186	231	268	182	149	1.95606	1.97833	1.45899	1.31908
Fnbp1l	-0.567264	0.0347339	0.27283	231	224	159	144	2.45626	2.07637	1.60055	1.60081
E2f8	-0.566251	2.99e-07	1.6e-05	4698	4905	3420	2971	72.7731	66.2355	50.1527	48.1144
Top2a	-0.567051	7.95e-09	5.72e-07	27454	28112	19287	17676	300.128	267.908	199.607	202.022
Aurkb	-0.565712	2.4e-08	1.58e-06	3584	4051	2579	2483	97.8106	96.3771	66.6315	70.8449
Esco2	-0.560694	2.82e-06	0.000120847	1695	1910	1229	1170	33.429	32.8383	22.9465	24.1242
Hmmr	-0.560639	1.32e-06	6.11e-05	2322	2475	1631	1567	33.8154	31.4211	22.4862	23.858
Tubb2a	-0.553785	0.00403206	0.0608525	1217	1530	1128	712	43.2989	47.4538	37.9932	26.4838
Upf2	-0.55714	7.79e-06	0.000301938	1776	1896	1296	1160	18.8739	17.5652	13.0387	12.8882
Kif11	-0.553292	4.27e-08	2.7e-06	7333	7720	5074	5014	87.0015	79.8466	56.991	62.1933
Rpl3-ps1	-0.551028	2.91e-07	1.56e-05	11286	15141	8844	8743	488.842	571.711	362.65	395.916
Rfx2	-0.546171	0.00126808	0.0243031	755	764	553	473	12.8741	11.3568	8.92697	8.43225
Fbxo5	-0.547409	1.33e-06	6.11e-05	2030	2362	1517	1430	64.2303	65.1505	45.4402	47.3036
Cenpi	-0.54277	0.00134138	0.0254697	600	668	445	410	9.29162	9.01801	6.52395	6.63802
Bmp7	-0.54128	8.53e-05	0.00242082	1111	1383	886	792	17.3081	18.7824	13.0671	12.8996
Hspa8	-0.540772	5.04e-07	2.58e-05	50057	50196	36710	31327	1360.26	1189.1	944.389	889.998
Mif4gd	-0.540479	0.000961614	0.0190847	632	739	471	453	21.8202	22.2423	15.3948	16.3514
Kif22	-0.539546	3.18e-07	1.68e-05	2862	3336	2186	1997	74.3112	75.51	53.7335	54.2097
Stam	-0.540105	0.000509926	0.0112468	751	840	546	528	11.6363	11.3462	8.00901	8.5531
Kif18b	-0.538656	9.95e-07	4.78e-05	2437	2772	1848	1673	38.8984	38.5712	27.9247	27.9181
Zfp36l2	-0.537	1.99e-07	1.12e-05	17623	21494	12671	13671	284.87	302.885	193.905	231.037
Fam222b	-0.53084	0.0211801	0.201854	296	312	214	200	4.11868	3.78455	2.81897	2.90944
Mis18bp1	-0.53477	0.000689495	0.0145291	1333	1453	856	1028	18.9728	18.0285	11.5341	15.297
BC052040	-0.526955	0.00787995	0.101367	463	492	360	293	8.70496	8.06389	6.40765	5.75927
Bckdhb	-0.530998	0.0473689	0.330424	194	267	155	156	7.46423	8.95547	5.6458	6.27512
Cdca2	-0.530066	2.66e-05	0.000868247	1592	1784	1131	1162	12.8127	12.5166	8.61732	9.77731
Cdk1	-0.528558	8.4e-07	4.08e-05	2740	3293	2073	2022	54.7755	57.3881	39.2325	42.2602
Kcnh2	-0.514968	0.00216795	0.0377241	649	844	548	474	8.79086	9.96605	7.02712	6.71242
5031439G07Rik	-0.511193	0.0155206	0.164691	367	468	319	255	4.16992	4.63555	3.43133	3.02911
Rbm15	-0.512801	7.58e-05	0.00217975	1274	1494	1001	902	3.64001	3.72115	2.70756	2.69435
Ahsa1	-0.510775	1.12e-06	5.3e-05	5958	6304	4521	3955	252.892	233.262	181.668	175.507
Gpc1	-0.507294	0.0166988	0.172926	409	436	330	256	4.84951	4.50666	3.70424	3.17343
Ly6k	-0.507651	0.028598	0.242797	273	321	220	190	20.1923	20.6977	15.4048	14.6923
Rmnd5a	-0.512131	2.53e-05	0.000837706	7254	7749	4810	5509	67.2739	62.6482	42.2303	53.4141
Ube2t	-0.510371	0.0045893	0.0673591	511	645	392	401	25.7638	28.3493	18.7105	21.1372
Bub1	-0.505936	1.25e-05	0.000461974	2268	2537	1778	1548	29.8989	29.1559	22.1899	21.3352
Tpx2	-0.506343	8.54e-08	5.12e-06	6609	7265	4977	4622	86.5672	82.9559	61.7157	63.2939
LOC108168376	-0.510556	0.0339588	0.268978	414	517	262	374	8.35813	9.09899	5.00749	7.89395
Kif2c	-0.506724	0.000482977	0.0107294	1896	2042	1247	1470	36.8717	34.6182	22.9579	29.8873
Ncapg	-0.505171	0.00015659	0.00407494	2148	2416	1471	1678	33.21	32.5631	21.5307	27.1232
Cdca8	-0.500502	2.92e-06	0.000124313	3453	4088	2803	2427	121.417	125.31	93.3072	89.2206
Gm4735	-0.500863	0.0183163	0.184288	343	467	297	262	11.6801	13.8632	9.57455	9.32753
Ncs1	-0.504968	0.0341593	0.269696	343	362	216	271	4.09327	3.76598	2.44028	3.38111
Cdca3	-0.497911	2.61e-06	0.000113094	3832	4680	3152	2755	95.382	101.55	74.2741	71.693
Bub1b	-0.496477	3.23e-07	1.7e-05	7483	7968	5558	5216	116.26	107.919	81.7491	84.7239
Gm3756	-0.493176	0.0100526	0.121551	484	598	421	333	17.716	19.0817	14.5886	12.7432
Kif23	-0.492521	3.68e-05	0.0011518	3169	3526	2583	2100	52.0799	50.5154	40.1867	36.0812
Tubb4b	-0.487863	7.82e-05	0.00224444	8236	10272	7336	5612	294.306	319.986	248.171	209.659
Bmyc	-0.494493	0.0464649	0.326742	254	290	176	202	17.2269	17.1461	11.3005	14.3232
Nsdhl	-0.486951	0.0089182	0.111455	584	706	515	389	15.0541	15.865	12.5678	10.4834
Gm13443	-0.491689	0.0333776	0.266902	278	393	237	228	24.4531	30.1353	19.7355	20.9671
Gm5558	-0.487762	0.000915663	0.0182316	932	1121	776	660	72.0089	75.504	56.76	53.3124
Incenp	-0.489803	1.41e-07	8.13e-06	7973	8868	5934	5838	140.782	136.504	99.1935	107.771
Nt5dc2	-0.48591	9.49e-06	0.000363135	5010	5964	4214	3478	136.727	141.889	108.874	99.2343
Lrrc42	-0.483881	0.000229345	0.0057383	1659	1857	1357	1116	54.0162	52.7088	41.8281	37.9888
Lss	-0.48198	0.00491554	0.0708772	791	1042	725	560	7.14568	8.20594	6.20034	5.28894
Gm5620	-0.483019	0.00543885	0.0772443	564	650	459	394	20.5391	20.6352	15.8243	15.0007
Nek2	-0.48202	0.000153388	0.00400929	1512	1619	1148	1057	25.6674	23.9591	18.4494	18.7594
Snrpa1	-0.477789	0.00121397	0.0233026	2237	2713	2025	1468	102.319	108.177	87.6854	70.1992
Pfkl	-0.479784	7.11e-05	0.00208892	2588	3199	2225	1843	39.7869	42.873	32.3829	29.6221
Ckap2l	-0.483283	4.4e-05	0.0013559	2798	2946	1983	2055	50.705	46.5403	34.0201	38.934
Kif20a	-0.480409	1.86e-06	8.43e-05	4140	4579	3215	2927	66.1364	63.7683	48.6219	48.8852
Acot7	-0.47728	9.64e-05	0.00269723	4918	5406	4106	3200	186.833	179.034	147.671	127.095
Atp5l	-0.478067	0.0489879	0.336521	299	482	298	247	33.3239	46.8301	31.4421	28.7803
Cdc73	-0.474924	0.00057416	0.0123747	1304	1389	1028	880	10.486	9.73707	7.82593	7.39825
Ube2s	-0.46987	0.00209654	0.0368469	2519	3208	2375	1683	145.772	161.835	130.113	101.822
Fzr1	-0.475366	8.94e-05	0.00252927	1889	2357	1481	1504	47.916	52.1196	35.5642	39.885
Fabp5	-0.469515	0.00118028	0.0227983	1613	2198	1486	1204	96.7706	114.956	84.3992	75.5179
Hmgb1-ps6	-0.468006	0.029746	0.248592	351	460	320	254	32.6844	37.3409	28.2094	24.7276
Rdh10	-0.466898	0.0484536	0.334889	274	330	240	189	6.82606	7.16683	5.66032	4.92261
Ssx2ip	-0.462572	0.015644	0.165393	563	613	479	362	8.69274	8.25092	7.00155	5.84347
Arhgap11a	-0.466177	0.000162678	0.00419853	1977	2046	1456	1410	22.5302	20.3263	15.7083	16.7993
Cenpl	-0.467603	0.00896453	0.111806	513	643	403	414	12.0256	13.14	8.94346	10.1462
Idi1	-0.462792	0.035982	0.278187	316	391	278	225	6.30175	6.79743	5.24843	4.69106
Kif24	-0.468748	0.0142546	0.154909	632	657	416	498	6.45485	5.84963	4.02229	5.31756
Spag5	-0.464599	3.63e-05	0.00113937	2762	2913	2077	1969	32.149	29.5582	22.8871	23.9609
Kif18a	-0.466359	0.00332647	0.052798	764	923	576	618	12.9657	13.6552	9.25409	10.9649
Rorc	-0.468747	0.00441381	0.0653297	1851	2140	1219	1597	32.5631	32.8191	20.3017	29.3723
Cdca5	-0.458472	0.00362227	0.0559743	2031	2206	1787	1256	60.9241	57.6871	50.7474	39.3897
Bub3	-0.462095	1.28e-06	5.96e-05	5005	5944	4034	3756	134.095	138.829	102.318	105.208
Proser1	-0.456936	0.00292241	0.0478054	1568	1609	1300	986	20.7474	18.5596	16.2844	13.6398
Cenpn	-0.457895	0.00105775	0.0207912	1293	1485	1097	891	41.8137	41.8639	33.5843	30.1239
Ppa2	-0.45837	0.00740073	0.0969662	641	669	499	440	26.4995	24.1101	19.5295	19.0172
Hspa9	-0.456862	5.38e-05	0.0016133	13053	14923	11240	8812	245.251	244.427	199.929	173.097
Kif4	-0.45891	6.03e-05	0.00180156	2343	2517	1816	1662	28.0251	26.2453	20.5637	20.7835
1700025G04Rik	-0.456048	0.0134967	0.149294	461	520	362	340	2.70222	2.65715	2.00881	2.08359
Foxm1	-0.454117	6.4e-05	0.00190312	4643	4974	3782	3134	60.8158	56.7959	46.8975	42.9171
Gatc	-0.459128	0.00961467	0.117763	690	791	484	570	22.2006	22.1863	14.7425	19.1736
Gm8203	-0.452229	0.00916305	0.114051	597	749	528	436	38.4816	42.0876	32.2198	29.3818
Ccng2	-0.452055	0.00205578	0.0363384	877	965	685	638	20.1051	19.2853	14.8664	15.2912
Oip5	-0.454252	0.0476422	0.331492	277	350	217	230	10.1717	11.2041	7.54368	8.82989
Gm6061	-0.448813	0.00333343	0.0528402	936	1192	838	689	73.0086	81.0528	61.8803	56.1864
Kif14	-0.451438	0.00266963	0.0444395	1395	1339	969	1002	9.56565	8.00414	6.29034	7.18327
Shcbp1	-0.445889	0.000532186	0.0116951	1308	1534	1084	963	35.077	35.862	27.5204	26.9995
Tacc3	-0.444629	1.5e-05	0.000537053	4188	4621	3372	2992	71.5835	68.855	54.5637	53.4665
Rad21	-0.442601	1.77e-05	0.000621075	13211	13924	10623	9053	209.523	192.511	159.498	150.108
Rpl30	-0.442982	0.000375558	0.0087216	2513	3437	2189	2079	248.58	296.379	204.989	215.002
LOC108168067	-0.441222	4.75e-05	0.00145104	3151	3455	2542	2243	99.7546	95.3512	76.1851	74.2382
Igsf8	-0.440223	0.0011361	0.0220489	1191	1444	1022	882	29.8661	31.5666	24.2621	23.1233
Rars	-0.437712	1.68e-05	0.000589808	3558	4086	2913	2627	95.4607	95.5676	73.9894	73.6873
Tyms	-0.437122	1.05e-05	0.000395896	3781	4434	3091	2859	42.986	43.945	33.2682	33.982
Pes1	-0.435162	5.21e-05	0.00156467	4354	5109	3733	3139	85.5162	87.4761	69.411	64.4563
Ctnna1	-0.437554	0.0191913	0.189394	660	615	460	469	10.2653	8.33864	6.77321	7.62629
Ahsa2	-0.43931	0.0108174	0.12778	773	816	536	614	11.8934	10.9449	7.80731	9.87663
Psmd12	-0.434604	4.76e-05	0.00145104	2612	3085	2157	1976	86.6742	89.2413	67.7606	68.5516
Spc24	-0.431468	0.00169098	0.0306784	1237	1461	1072	892	52.4276	53.9801	43.0126	39.5247
Fads2	-0.429913	0.00133293	0.0253877	2478	2875	2215	1693	93.9511	95.0238	79.5032	67.1076
Gpsm2	-0.430926	0.00462544	0.0677278	747	875	615	565	12.2446	12.5034	9.54357	9.68251
Rpl30-ps10	-0.428042	0.0216929	0.204628	476	617	431	364	58.4014	65.9926	50.0615	46.6908
Arl6ip1	-0.429925	3.5e-05	0.0011066	4148	4575	3155	3200	111.082	106.804	79.986	89.5918
Dpysl2	-0.423875	0.0210463	0.201366	519	599	453	366	6.40759	6.44685	5.29463	4.72414
Gm10232	-0.425352	0.0469373	0.328561	311	380	263	241	24.7995	26.4156	19.854	20.0916
Dlgap5	-0.425192	0.000383734	0.00887791	2173	2403	1633	1710	41.9164	40.4084	29.8209	34.4853
Mastl	-0.418478	0.0358246	0.277468	504	534	436	330	6.19431	5.72133	5.07293	4.24024
Aacs	-0.423137	0.00272213	0.0450692	944	1155	776	756	17.01	18.1429	13.2374	14.2419
Cyp51	-0.415947	0.0186514	0.186887	1334	1601	1300	865	17.5214	18.3315	16.1647	11.878
Mast2	-0.420097	0.000309505	0.00742631	2862	2957	2261	2024	28.0146	25.2325	20.952	20.7128
Hirip3	-0.417884	0.00107333	0.0209841	3363	3701	2934	2275	76.5742	73.4629	63.2449	54.1565
Gm5160	-0.419244	0.00617713	0.0841309	788	926	677	581	64.732	66.3128	52.6492	49.898
Maged1	-0.419641	0.00856028	0.107755	729	780	586	524	15.1454	14.1267	11.5255	11.3815
Pcna	-0.416535	0.000447655	0.0100538	17122	20935	15846	12147	776.937	828.129	680.709	576.255
Asf1b	-0.417762	6.82e-05	0.00201819	2903	3266	2359	2176	103.801	101.804	79.8531	81.3442
Sqle	-0.414909	0.00384198	0.058778	1464	1852	1365	1073	30.4598	33.5908	26.8861	23.3399
Anxa2	-0.418006	4.18e-06	0.000170483	7026	8141	5685	5446	231.398	233.735	177.253	187.518
Ncapd2	-0.416842	2.56e-06	0.000112127	16041	17892	13130	11848	196.979	191.532	152.639	152.107
Cenpk	-0.418721	0.0296767	0.248181	442	566	354	382	15.3344	17.1181	11.6268	13.8555
Cit	-0.414974	0.0013457	0.0255121	1509	1578	1182	1097	9.81863	8.95081	7.28097	7.46246
Spc25	-0.41393	0.00200395	0.0355245	1098	1331	930	856	34.0073	35.937	27.2687	27.7178
Terf1	-0.418023	0.0378849	0.288005	472	607	358	429	11.8987	13.3396	8.54383	11.3066
Melk	-0.413389	0.00336027	0.0531971	931	1063	754	715	18.2668	18.1819	14.0054	14.6667
Stard4	-0.410184	0.00861675	0.108238	842	947	728	596	9.08147	8.90406	7.43337	6.72055
Atp5k	-0.409911	0.0169779	0.174978	1019	1503	1034	817	199.523	256.55	191.668	167.246
Scd2	-0.410541	0.000280041	0.00679902	12473	13930	9128	10329	130.779	127.324	90.6051	113.224
Birc5	-0.405142	0.000163117	0.00420103	3165	3718	2730	2371	52.9734	54.2485	43.2571	41.4887
Smtn	-0.401353	0.0337934	0.268324	753	786	673	478	11.5546	10.5142	9.77653	7.66834
Nrf1	-0.404982	0.00024276	0.0060127	2491	2949	2139	1891	26.0131	26.8464	21.1465	20.6454
Taf5	-0.401972	0.0215891	0.204174	639	760	584	456	11.2138	11.6267	9.70229	8.36623
Snx25	-0.40636	0.0322284	0.261165	488	538	361	398	8.00147	7.69	5.60361	6.82256
Tuba1c	-0.400129	0.00340267	0.0536608	2561	3200	2433	1850	74.0636	80.675	66.6113	55.9347
Calm2	-0.401162	0.000105916	0.00291092	7496	9315	6732	5740	352.45	381.808	299.656	282.159
Ticrr	-0.398569	0.0026384	0.0440391	2985	3338	2683	2041	23.7069	23.1105	20.1726	16.9468
Col27a1	-0.398703	0.0325043	0.26301	490	580	441	356	3.57022	3.684	3.04192	2.71183
Gm4739	-0.395804	0.0082667	0.105025	1684	2073	1613	1191	97.3527	104.472	88.2776	71.9833
l7Rn6	-0.399335	0.0120356	0.137032	678	752	551	514	15.0307	14.5332	11.5641	11.9132
Dhcr24	-0.398389	9.1e-05	0.00256326	3447	4095	2938	2672	48.9276	50.6711	39.4798	39.6518
Tubb5	-0.396464	6.89e-05	0.0020359	10690	11768	9071	7717	115.407	110.752	92.7085	87.0997
Akap12	-0.398901	0.0197205	0.192427	1000	929	695	748	9.15231	7.41208	6.02179	7.15725
Pbk	-0.395411	0.00070407	0.0147997	1769	2008	1466	1353	61.4469	60.8037	48.2077	49.1342
Ncaph	-0.395345	0.000219552	0.00554236	3921	4104	3090	2915	83.1841	75.9005	62.06	64.6541
Ccnb2	-0.392691	8.97e-05	0.00253347	3418	3956	2836	2673	126.815	127.953	99.613	103.684
Blvra	-0.391621	0.0265263	0.231117	494	586	419	388	21.6597	22.3983	17.392	17.7857
Tk1	-0.388385	0.00339595	0.0536238	2418	3162	2319	1854	89.1922	101.678	80.9807	71.498
Gprasp1	-0.390625	0.0115271	0.132718	957	951	726	708	9.3086	8.06393	6.68528	7.19979
Vegfb	-0.389666	0.00778281	0.100433	828	953	695	639	36.927	37.0511	29.3433	29.794
Alkbh5	-0.387055	0.00323943	0.0516837	3634	3693	3097	2437	34.485	30.5505	27.8225	24.1777
Pja1	-0.387534	0.0084806	0.107075	964	1085	839	701	18.4582	18.1107	15.2084	14.0328
C330027C09Rik	-0.384496	0.000497168	0.0109851	2293	2593	1854	1818	32.9897	32.5215	25.2519	27.3453
Pkm	-0.380701	0.000988117	0.0195475	26050	34401	25147	20279	612.416	705.023	559.674	498.424
Arhgap19	-0.380848	0.00121109	0.0232836	2558	2642	2062	1872	28.4538	25.6192	21.7139	21.77
Kif15	-0.381212	0.000548549	0.0119485	3454	3586	2753	2569	40.1139	36.3058	30.2684	31.1925
Spdl1	-0.382076	0.00687522	0.0916074	995	1162	797	824	19.7805	20.1378	14.9997	17.1259
ND5	-0.377435	0.000388092	0.00896187	107422	113144	92150	75292	3367.21	3091.74	2734.53	2467.4
Urod	-0.380375	0.012385	0.140101	768	942	640	645	29.4896	31.532	23.2647	25.8929
Lrrc41	-0.381556	0.0179322	0.181016	929	1067	692	807	16.9643	16.9855	11.9629	15.4066
Fam162a	-0.376628	0.0115164	0.132718	876	1115	803	698	78.8737	87.5179	68.447	65.7049
Sdhb	-0.374269	0.00245007	0.041345	3271	3988	3068	2428	174.132	185.075	154.619	135.133
Tmem194	-0.376695	0.0241397	0.216667	1210	1144	836	950	11.5283	9.50163	7.54041	9.46272
Khdrbs1	-0.374926	0.00823715	0.104864	1351	1797	1144	1222	6.49207	7.52783	5.20433	6.13922
Cdc25b	-0.372175	0.00087077	0.017496	2111	2384	1774	1636	34.7825	34.2431	27.6717	28.1819
St13	-0.369275	0.0015587	0.0288383	6362	6538	5410	4445	224.256	200.905	180.534	163.809
Ldha	-0.367177	0.000725526	0.0151841	20244	26124	19263	15925	637.357	717.001	574.144	524.179
Trim59	-0.371875	0.00389319	0.0591197	2321	2530	1738	1938	27.7445	26.3643	19.6681	24.2197
Pif1	-0.369494	0.0217038	0.204628	698	800	552	584	8.82135	8.8138	6.60433	7.71625
Tpm1	-0.366769	0.0247576	0.220237	636	701	513	505	9.41802	9.04928	7.19167	7.81822
Cyb5a	-0.368504	0.0022047	0.0382553	2706	3167	2123	2328	206.561	210.747	153.42	185.788
Acat2	-0.365785	0.0157801	0.166117	770	975	674	650	21.2063	23.4085	17.573	18.7155
Ikzf3	-0.36479	0.00144461	0.0271361	3092	3172	2431	2358	32.5568	29.1158	24.2325	25.9573
Tpst1	-0.36227	0.0307682	0.252835	600	742	551	472	16.7014	18.0053	14.5199	13.7359
Ska3	-0.36398	0.0152357	0.162253	825	892	667	644	20.6338	19.4484	15.7929	16.8394
Pak1	-0.363194	0.0202952	0.196735	727	786	591	565	13.3867	12.617	10.3024	10.8768
Arhgef39	-0.364266	0.0380768	0.288927	537	625	430	454	13.0539	13.2446	9.89563	11.5381
Cacybp	-0.360009	0.00082453	0.0167151	5425	5973	4760	3980	146.653	140.76	121.817	112.483
Ngfrap1	-0.359298	0.00774557	0.100057	1878	2508	1829	1514	114.471	133.266	105.542	96.4804
Nr3c1	-0.366433	0.0157428	0.166069	5264	5655	3592	4699	44.3641	41.5473	28.6591	41.4034
Oat	-0.356019	0.0311113	0.254632	1635	1908	1618	1108	43.3783	44.1293	40.6391	30.7333
Gm6793	-0.356085	0.0418765	0.306953	1062	1059	948	691	37.8549	32.9069	31.9902	25.7507
Sgol2a	-0.362015	0.0247877	0.220345	993	983	725	788	10.6839	9.21993	7.38463	8.86382
Gm37416	-0.364871	0.0306981	0.252597	5017	6134	3486	4942	118.286	126.075	77.8087	121.817
Pbdc1	-0.357044	0.00621199	0.0844184	1708	1771	1436	1241	36.9063	33.3599	29.3749	28.0348
Nudc	-0.355341	0.00329362	0.0524121	5457	6552	5190	4030	231.627	242.439	208.551	178.835
Slfn9	-0.360975	0.0103004	0.123695	1389	1503	1050	1159	13.7706	12.9899	9.85489	12.0129
Nasp	-0.353015	0.00589755	0.0817083	5728	7179	5642	4272	106.089	115.911	98.9256	82.72
Ect2	-0.355223	0.00159079	0.0292558	2420	2596	1969	1886	33.3564	31.1933	25.6933	27.1781
Hcfc1	-0.353281	0.00190533	0.0341707	18979	18591	15682	13377	119.915	102.4	93.8023	88.3638
Ubqln2	-0.355331	0.00711207	0.0941507	1556	1604	1211	1219	26.7077	24.0008	19.678	21.8749
Mad1l1	-0.352144	0.00249439	0.0419557	1843	2123	1611	1439	39.7933	39.9602	32.9299	32.4832
Fen1	-0.353693	0.000759391	0.0156529	3443	4238	2949	2930	82.3992	88.418	66.8145	73.3107
Plcxd2	-0.353892	0.0369949	0.283505	701	714	532	557	5.46263	4.85038	3.92469	4.53788
ND4	-0.351476	3.57e-05	0.00112327	49433	56558	43013	38558	2051.02	2045.69	1689.52	1672.56
Nfatc3	-0.350933	0.000839878	0.0169702	9154	9464	7695	6696	85.2819	76.8625	67.868	65.2192
Nsmce1	-0.350706	0.0303397	0.251495	683	898	643	569	36.6324	41.987	32.6487	31.9059
Nde1	-0.3531	0.00280721	0.0462906	2775	3105	2169	2343	65.6974	64.0826	48.6133	57.9924
Naa38	-0.349448	0.0386263	0.291835	556	678	501	448	61.3687	65.2373	52.3504	51.6969
Sf3b5	-0.347382	0.0184788	0.185412	1251	1651	1236	996	97.4458	112.111	91.1454	81.1109
Aimp2	-0.349812	0.00530695	0.0756332	1309	1509	1115	1054	63.1573	63.4697	50.9294	53.1665
Cks2	-0.347253	0.0246373	0.21943	906	1162	877	715	74.6399	83.4531	68.3994	61.5833
Gm5518	-0.344016	0.00741861	0.0970581	2029	2774	1929	1763	91.8503	109.471	82.6687	83.4382
Dntt	-0.343623	0.000108244	0.00296826	22488	24890	19366	17339	603.633	582.426	492.122	486.587
Itpr2	-0.345925	0.0390119	0.292854	704	730	540	569	3.40416	3.07719	2.47196	2.8765
Hjurp	-0.341826	0.00129495	0.024741	7571	8144	6642	5571	51.2937	48.0997	42.601	39.4601
Snrpd2	-0.34217	0.00389267	0.0591197	3051	4019	2919	2533	357.458	410.482	323.763	310.264
Rpl7	-0.342325	0.000274918	0.00671445	24698	30940	22786	20174	1511.88	1651.08	1320.49	1291.1
Caprin1	-0.343051	0.000113502	0.0030849	18390	19940	15257	14448	170.799	161.444	134.148	140.29
Ncoa5	-0.345541	0.0138332	0.151597	2235	2356	1637	1908	31.4741	28.9231	21.824	28.0911
Gm6477	-0.339307	0.0274412	0.237071	1018	1308	1004	797	50.0892	56.1045	46.7671	40.9985
Atg101	-0.339715	0.0421476	0.308204	633	786	600	499	21.9209	23.7286	19.6706	18.0663
Psmd1	-0.340494	0.000284371	0.00688636	5369	6128	4625	4287	94.2782	93.8059	76.8847	78.7019
Espl1	-0.33964	0.00148734	0.027769	3409	3706	2932	2599	27.7805	26.3276	22.6197	22.1428
Ddx39	-0.33725	0.00500353	0.0718928	4715	5818	4569	3610	138.458	148.937	127.019	110.83
Cct3	-0.337596	0.0016191	0.0297318	9560	10856	8767	7123	279.299	276.487	242.478	217.565
Gm9531	-0.335321	0.0155374	0.164691	2498	2975	2442	1822	125.392	130.184	116.047	95.6182
Satb1	-0.342851	0.00710477	0.0941507	17740	20048	13150	15992	112.099	110.437	78.6657	105.649
Dcps	-0.336655	0.00710924	0.0941507	1412	1695	1276	1136	67.6134	70.7557	57.8441	56.8709
Irgq	-0.33595	0.0193712	0.189773	1028	1094	883	772	9.59754	8.90385	7.80437	7.53526
Ccnd3	-0.333723	0.00793769	0.10179	9797	11232	9417	7009	264.341	264.193	240.544	197.716
Rrm1	-0.33526	0.000252612	0.00623631	14734	16535	12967	11393	210.76	206.189	175.597	170.381
Cdca4	-0.33691	0.00344445	0.0541806	2116	2482	1761	1804	49.9922	51.119	39.3873	44.5592
Mrps12	-0.335644	0.0349471	0.273804	689	899	623	606	51.6971	58.8031	44.2533	47.5372
Hspbp1	-0.331636	0.0219919	0.205923	1217	1492	1177	935	42.145	45.042	38.5871	33.8517
Edf1	-0.329959	0.01929	0.18943	2106	2742	2136	1642	179.984	204.285	172.817	146.711
Tmem97	-0.330758	0.0156762	0.165591	1342	1515	1229	1005	57.5605	56.6472	49.9039	45.0663
Mif	-0.329427	0.0101164	0.121962	5320	6929	5384	4164	549.04	623.385	526.027	449.28
Rangap1	-0.328799	0.00582436	0.0810331	6662	7681	6331	4902	101.356	101.872	91.186	77.9709
Poc1a	-0.330086	0.0300406	0.250033	782	904	708	609	26.1465	26.3492	22.4104	21.2881
Stil	-0.328699	0.0118673	0.135568	1538	1610	1315	1154	16.1674	14.7538	13.0864	12.6824
Pola1	-0.326083	0.0170064	0.174978	3849	4234	3662	2695	41.1566	39.4672	37.0698	30.1276
Trappc13	-0.332201	0.0221844	0.207252	1080	1205	851	928	17.3988	16.923	12.9788	15.63
Zw10	-0.328614	0.00546002	0.0774553	1852	2031	1601	1439	36.5632	34.9548	29.923	29.7015
Dbi	-0.326287	0.0237776	0.214596	1588	2096	1609	1267	153.108	176.17	146.863	127.714
Gid4	-0.330592	0.00594883	0.0818637	1849	2097	1512	1564	24.0263	23.7543	18.5999	21.2471
Mcm5	-0.325579	0.00606607	0.0832117	15244	18301	14904	11394	253.289	265.085	234.439	197.928
ND2	-0.324643	0.00554561	0.0783979	80704	86714	74571	57282	4445.29	4163.78	3888.53	3298.66
Cactin	-0.328215	0.00323818	0.0516837	2367	2803	2003	2029	49.6813	51.2875	39.8003	44.5237
Hmbs	-0.324594	0.0304095	0.251495	945	1206	919	763	33.8533	37.6626	31.167	28.5764
Commd1	-0.32533	0.0282013	0.241262	792	985	718	670	30.679	33.2618	26.33	27.1334
Hmga1-rs1	-0.322168	0.0101849	0.122669	3978	5307	3450	3783	142.239	165.423	116.784	141.418

## Sheet: Up FC>1.25
AccID	log2FC	Pvalue	FDR	WT1_count	WT2_count	KO1_count	KO2_count	WT1_RPKM	WT2_RPKM	KO1_RPKM	KO2_RPKM
Mcoln1	0.37937	0.0481348	0.333711	342	402	453	494	9.76219	10.0032	12.2414	14.7422
Slc19a2	0.51981	0.0472613	0.330077	295	337	570	325	4.72318	4.70366	8.63968	5.44013
Sytl2	1.30073	0.0468652	0.328244	33	15	80	40	0.228809	0.0906659	0.525121	0.289956
Ttc14	0.375631	0.0431079	0.311885	753	903	899	1196	4.50905	4.7138	5.09636	7.48747
Xpa	0.510449	0.0408841	0.302932	167	212	250	277	5.69698	6.3046	8.07381	9.8792
Rora	0.878118	0.0404458	0.300409	81	93	224	93	0.42063	0.421009	1.10122	0.504907
Rap1gap2	0.467194	0.0387507	0.292236	376	606	579	733	3.30174	4.63896	4.8133	6.72934
Mapk1ip1	0.582728	0.0386247	0.291835	168	218	232	330	5.93653	6.71543	7.76107	12.1913
Maml3	0.520884	0.0359152	0.277845	159	195	249	248	1.32094	1.41226	1.95838	2.15404
Arhgap23	0.529827	0.0335988	0.267372	255	267	450	295	2.37374	2.16669	3.96566	2.87097
Sidt1	1.07191	0.0333405	0.266893	29	33	68	60	0.350838	0.348029	0.778803	0.758881
Zc3h6	0.61012	0.0324663	0.262919	113	146	209	178	1.31422	1.48026	2.30116	2.16433
Tmem19	0.447631	0.0313909	0.256237	268	338	386	421	4.70167	5.16926	6.41085	7.72172
Myl4	1.63007	0.0309065	0.253462	16	11	60	24	0.545168	0.326736	1.9354	0.85494
Spg11	0.365787	0.0304885	0.25185	430	502	594	583	3.20744	3.26428	4.19456	4.54645
Snapin	0.394566	0.0299114	0.249296	349	429	510	491	10.4143	11.1598	14.4074	15.318
Zfp516	0.827302	0.0290843	0.245568	54	73	112	108	0.282938	0.333437	0.555554	0.59161
Ypel3	0.593202	0.0287569	0.243729	163	255	359	256	8.85037	12.07	18.4535	14.5321
Ccdc62	1.08989	0.0262412	0.229413	27	41	74	67	0.393804	0.521307	1.02178	1.02166
Pitpnc1	0.323604	0.0261259	0.228601	1057	1044	1272	1317	9.41917	8.11021	10.7309	12.2698
Ccdc18	0.35782	0.0245474	0.219316	1236	1483	1508	1892	13.5146	14.1357	15.6097	21.6281
Fam208b	0.394149	0.0245291	0.219316	1130	1086	1268	1595	4.97284	4.16629	5.2827	7.33839
Prrc1	0.536015	0.0237738	0.214596	200	207	284	296	2.23775	2.01904	3.00822	3.46248
Per2	0.543554	0.0232089	0.210889	196	213	326	261	1.89518	1.79543	2.98416	2.63845
Ppp4r1l-ps	0.721835	0.0226689	0.209261	92	98	157	151	1.1778	1.09371	1.9028	2.02104
Mbd6	0.323795	0.0218421	0.204889	1471	1737	2243	1704	19.193	19.7571	27.7057	23.2441
Sema4g	1.09812	0.0214357	0.203472	34	36	69	78	0.413251	0.381444	0.793952	0.991159
Zcchc2	0.374408	0.0203061	0.196735	1758	1699	2579	1860	15.0897	12.7131	20.9568	16.6913
Gyg	0.41562	0.0190045	0.189045	667	756	826	1030	19.8415	19.6049	23.2616	32.0332
Pced1b	0.825	0.0176859	0.179267	72	90	127	153	0.852997	0.929503	1.42439	1.89505
Zfp687	0.455662	0.0171981	0.176065	882	1073	1087	1524	5.56661	5.90358	6.49474	10.0559
Sfxn2	0.528368	0.01711	0.175749	210	245	321	322	3.73689	3.80059	5.40763	5.99047
Dcun1d3	0.698591	0.0167357	0.172926	123	135	185	225	1.21291	1.16052	1.72705	2.31964
Wwox	0.529922	0.0145838	0.157297	228	274	343	366	4.4735	4.68659	6.37114	7.50771
Nckap5	2.97562	0.0145575	0.157152	3	4	50	5	0.0169439	0.0196946	0.267346	0.0295241
Rhbdd1	0.545507	0.013797	0.151471	236	238	344	337	3.65966	3.21736	5.05007	5.46352
Smim14	0.430059	0.0136644	0.150751	413	551	667	602	4.31999	5.02433	6.60494	6.58329
Rgp1	0.358803	0.0127737	0.143311	1138	1238	1398	1589	11.088	10.5154	12.8952	16.1864
Slc35b3	0.623579	0.0111746	0.130494	163	191	260	274	2.41249	2.46436	3.64302	4.23977
Eml2	0.830752	0.0108002	0.1277	82	89	157	142	1.25827	1.19054	2.28071	2.27804
Nfat5	0.401709	0.0094508	0.116359	975	921	1214	1256	4.14678	3.41475	4.88804	5.58482
Unkl	0.510219	0.00917742	0.114114	366	434	640	480	3.03978	3.14228	5.03213	4.16789
Tox	0.38011	0.00684562	0.0913121	1361	1489	1692	1943	20.5153	19.5663	24.1452	30.6201
4933412E12Rik	0.845932	0.00680251	0.0908357	95	105	201	153	3.15056	3.03562	6.31061	5.30482
Rab40c	0.565819	0.00645664	0.0868782	254	293	384	409	5.88902	5.92203	8.42851	9.91394
Abca1	1.59877	0.00613608	0.0837575	23	23	47	89	0.12703	0.110739	0.245746	0.513904
Dennd6b	0.550328	0.006028	0.0828344	269	339	427	443	3.33549	3.66438	5.01239	5.74281
Frmd4a	0.569356	0.00552383	0.07818	670	670	1201	769	4.76454	4.1535	8.08536	5.71724
Itga9	0.867342	0.00482539	0.0699149	116	136	277	176	0.947327	0.968221	2.14157	1.50269
Mapkapk2	0.345052	0.0043566	0.0648738	1253	1450	1783	1587	24.9528	25.1727	33.6148	33.0415
Sars	0.376301	0.0040766	0.0614492	3494	4065	5528	4125	53.9329	54.6998	80.781	66.5685
Mbnl2	0.560201	0.00392014	0.0593821	438	459	586	711	4.27199	3.90268	5.41083	7.25003
Tnks1bp1	0.762304	0.00378458	0.0580444	144	151	270	223	1.29615	1.18485	2.30073	2.09851
Slc12a7	0.370928	0.00376773	0.0578582	1227	1281	1610	1580	13.3549	12.1545	16.5894	17.979
Rapgef2	0.612619	0.00372201	0.0572993	829	812	1552	938	5.94701	5.07801	10.5401	7.03494
Evi5l	0.715712	0.00361981	0.0559743	161	186	268	290	2.32159	2.33811	3.65851	4.37191
Socs2	2.48486	0.00310578	0.0502694	5	15	87	22	0.043638	0.114125	0.718826	0.200739
Rabgap1l	0.466546	0.00293512	0.0478857	1244	1353	1572	1942	6.81013	6.45694	8.14701	11.1147
Ptpn3	0.684572	0.00291106	0.0476831	232	223	346	374	2.06676	1.73181	2.91802	3.48328
Atxn7l1	0.423495	0.00281195	0.0463067	781	874	1174	1008	6.86234	6.69463	9.76562	9.25968
Sft2d2	0.413408	0.0026987	0.0447416	816	880	1136	1084	8.4427	7.93721	11.127	11.7256
Arhgef4	1.10641	0.00241725	0.0409599	60	63	125	135	1.26399	1.15698	2.49294	2.97331
Mettl6	0.404049	0.00236158	0.0401828	1093	1293	1489	1600	22.2311	22.9263	28.6712	34.0232
Ptpre	0.610909	0.00207236	0.0365789	292	312	489	419	3.08537	2.87391	4.89152	4.62863
Stard10	0.725008	0.00169367	0.0306784	201	211	368	303	8.18523	7.49051	14.1871	12.9001
Epcam	0.787951	0.00157164	0.0289468	169	187	277	325	4.68825	4.5223	7.27468	9.42587
Ppp3ca	0.62942	0.00120913	0.0232824	312	349	478	524	3.6697	3.57846	5.32249	6.4435
Hectd2	0.69028	0.00118464	0.0228465	219	250	371	371	2.44938	2.4375	3.92822	4.3381
Ifngr1	0.350381	0.00116195	0.0224796	3514	4410	4849	5019	95.7175	104.718	125.041	142.929
Fbn1	3.37267	0.000878329	0.0176024	1	6	48	22	0.00572546	0.0299472	0.260173	0.131688
Dtx3	0.419585	0.00076796	0.0157761	1190	1492	1858	1654	28.903	31.5906	42.722	41.9996
Tnrc18	0.472183	0.000663387	0.014027	1046	1079	1570	1336	5.50078	4.94661	7.81633	7.34536
Tspan2	0.59518	0.00053406	0.0116951	442	452	672	657	5.93079	5.28716	8.53631	9.21658
Susd6	0.587559	0.000489788	0.0108611	783	829	1382	1009	8.83862	8.15776	14.7687	11.9077
Eaf1	0.359617	0.00047461	0.0105818	3174	3403	4228	4068	42.8201	40.0218	53.9991	57.3768
Dlgap4	0.681592	0.00032621	0.00775143	377	401	571	653	4.1198	3.82008	5.90719	7.46039
Cdh23	1.65383	0.000325068	0.00773927	38	96	277	131	0.193054	0.425168	1.33225	0.695794
Klf3	0.416458	0.000284759	0.00688636	2132	2254	2855	2898	23.6507	21.7974	29.9829	33.6101
B4galt1	0.433398	0.000254649	0.00624207	1625	1790	2437	2099	20.487	19.673	29.0864	27.6663
Gtpbp2	0.4681	0.000228383	0.00572588	965	1169	1506	1386	14.5155	15.329	21.4457	21.7962
Tef	0.621812	0.000183992	0.0046895	414	515	739	661	5.20683	5.64643	8.79888	8.69137
Dapk1	1.0467	0.00016142	0.00418365	435	259	797	643	4.22185	2.19132	7.32288	6.52436
Pou6f1	0.720805	0.000152839	0.00400348	355	526	762	653	3.42102	4.41883	6.95173	6.57893
Fam214a	0.77148	0.000141993	0.00377572	245	285	432	454	1.49384	1.51487	2.49363	2.89406
Hivep2	0.482392	0.000100333	0.00278866	1548	1579	2260	2045	8.20032	7.29182	11.3339	11.3258
Itgb4	1.65588	9.77e-05	0.00272107	80	119	459	159	0.727758	0.943708	3.95294	1.5122
Pag1	0.408943	9.75e-05	0.00272107	3145	3324	4292	4155	21.7798	20.0672	28.1386	30.0827
Mtmr9	0.585779	7.53e-05	0.0021701	2562	2520	3393	4104	34.1607	29.2915	42.8294	57.2096
Plec	0.488498	7.43e-05	0.00214681	1719	1914	2395	2601	6.35929	6.17261	8.38782	10.0598
Eng	0.933016	7.2e-05	0.00210486	229	273	402	533	3.66544	3.80932	6.09154	8.91932
Fam102a	0.985713	7.04e-05	0.00207392	157	243	431	341	2.12862	2.87209	5.53205	4.83356
Tpd52	1.24626	3.32e-05	0.00105514	128	138	392	232	2.47575	2.32686	7.17784	4.69137
Hdac4	0.553154	2.9e-05	0.000938417	1535	1504	2343	2059	9.57064	8.17475	13.8298	13.4216
Epb41l4b	1.25451	9.77e-06	0.000371529	342	312	1042	514	3.04812	2.42412	8.79191	4.78942
Trim14	0.860791	4.22e-07	2.18e-05	356	401	706	644	4.96926	4.87956	9.32947	9.39814
Agfg1	0.790203	2.89e-07	1.56e-05	1625	1941	3572	2495	11.7087	12.192	24.3656	18.7949
Glipr2	1.52305	2.14e-07	1.18e-05	161	159	590	323	4.55923	3.92515	15.8171	9.56274
Agrn	1.03873	1.33e-07	7.68e-06	340	344	791	597	2.56016	2.25809	5.63865	4.69977
Ptpn13	1.62191	2.21e-08	1.46e-06	109	107	277	375	0.752477	0.643938	1.81033	2.70653
Mov10	0.791678	1.19e-08	8.25e-07	706	785	1253	1279	11.197	10.8533	18.813	21.2071
Cpt1a	0.677087	1.17e-08	8.18e-07	2637	2817	4093	4466	32.4235	30.1946	47.6432	57.4092
Phlda3	1.72159	3.77e-09	2.84e-07	74	97	317	236	2.88406	3.29562	11.6961	9.61608
Slc11a2	0.836597	3.06e-09	2.36e-07	596	691	1138	1115	7.79236	7.87579	14.0856	15.2409
Notch1	0.628803	3.92e-10	3.49e-08	19059	22141	34326	28270	114.837	116.298	195.801	178.083
Atp8a1	0.765992	7.48e-11	7.18e-09	1205	1319	2166	2051	8.42652	8.04081	14.3394	14.9948
Dennd2d	1.52279	1.73e-12	2.02e-10	158	171	460	468	2.18783	2.06418	6.03011	6.77512
Rnf135	0.86625	0.0499383	0.34064	66	43	99	99	1.92625	1.09403	2.73535	3.02076
Socs3	0.630501	0.0496304	0.339482	274	382	698	302	5.35034	6.50262	12.9032	6.16527
Slc27a1	0.413401	0.0494716	0.338584	464	604	587	796	7.48137	8.48973	8.96008	13.4181
Cd19	2.70353	0.0494313	1	1	5	34	4	0.0211288	0.0920954	0.680086	0.0883585
Mitd1	0.394088	0.0490606	0.336521	376	367	461	500	7.73295	6.57987	8.9757	10.7508
Inpp1	0.48898	0.049012	0.336521	173	187	265	232	1.75376	1.65256	2.54319	2.45881
Zbed6	0.340745	0.0489038	0.336521	776	730	886	993	8.86107	7.26676	9.57786	11.8546
Slc41a3	0.921302	0.0483505	0.33464	42	39	70	81	1.03954	0.841489	1.64021	2.09599
Zkscan5	0.414334	0.0482782	0.334328	267	292	358	373	3.93038	3.74714	4.98903	5.74045
Ppp1r18	0.49514	0.0482191	0.334107	189	185	255	264	1.69585	1.44708	2.16609	2.47653
Sytl4	2.25217	0.0482095	1	4	4	29	9	0.0609373	0.0531223	0.418246	0.143344
Dgcr6	2.57361	0.0480467	1	2	5	37	4	0.0736784	0.160574	1.29039	0.154058
Ctnnd1	1.21578	0.0479577	0.332671	17	38	43	79	0.140803	0.274373	0.337165	0.684078
Tex9	0.406283	0.0477839	0.33184	280	305	376	385	3.70833	3.52139	4.71431	5.33083
Lsp1	0.460258	0.0477276	0.331812	713	1051	907	1437	19.4399	24.9804	23.4111	40.9614
Stk39	0.798435	0.0475013	0.331	50	85	102	125	0.88042	1.30477	1.70032	2.30114
Lppos	1.57564	0.047353	0.330424	8	12	28	30	0.535592	0.700357	1.77465	2.09981
Cd80	1.85474	0.0471482	0.329502	8	5	28	19	0.157614	0.0858753	0.522243	0.391356
Mybpc2	2.09988	0.0467019	1	4	5	24	14	0.0419398	0.0457015	0.238225	0.153465
BC004004	0.334511	0.0464997	0.326742	450	528	642	568	9.15931	9.36867	12.3707	12.0868
Ccr7	0.773674	0.0463374	0.326575	73	89	175	98	2.11328	2.24605	4.79605	2.96603
Ablim2	1.41319	0.0461714	0.325986	17	24	26	79	0.24935	0.306878	0.361031	1.21144
Jph2	2.59365	0.0460977	1	1	4	16	13	0.0135005	0.0470763	0.204493	0.183487
Chd6	0.32515	0.0460849	0.325563	1373	1454	1529	1941	6.84458	6.3188	7.21596	10.1162
2010109I03Rik	0.933607	0.0459946	0.325486	35	45	68	81	1.06047	1.1886	1.95052	2.56584
AU040320	0.325355	0.0458654	0.325097	622	673	883	715	7.57778	7.1476	10.1841	9.10692
Tifab	0.845285	0.0457243	0.324619	45	54	84	90	0.735521	0.769431	1.29979	1.53794
2310035C23Rik	0.343724	0.0457194	0.324619	456	581	625	660	4.72054	5.24321	6.12516	7.14307
Pgm1	0.359434	0.0451159	0.321864	382	424	513	502	4.81283	4.6569	6.11879	6.61234
2210013O21Rik	0.471622	0.0450754	0.321761	206	210	294	274	13.7593	12.2276	18.5903	19.1334
Heg1	0.358441	0.0449792	0.321261	2109	2279	2266	3233	13.1352	12.3736	13.3607	21.0513
B4galnt2	7.04422	0.0449326	1	0	0	47	2	0	0	0.622604	0.0292582
Rab43	0.382124	0.0449086	0.320943	364	472	591	476	4.51933	5.10867	6.94657	6.17865
Gabarapl1	0.409248	0.0447226	0.320468	511	569	850	565	16.4784	15.9956	25.9491	19.0483
Pbx4	0.498781	0.0446919	0.320468	160	202	249	251	6.09861	6.71206	8.98505	10.0023
Fam134b	0.623968	0.0444801	0.319555	93	117	170	147	1.50587	1.65152	2.60594	2.48849
Rab2b	0.450956	0.0443481	0.318979	206	268	320	313	4.27356	4.84676	6.28468	6.78862
Fam35a	0.445946	0.0438237	0.316133	214	256	316	311	3.04286	3.17323	4.25369	4.6232
Ifit1bl2	5.04006	0.0437891	1	0	0	8	4	0	0	0.128682	0.0710544
Osm	0.705148	0.0432911	0.312658	81	80	141	118	2.42849	2.09091	4.00203	3.69869
Slc22a3	0.346372	0.0430093	0.311355	457	531	597	633	7.46322	7.55959	9.22985	10.8076
Fam105a	0.416768	0.042984	0.311355	391	481	499	636	7.28658	7.81422	8.80355	12.3913
AA467197	1.00416	0.0429482	0.311279	32	34	64	66	1.69406	1.5691	3.20751	3.65289
Ikzf4	0.838981	0.0428894	0.311221	70	78	174	88	0.677193	0.657814	1.59358	0.890044
Itga5	0.390538	0.0427572	0.310758	301	370	440	421	3.86037	4.13673	5.34226	5.64492
Snhg15	0.475506	0.0426791	0.310751	308	433	609	400	29.7462	36.4554	55.6811	40.3882
Pisd-ps1	0.512936	0.0426634	0.310751	163	182	262	222	3.26197	3.1751	4.96368	4.64471
9030204H09Rik	5.04649	0.0420992	1	0	0	7	5	0	0	0.580226	0.457692
Themis2	1.17685	0.0420151	0.307419	25	31	85	40	0.371842	0.401952	1.19687	0.622003
Pgap3	0.444751	0.0419415	0.307246	257	345	372	426	6.06181	7.09385	8.30659	10.5049
Gsap	2.23652	0.0418916	1	2	7	28	13	0.028767	0.0877721	0.381271	0.195489
Ggact	0.509753	0.0418615	0.306953	197	230	264	330	5.25589	5.34936	6.66798	9.20466
Snora81	0.790385	0.0416317	0.305706	62	60	107	101	21.6147	18.2349	35.3144	36.8124
Myof	1.41193	0.0415686	0.305425	24	19	88	27	0.192372	0.132763	0.667764	0.22626
Lime1	0.334353	0.0414985	0.305092	574	771	805	848	16.7525	19.6162	22.242	25.8748
Ofd1	0.374165	0.0414892	0.305092	344	432	506	478	4.4168	4.83534	6.1505	6.4164
St3gal1	0.354369	0.04131	0.304525	1119	1338	1316	1747	10.7998	11.2574	12.0241	17.6276
Gm34105	5.05923	0.0411856	1	0	0	5	7	0	0	0.474797	0.734073
Gm39323	0.838486	0.0411538	0.303648	71	72	94	156	1.11552	0.986157	1.39816	2.56247
Xlr4e-ps	1.45509	0.0410931	0.303417	10	17	39	33	0.0692352	0.102605	0.255624	0.238866
Pign	0.402313	0.0409145	0.302974	351	348	481	430	2.96123	2.5594	3.84167	3.79269
Ccdc64	0.347681	0.0401631	0.298852	628	784	1002	761	10.7792	11.7311	16.2819	13.6561
Yipf2	0.6791	0.0400628	0.298497	104	120	145	205	2.73135	2.74738	3.60514	5.62874
Gm36109	1.92686	0.0398647	1	6	6	25	20	0.0524536	0.0457266	0.206907	0.182797
Snn	0.478499	0.0398299	0.297092	250	311	336	426	4.92204	5.33777	6.26261	8.76858
Adrbk2	0.939264	0.0397374	0.296582	33	54	82	80	0.193832	0.276502	0.455969	0.491264
Phyh	0.543527	0.0396204	0.295888	138	165	228	205	5.35283	5.57933	8.3724	8.31328
Parp11	0.617543	0.0396175	0.295888	329	337	344	653	4.59575	4.10378	4.54914	9.53647
Zfp397	0.46369	0.0393698	0.294597	641	606	683	1005	6.67921	5.5047	6.73749	10.9483
Serpinb9	0.660812	0.0393066	0.29444	103	98	152	161	1.45263	1.20486	2.02942	2.37388
Chpf2	0.367275	0.0390303	0.292854	406	449	533	549	3.79171	3.65552	4.71244	5.36037
Fbp1	1.40892	0.0389796	0.292854	9	38	71	48	0.299517	1.10244	2.23691	1.67007
Gm30368	1.08071	0.0389091	0.292854	30	35	53	81	0.292852	0.297844	0.489794	0.826658
Smpdl3a	0.585992	0.038566	0.291738	119	182	236	204	3.79886	5.06491	7.13229	6.80849
BC003331	0.456397	0.0384422	0.29116	224	253	343	300	3.95036	3.88959	5.72656	5.53126
Pik3cd	0.514712	0.0379149	0.288055	332	320	568	356	3.67867	3.09098	5.95814	4.12398
Trim46	0.629759	0.0375878	0.286101	98	119	172	157	1.67057	1.7684	2.77573	2.79803
Mmp15	0.9578	0.0375052	0.285763	35	44	74	76	0.463219	0.50765	0.927172	1.05159
Pik3cg	0.37955	0.0374018	0.285392	1239	1318	1368	1887	10.4007	9.64496	10.8715	16.5606
Pink1	0.337711	0.037248	0.284442	640	886	917	961	15.4591	18.6565	20.9693	24.2684
Gm10240	2.19623	0.037202	0.284398	1	11	30	22	0.104143	0.998657	2.95775	2.39534
Gm26799	1.1019	0.0371153	0.283912	24	40	81	53	0.404656	0.587933	1.29291	0.934252
Zfp329	0.73782	0.0370408	0.283518	158	200	190	388	1.13873	1.25657	1.29637	2.92355
Arv1	0.463979	0.0370161	0.283505	325	409	425	561	2.61899	2.87321	3.24227	4.72636
Gm36279	1.65268	0.0370141	0.283505	7	13	32	29	0.105017	0.17002	0.454489	0.454857
Pdgfa	2.26779	0.0369688	1	4	5	33	10	0.0978177	0.106591	0.76398	0.255665
Mpzl2	2.05962	0.0368431	0.282886	375	362	2560	529	6.17168	5.19367	39.8862	9.10211
Cd79a	1.77143	0.036824	0.282886	10	17	76	15	0.430855	0.638519	3.09995	0.675673
Nipal3	0.374623	0.0367249	0.282508	522	528	633	705	5.7616	5.08042	6.61434	8.13534
Gpr83	1.40013	0.0367177	0.282508	31	43	33	154	0.437308	0.528795	0.440707	2.27123
Scn2b	1.02225	0.0365147	0.281243	48	45	127	61	0.601573	0.491647	1.50682	0.799265
Gm17066	0.48571	0.0364102	0.280614	259	283	330	413	4.01197	3.82154	4.8393	6.6884
Pak6	1.02238	0.0363175	0.280251	34	38	62	81	0.42241	0.41156	0.729218	1.05209
Pcsk1	2.40415	0.0361501	1	2	5	23	13	0.0228973	0.0499019	0.249282	0.1556
Gbas	0.37449	0.0361371	0.27921	421	521	570	623	10.6459	11.4851	13.6454	16.4704
Enpp5	0.69071	0.0358103	0.277468	83	96	138	145	1.86756	1.88305	2.93959	3.41098
Tor3a	0.48331	0.0357325	0.277305	197	222	297	278	3.44656	3.38584	4.91911	5.08486
Agpat4	0.739816	0.0356145	0.27709	80	83	121	146	2.38351	2.15575	3.41289	4.54772
C1qb	4.34369	0.0354979	1	0	1	15	5	0	0.0469322	0.764503	0.281424
Spns3	0.750101	0.0354462	0.27613	63	99	138	127	1.79114	2.45369	3.71432	3.77492
Wipi1	1.57225	0.0354117	0.276036	13	11	45	26	0.409063	0.30174	1.34051	0.855332
Gm38639	1.24163	0.0353881	0.276027	18	25	46	53	1.13466	1.37382	2.74513	3.49289
Gm4759	0.88026	0.0352826	0.275379	57	51	113	84	1.05433	0.822369	1.97875	1.62441
Plscr1	0.942922	0.0352439	0.275252	51	53	127	71	1.36193	1.23383	3.2107	1.98225
Nrros	0.374761	0.0350596	0.274336	1570	1807	1780	2492	25.2217	25.3061	27.071	41.8539
Rab11fip2	0.559138	0.0349996	0.274041	133	171	226	212	1.4179	1.58922	2.28094	2.36289
Aldh1l2	5.15354	0.0349588	1	0	0	9	4	0	0	0.0807863	0.0396514
Prg4	5.15354	0.0349588	1	0	0	9	4	0	0	0.113871	0.0558902
Anks3	0.335226	0.0349359	0.273804	568	708	767	806	7.70282	8.37006	9.84707	11.4275
Esr2	3.69584	0.0346806	1	0	2	20	5	0	0.0296502	0.321992	0.0888973
Abcg3	0.410087	0.0346048	0.27199	522	639	656	848	9.54126	10.1819	11.3514	16.2049
Tmem71	0.779528	0.0345972	0.27199	73	71	112	131	1.424	1.20736	2.06831	2.6716
Tnfrsf1b	0.38934	0.0340336	0.269396	710	787	1146	788	8.26254	7.98406	12.6255	9.58728
Pcmtd2	0.415395	0.0338108	0.268324	408	443	507	605	2.08819	1.97655	2.45657	3.23727
Ahr	0.588848	0.0336902	0.267713	292	312	586	314	3.03876	2.83049	5.77326	3.41631
Adck4	0.45684	0.0336544	0.267601	234	321	376	367	3.00783	3.59696	4.57547	4.93194
Bbc3	1.72521	0.0336038	0.267372	188	262	1145	327	4.9948	6.06813	28.7989	9.08284
Filip1l	0.947939	0.033348	0.266893	47	41	90	78	0.680993	0.517872	1.23452	1.18155
Mxd4	0.509561	0.0333254	0.266893	327	418	421	610	15.8575	17.6709	19.3277	30.9266
Oxr1	0.365287	0.0333157	0.266893	681	750	819	986	5.20184	4.99419	5.92249	7.87411
Pnpla7	0.385088	0.0332117	0.266496	382	490	545	567	3.99573	4.46809	5.39684	6.20054
Thsd1	1.47977	0.0332103	0.266496	14	15	31	48	0.180605	0.168689	0.378595	0.647377
Slc8b1	0.953301	0.0330712	0.265716	39	46	76	85	0.771025	0.792785	1.42242	1.75686
Gm34450	5.67551	0.033043	1	0	0	19	0	0	0	0.168454	0
B3gntl1	0.688516	0.0330033	0.265518	88	106	172	135	1.23681	1.29874	2.28855	1.98367
Arl14ep	0.478052	0.0328472	0.264956	401	375	464	599	6.93076	5.65017	7.59215	10.8237
Mthfr	0.484177	0.0326382	0.263443	210	245	340	285	1.77298	1.8032	2.71753	2.51561
Ifi47	0.443481	0.0325632	0.26301	300	300	397	406	8.85511	7.71947	11.0936	12.5289
Cd1d1	0.485799	0.0325605	0.26301	237	245	316	347	7.10558	6.40341	8.9691	10.8766
Cyp2j9	2.31542	0.0320176	1	3	5	25	14	0.0882322	0.128195	0.696075	0.430475
Gsn	0.452877	0.0319261	0.259228	263	343	385	424	5.53641	6.29448	7.67261	9.33152
Fbxw9	0.649017	0.0318882	0.259092	102	165	197	209	3.16429	4.46226	5.78567	6.77855
Serhl	0.602633	0.0317715	0.258446	134	180	208	256	2.72744	3.19387	4.00797	5.44759
Cd52	0.58923	0.0315851	0.257309	140	200	286	214	15.9134	19.8179	30.7759	25.4309
Gm16938	2.22747	0.0314431	1	3	6	24	17	0.0538366	0.0938645	0.407735	0.318948
Slc28a2	0.798302	0.0306464	0.25234	61	90	116	139	0.893351	1.14902	1.60828	2.12824
Phldb1	0.803165	0.030555	0.25197	74	72	147	105	0.699208	0.593063	1.31493	1.03724
Mtm1	0.931791	0.0302921	0.251445	61	44	100	99	0.982711	0.617935	1.52513	1.66742
Gns	0.355	0.0302531	0.251291	529	582	681	713	7.84573	7.52479	9.5617	11.0556
Zfc3h1	0.507672	0.0301664	0.25074	794	861	859	1436	5.96616	5.6399	6.11052	11.2809
Tle4	0.428046	0.0300815	0.250204	338	375	443	497	4.06157	3.92828	5.03955	6.24379
5033406O09Rik	1.23868	0.0298343	0.248919	27	22	69	46	0.892834	0.634196	2.16006	1.5903
Zfp169	0.760652	0.0296545	0.248164	258	245	258	574	1.33942	1.10881	1.26802	3.11546
Pde4dip	0.379406	0.0293727	0.246984	414	459	589	527	2.81353	2.7193	3.78946	3.74434
Gm31619	1.32905	0.0292616	0.246598	18	26	40	67	0.31205	0.392933	0.65648	1.21434
Asah2	0.863079	0.0288174	0.243729	60	56	103	105	0.474608	0.386159	0.771314	0.868335
Hsd17b11	0.443235	0.0286349	0.242942	305	371	421	477	10.2638	10.8837	13.4122	16.7819
Chchd5	0.392093	0.0285809	0.242797	374	444	561	492	16.4108	16.9838	23.304	22.5703
Tspo	0.583828	0.0283947	0.241906	145	202	235	271	9.68493	11.7618	14.8596	18.9239
Gnptg	0.465799	0.0282433	0.241286	248	269	368	334	11.3981	10.7777	16.0118	16.0488
Atp8a2	1.53554	0.0282422	0.241286	14	15	30	52	0.150459	0.140532	0.305226	0.584262
Inpp4a	0.816372	0.028135	0.240928	61	70	110	116	0.486422	0.486603	0.830397	0.967063
Gm6093	5.25874	0.0281248	1	0	0	10	4	0	0	0.168514	0.074439
Chac1	2.61669	0.0279126	0.23946	26	26	281	40	0.947442	0.825936	9.69384	1.52389
Gm5111	2.39136	0.0278546	0.239297	1	9	33	17	0.0593096	0.46533	1.85289	1.05411
Tnfrsf13b	0.436338	0.0276871	0.238525	393	448	502	611	8.50798	8.45484	10.2884	13.8289
Gm12253	1.83635	0.0276168	0.238086	8	9	39	21	0.337312	0.33081	1.55674	0.925712
Dennd3	0.471408	0.0276133	0.238086	228	295	368	341	2.40424	2.7118	3.67367	3.75933
Gm39348	1.26414	0.0274629	0.237092	24	21	59	48	0.520754	0.397223	1.21195	1.08887
Gm2629	0.820415	0.027178	0.23546	104	97	230	123	5.10399	4.14994	10.686	6.31096
Milr1	0.692281	0.0271456	0.235345	136	112	183	213	2.57816	1.8509	3.28422	4.22148
Gm5801	1.08378	0.0269304	0.233809	38	31	78	67	1.82727	1.2995	3.55079	3.36829
Idnk	0.436922	0.0269096	0.233794	283	357	425	422	10.7084	11.776	15.2243	16.6941
Mctp2	0.790964	0.0264343	0.230479	66	78	121	123	0.595004	0.613005	1.03269	1.1593
1700010I14Rik	1.28381	0.0260675	0.228449	20	26	46	63	0.608887	0.690039	1.32579	2.00522
Nfe2	2.27822	0.0256095	0.226224	3	8	39	13	0.0909456	0.211419	1.11927	0.412019
4931406C07Rik	0.662918	0.0253901	0.224724	99	138	187	179	2.0538	2.49572	3.67261	3.88231
Ctso	0.645048	0.0250325	0.222361	115	127	198	174	1.89592	1.82524	3.09028	2.99907
Hid1	0.408202	0.0246278	0.21943	422	489	557	626	7.28711	7.36115	9.1056	11.3014
Ifitm2	0.469045	0.0240034	0.21603	271	377	474	402	24.7118	29.9688	40.9188	38.3243
Ilvbl	0.434318	0.0238289	0.214775	1016	1376	1305	1831	24.5621	28.999	29.867	46.2779
Slc25a45	0.393283	0.0236804	0.214064	400	470	593	528	8.92305	9.13998	12.5233	12.3141
Dgkg	0.657791	0.023101	0.210375	145	186	212	296	1.45189	1.62358	2.00961	3.09864
Serpinb1a	2.0988	0.02308	0.21034	5	10	48	15	0.149047	0.259865	1.35458	0.467475
Polm	0.593227	0.0229641	0.209594	139	168	240	214	2.44681	2.57804	3.99952	3.93835
Zfp213	0.523947	0.0229549	0.209594	231	226	318	329	4.93916	4.21253	6.43692	7.35446
Ston2	0.669616	0.0229391	0.209594	181	135	264	236	1.04573	0.679939	1.44396	1.4255
Shmt2	0.328027	0.0228879	0.209521	12734	15583	20755	14198	315.861	336.958	487.376	368.19
Ccdc17	2.02657	0.0228246	0.20929	3	13	29	33	0.0856332	0.323488	0.783663	0.984802
Tmem63a	0.440353	0.0228117	0.20929	313	357	437	454	5.19617	5.16655	6.86801	7.87968
Cxxc5	0.405176	0.0227998	0.20929	834	1120	1106	1409	17.4601	20.4405	21.9203	30.8394
Exoc3l	0.846747	0.022775	0.20929	57	72	117	110	0.961624	1.0589	1.86864	1.94016
Ankrd12	0.358315	0.0227169	0.20929	659	696	828	878	3.36681	3.09982	4.00474	4.68966
Kifc2	0.990921	0.0226527	0.209261	36	67	99	99	0.580124	0.941211	1.5103	1.66789
Gm36470	0.70789	0.0225778	0.209019	93	154	210	182	1.33935	1.93342	2.86313	2.74029
Pde1b	0.59495	0.0225727	0.209019	158	181	231	270	2.80371	2.79994	3.8806	5.00904
Izumo4	0.86875	0.0224524	0.208454	63	66	105	126	2.82067	2.57602	4.45052	5.89788
4931428F04Rik	0.442829	0.0222149	0.207277	292	350	440	415	3.58877	3.74994	5.11947	5.33242
Tor4a	0.473826	0.0220286	0.206109	408	466	516	670	6.8049	6.77549	8.14744	11.6829
Apobr	1.0591	0.0218481	0.204889	39	37	77	79	0.61939	0.512265	1.15771	1.31172
Hmgn3	0.590097	0.0217564	0.20481	151	164	241	225	5.81762	5.50815	8.79013	9.06285
Eml5	0.537891	0.0214624	0.203472	203	261	306	351	1.01031	1.13238	1.44175	1.82633
Sepp1	0.499042	0.0213858	0.203347	245	355	405	420	6.68308	8.44176	10.4587	11.9777
Zfp119a	1.31969	0.0211959	0.201854	20	27	47	67	0.309973	0.364797	0.689607	1.08563
Inpp4b	0.876346	0.0211171	0.201854	53	84	116	128	0.362166	0.500386	0.750413	0.914442
Tbc1d23	0.481004	0.0209226	0.200494	302	313	400	443	4.58245	4.14028	5.74595	7.02763
Bcl2l2	0.747115	0.0208283	0.199902	131	108	175	221	1.20785	0.868076	1.52753	2.13033
Ddias	0.407621	0.0204723	0.197878	398	446	583	517	6.47749	6.3278	8.98262	8.79688
Fam129a	0.755135	0.0204699	0.197878	107	100	201	145	1.04737	0.853313	1.86261	1.48387
Axl	0.537959	0.0204361	0.197839	189	253	308	318	2.12549	2.48034	3.27912	3.73885
Mical1	0.344109	0.0202545	0.196701	890	1151	1402	1135	13.2204	14.9047	19.7157	17.6264
Zbtb20	0.795429	0.0199654	0.1942	75	85	150	123	0.145226	0.143481	0.274969	0.249001
Rbpms	0.813744	0.0197855	0.192756	89	91	131	179	0.610135	0.54384	0.850193	1.28293
Atxn7	0.405048	0.0197718	0.192756	440	507	592	636	2.79395	2.80652	3.55876	4.22219
Mdfic	0.641034	0.0195485	0.190901	126	141	215	194	2.09723	2.04592	3.38785	3.37591
Gng2	1.21285	0.0194804	0.190539	26	36	87	54	0.388535	0.468979	1.2308	0.843655
Cd48	0.35366	0.0192841	0.18943	608	728	829	842	30.4396	31.7732	39.2917	44.0719
Mcoln2	0.492128	0.0192554	0.189394	280	291	381	408	4.89567	4.43548	6.30652	7.45811
Mboat1	0.529004	0.0192431	0.189394	246	237	367	321	4.88196	4.10016	6.89501	6.66006
Hsd11b1	1.67468	0.0191977	0.189394	12	14	54	28	0.49934	0.507852	2.12725	1.21811
Gm20008	0.733468	0.0191178	0.189247	129	118	176	228	2.40088	1.91451	3.10101	4.43639
Tespa1	0.577193	0.0190998	0.189247	522	539	587	960	10.9765	9.88042	11.6853	21.1046
Sesn2	1.5011	0.0189855	0.189009	257	316	1169	438	5.52816	5.92554	23.8052	9.84998
D730005E14Rik	2.1234	0.018742	0.186888	5	7	25	26	0.0792549	0.096727	0.375151	0.430867
Zdhhc4	0.377039	0.0187268	0.186887	499	609	705	703	15.1675	16.1371	20.2868	22.34
Dkkl1	0.897258	0.0186915	0.186887	53	79	135	105	2.08408	2.70806	5.02553	4.31659
Ifi204	2.48421	0.0186826	1	4	5	39	11	0.0498035	0.0542705	0.459701	0.143188
Ngfr	2.94782	0.0184883	0.185412	3	4	50	4	0.0503149	0.0584829	0.793881	0.0701373
Rbm43	0.386062	0.0184371	0.1852	476	565	661	671	11.3966	11.7926	14.9823	16.7959
Tnfsf8	1.19004	0.0181615	0.182881	27	32	69	63	0.64753	0.669021	1.56659	1.57961
Ccdc157	0.752346	0.0179469	0.181016	88	108	181	143	0.876237	0.937468	1.70619	1.48864
Elavl4	0.663759	0.0176775	0.179267	121	147	197	218	1.60067	1.69523	2.46714	3.015
Rab19	1.00884	0.0176681	0.179267	43	48	97	83	1.58613	1.5435	3.38729	3.20083
Maml2	0.728155	0.0172891	0.176345	100	105	172	162	0.873159	0.799239	1.42178	1.47884
Zfp579	0.412762	0.0172828	0.176345	392	485	593	550	7.0858	7.64255	10.1477	10.3939
Fas	0.838284	0.0172802	0.176345	64	99	136	147	2.44597	3.29837	4.92062	5.87357
Plgrkt	0.380284	0.0171464	0.17583	496	613	729	684	11.5796	12.4758	16.1121	16.6949
Pnpo	0.41313	0.017003	0.174978	484	589	658	738	13.5916	14.4189	17.4928	21.6668
Tep1	0.500202	0.0168052	0.173489	318	335	517	394	2.2273	2.04546	3.4281	2.88511
Cd27	0.456557	0.0167088	0.172926	1590	1970	1911	2839	51.5056	55.6311	58.6042	96.1472
Nod1	1.16052	0.0165552	0.171774	38	31	84	69	0.496147	0.352844	1.03829	0.941868
Tmem156	0.727077	0.0164737	0.171217	118	156	187	254	1.94091	2.23687	2.91189	4.36787
Gm7115	2.71471	0.0164462	1	3	3	25	14	0.00468963	0.00408821	0.0369971	0.0228802
Tbcel	0.549066	0.0164431	0.171045	525	516	603	890	5.0678	4.34214	5.51046	8.98182
B230118I11Rik	2.27321	0.0164352	0.171045	6	5	36	17	0.136184	0.0989322	0.773547	0.403401
Ppcdc	0.429839	0.0163072	0.169994	368	446	533	540	7.61774	8.04835	10.4452	11.6865
Wls	0.502499	0.0162622	0.169738	283	282	414	375	5.8434	5.076	8.09263	8.09514
Dennd1c	0.480101	0.0161617	0.169055	300	370	434	479	6.76888	7.27765	9.27034	11.2991
Dram2	0.697915	0.0160298	0.168097	108	145	190	210	2.26849	2.65507	3.77814	4.61155
Cyb5r4	0.365611	0.0160204	0.168097	803	799	1081	955	17.4633	15.1479	22.256	21.7135
Serpinb6b	0.623591	0.0159354	0.167609	138	181	241	239	4.07125	4.65501	6.73094	7.37157
Slamf6	0.324143	0.0155577	0.164764	1698	1933	2072	2377	16.0599	15.9379	18.5526	23.5044
Irgm2	2.62184	0.0154302	1	5	2	19	24	0.0813524	0.0283677	0.292661	0.408249
Gm16464	2.58607	0.0153009	1	3	4	19	22	0.058761	0.0683002	0.352316	0.45051
Rcn1	0.458503	0.0152414	0.162253	320	358	477	438	5.97317	5.82548	8.42915	8.54758
Zdhhc20	0.337316	0.0150736	0.161025	885	1011	1143	1204	8.86154	8.82492	10.8348	12.6039
Tk2	0.568527	0.0150701	0.161025	177	222	298	281	3.68532	4.02947	5.87392	6.11677
Oaf	0.515161	0.0149752	0.160392	273	357	497	385	6.53628	7.45126	11.2651	9.63701
Plxdc2	0.406296	0.0149659	0.160392	472	514	640	643	2.18903	2.0781	2.80996	3.1177
Eno3	2.91251	0.0148174	1	2	3	24	13	0.0518589	0.0678123	0.589135	0.352412
Etv5	1.02796	0.0147752	0.158805	751	840	1158	2001	8.62556	8.41047	12.5912	24.0275
Pts	0.420257	0.0147483	0.158701	415	512	599	614	22.9029	24.6324	31.2953	35.4262
9330175E14Rik	3.373	0.0145775	1	2	1	18	13	0.0743491	0.032407	0.633474	0.505246
Gm4951	4.83685	0.0145674	1	1	0	25	4	0.0175543	0	0.415465	0.0734105
Mroh1	0.428322	0.0143912	0.15563	412	474	570	598	3.12495	3.13414	4.0929	4.742
Haghl	0.556796	0.0143852	0.15563	200	259	319	340	7.763	8.76381	11.722	13.7972
Rec8	1.24666	0.0143434	0.155386	22	42	76	71	0.5875	0.977751	1.92136	1.98225
C130046K22Rik	0.753772	0.0143143	0.155209	111	165	193	258	1.82998	2.37138	3.01225	4.44689
Kifc3	0.579765	0.0143106	0.155209	233	327	361	452	3.58013	4.3801	5.25122	7.26097
Ddx19b	0.342961	0.0141412	0.154011	933	977	1272	1114	8.05797	7.35584	10.4002	10.0587
Rarg	3.13654	0.0140765	1	1	3	18	16	0.0193288	0.0505497	0.329372	0.323324
Klhl6	0.382362	0.01399	0.152771	1198	1362	1464	1799	28.4803	28.2266	32.9487	44.7128
Glb1l	0.582575	0.0138207	0.151596	183	212	316	265	1.95788	1.97727	3.20061	2.96412
Glb1	0.415473	0.0137897	0.151471	700	751	868	1029	16.7037	15.6224	19.6085	25.6711
9230114K14Rik	1.03349	0.01367	0.150751	53	51	90	119	1.43071	1.20016	2.30001	3.35844
Pycr1	0.948781	0.0135533	0.149732	81	82	202	110	1.58927	1.40256	3.7521	2.25642
Myzap	0.432097	0.0134326	0.148842	468	478	673	585	11.7204	10.4356	15.9559	15.3167
Cd5	0.412404	0.0134155	0.148842	479	604	687	721	13.2366	14.5503	17.9725	20.8301
Eif4e3	0.439406	0.0133413	0.148568	475	463	641	613	10.807	9.18299	13.8063	14.5809
Glrp1	2.80494	0.013336	1	2	4	27	14	0.0584307	0.101874	0.746767	0.427615
Trgj2	1.9566	0.0131628	0.146738	9	8	31	34	8.57617	6.64561	27.9655	33.8722
Gm16340	2.77379	0.0128115	1	4	2	23	18	0.00808691	0.0035249	0.0440211	0.038046
Gm31850	5.54862	0.0127902	1	0	0	10	7	0	0	0.227806	0.176103
Trim30c	3.966	0.0127744	1	2	0	23	9	0.024033	0	0.261647	0.113067
Tmem18	0.512783	0.0126929	0.142664	263	319	392	420	5.08346	5.37512	7.17299	8.48725
Vps41	0.353186	0.0126376	0.142304	816	945	1072	1131	4.75289	4.79836	5.91116	6.88722
Gpr179	0.853706	0.0126153	0.142182	74	97	135	166	0.453328	0.51802	0.782934	1.06317
Ogdhl	0.879438	0.0125684	0.141914	108	97	236	139	1.23423	0.966356	2.55325	1.66074
Cst7	1.41181	0.0123543	0.140011	20	23	53	59	1.15973	1.16264	2.90945	3.57677
Rnf14	0.374087	0.0123064	0.139598	638	726	858	875	10.47	10.3861	13.3297	15.0123
Bst1	1.17089	0.0121937	0.138575	81	106	318	99	1.9825	2.26167	7.36829	2.53325
Cysltr2	1.64208	0.0121447	0.138146	19	15	71	35	0.460693	0.317061	1.62977	0.887238
Podnl1	0.879038	0.0119937	0.136682	88	89	134	185	2.41892	2.13266	3.48702	5.31648
Tmem180	0.606966	0.0119773	0.136621	220	238	401	287	5.51683	5.20281	9.51967	7.52425
Rab44	1.01146	0.0118739	0.135568	58	73	165	95	0.807628	0.886135	2.17509	1.383
Gm14165	1.35669	0.0116939	0.13401	36	21	78	68	1.87799	0.955003	3.85209	3.70864
Epm2aip1	0.480267	0.0115658	0.13304	882	1116	1134	1577	6.95653	7.6733	8.46735	13.0038
Spo11	0.776788	0.0114812	0.132438	104	139	177	228	2.2905	2.66874	3.69046	5.24984
Nmi	0.446051	0.0114333	0.132258	371	463	576	536	13.0534	14.2011	19.1859	19.7164
Polk	0.741815	0.0113118	0.1311	229	209	279	440	3.00987	2.39471	3.47158	6.04616
Manba	0.676534	0.0113058	0.1311	217	199	282	372	3.25554	2.60262	4.00518	5.83472
Il3ra	0.616435	0.0112064	0.130494	176	185	273	271	5.07961	4.65461	7.45917	8.17713
Flt3l	0.978224	0.0111942	0.130494	50	76	112	129	1.61967	2.14617	3.43468	4.36879
Nup210l	0.932273	0.0111575	0.130494	92	94	132	215	0.633512	0.564272	0.860501	1.54782
Acsf2	0.62993	0.0111039	0.130288	167	216	270	308	3.11116	3.50794	4.76189	5.99888
Gm11346	2.81909	0.0109926	1	2	4	19	22	0.102463	0.178645	0.921514	1.17835
Ei24	0.357966	0.0109877	0.129419	860	893	1135	1076	22.089	19.995	27.5983	28.8937
Itgae	1.65523	0.0109523	0.129126	14	15	51	39	0.187019	0.17468	0.644969	0.544674
Bcas3	0.48686	0.010783	0.12762	330	413	488	529	2.91932	3.18502	4.08694	4.89258
Sfmbt2	0.734426	0.0107078	0.126851	121	121	213	184	0.608828	0.530748	1.01461	0.967923
Cpne2	0.59992	0.0106903	0.126767	220	226	375	292	5.46411	4.89327	8.81736	7.58217
Repin1	0.446039	0.0106394	0.126285	418	547	691	595	7.59661	8.66611	11.8886	11.3051
LOC108167848	0.872456	0.0106	0.12604	105	95	151	209	1.45008	1.14372	1.97419	3.0176
Tmem176a	0.908982	0.0103962	0.124238	70	103	135	180	3.76148	4.82493	6.86759	10.1122
Mcam	0.694975	0.0103578	0.123939	163	216	362	240	2.96326	3.42317	6.23018	4.56149
Tmc6	0.366066	0.0103242	0.123739	692	805	953	938	10.431	10.5781	13.5995	14.7821
Il31ra	5.82836	0.0101829	1	0	0	19	2	0	0	0.229146	0.0266375
Crip1	0.485864	0.010094	0.121931	367	519	654	557	46.9419	57.8703	79.1922	74.4841
Nlrp3	5.95514	0.00997139	1	0	0	22	1	0	0	0.296143	0.0148656
Gm35813	2.07675	0.00993895	0.120533	10	10	22	60	0.457396	0.398736	0.952632	2.86918
Slc38a6	0.864026	0.00987793	0.12003	70	95	146	147	0.816611	0.966128	1.61243	1.79287
AI480526	0.713225	0.00983486	0.119744	307	312	371	621	2.6847	2.37851	3.07144	5.67757
Micall2	1.3085	0.00972694	0.118783	22	40	80	69	0.375923	0.59584	1.29413	1.23265
Uvssa	0.557965	0.00971369	0.118739	287	372	425	520	2.21774	2.50591	3.10905	4.20094
Nlrc3	0.503131	0.00970705	0.118739	527	601	678	884	3.13472	3.11642	3.81793	5.49737
Wdr19	0.92755	0.00961036	0.117763	67	73	122	139	0.605547	0.575161	1.04386	1.31341
LOC102640779	1.4486	0.00948562	0.116647	27	25	51	88	0.562987	0.454431	1.00673	1.91837
Tnfsf10	0.612286	0.00945266	0.116359	243	236	331	389	2.81015	2.37919	3.62378	4.70313
P2rx7	0.73967	0.00928073	0.114818	120	137	195	225	1.38998	1.38338	2.13832	2.72473
Paqr5	1.37285	0.00923555	0.114605	24	27	74	56	0.392053	0.384496	1.1444	0.956392
Trim21	0.523267	0.00920089	0.11429	283	401	488	470	5.79942	7.16368	9.46734	10.0695
Ccr4	0.886144	0.00899616	0.112087	77	89	136	164	1.57963	1.59165	2.64128	3.51741
Ptpn22	0.541619	0.0088935	0.111259	388	342	519	531	3.78045	2.9049	4.78729	5.40904
Ly6c1	1.08627	0.0086966	0.109018	41	53	97	98	2.63092	2.96479	5.89259	6.57453
Cobll1	1.1863	0.00867101	0.108808	34	43	79	92	0.364647	0.402027	0.802104	1.03156
Pdk2	0.715928	0.00856074	0.107755	118	151	220	212	2.82639	3.15297	4.98865	5.30884
Acox2	5.70574	0.00846343	1	0	0	12	7	0	0	0.246031	0.158493
Mdfi	0.991084	0.00841609	0.106475	69	61	144	112	2.30569	1.77695	4.55538	3.91277
Prss57	0.386781	0.008353	0.105794	629	719	884	845	10.43	10.3934	13.8771	14.6489
Wdr81	0.589268	0.00823434	0.104864	331	426	472	636	2.19953	2.46777	2.9693	4.41848
Tmc5	1.55942	0.00797813	0.102095	24	30	46	108	0.329853	0.359438	0.598518	1.55184
Rhbdf2	0.828667	0.00787957	0.101367	124	163	315	186	1.83717	2.10527	4.41823	2.88107
Asb13	0.64674	0.00784553	0.101136	172	191	265	292	4.0805	3.95014	5.9517	7.24239
Casz1	2.88837	0.00778548	1	4	3	40	12	0.0266672	0.0174354	0.252457	0.0836397
H2-T10	0.954356	0.00770293	0.099611	119	226	436	215	2.34855	3.88826	8.14611	4.43615
Fam167a	0.564867	0.00767132	0.0993068	350	365	462	575	4.49081	4.08266	5.61189	7.71327
Zeb2	1.01211	0.00763252	0.0989088	96	103	269	129	0.594342	0.555899	1.57662	0.834966
Vwa5a	0.590468	0.00762674	0.0989088	233	262	343	387	3.20463	3.14136	4.46608	5.56477
Apobec1	0.80687	0.00757715	0.0985029	92	111	181	167	1.77046	1.86216	3.29753	3.35993
Soat2	2.12209	0.00754874	0.0982376	13	5	44	35	0.349609	0.11722	1.12022	0.984058
Tmem108	0.662113	0.00740369	0.0969662	151	198	284	256	1.86667	2.13378	3.32368	3.3086
Sypl	0.411643	0.00738644	0.096947	660	678	918	835	8.17663	7.32241	10.7667	10.8151
Pdrg1	0.330805	0.00731609	0.0962293	1201	1507	1719	1613	55.8719	61.1163	75.7071	78.451
Cep83os	0.694514	0.00722558	0.0953451	139	170	238	251	1.92195	2.04913	3.1154	3.62839
Ly75	0.494385	0.00715074	0.0944589	553	519	707	781	6.1132	5.00155	7.399	9.02628
Cox6b2	0.705651	0.00709642	0.0941507	138	156	230	240	13.5104	13.314	21.3171	24.5649
Lpin1	0.659268	0.00659817	0.0883953	386	380	750	450	3.92274	3.36651	7.21562	4.78111
Cd79b	0.709932	0.00647936	0.0870886	132	160	244	224	6.13081	6.47825	10.7286	10.8769
Abcg1	0.394821	0.00636821	0.0857823	814	916	1073	1156	7.99519	7.84321	9.97733	11.8707
Spib	0.956866	0.00635662	0.0857823	163	161	432	194	2.64907	2.281	6.64661	3.29626
2900079G21Rik	0.604434	0.00634492	0.0857507	218	302	372	398	4.2094	5.08352	6.80013	8.03454
Inadl	0.832638	0.00632449	0.0857507	100	130	178	221	0.767752	0.870077	1.29375	1.77389
Gm15708	0.717611	0.00609776	0.0833271	141	154	233	243	4.56489	4.34636	7.14131	8.22492
Icosl	1.40587	0.00609157	0.0833271	23	35	64	85	0.478534	0.634815	1.2606	1.84892
Gm19639	1.98566	0.0059507	0.0818637	10	10	41	37	0.518825	0.452287	2.01379	2.00695
Esyt2	0.340255	0.00594107	0.0818637	1573	1804	2018	2169	6.73876	6.73723	8.18432	9.71459
Fam189b	0.386274	0.00590615	0.0817083	745	880	1036	1044	13.1588	13.5499	17.3233	19.2785
LOC108167657	1.1065	0.00590025	0.0817083	54	48	112	105	2.55159	1.9772	5.01008	5.18705
St14	1.67616	0.00585386	0.0812595	12	25	53	61	0.170798	0.310194	0.714145	0.907704
Fxyd5	0.350679	0.00580899	0.0809109	1348	1463	1908	1620	66.1555	62.5913	88.6472	83.1199
Kdm7a	0.591058	0.0057413	0.080241	268	260	399	385	1.60397	1.35653	2.26071	2.409
Mapkbp1	0.575876	0.00567243	0.0794593	267	356	429	476	2.10154	2.4427	3.19664	3.91694
Gimap1	0.546412	0.00562768	0.0790126	459	545	625	806	17.4373	18.0491	22.4779	32.0121
Myo6	0.983584	0.00559971	0.0787429	81	70	166	130	0.576944	0.434651	1.11935	0.968069
Tmem181b-ps	0.581804	0.00557461	0.078627	480	487	607	812	5.8267	5.15352	6.97558	10.3051
Tlr7	2.21164	0.0054686	0.0774876	7	9	47	26	0.100558	0.112708	0.639186	0.390487
Ssh3	0.767304	0.00540029	0.0767853	131	133	240	203	2.74555	2.42998	4.76189	4.44803
F830016B08Rik	5.23183	0.00529631	1	1	0	32	6	0.0129295	0	0.391691	0.0811052
Gzma	0.398368	0.0052313	0.0747286	5179	6246	6458	8227	337.251	354.571	398.122	560.097
Herc6	0.672824	0.00507873	0.0727181	324	364	673	410	3.5091	3.43673	6.90042	4.64246
Bace1	0.938718	0.00490333	0.0707842	88	96	208	140	1.20425	1.14525	2.69468	2.00298
Atp6v0c	0.743972	0.0048932	0.0707211	209	202	410	272	10.3818	8.74726	19.2806	14.1257
Arhgef5	0.865065	0.00485239	0.070214	95	131	233	170	1.00454	1.20757	2.33245	1.87935
Hmgcs2	0.614137	0.00482604	0.0699149	454	561	622	890	7.88015	8.48858	10.2207	16.1504
Tmem191c	0.747821	0.00480139	0.0697223	131	145	231	224	5.3195	5.13288	8.88018	9.50958
Pgd	0.661529	0.00478501	0.0695667	190	290	390	349	4.88451	6.49919	9.49166	9.38008
Rasal1	0.453662	0.00475545	0.0692189	490	542	712	676	7.17978	6.92322	9.87655	10.3556
Il34	2.57582	0.00472831	0.0689873	5	5	37	22	0.153777	0.134056	1.0773	0.707391
Dtx4	2.07047	0.00469672	0.0686078	25	17	151	28	0.247723	0.146848	1.41649	0.290067
Mob3a	0.338076	0.00462113	0.0677278	1318	1518	1759	1755	28.4684	28.5834	35.9687	39.6314
Gm4070	6.02684	0.00461076	1	0	0	20	4	0	0	0.119789	0.0264577
LOC102641031	1.22218	0.00457892	0.0672871	37	44	91	94	0.639303	0.662753	1.48853	1.69804
Tox3	1.58691	0.00456868	0.067217	25	26	103	49	0.307588	0.278867	1.19971	0.630289
Fbxl20	0.509039	0.00456172	0.067217	673	744	871	1102	4.25787	4.10341	5.21683	7.28909
Prkd2	0.367574	0.00440699	0.0653074	1825	2007	2286	2560	28.7844	27.5953	34.1335	42.2132
Cpa3	1.28135	0.00439106	0.06515	35	38	83	91	1.37722	1.30351	3.0919	3.74362
Gsdmd	0.592583	0.00438194	0.0650933	270	315	405	458	8.69206	8.84023	12.3431	15.4148
Pdcd1	0.627622	0.00436198	0.0648752	282	331	409	516	8.35399	8.54804	11.4704	15.9812
Sp110	0.405989	0.00434374	0.0647607	1759	2016	2220	2671	48.655	48.6123	58.1333	77.2413
Stoml1	0.630689	0.00430369	0.0643198	198	242	341	326	3.66479	3.90475	5.97515	6.30835
Zfyve28	1.08079	0.00415462	0.0623955	50	65	126	112	0.527245	0.597516	1.25783	1.23474
Psme2b	0.503182	0.00413242	0.0621381	365	441	576	543	19.5766	20.6195	29.2468	30.448
Erap1	0.352027	0.00412194	0.0620565	2034	2087	2538	2635	23.4178	20.9465	27.6629	31.7168
Ap3m2	1.22635	0.00398341	0.0602662	35	51	98	98	0.577187	0.733183	1.52998	1.68962
Anxa7	0.44838	0.00388799	0.0591197	611	734	986	815	11.782	12.3386	17.9997	16.4304
Atp1b1	0.500677	0.00387798	0.0591078	434	514	724	593	9.58059	9.89143	15.1304	13.6858
Vsir	0.759287	0.00385855	0.0588849	138	221	298	292	1.62816	2.27303	3.32847	3.60177
Sytl3	0.489679	0.00373888	0.057487	417	533	664	640	8.79445	9.79927	13.2572	14.1113
Tmc8	0.52256	0.00370977	0.0571827	368	477	582	603	6.64148	7.50463	9.94375	11.3775
Rtp1	6.03352	0.00368057	1	0	0	18	6	0	0	0.31227	0.114951
Lars	0.39389	0.0036124	0.0559743	1790	2201	2909	2238	26.6655	28.5832	41.0252	34.8555
Zfp768	1.83406	0.00360367	0.0559743	10	22	53	57	0.254448	0.487995	1.27669	1.51631
Slc14a1	0.904332	0.00354374	0.0552472	108	138	187	261	1.59557	1.77731	2.61543	4.0313
Aim2	0.963571	0.00353414	0.0551676	118	126	302	169	1.19282	1.11034	2.89008	1.78605
Jakmip1	0.530374	0.00351642	0.0549609	370	477	578	616	3.6267	4.07589	5.3635	6.31255
Lztfl1	0.488675	0.00351075	0.0549422	487	609	721	781	4.18078	4.55763	5.85967	7.00959
Dcaf11	0.430004	0.00348044	0.0546069	645	710	938	856	10.824	10.3868	14.902	15.0182
Igk	0.953179	0.00345387	0.0542593	100	103	163	222	0.00180297	0.0016189	0.00278219	0.00418462
Iars	0.329046	0.00341504	0.0537868	4689	4987	6565	5414	60.4489	56.0456	80.1223	72.9694
Prrg4	1.34958	0.00339595	0.0536238	31	41	106	74	0.622772	0.718034	2.01597	1.55422
Zfp512b	0.465755	0.00331582	0.052697	1267	1419	1608	2020	11.8521	11.5716	14.2402	19.7553
Srgn	0.533373	0.00328732	0.0523796	1326	1726	2645	1693	26.4066	29.9643	49.866	35.2484
Gm6548	0.562141	0.00319989	0.0512525	306	335	483	447	8.57197	8.18083	12.809	13.0912
Sfxn3	0.711522	0.00318783	0.0511259	247	210	363	377	4.38166	3.24754	6.09619	6.99193
Slc38a9	0.640722	0.00317751	0.0510448	227	249	354	374	1.18873	1.13672	1.75498	2.0476
Hif3a	1.02994	0.00311425	0.0503402	80	83	139	187	0.599785	0.542472	0.986576	1.46575
Psmb10	0.377247	0.0030627	0.0496376	1004	1119	1398	1310	39.8356	38.7045	52.5116	54.3405
Esm1	0.785161	0.00302217	0.0491102	123	152	240	224	3.34401	3.60247	6.1771	6.36685
Uqcrc1	1.04726	0.00294744	0.0480229	129	102	306	171	4.45381	3.06998	10.0017	6.17237
Msi2	0.381972	0.00292903	0.0478499	1045	1129	1439	1346	8.95896	8.4378	11.6792	12.0643
Synj2	0.649083	0.00289476	0.0474795	302	276	491	406	2.46597	1.96464	3.79552	3.46593
Lax1	0.556011	0.00274223	0.045341	394	480	583	672	7.90689	8.3974	11.0761	14.0991
Znfx1	0.487932	0.00269152	0.0446828	479	579	781	674	3.7942	3.99814	5.85661	5.58161
Pla2g16	1.12243	0.0026274	0.0439151	57	60	119	131	0.925048	0.848857	1.8283	2.22267
4921525O09Rik	0.725463	0.00256917	0.0430003	166	208	289	315	2.90066	3.16844	4.78076	5.75458
Atf6	0.517258	0.00244601	0.0413332	407	458	640	576	3.11805	3.05878	4.64172	4.61344
Afap1	0.684797	0.00242171	0.040979	251	229	388	374	2.08405	1.65754	3.04984	3.24654
Aars	0.506732	0.00237774	0.0404018	3797	4219	6882	4367	49.0602	47.5217	84.1809	58.991
Dyrk1b	0.640126	0.00232121	0.0396056	462	475	611	820	1.99672	1.78963	2.49992	3.70513
BC064078	2.21555	0.00231365	0.0395317	8	10	45	37	0.509917	0.555653	2.71539	2.46562
Ctla2a	2.41556	0.00228206	0.0390462	10	13	100	22	0.41642	0.47192	3.94223	0.957785
Nars	0.474661	0.0022809	0.0390462	4026	4470	6995	4658	86.862	84.0732	142.874	105.068
Armc7	0.426904	0.00228019	0.0390462	702	824	1031	980	17.8464	18.2614	24.8131	26.0467
Susd1	0.405187	0.00226904	0.0390409	1256	1261	1721	1565	16.6654	14.5859	21.6181	21.7097
Cyp4f13	1.35862	0.00221987	0.0383559	34	38	88	93	1.13614	1.10695	2.78385	3.249
Rpgrip1	1.36568	0.00221616	0.0383559	36	50	86	129	0.394836	0.478055	0.892942	1.47917
Yars	0.505589	0.00216083	0.0376997	549	634	919	732	10.9216	10.9951	17.3078	15.2244
Slc2a9	0.985601	0.00208891	0.0367654	78	105	164	189	1.16439	1.36643	2.3177	2.94971
C1qtnf1	0.857028	0.00208206	0.0366975	111	128	226	199	1.29412	1.30093	2.49442	2.4256
Nedd9	0.636418	0.00204955	0.0362806	484	563	973	631	6.01183	6.09626	11.4415	8.19416
Atoh8	2.46874	0.0019964	0.0354418	7	17	106	24	0.145535	0.308114	2.08634	0.521669
Lamp2	0.448618	0.0019885	0.0353527	729	769	1016	994	11.5298	10.6026	15.2124	16.4359
Gtse1	0.403978	0.00195341	0.0348296	1606	1735	2411	1944	33.7334	31.7693	47.9426	42.6898
Dst	0.574608	0.00187055	0.033596	463	432	655	660	1.02779	0.83599	1.3765	1.53173
Pnpla2	0.422977	0.00184265	0.0331919	989	1269	1595	1368	20.8118	23.2792	31.7748	30.0963
AW011738	1.08167	0.00178011	0.0321126	80	86	211	136	1.66629	1.56154	4.16057	2.96151
Spef2	1.2927	0.00169952	0.0307039	44	54	99	135	0.452053	0.483642	0.962903	1.45006
Qsox2	0.395575	0.00169561	0.0306784	1005	1176	1468	1346	14.6807	14.9755	20.301	20.5561
Zcchc11	0.48276	0.00167899	0.0305124	1299	1289	1639	1916	10.4355	9.02717	12.4651	16.0922
Lgals8	0.554083	0.00166385	0.0302821	456	476	645	699	8.44286	7.68291	11.3056	13.5306
Zfp750	6.25872	0.00164885	1	0	0	20	8	0	0	0.333807	0.147455
Ctss	1.67637	0.00164675	0.0300153	20	23	73	62	0.840801	0.842917	2.90534	2.72501
Tmsb4x	0.387569	0.00164079	0.0299511	1985	2495	3153	2590	119.843	131.316	180.213	163.48
Pecam1	0.365724	0.00163796	0.0299511	1444	1729	2012	1991	22.2354	23.2095	29.3302	32.0525
Tap1	2.49287	0.00153174	0.0283822	8	7	56	28	0.0775247	0.0591346	0.513746	0.283676
Slfn10-ps	1.12869	0.00152576	0.0283141	119	139	187	361	1.87535	1.9096	2.78989	5.9478
Ptk2b	0.39469	0.00150345	0.0280271	1411	1506	1860	1907	19.739	18.3661	24.6332	27.8909
Tcf7l2	1.46535	0.00146589	0.027452	27	39	97	81	0.360007	0.453321	1.22442	1.12914
Pbxip1	0.540095	0.00140615	0.0264541	409	470	628	625	5.07693	5.08592	7.37986	8.11096
Nfatc2	0.677987	0.00138836	0.0261595	262	289	488	380	2.19386	2.1096	3.86847	3.32664
Slc25a20	0.597832	0.00137959	0.0260341	341	370	515	541	10.9347	10.343	15.6339	18.1369
Slc9a8	0.470659	0.00134829	0.0255219	688	777	973	1017	6.29578	6.19835	8.42916	9.72962
Clec2i	0.55237	0.00133885	0.025461	613	670	840	1003	14.5669	13.8795	18.8971	24.9185
Megf8	0.839084	0.00132916	0.0253552	153	207	369	262	0.830582	0.979615	1.89639	1.48698
Orai2	0.509226	0.00129125	0.0247088	658	780	938	1063	8.9552	9.25418	12.0854	15.125
Gm36572	3.66827	0.001201	1	2	2	26	24	0.0384108	0.0334847	0.472723	0.481891
Rinl	0.48102	0.00112279	0.0218597	807	930	1124	1249	15.2427	15.3132	20.0986	24.6641
Tlr1	2.89221	0.00107767	0.0210146	5	4	34	32	0.0863141	0.0601957	0.55565	0.577532
Gm12504	2.01633	0.00106841	0.0209337	11	22	82	48	0.2819	0.491495	1.98942	1.28605
Tom1l2	0.714588	0.00101848	0.0200513	300	298	438	526	3.33963	2.89193	4.61595	6.12177
Casp1	2.68082	0.0009386	0.0186581	6	6	45	31	0.226733	0.197655	1.60985	1.22473
Gba	0.586336	0.000902701	0.018032	379	434	584	612	9.52908	9.51251	13.9006	16.0871
Il12rb1	0.719432	0.000871595	0.017496	276	351	449	557	4.28576	4.75137	6.60047	9.04248
Ube2l6	2.63274	0.00085032	0.0171249	5	20	119	31	0.206108	0.718703	4.6439	1.33598
I830077J02Rik	1.33078	0.000835367	0.0169069	40	62	115	134	1.73519	2.34462	4.72275	6.07723
Gmfg	0.460718	0.000800016	0.016245	1612	2239	2488	2669	39.7607	48.1434	58.0964	68.8258
Il15ra	1.12823	0.00079037	0.0160756	74	73	172	145	2.36364	2.03266	5.20101	4.84207
Itga4	0.558792	0.000784043	0.0159999	5672	5244	6793	9027	32.9835	26.5838	37.3966	54.8805
Tmem229b	0.6003	0.000773633	0.0158401	888	977	1190	1575	10.9918	10.5425	13.9448	20.3821
Tmem173	0.598817	0.000766723	0.0157761	456	487	659	742	11.3256	10.5443	15.495	19.267
H2-K1	1.60876	0.000756834	0.0156527	35	26	103	82	0.938165	0.607545	2.61372	2.29794
1700028J19Rik	2.12736	0.000743819	0.0154355	11	14	57	50	0.529393	0.587364	2.59699	2.51576
Ifi27l2a	2.14995	0.000742385	0.0154318	9	31	115	56	0.77379	2.32346	9.36027	5.03364
Tapbpl	0.492932	0.000734296	0.0152895	642	780	973	985	9.27857	9.8273	13.3128	14.8832
C030034L19Rik	1.78865	0.000732113	0.01527	30	20	71	100	0.547124	0.317972	1.22584	1.90668
1600014C10Rik	0.599157	0.000727147	0.0151922	353	458	622	579	6.04269	6.83463	10.0799	10.3621
Akr1c12	2.70918	0.000713902	0.0149664	8	5	54	31	0.371564	0.202445	2.37437	1.50529
Aldh1b1	0.609363	0.00070475	0.0147997	438	491	786	609	10.8785	10.6309	18.4812	15.8135
H2-Q7	6.45833	0.000699857	1	0	0	20	12	0	0	0.352388	0.233494
Rgs12	0.512233	0.000681558	0.0143865	722	817	1023	1127	7.54799	7.44578	10.1247	12.3178
Samhd1	1.6257	0.00064953	0.0137815	27	47	143	80	0.384965	0.584184	1.93021	1.19251
Grn	0.577252	0.000649516	0.0137815	428	486	723	617	10.4889	10.3829	16.774	15.8083
Zfp385a	0.832775	0.00062908	0.0134171	176	191	364	280	3.95858	3.74502	7.75065	6.58413
Pcmtd1	0.684711	0.000617076	0.013184	473	530	950	640	4.96941	4.85415	9.44882	7.02971
9930111J21Rik1	3.10271	0.000604545	0.0129611	3	5	35	32	0.0444016	0.0645121	0.490406	0.495155
Ipcef1	0.623764	0.000579365	0.0124432	409	419	685	573	3.75773	3.35591	5.95804	5.5039
4930427A07Rik	0.51773	0.000567737	0.0122793	782	979	1374	1098	13.3265	14.5441	22.167	19.5626
2010107G12Rik	0.679316	0.000549965	0.0119581	427	475	624	789	9.79675	9.50039	13.5534	18.9254
Oas1c	1.34701	0.000546209	0.0119186	46	56	148	107	1.15049	1.22098	3.50427	2.79785
Plekhg3	0.679647	0.000543952	0.0118905	260	316	453	450	2.21244	2.34411	3.64927	4.00335
Dtx1	1.52396	0.000517676	0.0113972	986	1258	4222	2140	14.616	16.2565	59.249	33.165
H2-Q5	3.81999	0.000478056	0.0106393	3	3	74	11	0.144259	0.125758	3.3687	0.553002
Csnk1g1	0.73504	0.000458045	0.0102497	798	719	1035	1449	6.13325	4.81737	7.53075	11.6431
Tes	0.750248	0.00044709	0.0100538	208	257	380	385	4.8699	5.24546	8.42268	9.42391
Gm2a	0.571811	0.000446871	0.0100538	614	712	1092	846	8.24645	8.33628	13.8845	11.8791
Baz2b	0.499581	0.000441537	0.00997112	729	779	1073	1023	4.18434	3.8979	5.83055	6.13888
Psme1	0.360803	0.000436093	0.0098663	2618	2891	3588	3362	153.206	147.486	198.779	205.693
Fam65b	0.499796	0.000435719	0.0098663	950	1018	1309	1422	9.37286	8.75569	12.2264	14.6677
Tdrd7	2.15915	0.000434208	0.00985998	12	14	61	53	0.174979	0.177962	0.842065	0.80797
Tecpr1	0.510886	0.000418129	0.00954207	683	861	1067	1083	7.06023	7.75881	10.4417	11.7042
Trib3	2.26997	0.000401253	0.00919662	27	32	238	46	0.752662	0.777643	6.28093	1.34063
Man2b2	0.625316	0.000394687	0.00908002	388	477	627	677	6.46002	6.92331	9.88279	11.7843
Adcy6	0.411175	0.000390466	0.00899975	1691	2007	2365	2448	14.1721	14.6633	18.7643	21.4494
Slc9a9	0.559377	0.000376553	0.00872822	636	697	916	1010	10.4132	9.94843	14.1982	17.2887
Lynx1	1.23982	0.000347182	0.00807791	65	64	152	148	0.940369	0.807159	2.0818	2.23852
Vamp1	0.783279	0.000346153	0.00806924	300	396	506	659	5.43828	6.25791	8.68363	12.4893
Isg15	2.50713	0.000345837	0.00806924	82	95	744	256	6.20146	6.26322	53.2677	20.2411
Utrn	0.480957	0.000341546	0.00799218	1949	1825	2691	2513	8.37276	6.8346	10.9441	11.2866
Ogfrl1	0.931683	0.000339449	0.00795827	146	143	294	250	1.71336	1.46293	3.26627	3.06725
Herc3	0.657794	0.000337413	0.00792565	491	541	719	875	5.32587	5.11564	7.38326	9.92273
Cish	1.71196	0.000336418	0.00792565	69	72	354	107	1.27671	1.16137	6.20094	2.06986
Crebzf	0.573649	0.000333158	0.00787086	1012	1158	1410	1747	10.9938	10.9666	14.501	19.8416
Polr3b	0.457311	0.000329839	0.00780747	973	1119	1417	1399	11.5178	11.5473	15.8794	17.3136
Hrh2	1.70811	0.000312724	0.00748744	23	41	88	114	0.26958	0.418927	0.976457	1.39694
Ifit3	2.28066	0.000305542	0.00735998	10	15	72	47	0.286158	0.374189	1.95052	1.40611
Wdr13	0.708597	0.000278919	0.00678518	286	360	495	536	3.64591	4.0007	5.97386	7.14362
Grina	0.582516	0.000277881	0.00677335	502	672	893	824	14.5104	16.9332	24.4364	24.901
Abi3	0.430034	0.000255069	0.00624207	1427	1723	2069	2084	12.8749	13.5518	17.6721	19.6576
BC147527	1.0885	0.00025425	0.00624207	94	97	213	187	2.00687	1.80533	4.30508	4.17395
Bst2	0.642399	0.000236245	0.00587504	975	1243	2028	1372	72.4904	80.5639	142.743	106.646
Iffo1	0.656564	0.000234402	0.00584103	389	442	612	671	7.34022	7.27069	10.9325	13.2372
Parp4	0.698446	0.000233338	0.00582634	322	330	546	496	2.88064	2.5736	4.6242	4.63905
Capn5	0.708153	0.000220474	0.00555026	1189	1427	2622	1590	15.0266	15.7216	31.3706	21.0083
Acacb	1.18325	0.000219709	0.00554236	95	79	198	193	0.599181	0.434365	1.18225	1.27264
Tmem154	1.0613	0.000219635	0.00554236	95	153	262	241	1.62525	2.28182	4.24333	4.31049
Cyth4	0.768217	0.000209906	0.00532789	269	274	498	414	5.48304	4.86871	9.60968	8.82234
Mettl7a1	1.15871	0.000190864	0.00485457	76	91	181	184	2.28939	2.38969	5.16172	5.79479
Galnt3	1.68009	0.000174094	0.00444646	33	30	98	101	0.512149	0.40588	1.43986	1.63877
Ercc5	0.641348	0.000166492	0.00426115	384	474	693	618	4.34666	4.67732	7.42623	7.31353
Coro7	0.430573	0.000164856	0.00422808	1406	1620	2047	1953	23.0468	23.1491	31.7654	33.4689
Samsn1	0.712128	0.000162123	0.00419301	280	342	517	481	8.67688	9.23901	15.1672	15.5835
Acadl	0.575728	0.000156894	0.00407494	823	924	1444	1119	24.1553	23.6417	40.1227	34.3366
Plcb2	0.462838	0.000156596	0.00407494	1378	1451	1936	1898	10.2413	9.40086	13.6214	14.7474
Rsrp1	0.604362	0.000152211	0.00399554	1469	1672	2038	2628	59.3564	58.8946	77.9579	111.016
Ifit1bl1	3.09993	0.000148535	0.00390738	4	6	49	35	0.0799363	0.104527	0.927023	0.731251
Phf11b	3.32109	0.000142487	0.00378	4	4	48	31	0.161967	0.141196	1.84	1.31233
Psat1	0.494558	0.000139583	0.0037197	4889	5927	8594	6378	121.798	128.721	202.687	166.118
Gimap6	0.549081	0.000136885	0.00365573	762	858	1123	1200	27.0266	26.5288	37.7074	44.4972
Aen	0.625346	0.000136538	0.00365439	748	742	1059	1201	16.5762	14.3344	22.2172	27.8253
Gimap8	1.19488	0.000135117	0.00363219	106	96	200	255	1.65859	1.30948	2.96261	4.17146
Gprin3	1.8759	0.000124524	0.00335478	52	23	160	118	0.267387	0.1031	0.778873	0.634355
Tmem176b	0.901171	0.000123293	0.0033289	176	266	389	413	6.02557	7.93891	12.608	14.7826
Tmem121	1.17529	0.000116139	0.00314265	78	116	205	221	2.77339	3.59557	6.90049	8.21528
Slc25a36	0.581634	0.000114309	0.00309997	689	697	1071	973	7.88653	6.95494	11.6056	11.6438
Trpv2	0.568596	0.000110416	0.00301436	714	872	1106	1193	14.8392	15.7987	21.7609	25.9218
Bax	0.53709	0.000109108	0.00298529	1090	1462	1966	1654	28.0721	32.8239	47.9339	44.5347
Gbp11	2.80215	0.000102103	0.00281242	11	5	66	46	0.231902	0.0918917	1.31725	1.01387
Mta3	0.398045	0.000101785	0.00280996	2404	2829	3432	3325	24.6631	25.3011	33.3327	35.6631
Gbp10	3.50264	0.000101419	0.00280615	3	4	47	31	0.0486177	0.0565103	0.721077	0.52523
Lipg	1.05419	0.000100733	0.00279345	123	150	322	235	1.857	1.9742	4.60228	3.70927
Izumo1r	1.28627	9.45e-05	0.00265045	95	122	199	315	2.1928	2.45488	4.3485	7.60152
Neb	3.09156	9.32e-05	0.00262071	6	5	37	55	0.0146714	0.0106582	0.085651	0.140604
Dgka	0.470219	8.22e-05	0.0023379	1198	1357	1770	1703	22.7558	22.4703	31.8287	33.8193
Gm6545	2.39954	8.14e-05	0.00232131	15	10	68	63	0.488114	0.283677	2.09483	2.14331
Lpp	1.00044	7.42e-05	0.00214681	191	175	329	392	0.697829	0.557375	1.13795	1.49732
Bcl2l14	1.31732	7.31e-05	0.00212172	66	69	173	158	1.69978	1.54914	4.21799	4.25422
Cul9	0.836765	7.29e-05	0.00212172	206	262	409	408	1.39203	1.54339	2.61646	2.8824
Gbp8	0.585027	7.24e-05	0.00211228	697	826	1229	1014	9.0652	9.36522	15.1324	13.7878
Gria3	1.26251	6.6e-05	0.00195977	82	128	293	199	0.88292	1.20147	2.98666	2.24014
Trdv5	1.02119	6.32e-05	0.00188378	135	156	272	306	22.3726	22.5373	42.6739	53.0174
Slfn2	1.00854	5.15e-05	0.00155321	185	258	521	352	6.35654	7.72791	16.9472	12.6446
Mapkapk3	0.968709	5.12e-05	0.00154941	177	173	365	311	3.59371	3.06203	7.01573	6.60152
Vash1	0.871236	4.39e-05	0.0013546	285	311	625	450	2.63285	2.50458	5.46603	4.34618
Casp8	0.560088	4.2e-05	0.00130015	911	985	1343	1401	20.1493	18.992	28.1208	32.3962
Calcoco1	0.816984	3.83e-05	0.00119296	403	525	699	892	8.1591	9.26596	13.3975	18.8806
Lif	2.54214	3.65e-05	0.00114458	21	33	254	57	0.20584	0.28198	2.35697	0.584116
Dzip1	0.820534	3.21e-05	0.00102105	628	672	944	1302	6.57611	6.1344	9.35819	14.2539
Thrb	1.82877	3.19e-05	0.00101943	40	33	159	99	0.192151	0.138194	0.723085	0.4972
Plekha7	0.863609	3.05e-05	0.000977014	750	890	1849	1094	6.9884	7.22937	16.3104	10.6573
Card10	1.5007	3e-05	0.000963648	50	55	154	138	0.599187	0.574578	1.74712	1.72896
Sp140	1.00027	2.91e-05	0.000939619	147	178	311	325	3.4773	3.67062	6.9646	8.03753
Cars	0.657564	2.62e-05	0.000859077	1294	1477	2521	1785	22.9621	22.8481	42.3506	33.1153
Gm34004	3.05862	2.59e-05	0.00084932	11	4	77	49	0.2282	0.0723397	1.51225	1.06275
Stat4	0.792792	2.58e-05	0.00084932	285	376	560	558	5.44974	6.26776	10.1375	11.1552
Ms4a6b	0.714942	2.54e-05	0.000837706	802	802	1171	1415	27.1807	23.6949	37.5711	50.1369
Mst1r	2.16991	2.49e-05	0.000832403	26	16	93	95	0.308923	0.165726	1.04609	1.18009
Vim	0.791268	2.45e-05	0.000821437	854	938	1864	1199	26.6232	25.4917	55.0122	39.0783
Ikbke	0.674654	2.32e-05	0.000780664	523	660	890	954	8.95545	9.85198	14.4273	17.0784
Tcp11l2	1.22048	2.28e-05	0.000769648	97	99	221	228	2.3108	2.05598	4.98418	5.67858
Cd3d	0.493166	2.22e-05	0.000752458	2395	2837	3973	3258	102.957	106.317	161.689	146.425
D8Ertd82e	0.765258	2.11e-05	0.000717129	326	399	649	559	3.72628	3.9758	7.02285	6.68012
S100a11	0.98394	2.05e-05	0.000701908	180	212	430	332	20.4195	20.9653	46.1796	39.3753
Qsox1	0.684201	2.03e-05	0.000700018	459	508	805	722	7.80812	7.5334	12.964	12.8406
Gbp5	1.70202	1.98e-05	0.000684588	42	42	157	113	0.794878	0.692938	2.81295	2.23586
Tgfbr2	0.685923	1.89e-05	0.000654479	472	578	893	763	5.63625	6.01685	10.0951	9.52547
Tuba8	1.40358	1.79e-05	0.000624697	68	88	177	225	2.64661	2.98577	6.52175	9.15539
Nfkbie	0.49547	1.68e-05	0.000589808	1368	1579	2132	1945	32.0815	32.2808	47.3332	47.6872
Treml2	0.633098	1.63e-05	0.000577553	846	826	1332	1226	10.2608	8.73346	15.2942	15.5459
Cdkn1a	1.6216	1.56e-05	0.000553419	128	164	648	241	3.76651	4.20695	18.0516	7.41413
Lfng	1.38633	1.52e-05	0.000542656	71	79	178	206	1.77731	1.72396	4.21829	5.39122
Lrp1	1.46875	1.5e-05	0.000537053	189	164	678	299	0.725623	0.548892	2.46427	1.20015
Enc1	0.883696	1.49e-05	0.000536703	277	311	606	462	3.33909	3.26816	6.91563	5.82244
Tubb3	0.640254	1.48e-05	0.000533415	653	741	1033	1096	21.6686	21.4353	32.451	38.0226
Aldh18a1	0.656543	1.39e-05	0.000503947	2714	2823	5072	3556	43.9953	39.8934	77.837	60.266
Cd37	0.832652	1.39e-05	0.000503644	373	436	636	772	11.148	11.3597	17.9951	24.1223
Oas1b	1.67483	1.38e-05	0.000499764	48	44	132	157	1.49151	1.19187	3.88301	5.10033
Tnfsf4	3.84074	1.32e-05	0.000486151	2	5	64	34	0.0710683	0.154885	2.15296	1.2631
Baiap3	1.96324	1.18e-05	0.000439693	47	30	188	113	0.5519	0.307098	2.08992	1.38725
Gm12185	6.82504	1.14e-05	0.000425216	0	1	56	55	0	0.00942016	0.572879	0.621357
Rab37	1.0465	1.05e-05	0.000394285	166	186	332	380	2.77757	2.71309	5.25903	6.64744
Cd53	1.11999	1.04e-05	0.00039363	156	225	476	334	3.18316	4.00231	9.19499	7.12516
Gpt2	1.43608	1.04e-05	0.00039363	129	145	491	243	1.52924	1.49846	5.51032	3.01165
LOC100861913	1.87077	9.57e-06	0.000365106	33	45	112	165	0.402294	0.478229	1.29258	2.10294
Il2ra	2.50191	9.23e-06	0.000354477	1194	1464	10541	4361	15.417	16.4789	128.851	58.8701
Maf	1.39282	8.85e-06	0.000340823	66	96	200	214	1.03611	1.31379	2.97237	3.51229
Trim25	0.535167	8.39e-06	0.000324158	1640	1716	2544	2246	16.807	15.3305	24.6816	24.0641
Impact	0.748101	7.33e-06	0.000284789	381	469	726	672	4.21099	4.51883	7.59638	7.76503
Arrdc4	2.40566	6.83e-06	0.000267157	19	23	73	143	0.278328	0.293714	1.01236	2.19005
Itgb7	1.09185	6.75e-06	0.00026485	139	169	351	293	2.54883	2.70151	6.09317	5.61704
Ifitm3	2.1732	6.17e-06	0.000245937	30	34	198	88	2.64697	2.61517	16.5387	8.11753
Trp53inp1	0.79261	5.26e-06	0.000211264	2289	2554	3379	4812	24.1017	23.4432	33.6822	52.9715
Cd163l1	0.8669	5.18e-06	0.000208619	334	458	661	745	4.48796	5.3649	8.40842	10.4658
Cdh1	2.27661	4.31e-06	0.000174768	46	61	401	113	0.593417	0.686003	4.8973	1.52403
Adgrd1	3.43958	4.2e-06	0.000170905	5	10	122	38	0.0553694	0.096537	1.279	0.439944
Dnmt3b	0.619828	4.1e-06	0.000167961	893	1096	1459	1529	9.5612	10.2298	14.7886	17.1152
Arap2	1.04677	4.08e-06	0.000167522	174	182	364	359	1.35113	1.232	2.67583	2.91444
Hsh2d	1.49148	4.05e-06	0.000167024	95	71	250	214	4.43394	2.8888	11.0463	10.4422
Acox3	0.942771	3.52e-06	0.000145398	290	368	558	675	3.46006	3.8276	6.30275	8.41983
Pqlc3	0.862744	3.35e-06	0.000139042	378	383	646	714	11.2095	9.90119	18.1358	22.1364
Mx1	3.43651	3.25e-06	0.000135725	3	11	100	47	0.0635978	0.203286	2.00693	1.04168
Parp8	1.22235	3.09e-06	0.000129417	118	121	287	262	0.878347	0.785169	2.02244	2.03892
Ern1	1.02174	3.05e-06	0.000128662	190	200	406	373	2.73218	2.50714	5.52703	5.60762
Khdc1a	3.67599	3e-06	0.00012715	5	5	90	37	0.146601	0.1278	2.49816	1.13418
Rasgrp1	0.570195	2.7e-06	0.000116474	3176	3245	4491	4881	35.5702	31.6822	47.6167	57.1517
Leng8	0.62526	2.62e-06	0.000113143	2114	2481	3183	3744	23.7273	24.2752	33.8213	43.9332
Prkcq	0.6364	2.46e-06	0.000108019	1143	1299	1760	1957	19.7254	19.5427	28.7544	35.309
Sh3bp5	1.26135	2.36e-06	0.000104244	128	180	428	295	2.75022	3.3715	8.70585	6.62664
5830418P13Rik	0.943993	2.26e-06	0.000100137	241	338	572	515	6.32647	7.7349	14.2151	14.134
Mirt1	1.64954	2.03e-06	9.09e-05	61	54	196	161	0.65904	0.508592	2.0047	1.81854
Rnasel	0.766595	2.01e-06	9e-05	448	560	824	852	4.85392	5.28928	8.45186	9.65092
Cmah	0.788789	1.96e-06	8.82e-05	894	1005	1417	1791	5.15834	5.05513	7.7402	10.8039
Cblb	0.704008	1.92e-06	8.69e-05	899	975	1687	1321	6.26445	5.92273	11.1288	9.62366
Gbp3	1.33981	1.5e-06	6.87e-05	175	159	519	321	3.29238	2.60773	9.24377	6.31379
Slc1a4	1.6001	1.3e-06	6.03e-05	89	138	437	237	1.29611	1.75196	6.02481	3.6084
Pglyrp2	0.851742	1.21e-06	5.67e-05	432	472	748	851	8.76797	8.35124	14.3723	18.0575
Gimap4	1.4969	1.09e-06	5.15e-05	69	78	206	201	2.17958	2.14789	6.16029	6.63794
Trafd1	0.884055	1.03e-06	4.92e-05	392	487	902	690	8.69034	9.41182	18.9307	15.9924
Pck2	1.87329	8.68e-07	4.2e-05	77	90	423	183	1.29483	1.31935	6.73401	3.21728
Gm19696	2.93878	8.13e-07	3.96e-05	7	15	94	70	0.104089	0.194442	1.32326	1.08822
Sytl1	0.872787	8.03e-07	3.93e-05	386	508	758	838	11.4646	13.1531	21.3133	26.0213
Nkg7	2.22959	7.85e-07	3.86e-05	36	37	233	107	2.53171	2.26833	15.5124	7.867
Blk	0.895246	7.33e-07	3.62e-05	318	344	642	569	7.34605	6.92754	14.0402	13.7421
Cd93	1.13506	6.96e-07	3.45e-05	199	238	417	520	1.71403	1.78705	3.40025	4.68255
H2-T24	2.99719	6.5e-07	3.25e-05	7	18	126	68	0.0911666	0.204364	1.55353	0.925892
Eif4ebp1	1.48324	6.4e-07	3.21e-05	257	330	1118	502	14.9784	16.7664	61.6858	30.588
Mzb1	2.16416	5.83e-07	2.93e-05	31	49	126	220	1.31582	1.81311	5.06309	9.76273
Parp10	0.748929	5.51e-07	2.78e-05	567	729	1130	1001	9.54872	10.7025	18.0157	17.6242
Mx2	3.12032	5.47e-07	2.77e-05	11	13	151	56	0.259669	0.267525	3.37454	1.38207
Trim12c	1.06287	4.18e-07	2.17e-05	207	217	444	427	3.16786	2.895	6.43263	6.83183
Gm1966	2.60275	3.92e-07	2.04e-05	15	16	95	90	0.0957269	0.0890136	0.573953	0.600481
St6gal1	0.875856	3.57e-07	1.87e-05	336	423	707	656	4.26145	4.67684	8.48883	8.69833
Sema4a	1.35632	2.2e-07	1.2e-05	243	230	759	444	2.45206	2.02324	7.25066	4.68406
Itgb3	1.37087	2.18e-07	1.19e-05	141	120	327	340	1.38921	1.03068	3.05005	3.50221
Ifi44	4.8466	2.04e-07	1.13e-05	1	5	136	33	0.0196543	0.0856687	2.53051	0.678088
AW112010	1.56951	2.03e-07	1.13e-05	68	111	280	237	5.0166	7.13867	19.5555	18.2794
A230050P20Rik	0.755468	1.64e-07	9.31e-06	622	788	1235	1095	11.2861	12.4645	21.2144	20.7722
Cd3g	0.616477	1.51e-07	8.67e-06	6227	7341	11511	8934	348.021	357.664	609.046	522.019
Gm42047	1.04505	1.27e-07	7.4e-06	775	666	1286	1647	13.5796	10.1731	21.3322	30.1712
Drc1	2.36725	1.13e-07	6.6e-06	23	25	140	104	0.500385	0.474144	2.88347	2.36551
Ccdc109b	1.14226	8.94e-08	5.25e-06	214	236	550	428	9.28326	8.92467	22.5871	19.4108
Ms4a4b	1.71233	8.8e-08	5.22e-06	56	86	213	239	2.54311	3.40462	9.15728	11.3472
Asns	3.86304	8.75e-08	5.22e-06	42	51	1002	341	1.13163	1.1979	25.5585	9.60561
Ifi35	1.16676	7.63e-08	4.6e-06	205	258	582	438	8.61821	9.45533	23.1631	19.2509
Clec2d	1.71576	6.45e-08	3.9e-06	85	97	233	350	4.00315	3.98244	10.3884	17.2332
Rnr1	0.669337	6.21e-08	3.78e-06	4315	5245	6860	7982	258.333	273.74	388.806	499.602
Trim12a	1.15517	6.11e-08	3.73e-06	176	209	425	415	4.67598	4.84061	10.6895	11.5271
Pdgfrb	0.876447	5.75e-08	3.53e-06	461	622	962	977	4.86928	5.72728	9.61943	10.7888
Trim34a	1.78257	3.03e-08	1.94e-06	51	72	213	200	0.985433	1.21278	3.89625	4.04018
Anxa6	0.580348	2.17e-08	1.44e-06	2092	2498	3455	3269	44.9489	46.789	70.2774	73.4321
Slfn5	2.40529	1.95e-08	1.3e-06	27	30	183	115	0.245618	0.23791	1.57601	1.09373
Eif2ak2	0.89504	1.9e-08	1.28e-06	532	568	1106	909	7.03116	6.54422	13.8382	12.5601
Adam19	3.33602	1.84e-08	1.24e-06	8	26	94	231	0.0714123	0.202325	0.794367	2.1558
Hmcn2	3.31308	1.61e-08	1.09e-06	10	9	114	73	0.0361543	0.0283659	0.390189	0.275929
Prr13	1.02403	1.6e-08	1.09e-06	289	344	619	641	13.4446	13.9509	27.2616	31.1761
Unc93b1	1.8074	1.2e-08	8.28e-07	77	99	379	227	1.94282	2.17756	9.05298	5.988
Glipr1	1.10497	1.14e-08	8.03e-07	235	263	529	522	10.5133	10.257	22.4046	24.4149
Firre	0.905778	1.12e-08	7.94e-07	468	508	965	834	4.60149	4.35421	8.98235	8.57299
Il7r	1.22052	7.96e-09	5.72e-07	601	720	1189	1807	10.5664	11.0351	19.7899	33.2142
Cox6a2	4.80272	5.42e-09	4.03e-07	3	3	113	53	0.260278	0.226899	9.28123	4.80736
Epha2	2.83181	5.06e-09	3.79e-07	23	16	172	105	0.334439	0.202816	2.3677	1.59622
Slc5a9	0.855376	3.77e-09	2.84e-07	730	807	1303	1423	9.57279	9.22535	16.176	19.509
Zfp365	1.65348	3.24e-09	2.49e-07	109	98	367	278	1.46395	1.14741	4.66632	3.90353
Cmpk2	2.10328	2.77e-09	2.16e-07	75	63	381	210	1.34465	0.98465	6.4667	3.93623
Parp12	1.22603	2.75e-09	2.16e-07	234	266	654	497	4.14333	4.10591	10.9628	9.20035
Slc7a3	3.59462	2.59e-09	2.05e-07	12	15	251	73	0.246265	0.268353	4.87646	1.56624
Atp8b4	1.53378	2.4e-09	1.93e-07	329	319	1213	652	3.30065	2.78989	11.5206	6.83857
Pld4	3.02646	2.2e-09	1.79e-07	127	160	1572	737	3.67096	4.03171	43.0169	22.2719
Helz2	0.863815	1.77e-09	1.45e-07	1394	1485	2948	2221	7.79855	7.24221	15.6131	12.9901
2700054A10Rik	2.30018	1.42e-09	1.18e-07	38	32	182	159	0.499685	0.366823	2.26566	2.18587
Trim30d	3.05245	1.29e-09	1.09e-07	15	14	142	96	0.228211	0.185681	2.04524	1.52697
Ddx60	2.46003	4.76e-10	4.18e-08	30	42	242	147	0.286158	0.349244	2.1853	1.46594
Lgals9	0.554959	3.81e-10	3.41e-08	7137	8049	11173	10723	257.285	252.95	381.311	404.138
Tshz2	2.5353	3.53e-10	3.19e-08	30	50	295	159	0.188467	0.273827	1.75447	1.0443
Shisa5	0.829562	2.98e-10	2.71e-08	1459	1785	3167	2491	43.3789	46.2652	89.1418	77.4302
Ppt1	0.733579	2.21e-10	2.03e-08	1983	2068	3534	3102	45.4781	41.3451	76.7285	74.3765
H2-T23	0.991019	1.69e-10	1.57e-08	552	775	1355	1218	20.5605	25.1645	47.7797	47.4302
Sox13	1.08275	1.08e-10	1.02e-08	711	976	1569	1904	11.5094	13.7729	24.0444	32.2227
Slc6a9	2.91114	9.42e-11	8.9e-09	23	28	254	125	0.401899	0.426521	4.20178	2.28356
Rnf213	0.981985	7.31e-11	7.07e-09	3933	3788	8821	6293	13.2688	11.1407	28.1733	22.1963
Irgm1	1.22911	6.38e-11	6.22e-09	300	287	695	662	7.70199	6.42329	16.8918	17.7686
Dhx58	2.39356	6.1e-11	6e-09	62	71	472	220	1.46966	1.46716	10.592	5.45207
Tm6sf1	1.05616	5.87e-11	5.82e-09	538	676	1394	1082	13.769	15.082	33.7747	28.9508
Uaca	0.957527	5.21e-11	5.2e-09	555	697	1268	1113	6.12584	6.70654	13.2496	12.8434
Cd82	1.23521	4.32e-11	4.35e-09	887	975	2661	1670	26.4134	25.3104	75.0164	51.9914
Pydc4	4.09715	3.53e-11	3.58e-09	7	9	193	78	0.136548	0.153046	3.56413	1.59072
Gbp2	1.37557	3.02e-11	3.09e-09	177	199	500	458	4.12215	4.04015	11.0238	11.1514
Fam212b	1.82131	2.62e-11	2.71e-09	91	145	363	445	1.02198	1.41958	3.85937	5.22484
Tmsb10	0.766751	2.08e-11	2.17e-09	2265	2941	4270	4374	203.297	230.118	362.828	410.445
Rxfp1	3.16163	1.88e-11	1.97e-09	13	21	124	171	0.0982379	0.13834	0.88709	1.35097
Irf9	1.29474	1.27e-11	1.36e-09	373	451	1170	818	8.3796	8.83252	24.8834	19.2124
Ptpn14	1.1606	1.11e-11	1.19e-09	740	1019	1701	2119	3.9372	4.72632	8.56781	11.7869
Isg20	2.14213	7.73e-12	8.41e-10	70	68	363	240	2.83443	2.40032	13.915	10.16
Rpl3	0.881983	7.42e-12	8.14e-10	3871	4829	8973	6761	150.457	163.621	330.17	274.735
Txnip	0.736966	4.36e-12	4.96e-10	1786	1995	3188	3000	36.4561	35.4998	61.6052	64.0213
Psrc1	1.11846	3.59e-12	4.12e-10	511	611	1346	1047	16.7716	17.4819	41.8224	35.9265
Kbtbd11	1.33488	1.4e-12	1.66e-10	938	992	1960	2802	7.62543	7.03019	15.0844	23.8146
Bcl2	1.23335	1.12e-12	1.35e-10	393	377	946	841	3.11688	2.60653	7.10278	6.97328
Irf7	2.33087	7.31e-13	8.89e-11	114	142	881	392	3.50613	3.80719	25.6513	12.6044
Dpp4	0.767342	4.19e-13	5.15e-11	1777	2053	3341	3056	19.2861	19.424	34.3276	34.6756
Ptp4a3	0.8783	4.19e-13	5.15e-11	2418	3220	5512	4621	36.3046	42.1458	78.3474	72.5363
Rsad2	2.88512	4e-13	5.01e-11	32	40	349	176	0.483377	0.526732	4.99082	2.77948
Notch3	0.933778	3.02e-13	3.82e-11	2394	2888	5612	4299	16.9066	17.7796	37.5197	31.7404
Adar	0.819903	1.99e-13	2.54e-11	1441	1653	2825	2537	13.7543	13.7544	25.5273	25.3169
Ly6a	2.48163	1.86e-13	2.4e-11	44	80	413	262	2.51066	3.9794	22.3098	15.6297
Apobec3	0.968406	9.5e-14	1.24e-11	1386	1519	2631	2941	17.1709	16.4052	30.8576	38.0925
Oas3	2.69219	9.08e-14	1.2e-11	50	39	356	217	0.605918	0.412005	4.08418	2.74927
Pyhin1	2.37897	8.89e-14	1.19e-11	44	70	333	246	0.719381	0.997696	5.1542	4.2049
Oasl1	3.07369	6.09e-14	8.22e-12	26	38	354	176	0.656307	0.836202	8.45955	4.64473
Uba7	1.15144	5.9e-14	8.05e-12	419	486	1042	931	7.57625	7.66073	17.8369	17.5996
Ifit1	3.63044	4.3e-14	5.94e-12	14	20	283	132	0.303428	0.377877	5.80663	2.99099
Parp9	1.23375	2.11e-14	3.06e-12	551	656	1590	1200	8.83926	9.17407	24.1475	20.1261
Dtx3l	0.98991	1.79e-14	2.61e-12	1197	1198	2482	2209	13.2094	11.5249	25.9299	25.4858
Oas1a	3.57305	1.67e-14	2.48e-12	23	21	370	152	0.696142	0.554094	10.6019	4.80981
Akr1c13	1.68482	9.72e-15	1.46e-12	158	183	607	471	6.47567	6.53842	23.552	20.1819
Oasl2	3.59464	5.09e-15	7.81e-13	13	37	393	193	0.237011	0.58806	6.78311	3.67873
Zmat3	1.77145	3.6e-15	5.61e-13	182	156	562	578	1.28768	0.962178	3.76429	4.27542
Rn18s-rs5	0.881375	2.25e-15	3.54e-13	22388	23060	39260	43019	692.278	621.61	1149.28	1390.72
Lgals3bp	0.940656	1.89e-15	3.05e-13	2126	2325	4631	3781	56.0668	53.4515	115.619	104.247
Zbp1	2.13562	1.71e-15	2.85e-13	101	115	568	368	2.90474	2.88322	15.4648	11.0649
Sp100	1.14313	1.48e-15	2.52e-13	654	732	1653	1358	12.2839	11.9857	29.3928	26.6668
Mndal	0.95981	8.38e-16	1.45e-13	1184	1307	2539	2225	22.3562	21.5137	45.3857	43.9228
H2-T22	1.18511	2.92e-16	5.13e-14	684	741	1762	1429	11.1608	10.5402	27.2179	24.3772
Gbp7	1.42769	1.58e-16	2.85e-14	479	423	1239	1161	4.87132	3.75012	11.9287	12.344
H2-Q4	1.51671	1.07e-16	1.96e-14	398	476	1443	1017	6.99952	7.2977	24.0249	18.6991
Xaf1	2.70686	7.14e-17	1.35e-14	68	56	505	301	1.49648	1.07435	10.5212	6.92538
Ddx58	1.54099	1.05e-17	2.26e-15	298	315	977	781	3.44689	3.17626	10.6983	9.44445
Stat1	1.19175	1.02e-17	2.23e-15	1389	1482	3674	2795	15.3667	14.2929	38.4795	32.3277
Pydc3	3.18584	7.1e-18	1.59e-15	25	41	365	223	0.478527	0.684139	6.61409	4.46258
Samd9l	1.64114	6.6e-18	1.5e-15	279	267	930	753	2.99337	2.49725	9.44604	8.44628
Oas2	3.8087	3.51e-18	8.14e-16	21	32	524	208	0.301447	0.400438	7.12088	3.12154
Ccnd2	1.08758	6.41e-19	1.64e-16	1247	1422	2680	2876	11.3783	11.3111	23.1503	27.4356
Gbp4	1.09592	4.53e-19	1.18e-16	909	1123	2239	2015	11.3302	12.2024	26.4203	26.258
Gm8995	1.58935	1.57e-19	4.29e-17	946	839	2367	2928	6.82314	5.27532	16.1622	22.0789
Ifi27	2.27535	1.13e-19	3.14e-17	265	309	1808	939	11.5658	11.7566	74.7033	42.846
Ifi203	1.36051	8.21e-20	2.34e-17	431	470	1149	1123	2.58738	2.45966	6.53	7.04817
Slfn8	1.67671	4.96e-20	1.45e-17	227	239	735	729	3.23575	2.96989	9.91852	10.864
Plac8	1.38113	1.89e-20	5.81e-18	1248	1545	4155	2991	23.5103	25.3726	74.1011	58.9079
Mllt4	1.08545	1.01e-20	3.27e-18	1704	2046	4265	3544	9.35073	9.78758	22.1567	20.3322
Ifih1	2.17063	7.99e-21	2.65e-18	127	137	679	493	1.31567	1.23725	6.6592	5.33953
Coro2a	1.6287	5.96e-21	2.03e-18	662	603	1760	2094	9.20464	7.30903	23.1671	30.4397
Trgv2	1.4183	3.15e-21	1.11e-18	1016	940	2471	2684	165.969	133.861	382.135	458.385
Igfbp4	1.61885	3.08e-21	1.11e-18	248	294	847	785	6.8532	7.08244	22.1582	22.6791
LOC102639543	3.35291	1.16e-21	4.32e-19	35	56	599	313	0.58121	0.810675	9.41678	5.43405
Trim30a	2.15115	5.74e-22	2.2e-19	174	176	909	628	2.58131	2.27613	12.7663	9.74011
Tcrg-C2	1.39452	3.51e-22	1.39e-19	2543	2349	5912	6766	289.055	232.761	636.178	804.045
9030617O03Rik	1.94041	1.69e-22	6.93e-20	156	201	726	616	2.76222	3.10259	12.1697	11.4033
B2m	1.17762	6.56e-23	2.78e-20	7825	8616	20759	15890	521.434	500.512	1309.58	1107.01
Ly6d	1.11441	3.21e-23	1.46e-20	2132	2682	4971	5208	176.405	193.453	389.384	450.515
Sell	1.09105	2.15e-23	1.02e-20	1887	1976	4188	3911	40.1968	36.6944	84.4572	87.1007
Parp14	1.85323	1.44e-23	7.08e-21	394	399	1662	1171	2.27176	2.00554	9.07208	7.05889
Tgtp1	3.07307	1.07e-23	5.47e-21	45	37	340	341	0.915931	0.656517	6.55148	7.25636
Tgtp2	2.19396	5.93e-25	3.17e-22	114	159	638	582	2.31459	2.81423	12.2631	12.354
Tcrg	1.4983	4.88e-25	2.73e-22	2302	2042	5815	6308	0.737611	0.570389	1.76393	2.11314
Gbp6	1.82762	3.2e-25	1.87e-22	373	375	1495	1128	4.71503	4.13238	17.8907	14.9073
Gbp9	1.53113	1.32e-25	8.98e-23	536	560	1693	1428	5.46851	4.98065	16.352	15.2316
Epsti1	2.42424	9.35e-27	7.18e-24	122	121	732	556	3.71421	3.21133	21.0973	17.6968
Iigp1	4.63376	3.99e-27	3.27e-24	8	14	288	246	0.144062	0.219776	4.90977	4.63135
Gfra1	2.25813	6.59e-28	6.23e-25	123	165	726	622	1.42762	1.6695	7.97728	7.54766
Rtp4	2.6605	6.46e-29	7.21e-26	117	123	899	600	3.90737	3.58094	28.4229	20.949
Usp18	2.65484	1.04e-31	1.28e-28	81	110	634	543	2.61498	3.09578	19.3768	18.3273
Ccng1	1.33556	1.58e-33	2.16e-30	1211	1342	3219	3107	19.8561	19.1821	49.9668	53.2605
Nlrc5	2.8131	4.46e-37	9.14e-34	170	141	1258	913	1.27705	0.923365	8.94646	7.17043
5830411N06Rik	1.58396	1.1e-44	4.52e-41	1061	1264	3399	3425	16.6563	17.2983	50.5154	56.213
