# Supplementary material for: Zinc finger protein Zfp335 controls early T-cell development and survival through β-selection-dependent and -independent mechanisms
Source: eLife. 2022 Feb 3;11:e75508. doi: 10.7554/eLife.75508 (PMC8871394; doi:10.7554/eLife.75508)
Supplement: Supplementary file 2. [file elife-75508-supp2.xlsx]

## Sheet: Sheet1
chr	start	end	#raw_read_1	#raw_read_2	M_value_rescaled	A_value_rescaled	#NAME?	gene id(symbol)
NC_000068.7	121473960	121474458	9	0	3.40171	1.70086	3.61236	100008564(Gm14018),100034361(Mfap1b)
NC_000077.6	109362294	109363619	65	8	2.39997	4.36991	7.18448	100036768(Gm11696),14674(Gna13)
NC_000080.6	118937512	118938716	47	11	1.61904	4.39448	3.52967	100037258(Dnajc3)
NC_000077.6	98809539	98810211	26	4	2.221	3.43243	3.51	100037262(Gm12359),192160(Casc3)
NC_000082.6	91688114	91689235	48	8	2.05777	4.19881	4.701	100038392(Gm10785),60364(Donson)
NC_000076.6	127195429	127196526	48	10	1.76826	4.34356	3.8843	100038591(F420014N23Rik),80904(Dtx3)
NC_000076.6	53379178	53380227	41	6	2.24322	3.92897	4.76955	100038725(Cep85l)
NC_000070.6	124553405	124553772	11	0	3.61119	1.8056	3.91339	100039332(Gm2164)
NC_000069.6	51559970	51560814	33	6	2.00044	3.80757	3.6551	100039684(5031434O11Rik),73251(Setd7)
NC_000072.6	147719847	147720275	7	0	3.14533	1.57266	3.0103	100039736(Gm15762)
NC_000085.6	8774127	8775096	39	6	2.18716	3.90094	4.5421	100039957(Gm2518),225895(Taf6l),67706(Tmem179b)
NC_000079.6	54503462	54504539	43	10	1.6446	4.28173	3.30472	100040543(Gm2830),319719(Simc1)
NC_000073.6	51861434	51862394	26	4	2.221	3.43243	3.51	100040608(Fancf),14453(Gas2)
NC_000068.7	19657501	19658886	78	14	1.86958	4.84168	5.95725	100041244(Gm3230),71198(Otud1)
NC_000084.6	34759260	34759863	16	2	2.42642	2.79817	3.53488	100041879(Gm3561),66306(Fam53c)
NC_000084.6	36017804	36018864	39	8	1.82459	4.08222	3.64935	100042150(Nrg2)
NC_000076.6	53596434	53598000	64	11	1.96739	4.56866	5.52586	100042554(Gm3902),66403(Asf1a),71567(Mcm9)
NC_000073.6	112023254	112024153	39	6	2.18716	3.90094	4.5421	100042678(Gm3960),74996(Usp47)
NC_000068.7	93014533	93015508	50	7	2.27366	4.13683	5.62876	100042784(Prdm11)
NC_000077.6	23067754	23068202	12	1	2.70316	2.35158	3.36932	100042875(Gm12059)
NC_000082.6	30008794	30009477	28	6	1.81768	3.71619	3.01816	100043102(4632428C04Rik)
NC_000080.6	75844776	75845926	45	10	1.69567	4.30727	3.68844	100043189(Gm4285),22070(Tpt1)
NC_000068.7	118745415	118746645	54	8	2.19049	4.26517	5.58075	100043272(Inafm2)
NC_000078.6	21417015	21417847	40	8	1.85297	4.09641	3.8548	100043407(Gm4419),22630(Ywhaq)
NC_000073.6	127511999	127513431	63	4	3.21261	3.92823	9.29913	100043597(Srcap),629159(1700008J07Rik)
NC_000078.6	40037170	40038431	62	10	2.05701	4.48794	5.74704	100043606(Arl4aos),11861(Arl4a)
NC_000068.7	173586488	173587150	15	1	2.94173	2.47087	3.91339	100043911(Ppp4r1l-ps)
NC_000076.6	77417569	77418465	34	7	1.8411	3.92055	3.43645	100045653(Gm17769),110532(Adarb1)
NC_000070.6	151861070	151862756	72	6	2.87836	4.24654	9.12986	100072(Camta1),102631977(9230110K08Rik),105247222(Gm42357)
NC_000070.6	132345106	132345977	37	3	2.93559	3.46779	6.12934	100088(Rcc1)
NC_000081.6	89429177	89429813	21	3	2.30762	3.15381	3.35694	100134861(Gm44502),12651(Chkb)
NC_000085.6	45998052	45998685	20	2	2.66921	2.91957	3.75443	100174921(4930505N22Rik),71617(Armh3)
NC_000070.6	126321335	126321920	16	1	3.01139	2.50569	4.18809	100206(Adprhl2)
NC_000070.6	117155541	117156645	31	5	2.15317	3.66155	3.91086	100216533(Snord55),20116(Rps8)
NC_000084.6	11839241	11841208	76	23	1.16205	5.16599	3.08956	100316686(Mir1901),621998(Gm6277),63955(Cables1)
NC_000078.6	40222671	40223281	26	4	2.221	3.43243	3.51	100316693(Mir1938),15982(Ifrd1)
NC_000084.6	6489748	6491274	57	7	2.42143	4.21072	6.55886	100316773(Mir1893),13831(Epc1)
NC_000067.6	63113193	63114672	79	18	1.543	5.01943	4.5685	100380944(Ino80dos),227195(Ino80d)
NC_000070.6	16162929	16164165	31	6	1.93078	3.77274	3.43979	100415915(A530072M11Rik),192656(Ripk2)
NC_000082.6	10834938	10835687	30	4	2.37973	3.51179	4.21584	100416094(Gm17913),223970(Rmi2)
NC_000086.7	150366845	150367474	22	2	2.77374	2.97183	4.27364	100417275(Gm15105)
NC_000070.6	53440042	53441213	68	18	1.37304	4.93445	3.53754	100434(Slc44a1),108168953(Gm46858)
NC_000068.7	32712025	32713530	75	6	2.92463	4.26967	9.63706	100499514(Mir2861),100628606(Mir3960),107951(Cdk9)
NC_000068.7	120850016	120850782	37	8	1.76566	4.05276	3.44661	100502700(AV039307),140810(Ttbk2)
NC_000082.6	33380416	33381674	55	11	1.79615	4.48304	4.50079	100502742(1700007L15Rik),22661(Zfp148)
NC_000067.6	127773757	127774311	15	1	2.94173	2.47087	3.91339	100502745(2900009J06Rik),72949(Ccnt2)
NC_000084.6	78030878	78031250	9	0	3.40171	1.70086	3.61236	100502841(Epg5)
NC_000068.7	170511156	170511833	30	2	3.11669	3.14331	5.60081	100502946(Gm16796),109054(Pfdn4)
NC_000085.6	43674348	43675277	41	6	2.24322	3.92897	4.76955	100502982(BC037704),246696(Slc25a28)
NC_000067.6	87853009	87854041	46	12	1.47937	4.44013	3.02796	100503175(Gm19582),102642389(Gm38609),227333(Dgkd)
NC_000085.6	46305246	46305996	19	2	2.61315	2.89154	3.498	100503392(4833438C02Rik),18034(Nfkb2)
NC_000075.6	22070620	22071592	38	8	1.79551	4.06768	3.44661	100503652(Gm16845),26940(Ecsit),319601(Zfp653)
NC_000072.6	115134666	115135643	34	7	1.8411	3.92055	3.43645	100503783(Gm17733),20965(Syn2)
NC_000072.6	31398611	31399576	39	9	1.67259	4.15822	3.2721	100503869(Mkln1os),27418(Mkln1)
NC_000077.6	78032021	78032830	43	5	2.51907	3.8445	5.55481	100504178(Dhrs13os),70451(Dhrs13)
NC_000081.6	79741899	79742847	48	11	1.64273	4.40633	3.52967	100504191(Gm16576),223697(Sun2)
NC_000068.7	156613342	156614547	51	11	1.71101	4.44047	3.91087	100504350(Gm14169),228836(Dlgap4)
NC_000078.6	76403471	76403904	11	1	2.61119	2.3056	3.10048	100504512(4930426I24Rik),15512(Hspa2)
NC_000076.6	127041587	127042263	19	2	2.61315	2.89154	3.498	100504608(Eef1akmt3),17299(Mettl1)
NC_000081.6	82898593	82900095	87	22	1.37687	5.212	4.27513	100504637(Gm20324),21411(Tcf20)
NC_000079.6	111807716	111809817	116	24	1.58384	5.43578	6.28978	100504675(Gm15327),26401(Map3k1)
NC_000078.6	111574301	111575056	26	4	2.221	3.43243	3.51	100504687(2810029C07Rik),17169(Mark3)
NC_000067.6	132190064	132191404	54	14	1.45352	4.63365	3.30766	100505034(Gm29695),213409(Lemd1)
NC_000069.6	68493532	68494903	54	15	1.36041	4.68021	3.02569	100505386(Iqschfp),30953(Schip1)
NC_000083.6	10318275	10320344	72	11	2.10075	4.63534	6.378	100526796(Cahm),108168358(Gm46608),19317(Qk)
NC_000071.6	63968150	63969286	58	11	1.85611	4.51302	4.70185	100532(Rell1)
NC_000075.6	21073064	21073728	20	3	2.25417	3.12709	3.11807	100568458(Gm38431),68165(Fdx1l)
NC_000080.6	102981350	102983148	62	5	2.93148	4.0507	8.54919	100628599(Mir5130),239217(Kctd12)
NC_000080.6	45656807	45658425	62	8	2.34652	4.34318	6.71897	100628600(Mir5131),114874(Ddhd1)
NC_000071.6	123141709	123142931	55	13	1.57376	4.59424	3.79547	100675(AI480526),208043(Setd1b)
NC_000071.6	144767580	144768894	46	7	2.17981	4.08991	4.94875	100683(Trrap)
NC_000071.6	150673259	150674614	55	13	1.57376	4.59424	3.79547	100710(Pds5b),105244808(Gm40353)
NC_000071.6	29568821	29570000	47	7	2.204	4.102	5.17358	100763(Ube3c)
NC_000071.6	36581392	36582303	37	7	1.93559	3.96779	3.85629	100855(Tbc1d14)
NC_000073.6	7298281	7299476	40	5	2.43793	3.80393	5.3142	100885832(Mir5620),12727(Clcn4)
NC_000078.6	83950441	83951728	50	2	3.68869	3.42931	9.1727	101055670(Heatr4),71952(Riox1)
NC_000069.6	147133499	147133975	9	0	3.40171	1.70086	3.61236	101056065(Gm29771)
NC_000072.6	13677293	13678219	43	8	1.9341	4.13698	4.06282	101148(Bmt2)
NC_000072.6	113604610	113605371	24	3	2.4545	3.22725	3.84294	101314(Brk1)
NC_000072.6	29178868	29179858	39	8	1.82459	4.08222	3.64935	101359(Prrt4)
NC_000073.6	133776366	133777068	21	1	3.30762	2.65381	4.87665	101437(Dhx32),66930(Fank1)
NC_000072.6	30173345	30174078	24	3	2.4545	3.22725	3.84294	101447999(Mirc35hg)
NC_000073.6	130865448	130866531	46	9	1.85788	4.25087	4.06789	101476(Plekha1),434249(Gm5602)
NC_000073.6	128611394	128611945	23	4	2.08567	3.36476	3.05312	101490(Inpp5f)
NC_000074.6	95331518	95332157	23	0	4.4076	2.2038	NA	101985(Usb1),79233(Zfp319)
NC_000074.6	124897464	124898515	52	11	1.73289	4.45141	4.1052	102058(Exoc8),244666(Sprtn)
NC_000074.6	3392822	3393429	18	2	2.55422	2.86207	3.498	102098(Arhgef18)
NC_000074.6	124020718	124021544	46	10	1.72038	4.31962	3.68844	102162(Taf5l),382038(Urb2)
NC_000074.6	77549114	77549886	29	6	1.85663	3.73567	3.01816	102182(Prmt9)
NC_000079.6	100650910	100651831	35	7	1.87346	3.93673	3.43645	102216272(Ak6),108143(Taf9),19356(Rad17)
NC_000074.6	23207930	23208645	29	4	2.34205	3.49296	3.9781	102247(Gpat4)
NC_000074.6	11634838	11636468	70	13	1.84644	4.73058	5.33723	102334(Ankrd10),102465714(Mir7238)
NC_000075.6	57764529	57765773	53	5	2.75437	3.96215	7.03007	102414(Clk3)
NC_000075.6	64810868	64812126	49	5	2.66594	3.91793	6.5328	102442(Dennd4a),102640389(Gm36459)
NC_000075.6	119357432	119357932	15	1	2.94173	2.47087	3.91339	102448(Xylb)
NC_000077.6	78178275	78179263	44	11	1.54489	4.35741	3.15925	102465761(Mir7653),68385(Tlcd1)
NC_000077.6	102229511	102230469	34	6	2.03374	3.82423	3.87315	102465892(Mir8101),15184(Hdac5)
NC_000076.6	122678484	122679517	48	10	1.76826	4.34356	3.8843	102466884(Mir8104),102640149(Gm36284),319468(Ppm1h)
NC_000071.6	34573468	34574456	61	9	2.17613	4.40999	5.99013	102466999(Mir7036b),11518(Add1)
NC_000073.6	120917428	120918485	44	6	2.32249	3.9686	5.23041	102467415(n-TLaag4),26939(Polr3e)
NC_000080.6	79480515	79481860	63	11	1.94958	4.55975	5.31705	102467524(n-TEttc4),13709(Elf1),22380(Wbp4)
NC_000074.6	22185400	22186045	16	3	2.01139	3.00569	3.03428	102631575(Gm29878),80986(Ckap2)
NC_000069.6	95818516	95819240	35	5	2.2885	3.72921	4.37016	102631665(Gm29948),75137(Rprd2)
NC_000067.6	131253803	131254209	10	0	3.51122	1.75561	3.61236	102631674(Gm28913)
NC_000069.6	96103997	96105140	41	9	1.72865	4.18625	3.46696	102631798(Gm30044),229603(Otud7b)
NC_000077.6	120990296	120991490	54	11	1.77545	4.47269	4.30187	102631822(Gm30062),104318(Csnk1d)
NC_000078.6	112644555	112645353	31	5	2.15317	3.66155	3.91086	102631879(Gm30101),30954(Siva1)
NC_000078.6	112673426	112674377	38	7	1.96543	3.98272	3.85629	102631949(Gm30150),11651(Akt1)
NC_000068.7	28338926	28339556	15	2	2.35677	2.76335	3.285	102632087(Gm13373)
NC_000067.6	7397936	7398838	28	6	1.81768	3.71619	3.01816	102632124(Gm26901)
NC_000079.6	73846771	73847931	41	9	1.72865	4.18625	3.46696	102632153(Gm30303),72293(Nkd2)
NC_000069.6	84039398	84040598	53	6	2.53198	4.07334	6.41286	102632212(Gm30352),229473(Tmem131l)
NC_000074.6	79398161	79399861	66	16	1.49971	4.83732	3.93693	102632263(Gm30389),17125(Smad1)
NC_000077.6	96345328	96345999	27	4	2.26278	3.45332	3.74275	102632302(Hoxb3os),15410(Hoxb3)
NC_000070.6	106315739	106317047	44	11	1.54489	4.35741	3.15925	102632328(Gm30429),329908(Usp24)
NC_000072.6	91410941	91411683	31	7	1.73813	3.86907	3.02827	102632338(Gm30437),22421(Wnt7a)
NC_000084.6	67774592	67775586	44	6	2.32249	3.9686	5.23041	102632394(Gm26910),72124(Seh1l)
NC_000076.6	79716420	79717586	49	13	1.44355	4.52913	3.08052	102632396(Gm30480),15166(Hcn2)
NC_000083.6	87106829	87108064	63	11	1.94958	4.55975	5.31705	102632435(Gm30510),56468(Socs5)
NC_000078.6	57575705	57576624	31	6	1.93078	3.77274	3.43979	102632448(Gm30518),70846(Ttc6)
NC_000073.6	27333174	27334101	38	7	1.96543	3.98272	3.85629	102632481(Gm30543),108075(Ltbp4)
NC_000069.6	38885223	38886463	50	12	1.57322	4.48705	3.56918	102632538(C230034O21Rik),329628(Fat4)
NC_000073.6	38061148	38061729	22	1	3.3587	2.67935	5.157	102632668(Gm30684),102632789(Gm30771)
NC_000076.6	127288289	127289369	47	9	1.88207	4.26296	4.2732	102632786(Gm20492),110962(Mbd6)
NC_000077.6	96977153	96978056	37	1	3.93559	2.96779	8.0014	102632841(Gm30809),78912(Sp2)
NC_000079.6	13590207	13590918	30	5	2.11669	3.64331	3.6849	102632874(Gm30836),17101(Lyst)
NC_000068.7	131561863	131562840	46	12	1.47937	4.44013	3.02796	102632893(Gm14285),11550(Adra1d)
NC_000076.6	80576397	80578253	117	17	2.06755	5.2037	8.87454	102633244(Gm26710),118445(Klf16)
NC_000081.6	80090896	80091762	27	2	2.99975	3.08484	5.06563	102633270(Gm31134),20972(Syngr1)
NC_000073.6	84151283	84152218	47	1	4.204	3.102	9.73186	102633347(Gm26708),70178(Abhd17c)
NC_000068.7	166905883	166906707	36	5	2.31998	3.74495	4.60319	102633360(Gm31204),110750(Cse1l)
NC_000084.6	40761023	40761611	13	1	2.78831	2.39415	3.64039	102633361(Gm31205)
NC_000076.6	128231623	128232583	42	8	1.90769	4.12377	4.06282	102633407(Gm26847),17339(Mip),21853(Timeless)
NC_000068.7	132144353	132145500	38	7	1.96543	3.98272	3.85629	102633555(Gm14051),54338(Slc23a2)
NC_000078.6	83921013	83922037	49	10	1.79147	4.35517	4.08267	102633601(Gm31386),18222(Numb)
NC_000078.6	84192528	84194511	78	20	1.38415	5.08439	3.98923	102633763(Gm31513),238317(Elmsan1)
NC_000082.6	23987677	23989088	63	11	1.94958	4.55975	5.31705	102633785(Gm31527),12053(Bcl6)
NC_000074.6	126592216	126594414	78	14	1.86958	4.84168	5.95725	102633812(Gm31546),270110(Irf2bp2)
NC_000076.6	39369553	39370893	59	11	1.87542	4.52267	4.90497	102633901(Gm31616),14360(Fyn)
NC_000078.6	3891317	3891826	13	2	2.20335	2.68664	3.03833	102633913(Gm31623),13435(Dnmt3a)
NC_000083.6	74527981	74529271	47	10	1.74457	4.33172	3.8843	102633946(Gm31645),12211(Birc6)
NC_000073.6	13023872	13025178	47	5	2.61904	3.89448	6.28613	102633951(Gm31649),21849(Trim28)
NC_000084.6	70568043	70569111	38	7	1.96543	3.98272	3.85629	102633977(Gm31671),17191(Mbd2)
NC_000078.6	21543300	21543680	13	2	2.20335	2.68664	3.03833	102633983(Gm31676)
NC_000077.6	114593307	114593928	14	1	2.86758	2.43379	3.91339	102634043(Gm31724)
NC_000071.6	64802498	64804524	93	24	1.33236	5.31004	4.23599	102634072(Gm38457),16599(Klf3)
NC_000081.6	8443565	8445129	59	14	1.5535	4.68364	3.83966	102634078(LOC102634078),71175(Nipbl)
NC_000079.6	38527812	38528734	33	7	1.80779	3.9039	3.23081	102634191(Gm31834),105245(Txndc5)
NC_000075.6	70656476	70657491	40	6	2.21554	3.91512	4.76955	102634240(Gm31872),235461(Mindy2)
NC_000076.6	117224105	117224714	28	4	2.3031	3.47348	3.9781	102634363(Gm31963),64050(Yeats4)
NC_000085.6	16077352	16077839	14	2	2.28262	2.72627	3.285	102634445(Gm32026)
NC_000073.6	30588215	30589137	43	5	2.51907	3.8445	5.55481	102634521(Gm32082),75410(Kmt2b)
NC_000078.6	70346991	70347807	25	5	1.9146	3.54226	3.02404	102634611(Gm32151),94090(Trim9)
NC_000084.6	77064838	77065803	35	7	1.87346	3.93673	3.43645	102634716(4930520E11Rik),17344(Pias2)
NC_000076.6	67535124	67536322	43	10	1.6446	4.28173	3.30472	102634748(Gm32255),13654(Egr2)
NC_000083.6	78199750	78200910	50	8	2.10373	4.22179	5.13708	102634780(Gm32282),50766(Crim1)
NC_000068.7	84714485	84715542	44	9	1.80792	4.22589	3.865	102634788(Gm32289),228136(Zdhhc5)
NC_000085.6	37686802	37687515	25	3	2.49956	3.24978	4.08961	102634858(Gm32342),546726(Cyp26c1)
NC_000072.6	124414761	124415456	38	5	2.38047	3.7752	4.83828	102634873(D830015G05Rik),19305(Pex5)
NC_000070.6	47207949	47208746	29	5	2.07902	3.62447	3.46164	102634926(Gm12426),12819(Col15a1)
NC_000070.6	137993310	137994323	41	9	1.72865	4.18625	3.46696	102634927(Gm32394),230861(Eif4g3)
NC_000072.6	124856954	124857942	49	9	1.92898	4.28642	4.4808	102634944(Gm32404),14789(P3h3)
NC_000070.6	47352759	47354042	81	19	1.49737	5.07061	4.44353	102634986(Gm32435),21812(Tgfbr1)
NC_000073.6	94991460	94991882	7	0	3.14533	1.57266	3.0103	102635262(Gm32647)
NC_000067.6	164899017	164899526	16	0	4.01139	2.00569	5.11751	102635269(Gm32652)
NC_000067.6	86434022	86434997	38	8	1.79551	4.06768	3.44661	102635333(Gm32700)
NC_000082.6	13447479	13448602	46	11	1.59485	4.38239	3.34305	102635495(Gm32817)
NC_000070.6	3835299	3835982	31	3	2.73813	3.36907	5.09648	102635504(Gm32823),67427(Rps20)
NC_000077.6	57645130	57645934	28	5	2.04007	3.605	3.46164	102635527(),171212(Galnt10)
NC_000077.6	84869704	84871096	50	9	1.95173	4.29779	4.69059	102635561(Ggnbp2os),217039(Ggnbp2)
NC_000081.6	34837116	34838204	35	8	1.70354	4.02169	3.04994	102635699(Gm32970),16539(Kcns2)
NC_000081.6	74672548	74673244	29	4	2.34205	3.49296	3.9781	102635731(Gm32994),11838(Arc)
NC_000072.6	35133517	35134027	17	2	2.4921	2.83101	3.7876	102635798(Gm33046),53621(Cnot4)
NC_000084.6	49754912	49755960	37	7	1.93559	3.96779	3.85629	102635853(Gm16283),68857(Dtwd2)
NC_000083.6	80060941	80062387	63	14	1.62765	4.72071	4.20641	102635879(4933407O12Rik),72692(Hnrnpll)
NC_000070.6	111719866	111720513	31	6	1.93078	3.77274	3.43979	102635996(Gm33192),67946(Spata6)
NC_000079.6	43864307	43864954	15	0	3.94173	1.97087	4.81648	102636000(Gm33195)
NC_000075.6	53667099	53667881	28	6	1.81768	3.71619	3.01816	102636154(Gm16124),75717(Cul5)
NC_000076.6	42277482	42278516	35	8	1.70354	4.02169	3.04994	102636198(Gm33333)
NC_000070.6	155734355	155735564	39	9	1.67259	4.15822	3.2721	102636313(1500002C15Rik),381582(Tmem240)
NC_000067.6	36721703	36722349	15	2	2.35677	2.76335	3.285	102636476(Gm33533),71166(4933424G06Rik)
NC_000083.6	25432658	25434730	78	18	1.52854	5.0122	4.5685	102636523(Gm33565),58226(Cacna1h)
NC_000074.6	12756680	12757856	42	10	1.61818	4.26852	3.30472	102636552(Gm33587),50770(Atp11a)
NC_000069.6	88620820	88621652	34	7	1.8411	3.92055	3.43645	102636610(Gm20652),16800(Arhgef2)
NC_000081.6	97830749	97831962	58	12	1.74064	4.57076	4.32705	102636625(Gm33636),56233(Hdac7)
NC_000067.6	167284240	167285364	47	11	1.61904	4.39448	3.52967	102636733(Gm2453),80914(Uck2)
NC_000073.6	130519403	130520313	24	4	2.13257	3.38821	3.28004	102636907(Gm4275),11907(Ate1)
NC_000072.6	86996803	86997149	8	0	3.28066	1.64033	3.31133	102637099(Gm38495),269774(Aak1)
NC_000078.6	108792173	108794865	145	29	1.57523	5.69451	7.24575	102637400(Gm34220),22632(Yy1)
NC_000083.6	82816832	82817366	11	1	2.61119	2.3056	3.10048	102637462(Gm34265)
NC_000070.6	133813294	133814640	56	14	1.49456	4.65417	3.48244	102637505(Gm34296)
NC_000081.6	85580161	85582191	67	9	2.28227	4.46306	6.88974	102637632(Gm34394),105975(AU022754),22422(Wnt7b)
NC_000070.6	117288903	117289652	30	3	2.70166	3.35083	4.84203	102637763(Gm12843),66743(Rnf220)
NC_000083.6	4907909	4908730	36	0	4.90494	2.45247	NA	102637782(Gm34507)
NC_000081.6	36938411	36939137	19	1	3.19812	2.59906	4.74185	102637894(Gm34590)
NC_000077.6	102989903	102990572	20	2	2.66921	2.91957	3.75443	102637931(Gm34620)
NC_000068.7	34825739	34826432	18	2	2.55422	2.86207	3.498	102637973(Gm34653),30050(Fbxw2)
NC_000081.6	86032970	86034475	56	5	2.81649	3.99321	7.53216	102638127(Gm34764),12614(Celsr1)
NC_000070.6	57299702	57300616	37	5	2.35062	3.76027	4.83828	102638251(Gm12536),545622(Ptpn3)
NC_000073.6	100227147	100227911	26	4	2.221	3.43243	3.51	102638275(Gm34877),70974(Pgm2l1)
NC_000068.7	147083787	147085622	76	19	1.42508	5.03447	4.09923	102638289(Gm34889),228731(Nkx2-4)
NC_000083.6	44105381	44106159	25	5	1.9146	3.54226	3.02404	102638326(Gm34917),224794(Enpp4)
NC_000080.6	60784303	60785048	27	4	2.26278	3.45332	3.74275	102638504(Mipepos),70478(Mipep)
NC_000068.7	160872102	160873434	65	15	1.56989	4.78495	4.24841	102638603(Gm35129),320799(Zhx3)
NC_000078.6	52503527	52504955	62	15	1.51644	4.75822	3.88697	102638685(Gm35188),11855(Arhgap5)
NC_000081.6	38298805	38300226	63	8	2.36461	4.35223	6.71897	102638762(Gm35248),21847(Klf10)
NC_000081.6	38300563	38301449	39	6	2.18716	3.90094	4.5421	102638762(Gm35248),21847(Klf10)
NC_000075.6	62343314	62344176	41	9	1.72865	4.18625	3.46696	102638888(LOC102638888),11737(Anp32a)
NC_000070.6	57955996	57956711	17	2	2.4921	2.83101	3.7876	102638892(Gm35344),22166(Txn1)
NC_000067.6	63272931	63274045	46	12	1.47937	4.44013	3.02796	102639043(Gm11608),73884(Zdbf2)
NC_000075.6	62979793	62981170	82	13	2.02587	4.82029	6.7824	102639214(Gm35574),56469(Pias1)
NC_000071.6	28316695	28317684	34	8	1.67117	4.00551	3.04994	102639248(Gm35602),381626(Rbm33)
NC_000076.6	76961376	76962281	29	6	1.85663	3.73567	3.01816	102639326(Gm35664),59093(Pcbp3)
NC_000074.6	36248004	36249566	76	19	1.42508	5.03447	4.09923	102639386(Gm35712),244421(Lonrf1)
NC_000077.6	119022735	119023682	35	6	2.06611	3.84041	3.87315	102639538(Gm35829),12416(Cbx2)
NC_000074.6	72492078	72493074	38	6	2.15808	3.88639	4.3168	102639683(LOC102639683),270066(Slc35e1)
NC_000078.6	24251957	24252820	30	5	2.11669	3.64331	3.6849	102639700(LOC102639700)
NC_000077.6	106020181	106020947	16	3	2.01139	3.00569	3.03428	102639728(Gm35971),192775(Kcnh6)
NC_000075.6	21149654	21150254	18	1	3.13918	2.56959	4.74185	102639735(Gm35977),12539(Cdc37)
NC_000068.7	26503373	26504080	23	2	2.82263	2.99628	4.27364	102639736(Gm35978),18128(Notch1)
NC_000075.6	21165322	21166652	47	8	2.03408	4.18696	4.701	102639919(Gm36118),18577(Pde4a)
NC_000073.6	5051426	5051964	22	2	2.77374	2.97183	4.27364	102640192(Gm15510),68992(Zfp580)
NC_000081.6	102470372	102471445	55	14	1.47422	4.644	3.48244	102640208(Gm36331),18521(Pcbp2)
NC_000081.6	78119415	78120206	31	7	1.73813	3.86907	3.02827	102640344(A730060N03Rik),12300(Cacng2)
NC_000085.6	8756596	8757614	45	10	1.69567	4.30727	3.68844	102640359(1700023D09Rik),53319(Nxf1)
NC_000071.6	148928522	148929228	25	5	1.9146	3.54226	3.02404	102640373(Gm36446),231912(Katnal1)
NC_000073.6	120842513	120843421	32	4	2.45156	3.54771	4.45581	102640377(Gm36449),13631(Eef2k)
NC_000077.6	119942315	119943824	73	15	1.70135	4.85067	4.99657	102640451(Gm11767),108100(Baiap2)
NC_000069.6	146685248	146685758	11	1	2.61119	2.3056	3.10048	102640466(Gm36521),75015(4930503B20Rik)
NC_000073.6	82865936	82866765	31	0	4.73813	2.36907	NA	102640547(Gm36584)
NC_000073.6	82866898	82868038	51	13	1.48861	4.55166	3.2552	102640547(Gm36584),108797(Mex3b)
NC_000069.6	131105778	131107029	39	6	2.18716	3.90094	4.5421	102640569(Gm36603)
NC_000085.6	8920235	8920888	24	4	2.13257	3.38821	3.28004	102640604(Gm36629),72727(B3gat3)
NC_000069.6	131489763	131490854	35	8	1.70354	4.02169	3.04994	102640761(Gm36753),74442(Sgms2)
NC_000073.6	24953899	24954807	56	13	1.5941	4.6044	3.79547	102640835(Gm36809)
NC_000077.6	108846975	108847564	12	1	2.70316	2.35158	3.36932	102640849(Gm36818),76380(Cep112)
NC_000083.6	17849986	17850574	15	2	2.35677	2.76335	3.285	102640970(Gm36907),15116(Has1)
NC_000069.6	119782379	119783852	67	12	1.90375	4.65232	5.52852	102641335(Gm38548),56195(Ptbp2)
NC_000079.6	78162979	78164289	41	10	1.59115	4.255	3.11714	102642321(Gm38604),68675(Fam172a)
NC_000076.6	85102193	85103426	52	10	1.85842	4.38864	4.48643	103266(Tmem263),14202(Fhl4)
NC_000076.6	81232845	81233732	48	12	1.52725	4.46407	3.20553	103406(Zfr2)
NC_000077.6	93884865	93886645	65	17	1.39997	4.86991	3.64582	103537(Mbtd1),217109(Utp18)
NC_000077.6	97628118	97629844	76	22	1.22345	5.13529	3.32004	103551(Epop)
NC_000077.6	32642448	32643538	43	9	1.7821	4.21298	3.66464	103583(Fbxw11)
NC_000077.6	4186581	4187200	33	1	3.80779	2.9039	7.14178	103724(Tbc1d10a)
NC_000077.6	22512290	22512975	25	5	1.9146	3.54226	3.02404	103765(Tmem17)
NC_000083.6	57030791	57031843	56	10	1.94202	4.43044	4.89889	103775(Slc25a41),16549(Khsrp)
NC_000077.6	58306949	58308176	33	4	2.48586	3.56486	4.69786	103836(Zfp692)
NC_000072.6	88084359	88084886	13	0	3.78831	1.89415	4.51545	103963(Rpn1)
NC_000084.6	60595998	60596584	31	6	1.93078	3.77274	3.43979	104027(Synpo)
NC_000075.6	118606453	118607340	35	6	2.06611	3.84041	3.87315	104099(Itga9)
NC_000073.6	126272080	126273101	41	6	2.24322	3.92897	4.76955	104175(Sbk1)
NC_000083.6	86962730	86963859	40	7	2.02289	4.01145	4.28648	104215(Rhoq)
NC_000072.6	71632191	71633052	25	3	2.49956	3.24978	4.08961	104263(Kdm3a)
NC_000074.6	105297459	105298231	35	3	2.87346	3.43673	5.6101	104394(E2f4)
NC_000085.6	5688171	5688528	9	0	3.40171	1.70086	3.61236	104401(Pcnx3)
NC_000077.6	5541685	5542199	18	0	4.13918	2.06959	5.71957	104479(Ccdc117)
NC_000077.6	109472954	109473929	48	9	1.90576	4.27481	4.2732	104681(Slc16a6),74008(Arsg)
NC_000078.6	110889120	110889762	28	3	2.62503	3.31252	4.58931	104859(Tecpr2),67236(Cinp)
NC_000078.6	99884269	99884895	25	4	2.17764	3.41075	3.51	104884(Tdp1),105245047(Gm40556),78767(Efcab11)
NC_000078.6	10390671	10391196	17	0	4.07706	2.03853	5.41854	105014(Rdh14)
NC_000079.6	115089821	115090411	16	3	2.01139	3.00569	3.03428	105083(Pelo),109700(Itga1)
NC_000079.6	80885632	80886405	34	4	2.51917	3.58151	4.94184	105171(Arrdc3)
NC_000079.6	3610467	3611244	22	4	2.03677	3.34031	3.05312	105203(Fam208b)
NC_000071.6	143234963	143235570	17	1	3.07706	2.53853	4.4643	105242556(Gm38735),231866(Zfp12)
NC_000071.6	143731375	143732785	52	13	1.5105	4.5626	3.43266	105242559(Gm38737),76800(Usp42)
NC_000072.6	50109921	50110865	40	6	2.21554	3.91512	4.76955	105242649(Gm38805),56524(Mpp6)
NC_000072.6	85373926	85374994	40	10	1.56346	4.24116	3.11714	105242701(),52055(Rab11fip5)
NC_000073.6	19714749	19715716	31	6	1.93078	3.77274	3.43979	105242864(Gm38955),53333(Tomm40)
NC_000077.6	98457653	98458335	33	5	2.22283	3.69638	4.13933	105242890(Gm38975)
NC_000073.6	126502722	126503897	51	10	1.83654	4.3777	4.28341	105243053(4930456A14Rik),233871(Atxn2l)
NC_000074.6	122376093	122377166	57	9	2.09951	4.37168	5.54974	105243312(Gm39270),76014(Zc3h18)
NC_000075.6	44066843	44067421	13	2	2.20335	2.68664	3.03833	105243390(Gm39325),53376(Usp2)
NC_000081.6	84987291	84988206	42	8	1.90769	4.12377	4.06282	105243769(Gm39558),223739(5031439G07Rik)
NC_000067.6	80339906	80340977	43	9	1.7821	4.21298	3.66464	105243961(Gm39667),26554(Cul3)
NC_000067.6	82724623	82725194	16	0	4.01139	2.00569	5.11751	105243964(C430014B12Rik),75734(Mff)
NC_000068.7	4493638	4494078	11	1	2.61119	2.3056	3.10048	105244073(Gm39751),209630(Frmd4a)
NC_000068.7	18064139	18065665	70	12	1.95336	4.67712	5.73528	105244088(Gm39762),17354(Mllt10)
NC_000068.7	32846951	32847560	25	5	1.9146	3.54226	3.02404	105244117(Gm13524),20910(Stxbp1)
NC_000068.7	57123461	57124395	47	8	2.03408	4.18696	4.701	105244150(LOC105244150),18227(Nr4a2)
NC_000068.7	75658752	75660044	59	9	2.13846	4.39116	5.7691	105244210(Gm39859),229279(Hnrnpa3)
NC_000068.7	76675024	76675918	40	9	1.70096	4.17241	3.46696	105244212(Gm39860),83435(Plekha3)
NC_000068.7	91069856	91070592	33	2	3.22283	3.19638	6.14078	105244227(Gm39874),68427(Slc39a13)
NC_000068.7	122368529	122369363	71	11	2.08491	4.62742	6.378	105244278(Gm39918),435684(Shf)
NC_000068.7	128125743	128126146	13	2	2.20335	2.68664	3.03833	105244287(Gm39926),12125(Bcl2l11),74121(Acoxl)
NC_000068.7	153291181	153291695	12	0	3.70316	1.85158	4.21442	105244330(Gm39961),16569(Kif3b)
NC_000068.7	168080603	168081762	60	9	2.15745	4.40065	5.99013	105244367(Gm39990),58220(Pard6b)
NC_000068.7	164879140	164880039	39	0	4.99452	2.49726	NA	105244413(4930445K14Rik),228866(Pcif1)
NC_000069.6	41563179	41564088	31	7	1.73813	3.86907	3.02827	105244433(LOC105244433),269424(Jade1)
NC_000077.6	76398485	76399532	40	7	2.02289	4.01145	4.28648	105244613(Gm40199),18230(Nxn)
NC_000070.6	108217117	108218417	51	10	1.83654	4.3777	4.28341	105244647(Gm40222),230590(Zyg11a)
NC_000070.6	109280062	109281065	45	9	1.83317	4.23851	4.06789	105244653(Gm40225),13858(Eps15)
NC_000071.6	5670585	5670868	7	0	3.14533	1.57266	3.0103	105244703(Gm40262),74051(Steap2)
NC_000072.6	89361467	89362995	64	18	1.30443	4.90014	3.21212	105244887(Gm40415),18844(Plxna1)
NC_000076.6	14323870	14324223	10	0	3.51122	1.75561	3.61236	105245109(Gm40603)
NC_000076.6	94514527	94515291	32	6	1.96614	3.79042	3.43979	105245265(Gm40743),319880(Tmcc3)
NC_000076.6	108331769	108333433	69	17	1.46758	4.90371	3.98916	105245278(Gm40755),114774(Pawr)
NC_000078.6	4592881	4593778	34	8	1.67117	4.00551	3.04994	105245369(Gm40835),20403(Itsn2)
NC_000078.6	18609791	18610620	32	7	1.77349	3.88675	3.02827	105245383(Gm40848)
NC_000078.6	99644832	99645510	24	4	2.13257	3.38821	3.28004	105245440(LOC105245440)
NC_000079.6	60601610	60602338	39	9	1.67259	4.15822	3.2721	105245529(Gm40974),69635(Dapk1)
NC_000079.6	69534233	69535328	69	6	2.83015	4.22243	8.87759	105245580(A930018O16Rik),210106(Tent4a)
NC_000080.6	61037617	61038235	16	3	2.01139	3.00569	3.03428	105245771(Gm41167),29820(Tnfrsf19)
NC_000080.6	62331971	62332470	12	0	3.70316	1.85158	4.21442	105245777(Gm41173),67153(Rnaseh2b)
NC_000080.6	120538837	120539449	15	2	2.35677	2.76335	3.285	105245863(Gm41251)
NC_000081.6	34082493	34083606	32	5	2.18853	3.67923	3.91086	105245911(Gm41291),67154(Mtdh)
NC_000081.6	80013641	80014358	31	7	1.73813	3.86907	3.02827	105245994(Gm41361),18591(Pdgfb)
NC_000081.6	98934202	98934749	15	2	2.35677	2.76335	3.285	105246035(Gm41396),22143(Tuba1b)
NC_000079.6	98316143	98317117	37	4	2.61366	3.62876	5.43515	105246056(Gm9828),218490(Btf3)
NC_000082.6	35022219	35023077	31	6	1.93078	3.77274	3.43979	105246106(LOC105246106),70757(Hacd2)
NC_000084.6	6241135	6241616	11	1	2.61119	2.3056	3.10048	105246365(Gm41664),16573(Kif5b)
NC_000084.6	53463581	53465347	71	19	1.34794	4.9959	3.59866	105246436(Gm41726),225518(Prdm6)
NC_000084.6	74778510	74779147	28	5	2.04007	3.605	3.46164	105246489(Gm41774)
NC_000085.6	6979945	6980699	38	5	2.38047	3.7752	4.83828	105246528(Gm41803),14227(Fkbp2)
NC_000085.6	60580212	60581114	28	6	1.81768	3.71619	3.01816	105246616(Gm41883),78832(Cacul1)
NC_000067.6	128244124	128244645	18	1	3.13918	2.56959	4.74185	105246702(Gm41949),67812(Ubxn4)
NC_000074.6	83608031	83608526	13	1	2.78831	2.39415	3.64039	105246805(Gm42029),81489(Dnajb1)
NC_000085.6	4711883	4712489	23	2	2.82263	2.99628	4.27364	105246839(Gm42061),20743(Sptbn2)
NC_000077.6	86757814	86758276	15	2	2.35677	2.76335	3.285	105246880(Gm42085)
NC_000071.6	88564578	88565915	59	13	1.65303	4.63387	4.16805	105246910(Gm42107),52822(Rufy3)
NC_000071.6	92434462	92435278	34	6	2.03374	3.82423	3.87315	105246918(Gm42114),269113(Nup54)
NC_000071.6	108693818	108695343	65	12	1.86945	4.63517	5.32351	105246959(Gm42151),116701(Fgfrl1)
NC_000071.6	105699509	105700859	63	12	1.8341	4.61749	4.91898	105246978(Gm42166),231549(Lrrc8d)
NC_000071.6	21055210	21056479	58	13	1.63372	4.62422	3.98059	105247043(Gm42221),19248(Ptpn12)
NC_000070.6	55349447	55350970	69	16	1.55004	4.86248	4.29353	105247136(Gm42290),19359(Rad23b)
NC_000070.6	133518783	133519669	31	5	2.15317	3.66155	3.91086	105247180(Gm42323),69073(Kdf1)
NC_000070.6	141444435	141445429	49	13	1.44355	4.52913	3.08052	105247198(Gm42337),22642(Zbtb17)
NC_000080.6	55681228	55681814	16	0	4.01139	2.00569	5.11751	105446(Gmpr2),28113(Tinf2)
NC_000080.6	49065908	49066806	45	7	2.1551	4.07755	4.94875	105504(Exoc5),74385(Ap5m1)
NC_000080.6	69731866	69732569	16	2	2.42642	2.79817	3.53488	105513(Chmp7)
NC_000080.6	31829733	31830993	67	16	1.51673	4.84583	4.11414	105522(Ankrd28)
NC_000080.6	120410528	120411143	15	2	2.35677	2.76335	3.285	105559(Mbnl2)
NC_000080.6	25693914	25694490	17	2	2.4921	2.83101	3.7876	105675(Ppif)
NC_000081.6	75909419	75910390	31	5	2.15317	3.66155	3.91086	105734(Tigd5),66656(Eef1d)
NC_000074.6	120667306	120668729	71	14	1.76298	4.78838	5.16048	105734727(Gm27021),12857(Cox4i1),18117(Emc8)
NC_000081.6	76068810	76069907	46	7	2.17981	4.08991	4.94875	105782(Scrib)
NC_000081.6	5143337	5144581	53	5	2.75437	3.96215	7.03007	105787(Prkaa1)
NC_000081.6	97246870	97247952	49	13	1.44355	4.52913	3.08052	105827(Amigo2),239647(Pced1b)
NC_000083.6	29614590	29615536	39	6	2.18716	3.90094	4.5421	106014251(Gm28043),58230(Rnf8)
NC_000081.6	78877172	78877975	45	8	1.98518	4.16251	4.48604	106039(Gga1)
NC_000081.6	93595118	93596333	55	14	1.47422	4.644	3.48244	106042(Prickle1)
NC_000081.6	73645038	73646040	47	9	1.88207	4.26296	4.2732	106068(Slc45a4)
NC_000082.6	64851007	64852837	65	19	1.24797	4.94591	3.11893	106143(Cggbp1),72020(Zfp654)
NC_000082.6	11134202	11135042	32	6	1.96614	3.79042	3.43979	106200(Txndc11)
NC_000082.6	31948173	31948847	20	3	2.25417	3.12709	3.11807	106264(0610012G03Rik),68092(Ncbp2)
NC_000082.6	13780633	13781119	16	2	2.42642	2.79817	3.53488	106298(Rrn3)
NC_000083.6	83214564	83216245	105	14	2.20737	5.01057	8.92942	106522(Pkdcc),108168353(LOC108168353)
NC_000070.6	88938061	88938935	28	6	1.81768	3.71619	3.01816	106557447(LOC106557447)
NC_000083.6	3114221	3115776	89	8	2.75633	4.54809	10.3214	106583(Scaf8),108168313(LOC108168313)
NC_000083.6	25844121	25844806	18	1	3.13918	2.56959	4.74185	106618(Wdr90),214952(Rhot2)
NC_000083.6	57249228	57249656	12	1	2.70316	2.35158	3.36932	106628(Trip10)
NC_000083.6	25015451	25016214	22	2	2.77374	2.97183	4.27364	106633(Ift140),57354(Cramp1l)
NC_000083.6	56716470	56717028	23	1	3.4076	2.7038	5.157	106639(Vmac)
NC_000084.6	15062824	15064360	70	20	1.26148	5.02306	3.18537	106931(Kctd1)
NC_000084.6	67640919	67641722	38	5	2.38047	3.7752	4.83828	107047(Psmg2),225659(Cep76)
NC_000085.6	7165024	7166300	71	11	2.08491	4.62742	6.378	107227(Macrod1),396184(Flrt1)
NC_000085.6	10688608	10689386	42	4	2.75569	3.69977	6.18692	107305(Vps37c)
NC_000077.6	84179247	84180394	52	9	1.99593	4.31989	4.90247	107476(Acaca)
NC_000068.7	109917602	109918523	45	11	1.57014	4.37003	3.34305	107515(Lgr4)
NC_000074.6	94666472	94667016	15	1	2.94173	2.47087	3.91339	107566(Arl2bp)
NC_000070.6	19708609	19709302	34	6	2.03374	3.82423	3.87315	107568(Wwp1)
NC_000082.6	34744963	34745462	15	1	2.94173	2.47087	3.91339	107589(Mylk)
NC_000068.7	29619415	29620233	26	4	2.221	3.43243	3.51	107746(Rapgef1)
NC_000079.6	94284655	94285668	44	5	2.54489	3.85741	5.79706	107767(Scamp1)
NC_000071.6	33820144	33821626	82	21	1.37379	5.14633	4.04946	107823(Nsd2)
NC_000085.6	5272459	5273634	47	8	2.03408	4.18696	4.701	107975(Pacs1)
NC_000071.6	110107795	110108547	26	5	1.95796	3.56394	3.02404	107999(Gtpbp6)
NC_000086.7	163908986	163909589	17	1	3.07706	2.53853	4.4643	108012(Ap1s2)
NC_000084.6	25486723	25487548	33	7	1.80779	3.9039	3.23081	108013(Celf4)
NC_000084.6	25725274	25725641	7	0	3.14533	1.57266	3.0103	108013(Celf4)
NC_000069.6	126596626	126597689	42	4	2.75569	3.69977	6.18692	108058(Camk2d)
NC_000073.6	87584157	87584733	14	2	2.28262	2.72627	3.285	108071(Grm5)
NC_000071.6	143112231	143113213	37	9	1.61366	4.12876	3.08023	108086(Rnf216)
NC_000069.6	97658015	97658836	36	7	1.90494	3.95247	3.645	108097(Prkab2)
NC_000073.6	74553883	74555306	66	17	1.41725	4.87855	3.64582	108116(Slco3a1)
NC_000083.6	31658174	31659146	31	3	2.73813	3.36907	5.09648	108121(U2af1)
NC_000077.6	5098416	5099237	23	3	2.4076	3.2038	3.59865	108167339(LOC108167339),14030(Ewsr1),279766(Rhbdd3)
NC_000073.6	45015705	45016497	33	4	2.48586	3.56486	4.69786	108167421(Gm45982),233208(Scaf1)
NC_000073.6	139388804	139389658	31	6	1.93078	3.77274	3.43979	108167465(Gm46004),212111(Inpp5a)
NC_000073.6	98702921	98703770	33	5	2.22283	3.69638	4.13933	108167485(LOC108167485),72981(Thap12)
NC_000074.6	11757846	11758773	46	12	1.47937	4.44013	3.02796	108167521(Gm46031),54126(Arhgef7)
NC_000074.6	13757392	13758249	27	5	1.99975	3.58484	3.24128	108167523(Gm46032),69957(Cdc16)
NC_000074.6	22858668	22860382	88	16	1.82595	5.00044	6.19247	108167527(Gm46036),244349(Kat6a)
NC_000074.6	105636161	105637747	64	11	1.96739	4.56866	5.52586	108167549(),13018(Ctcf),546100(Gm5914)
NC_000074.6	126076272	126076803	14	2	2.28262	2.72627	3.285	108167586(Gm46072)
NC_000067.6	55405606	55406870	46	9	1.85788	4.25087	4.06789	108167625(Gm46092),227120(Plcl1)
NC_000067.6	82839151	82840536	78	13	1.96912	4.79191	6.36168	108167631(Gm46096),15463(Agfg1)
NC_000075.6	96905264	96905833	16	3	2.01139	3.00569	3.03428	108167676(Gm8524)
NC_000075.6	100545466	100546471	39	9	1.67259	4.15822	3.2721	108167700(Gm46139),17973(Nck1)
NC_000076.6	9900560	9901354	27	4	2.26278	3.45332	3.74275	108167793(Gm46210),78808(Stxbp5)
NC_000076.6	61475400	61476146	20	2	2.66921	2.91957	3.75443	108167814(LOC108167814),216011(Lrrc20)
NC_000076.6	95514451	95515892	70	15	1.6538	4.8269	4.61848	108167829(Gm46239),93765(Ube2n)
NC_000077.6	3142475	3142786	14	2	2.28262	2.72627	3.285	108167875(Gm11399),78887(Sfi1)
NC_000077.6	6291455	6292363	30	4	2.37973	3.51179	4.21584	108167883(Gm46270),18293(Ogdh)
NC_000077.6	98937369	98938428	39	7	1.99452	3.99726	4.07017	108167925(Gm46294),19401(Rara)
NC_000078.6	3309381	3310433	37	8	1.76566	4.05276	3.44661	108167952(LOC108167952),19325(Rab10)
NC_000078.6	84218339	84219266	36	8	1.73502	4.03743	3.24675	108167961(Gm46319),238317(Elmsan1)
NC_000078.6	113000022	113001104	52	10	1.85842	4.38864	4.48643	108168035(LOC108168035),72308(Brf1)
NC_000079.6	119790130	119791691	82	13	2.02587	4.82029	6.7824	108168049(Gm46390),72465(Zfp131)
NC_000079.6	55536179	55536593	14	2	2.28262	2.72627	3.285	108168085(Gm46416),72935(Ddx41)
NC_000080.6	62509952	62510417	14	2	2.28262	2.72627	3.285	108168198(Gm46482)
NC_000081.6	98092944	98093466	15	2	2.35677	2.76335	3.285	108168225(Gm26513),18642(Pfkm),223870(Senp1)
NC_000081.6	13158661	13159239	13	2	2.20335	2.68664	3.03833	108168237(Gm46513),12563(Cdh6)
NC_000082.6	31080766	31081688	35	3	2.87346	3.43673	5.6101	108168292(Gm46554),268880(Xxylt1)
NC_000086.7	12086949	12087818	29	2	3.07902	3.12447	5.33258	108168482(Gm46687),71458(Bcor)
NC_000086.7	12080000	12080834	32	6	1.96614	3.79042	3.43979	108168482(Gm46687),71458(Bcor)
NC_000068.7	163418842	163419764	31	3	2.73813	3.36907	5.09648	108168734(2900093K20Rik),66680(Oser1)
NC_000068.7	166713277	166714211	24	2	2.86954	3.01973	4.53604	108168817(Gm46777),277360(Prex1)
NC_000069.6	40949342	40950699	67	16	1.51673	4.84583	4.11414	108168867(Gm46802),214048(Larp1b)
NC_000069.6	51416172	51416832	40	7	2.02289	4.01145	4.28648	108168868(LOC108168868),74838(Naa15)
NC_000069.6	122245199	122246153	37	6	2.12823	3.87147	4.3168	108168894(Gm46822),14630(Gclm)
NC_000069.6	137864060	137865466	54	15	1.36041	4.68021	3.02569	108168904(Gm43403),51788(H2afz)
NC_000070.6	24897926	24898450	12	1	2.70316	2.35158	3.36932	108168934(Gm46848),68493(Ndufaf4)
NC_000070.6	57142772	57143906	44	9	1.80792	4.22589	3.865	108168956(LOC108168956),54357(Epb41l4b)
NC_000070.6	137356752	137357817	52	11	1.73289	4.45141	4.1052	108168959(LOC108168959),12540(Cdc42)
NC_000070.6	139075228	139075805	25	3	2.49956	3.24978	4.08961	108168960(Gm45533),15565(Htr6)
NC_000070.6	103214350	103215459	63	14	1.62765	4.72071	4.20641	108168969(Gm46864),242585(Slc35d1)
NC_000070.6	107434226	107435359	49	11	1.66594	4.41793	3.71899	108168971(Gm46866),230587(Glis1)
NC_000070.6	117882761	117883694	39	9	1.67259	4.15822	3.2721	108168974(Gm12841),53418(B4galt2)
NC_000070.6	156196592	156198275	83	19	1.52505	5.08446	4.7957	108168990(Gm46878),11603(Agrn)
NC_000071.6	9160910	9162133	59	6	2.65303	4.13387	7.38485	108169023(Gm46901),23857(Dmtf1)
NC_000071.6	41761820	41762343	20	3	2.25417	3.12709	3.11807	108169041(Gm46910),12020(Nkx3-2)
NC_000071.6	123973305	123974357	50	11	1.68869	4.42931	3.91087	108169068(Gm46922),29816(Hip1r)
NC_000071.6	124112046	124112521	9	0	3.40171	1.70086	3.61236	108169069(Gm16001),66627(Ogfod2)
NC_000072.6	113076193	113076955	27	4	2.26278	3.45332	3.74275	108169182(Gm46982),14910(Gt(ROSA)26Sor)
NC_000072.6	113076995	113078018	42	2	3.49265	3.33129	7.78356	108169182(Gm46982),14910(Gt(ROSA)26Sor),72895(Setd5)
NC_000072.6	38875534	38876689	56	12	1.70101	4.55095	4.13403	108169201(Gm46988),15258(Hipk2),21391(Tbxas1)
NC_000077.6	40692263	40693003	21	3	2.30762	3.15381	3.35694	108645(Mat2b)
NC_000079.6	38960056	38960769	20	3	2.25417	3.12709	3.11807	108652(Slc35b3),75958(5033403F01Rik)
NC_000072.6	122485773	122487047	51	12	1.59553	4.4982	3.56918	108653(Rimklb)
NC_000072.6	99522193	99523184	47	8	2.03408	4.18696	4.701	108655(Foxp1)
NC_000077.6	58938088	58939260	37	9	1.61366	4.12876	3.08023	108660(Rnf187)
NC_000077.6	29373182	29374115	46	4	2.85788	3.75087	6.69496	108686(Ccdc88a)
NC_000076.6	77515215	77515980	26	5	1.95796	3.56394	3.02404	108707(Fam207a)
NC_000067.6	165194132	165194731	26	1	3.54293	2.77146	5.72042	108735(Sft2d2)
NC_000070.6	33247259	33248753	72	10	2.22628	4.57257	6.84482	108767(Pnrc1)
NC_000080.6	77036089	77037099	52	10	1.85842	4.38864	4.48643	108811(Ccdc122),210808(Lacc1)
NC_000076.6	67096260	67097509	51	6	2.48861	4.05166	6.17324	108829(Jmjd1c),28193(Reep3)
NC_000075.6	85748735	85749503	25	4	2.17764	3.41075	3.51	108837(Ibtk)
NC_000076.6	5823328	5824054	21	0	4.30762	2.15381	NA	108853(Mtrf1l)
NC_000077.6	121451847	121452294	16	3	2.01139	3.00569	3.03428	108903(Tbcd)
NC_000070.6	140701202	140703264	110	22	1.64365	5.34539	6.38507	108911(Rcc2)
NC_000079.6	41249630	41250586	33	6	2.00044	3.80757	3.6551	108934(Smim13)
NC_000069.6	138143661	138144053	12	0	3.70316	1.85158	4.21442	108943(Trmt10a)
NC_000069.6	152395327	152396515	62	4	3.19452	3.91919	9.29913	108946(Zzz3)
NC_000069.6	152442315	152442890	14	2	2.28262	2.72627	3.285	108946(Zzz3)
NC_000074.6	94837880	94838649	28	5	2.04007	3.605	3.46164	109006(Ciapin1),67914(Coq9)
NC_000068.7	4881171	4882703	68	17	1.45104	4.89545	3.81635	109079(Sephs1)
NC_000075.6	106885908	106887494	69	19	1.31557	4.97971	3.43633	109095(Rbm15b),74840(Manf)
NC_000071.6	67306785	67307382	24	3	2.4545	3.22725	3.84294	109108(Slc30a9)
NC_000085.6	30030026	30031481	59	12	1.75995	4.58041	4.52227	109113(Uhrf2)
NC_000074.6	79294460	79295242	33	3	2.80779	3.4039	5.35254	109136(Mmaa),234479(Gm4890)
NC_000071.6	115157658	115158513	44	11	1.54489	4.35741	3.15925	109154(Mlec)
NC_000075.6	55148910	55150268	54	15	1.36041	4.68021	3.02569	109161(Ube2q2)
NC_000076.6	43046553	43046993	13	2	2.20335	2.68664	3.03833	109205(Sobp)
NC_000068.7	48949008	48949604	13	1	2.78831	2.39415	3.64039	109241(Mbd5),26428(Orc4)
NC_000068.7	158625051	158625558	16	2	2.42642	2.79817	3.53488	109275(Actr5)
NC_000068.7	26139782	26140839	57	5	2.83647	4.0032	7.78488	109299(Tmem250-ps)
NC_000069.6	142881135	142882633	95	16	1.91294	5.04393	6.99767	109333(Pkn2),320229(9530052C20Rik)
NC_000077.6	61683997	61685102	31	7	1.73813	3.86907	3.02827	109342(Slc5a10),69640(Fam83g)
NC_000079.6	38151031	38152063	37	9	1.61366	4.12876	3.08023	109620(Dsp)
NC_000075.6	86571646	86572375	17	2	2.4921	2.83101	3.7876	109785(Pgm3),69519(Rwdd2a)
NC_000073.6	66079516	66080068	16	3	2.01139	3.00569	3.03428	109815(Selenos)
NC_000072.6	39724915	39725810	37	2	3.35062	3.26027	6.95833	109880(Braf)
NC_000069.6	105800779	105801678	33	7	1.80779	3.9039	3.23081	109905(Rap1a)
NC_000085.6	12794970	12796105	53	7	2.33933	4.16967	5.85893	109910(Zfp91),664779(Gm44505)
NC_000078.6	76369030	76371299	120	26	1.51144	5.51061	6.03398	109929(Zbtb25),268564(Zbtb1)
NC_000077.6	76468327	76468737	12	1	2.70316	2.35158	3.36932	109934(Abr)
NC_000079.6	47105435	47106575	72	13	1.87836	4.74654	5.53877	110052(Dek)
NC_000068.7	125247010	125248182	35	7	1.87346	3.93673	3.43645	110074(Dut)
NC_000081.6	78982705	78983379	25	5	1.9146	3.54226	3.02404	110253(Triobp)
NC_000085.6	4305498	4306573	44	10	1.67042	4.29464	3.4952	110355(Grk2)
NC_000071.6	45449983	45450473	11	1	2.61119	2.3056	3.10048	110391(Qdpr)
NC_000071.6	108660453	108660876	11	1	2.61119	2.3056	3.10048	110524(Dgkq),15932(Idua)
NC_000070.6	143161556	143162763	50	8	2.10373	4.22179	5.13708	110593(Prdm2)
NC_000078.6	101957688	101958486	30	1	3.70166	2.85083	6.57133	110616(Atxn3)
NC_000082.6	93883672	93884317	23	1	3.4076	2.7038	5.157	110749(Chaf1b)
NC_000070.6	46343223	46345417	89	22	1.40269	5.22491	4.44146	110805(Foxe1)
NC_000080.6	122534008	122534726	14	0	3.86758	1.93379	4.81648	110821(Pcca)
NC_000080.6	122594482	122595061	16	3	2.01139	3.00569	3.03428	110821(Pcca)
NC_000073.6	35555222	35555877	23	0	4.4076	2.2038	NA	110959(Nudt19)
NC_000074.6	124948378	124949759	41	9	1.72865	4.18625	3.46696	112405(Egln1)
NC_000073.6	27166055	27167158	46	8	2.00989	4.17487	4.48604	112406(Egln2)
NC_000070.6	53063068	53063387	8	0	3.28066	1.64033	3.31133	11303(Abca1)
NC_000068.7	25428334	25429230	38	4	2.6435	3.64368	5.43515	11305(Abca2)
NC_000067.6	156558337	156559466	60	15	1.47938	4.73969	3.70969	11352(Abl2)
NC_000069.6	153943991	153944667	16	3	2.01139	3.00569	3.03428	11364(Acadm)
NC_000072.6	15174945	15175441	8	0	3.28066	1.64033	3.31133	114142(Foxp2)
NC_000077.6	81099322	81099838	10	0	3.51122	1.75561	3.61236	11418(Asic2)
NC_000077.6	81629495	81630207	21	3	2.30762	3.15381	3.35694	11418(Asic2)
NC_000081.6	81872294	81873028	17	2	2.4921	2.83101	3.7876	11429(Aco2)
NC_000077.6	116198604	116199230	15	1	2.94173	2.47087	3.91339	11430(Acox1),69535(Ten1)
NC_000082.6	97851135	97852250	45	8	1.98518	4.16251	4.48604	114604(Prdm15)
NC_000071.6	142905415	142906503	47	7	2.204	4.102	5.17358	11461(Actb)
NC_000071.6	134195331	134195786	13	1	2.78831	2.39415	3.64039	114674(Gtf2ird2)
NC_000068.7	117120607	117121945	52	13	1.5105	4.5626	3.43266	114715(Spred1)
NC_000075.6	119401919	119402800	41	8	1.88065	4.11025	3.8548	11481(Acvr2b)
NC_000075.6	45429972	45431385	58	13	1.63372	4.62422	3.98059	114873(Dscaml1),74602(4833428L15Rik)
NC_000074.6	123477556	123478372	41	8	1.88065	4.11025	3.8548	114896(Afg3l1)
NC_000080.6	21075747	21076255	13	2	2.20335	2.68664	3.03833	11534(Adk)
NC_000071.6	35280413	35281124	28	4	2.3031	3.47348	3.9781	11553(Adra2c)
NC_000067.6	177796094	177796998	48	6	2.42034	4.01752	5.69855	11566(Adss)
NC_000072.6	140623252	140624561	67	18	1.35627	4.92606	3.53754	11569(Aebp2)
NC_000076.6	44003421	44004521	28	5	2.04007	3.605	3.46164	11630(Crybg1)
NC_000073.6	27591346	27592328	48	7	2.22769	4.11385	5.17358	11652(Akt2)
NC_000071.6	121593139	121593581	17	1	3.07706	2.53853	4.4643	11669(Aldh2)
NC_000072.6	34316974	34317592	14	1	2.86758	2.43379	3.91339	11677(Akr1b3)
NC_000067.6	164248683	164249480	56	3	3.40145	3.70073	9.06065	116914(Slc19a2)
NC_000083.6	24695704	24696495	32	6	1.96614	3.79042	3.43979	11692(Gfer),71893(Noxo1)
NC_000069.6	107594821	107595568	29	4	2.34205	3.49296	3.9781	11694(Alx3)
NC_000076.6	80806690	80807922	38	9	1.6435	4.14368	3.08023	11705(Amh)
NC_000071.6	114380099	114381214	45	8	1.98518	4.16251	4.48604	117146(Ube3b),330171(Kctd10)
NC_000076.6	127211237	127211983	29	6	1.85663	3.73567	3.01816	117150(Pip4k2c)
NC_000074.6	46210508	46211402	37	6	2.12823	3.87147	4.3168	11739(Slc25a4)
NC_000067.6	161250630	161251403	30	5	2.11669	3.64331	3.6849	11758(Prdx6)
NC_000070.6	155991792	155993143	56	11	1.81649	4.49321	4.50079	117592(B3galt6),20318(Sdf4)
NC_000077.6	4946869	4948208	66	15	1.58717	4.79359	4.24841	11764(Ap1b1),380684(Nefh)
NC_000074.6	109778401	109779068	24	0	4.4545	2.22725	NA	11765(Ap1g1)
NC_000079.6	94358800	94359751	34	5	2.25613	3.71303	4.37016	11774(Ap3b1),328309(Gm9776)
NC_000078.6	51690956	51692300	44	11	1.54489	4.35741	3.15925	11782(Ap4s1),94186(Strn3)
NC_000075.6	7836839	7837278	11	1	2.61119	2.3056	3.10048	11797(Birc2)
NC_000075.6	31210890	31212245	49	9	1.92898	4.28642	4.4808	11804(Aplp2)
NC_000072.6	28423310	28424176	42	9	1.75569	4.19977	3.66464	11844(Arf5)
NC_000078.6	69371646	69373059	60	9	2.15745	4.40065	5.99013	11845(Arf6)
NC_000075.6	108306241	108307145	53	7	2.33933	4.16967	5.85893	11848(Rhoa)
NC_000073.6	113207301	113208031	26	5	1.95796	3.56394	3.02404	11865(Arntl)
NC_000071.6	145113880	145115042	30	6	1.8943	3.75451	3.22741	11867(Arpc1b)
NC_000067.6	160998910	160999411	16	3	2.01139	3.00569	3.03428	11905(Serpinc1)
NC_000074.6	108703500	108705314	107	32	1.09134	5.59006	3.45053	11906(Zfhx3)
NC_000081.6	100227587	100228722	49	3	3.2509	3.62545	7.98226	11908(Atf1)
NC_000068.7	73891998	73892619	20	1	3.25417	2.62709	4.59735	11909(Atf2)
NC_000069.6	101603875	101604952	56	11	1.81649	4.49321	4.50079	11928(Atp1a1)
NC_000075.6	96363497	96364930	56	9	2.07952	4.36169	5.33213	11933(Atp1b3)
NC_000071.6	122501103	122503019	101	20	1.67774	5.23119	6.12008	11938(Atp2a2)
NC_000082.6	44139644	44140544	44	9	1.80792	4.22589	3.865	11964(Atp6v1a),72117(Naa50)
NC_000071.6	67846876	67847722	40	6	2.21554	3.91512	4.76955	11980(Atp8a1)
NC_000068.7	168741154	168742480	44	11	1.54489	4.35741	3.15925	11981(Atp9a)
NC_000071.6	148399507	148400179	23	1	3.4076	2.7038	5.157	11987(Slc7a1)
NC_000072.6	83054528	83055463	35	7	1.87346	3.93673	3.43645	11993(Aup1),64704(Htra2)
NC_000077.6	120086362	120087145	20	0	4.25417	2.12709	6.0206	12009(Cep131)
NC_000082.6	87698471	87699563	41	8	1.88065	4.11025	3.8548	12013(Bach1)
NC_000070.6	32238354	32239941	81	21	1.35986	5.13936	3.88569	12014(Bach2)
NC_000068.7	152830910	152831585	15	0	3.94173	1.97087	4.81648	12048(Bcl2l1)
NC_000073.6	127708262	127709221	41	5	2.46562	3.81777	5.3142	12055(Bcl7c),791073(Mir762)
NC_000068.7	143914600	143915602	37	2	3.35062	3.26027	6.95833	12075(Bfsp1),56431(Dstn)
NC_000068.7	128127046	128128036	37	5	2.35062	3.76027	4.83828	12125(Bcl2l11)
NC_000080.6	67008099	67008900	31	3	2.73813	3.36907	5.09648	12177(Bnip3l)
NC_000081.6	76476907	76477891	30	2	3.11669	3.14331	5.60081	12181(Bop1),15499(Hsf1)
NC_000075.6	44379182	44379960	23	3	2.4076	3.2038	3.59865	12282(Hyou1)
NC_000074.6	84558776	84559884	34	3	2.8411	3.42055	5.6101	12286(Cacna1a)
NC_000072.6	119108157	119109012	47	9	1.88207	4.26296	4.2732	12288(Cacna1c)
NC_000072.6	119107231	119108042	25	5	1.9146	3.54226	3.02404	12288(Cacna1c)
NC_000072.6	119175013	119175724	40	4	2.70096	3.67241	5.93488	12288(Cacna1c),319618(Dcp1b)
NC_000072.6	47813073	47813769	25	0	4.49956	2.24978	NA	12304(Pdia4)
NC_000073.6	16923656	16924370	29	6	1.85663	3.73567	3.01816	12315(Calm3)
NC_000080.6	20733933	20734878	37	5	2.35062	3.76027	4.83828	12325(Camk2g),17423(Ndst2)
NC_000080.6	31336322	31337259	38	2	3.38047	3.2752	6.95833	12339(Capn7)
NC_000072.6	17636674	17637831	40	7	2.02289	4.01145	4.28648	12343(Capza2)
NC_000070.6	139192452	139193660	40	4	2.70096	3.67241	5.93488	12345(Capzb)
NC_000074.6	104534002	104535001	30	5	2.11669	3.64331	3.6849	12354(Car7),234664(Nae1)
NC_000075.6	120933020	120934175	59	13	1.65303	4.63387	4.16805	12387(Ctnnb1)
NC_000074.6	105170377	105171791	74	16	1.62931	4.90212	4.84405	12400(Cbfb)
NC_000075.6	44233422	44234504	53	10	1.8799	4.39938	4.48643	12402(Cbl)
NC_000072.6	51470228	51471435	47	6	2.39665	4.00568	5.69855	12417(Cbx3),53379(Hnrnpa2b1)
NC_000077.6	119085434	119086678	62	10	2.05701	4.48794	5.74704	12418(Cbx4)
NC_000067.6	6214333	6215285	36	7	1.90494	3.95247	3.645	12421(Rb1cc1),654788(4732440D04Rik)
NC_000069.6	36571420	36572220	32	5	2.18853	3.67923	3.91086	12428(Ccna2)
NC_000073.6	38106690	38108095	65	12	1.86945	4.63517	5.32351	12447(Ccne1)
NC_000071.6	93205498	93206581	41	8	1.88065	4.11025	3.8548	12453(Ccni),75610(2010109A12Rik)
NC_000069.6	51224714	51225593	55	13	1.57376	4.59424	3.79547	12457(Noct)
NC_000077.6	22990398	22990973	15	0	3.94173	1.97087	4.81648	12464(Cct4)
NC_000072.6	85450953	85451781	27	2	2.99975	3.08484	5.06563	12468(Cct7),73327(Pradc1)
NC_000083.6	42875976	42877082	47	10	1.74457	4.33172	3.8843	12488(Cd2ap)
NC_000071.6	92504841	92505790	32	3	2.77349	3.38675	5.09648	12492(Scarb2)
NC_000078.6	84408490	84409376	35	8	1.70354	4.02169	3.04994	12499(Entpd5),72873(Bbof1)
NC_000075.6	21142265	21142788	15	2	2.35677	2.76335	3.285	12539(Cdc37)
NC_000082.6	38712451	38713481	34	7	1.8411	3.92055	3.43645	12549(Arhgap31)
NC_000077.6	80476426	80477851	65	16	1.48243	4.82868	3.93693	12569(Cdk5r1)
NC_000073.6	143459012	143460338	60	12	1.77894	4.58991	4.71961	12577(Cdkn1c)
NC_000073.6	143460361	143461628	58	15	1.44108	4.72054	3.36246	12577(Cdkn1c)
NC_000070.6	109665779	109666326	14	2	2.28262	2.72627	3.285	12580(Cdkn2c)
NC_000079.6	35740634	35742496	105	23	1.5293	5.34961	5.52764	12593(Cdyl)
NC_000068.7	167688448	167690342	75	17	1.56206	4.95096	4.52052	12608(Cebpb)
NC_000079.6	81783230	81783842	15	2	2.35677	2.76335	3.285	12626(Cetn3)
NC_000078.6	54862312	54863246	50	6	2.4663	4.04051	6.17324	12632(Cfl2)
NC_000067.6	58711384	58711945	17	2	2.4921	2.83101	3.7876	12633(Cflar)
NC_000072.6	103680703	103681311	16	3	2.01139	3.00569	3.03428	12661(Chl1)
NC_000085.6	44106924	44107506	21	3	2.30762	3.15381	3.35694	12675(Chuk)
NC_000076.6	80167850	80168299	19	1	3.19812	2.59906	4.74185	12696(Cirbp)
NC_000082.6	10784260	10785886	75	13	1.92463	4.76967	5.94699	12703(Socs1)
NC_000072.6	87850306	87851475	53	7	2.33933	4.16967	5.85893	12785(Cnbp)
NC_000080.6	46787764	46788579	32	5	2.18853	3.67923	3.91086	12793(Cnih1)
NC_000085.6	5098009	5098865	24	4	2.13257	3.38821	3.28004	12794(Cnih2)
NC_000078.6	51593012	51593785	32	7	1.77349	3.88675	3.02827	12810(Coch)
NC_000076.6	77136954	77137532	15	1	2.94173	2.47087	3.91339	12822(Col18a1),665762(Gm7775)
NC_000068.7	27886115	27887091	40	9	1.70096	4.17241	3.46696	12831(Col5a1)
NC_000075.6	57521032	57521854	34	8	1.67117	4.00551	3.04994	12858(Cox5a)
NC_000071.6	115348495	115349167	33	7	1.80779	3.9039	3.23081	12861(Cox6a1)
NC_000081.6	35937647	35938195	15	2	2.35677	2.76335	3.285	12864(Cox6c)
NC_000085.6	3323058	3323788	27	4	2.26278	3.45332	3.74275	12894(Cpt1a)
NC_000076.6	95314636	95315229	15	1	2.94173	2.47087	3.91339	12905(Cradd)
NC_000067.6	64532329	64533782	52	6	2.5105	4.0626	6.41286	12912(Creb1)
NC_000084.6	3337104	3337673	16	1	3.01139	2.50569	4.18809	12916(Crem),633947(Gm6225)
NC_000076.6	128337601	128338257	20	2	2.66921	2.91957	3.75443	12974(Cs)
NC_000085.6	53600093	53600961	51	11	1.71101	4.44047	3.91087	13006(Smc3)
NC_000071.6	33274491	33275463	40	6	2.21554	3.91512	4.76955	13016(Ctbp1)
NC_000071.6	136566060	136568041	98	20	1.64344	5.21404	5.93324	13047(Cux1)
NC_000071.6	136371377	136371923	13	1	2.78831	2.39415	3.64039	13047(Cux1)
NC_000071.6	122049326	122050542	66	16	1.49971	4.83732	3.93693	13048(Cux2)
NC_000078.6	108333928	108334882	42	7	2.07761	4.03881	4.50509	13116(Cyp46a1)
NC_000075.6	108263027	108264371	67	9	2.28227	4.46306	6.88974	13138(Dag1)
NC_000083.6	50292526	50293940	59	8	2.29046	4.31516	6.25905	13164(Dazl)
NC_000071.6	88764607	88765835	35	7	1.87346	3.93673	3.43645	13178(Dck)
NC_000072.6	83165594	83166261	26	5	1.95796	3.56394	3.02404	13191(Dctn1)
NC_000081.6	64311926	64313140	53	8	2.16941	4.25463	5.35801	13196(Asap1)
NC_000070.6	138304608	138305118	13	2	2.20335	2.68664	3.03833	13200(Ddost)
NC_000086.7	13281095	13282158	25	3	2.49956	3.24978	4.08961	13205(Ddx3x)
NC_000067.6	153486817	153487808	32	7	1.77349	3.88675	3.02827	13211(Dhx9)
NC_000067.6	182281939	182283079	40	8	1.85297	4.09641	3.8548	13244(Degs1)
NC_000081.6	76511437	76512190	31	6	1.93078	3.77274	3.43979	13350(Dgat1)
NC_000079.6	92354358	92355248	34	1	3.8411	2.92055	7.42783	13361(Dhfr),17686(Msh3)
NC_000082.6	31663669	31664701	54	15	1.36041	4.68021	3.02569	13383(Dlg1)
NC_000068.7	18392335	18392749	13	0	3.78831	1.89415	4.51545	13418(Dnajc1)
NC_000068.7	32352641	32353565	37	6	2.12823	3.87147	4.3168	13429(Dnm1)
NC_000075.6	20952291	20952846	22	3	2.3587	3.17935	3.59865	13433(Dnmt1)
NC_000071.6	124353464	124354967	60	16	1.39191	4.78342	3.41922	13445(Cdk2ap1)
NC_000084.6	34372714	34373505	30	5	2.11669	3.64331	3.6849	13476(Reep5)
NC_000071.6	108268686	108269287	15	2	2.35677	2.76335	3.285	13486(Dr1)
NC_000079.6	54054784	54056021	37	8	1.76566	4.05276	3.44661	13488(Drd1)
NC_000076.6	79950353	79950999	20	1	3.25417	2.62709	4.59735	13496(Arid3a)
NC_000072.6	124745200	124746146	34	4	2.51917	3.58151	4.94184	13498(Atn1)
NC_000082.6	96884484	96884914	8	0	3.28066	1.64033	3.31133	13508(Dscam)
NC_000080.6	68646939	68647382	13	2	2.20335	2.68664	3.03833	13522(Adam28)
NC_000078.6	3572034	3572943	43	10	1.6446	4.28173	3.30472	13528(Dtnb)
NC_000070.6	155846956	155848296	55	9	2.05919	4.35152	5.33213	13542(Dvl1)
NC_000079.6	29983691	29984969	72	9	2.36379	4.50382	7.34802	13557(E2f3)
NC_000069.6	14578503	14579335	33	6	2.00044	3.80757	3.6551	13559(E2f5)
NC_000068.7	153740964	153741940	45	7	2.1551	4.07755	4.94875	13589(Mapre1)
NC_000073.6	137313164	137314861	58	12	1.74064	4.57076	4.32705	13593(Ebf3)
NC_000072.6	122339179	122340319	57	13	1.61408	4.61439	3.98059	13619(Phc1)
NC_000075.6	78481381	78481984	23	4	2.08567	3.36476	3.05312	13627(Eef1a1)
NC_000068.7	181156578	181156999	10	0	3.51122	1.75561	3.61236	13628(Eef1a2)
NC_000069.6	89337483	89338197	32	6	1.96614	3.79042	3.43979	13639(Efna4)
NC_000084.6	46596920	46597933	50	6	2.4663	4.04051	6.17324	13664(Eif1a),66676(Tmed7)
NC_000076.6	61452127	61452975	27	5	1.99975	3.58484	3.24128	13688(Eif4ebp2)
NC_000067.6	132007314	132008339	53	5	2.75437	3.96215	7.03007	13714(Elk4)
NC_000074.6	70539447	70540014	28	6	1.81768	3.71619	3.01816	13716(Ell)
NC_000085.6	7341189	7341806	35	4	2.55154	3.5977	4.94184	13728(Mark2)
NC_000067.6	182019103	182020693	69	20	1.24518	5.01491	3.18537	13800(Enah)
NC_000068.7	30171344	30172001	25	5	1.9146	3.54226	3.02404	13804(Endog)
NC_000068.7	32646534	32647037	11	1	2.61119	2.3056	3.10048	13805(Eng)
NC_000072.6	124769238	124769794	23	2	2.82263	2.99628	4.27364	13807(Eno2)
NC_000084.6	34006115	34007525	35	8	1.70354	4.02169	3.04994	13824(Epb41l4a)
NC_000070.6	136834856	136836010	41	9	1.72865	4.18625	3.46696	13844(Ephb2)
NC_000072.6	41605005	41605865	28	6	1.81768	3.71619	3.01816	13848(Ephb6)
NC_000074.6	71380927	71382499	66	16	1.49971	4.83732	3.93693	13864(Nr2f6)
NC_000073.6	19381828	19382539	38	8	1.79551	4.06768	3.44661	13871(Ercc2)
NC_000073.6	25249207	25249993	29	6	1.85663	3.73567	3.01816	13875(Erf)
NC_000068.7	6871915	6873049	48	10	1.76826	4.34356	3.8843	14007(Celf2)
NC_000069.6	30508242	30509971	58	13	1.63372	4.62422	3.98059	14013(Mecom)
NC_000071.6	107868365	107869670	51	10	1.83654	4.3777	4.28341	14020(Evi5)
NC_000081.6	53345771	53346558	32	1	3.77349	2.88675	6.85627	14042(Ext1)
NC_000073.6	80370903	80371824	34	5	2.25613	3.71303	4.37016	140481(Man2a2)
NC_000070.6	155891370	155892686	49	11	1.66594	4.41793	3.71899	140500(Acap3),433813(Pusl1)
NC_000077.6	101225845	101226791	24	4	2.13257	3.38821	3.28004	14055(Ezh1)
NC_000072.6	47594241	47595712	61	16	1.4106	4.79276	3.41922	14056(Ezh2)
NC_000070.6	32950454	32951235	30	5	2.11669	3.64331	3.6849	140577(Ankrd6)
NC_000070.6	116017110	116018119	38	8	1.79551	4.06768	3.44661	14073(Faah)
NC_000071.6	147076090	147076788	19	2	2.61315	2.89154	3.498	140887(Lnx2)
NC_000077.6	120823535	120824735	45	10	1.69567	4.30727	3.68844	14104(Fasn)
NC_000070.6	135855587	135856724	50	6	2.4663	4.04051	6.17324	14105(Srsf10)
NC_000068.7	125505351	125506139	25	5	1.9146	3.54226	3.02404	14118(Fbn1)
NC_000080.6	63164357	63165184	25	2	2.9146	3.04226	4.80008	14137(Fdft1)
NC_000075.6	51962904	51963665	22	4	2.03677	3.34031	3.05312	14148(Fdx1)
NC_000086.7	151046887	151047826	24	2	2.86954	3.01973	4.53604	14163(Fgd1)
NC_000086.7	59133856	59135188	35	1	3.87346	2.93673	7.42783	14168(Fgf13)
NC_000085.6	45742402	45743427	55	13	1.57376	4.59424	3.79547	14179(Fgf8)
NC_000074.6	25518414	25520110	65	18	1.32197	4.90891	3.37359	14182(Fgfr1)
NC_000080.6	9673039	9673553	12	1	2.70316	2.35158	3.36932	14198(Fhit)
NC_000080.6	9610850	9611328	8	0	3.28066	1.64033	3.31133	14198(Fhit)
NC_000070.6	124700469	124701091	31	6	1.93078	3.77274	3.43979	14201(Fhl3)
NC_000071.6	31219827	31220951	42	3	3.07761	3.53881	6.91732	14208(Ppm1g)
NC_000068.7	102450728	102451928	47	11	1.61904	4.39448	3.52967	14221(Fjx1)
NC_000072.6	128437889	128439087	43	7	2.10403	4.05201	4.50509	14228(Fkbp4),791299(Gm10069)
NC_000074.6	70527582	70528354	34	8	1.67117	4.00551	3.04994	14232(Fkbp8)
NC_000074.6	121117289	121118149	36	6	2.09759	3.85615	4.09376	14234(Foxc2)
NC_000077.6	60726767	60727611	38	6	2.15808	3.88639	4.3168	14248(Flii)
NC_000067.6	131526180	131526860	21	3	2.30762	3.15381	3.35694	14270(Srgap2)
NC_000085.6	41829725	41830983	51	10	1.83654	4.3777	4.28341	14296(Frat1)
NC_000074.6	91133577	91134216	27	4	2.26278	3.45332	3.74275	14339(Aktip)
NC_000069.6	34019432	34020836	70	18	1.40587	4.95086	3.70387	14359(Fxr1)
NC_000076.6	39388619	39389147	11	1	2.61119	2.3056	3.10048	14360(Fyn)
NC_000073.6	57590685	57591805	51	7	2.29597	4.14798	5.62876	14402(Gabrb3)
NC_000068.7	70561818	70562332	13	2	2.20335	2.68664	3.03833	14415(Gad1),68986(Gad1os)
NC_000084.6	24205112	24206606	52	10	1.85842	4.38864	4.48643	14423(Galnt1)
NC_000071.6	129724825	129725698	37	2	3.35062	3.26027	6.95833	14467(Nipsnap2)
NC_000076.6	123196437	123197358	51	9	1.97404	4.30895	4.69059	14479(Usp15)
NC_000074.6	70330459	70331550	34	7	1.8411	3.92055	3.43645	14559(Gdf1),19704(Upf1),93898(Cers1)
NC_000086.7	74304824	74305305	7	0	3.14533	1.57266	3.0103	14567(Gdi1)
NC_000071.6	107720863	107721949	49	13	1.44355	4.52913	3.08052	14581(Gfi1)
NC_000080.6	70890740	70891271	20	3	2.25417	3.12709	3.11807	14586(Gfra2)
NC_000079.6	14063335	14065135	61	15	1.49806	4.74903	3.70969	14593(Ggps1),94246(Arid4b)
NC_000070.6	40853353	40854288	33	6	2.00044	3.80757	3.6551	14595(B4galt1)
NC_000077.6	102818402	102819724	60	7	2.47938	4.23969	7.03267	14615(Gjc1)
NC_000068.7	114013234	114014174	31	6	1.93078	3.77274	3.43979	14617(Gjd2),320846(A530058N18Rik)
NC_000077.6	55547917	55548351	8	0	3.28066	1.64033	3.31133	14654(Glra1)
NC_000080.6	34310238	34311284	47	4	2.88207	3.76296	6.95083	14661(Glud1),75698(Shld2)
NC_000083.6	35979631	35980168	9	0	3.40171	1.70086	3.61236	14670(Gnl1),75210(Prr3)
NC_000076.6	81544363	81545660	51	8	2.12604	4.23295	5.13708	14672(Gna11)
NC_000071.6	140829859	140830593	28	6	1.81768	3.71619	3.01816	14673(Gna12)
NC_000085.6	16132267	16133844	92	22	1.44037	5.24374	4.60967	14682(Gnaq)
NC_000072.6	134897606	134898202	19	2	2.61315	2.89154	3.498	14760(Gpr19),72813(2810454H06Rik)
NC_000072.6	99691719	99693789	73	20	1.30903	5.04683	3.50002	14761(Gpr27)
NC_000074.6	33691366	33691732	8	0	3.28066	1.64033	3.31133	14782(Gsr)
NC_000080.6	34819252	34820827	73	18	1.45342	4.97464	4.04335	14803(Grid1)
NC_000082.6	9737905	9738418	14	2	2.28262	2.72627	3.285	14811(Grin2a)
NC_000073.6	45832552	45834142	73	15	1.70135	4.85067	4.99657	14814(Grin2d)
NC_000073.6	45865753	45866804	55	15	1.38112	4.69056	3.19271	14814(Grin2d)
NC_000072.6	28133480	28134115	18	2	2.55422	2.86207	3.498	14823(Grm8)
NC_000068.7	121413377	121414608	61	13	1.69071	4.65271	4.35777	14827(Pdia3),212670(Catsper2)
NC_000082.6	11253235	11254225	59	7	2.46039	4.23019	6.79508	14852(Gspt1)
NC_000071.6	134313365	134314896	68	16	1.53351	4.85422	4.11414	14886(Gtf2i)
NC_000072.6	113045972	113046528	16	3	2.01139	3.00569	3.03428	14911(Thumpd3)
NC_000067.6	180812983	180814403	78	14	1.86958	4.84168	5.95725	15078(H3f3a),666457(G370120E05Rik)
NC_000077.6	116023895	116024639	23	4	2.08567	3.36476	3.05312	15081(H3f3b)
NC_000069.6	89159644	89160608	34	8	1.67117	4.00551	3.04994	15168(Hcn3)
NC_000076.6	36973773	36975315	73	12	2.00091	4.70089	6.15378	15182(Hdac2)
NC_000069.6	87906055	87907090	37	6	2.12823	3.87147	4.3168	15191(Hdgf)
NC_000070.6	99657353	99658176	31	5	2.15317	3.66155	3.91086	15221(Foxd3)
NC_000079.6	98354124	98355133	46	12	1.47937	4.44013	3.02796	15229(Foxd1)
NC_000069.6	116661891	116663000	44	10	1.67042	4.29464	3.4952	15247(Mfsd14a)
NC_000077.6	75168016	75169555	87	23	1.31547	5.2427	4.01185	15248(Hic1)
NC_000078.6	73907509	73908886	63	9	2.21261	4.42823	6.21277	15251(Hif1a)
NC_000077.6	54865995	54867061	43	6	2.29667	3.95569	4.99902	15254(Hint1)
NC_000068.7	104492955	104494222	50	11	1.68869	4.42931	3.91087	15259(Hipk3)
NC_000076.6	13965520	13966691	40	8	1.85297	4.09641	3.8548	15273(Hivep2)
NC_000070.6	133967032	133968444	68	20	1.22865	5.00664	3.03172	15331(Hmgn2)
NC_000076.6	81349913	81350956	37	8	1.76566	4.05276	3.44661	15353(Hmg20b)
NC_000086.7	71556191	71557151	36	5	2.31998	3.74495	4.60319	15354(Hmgb3)
NC_000081.6	101266570	101267141	27	5	1.99975	3.58484	3.24128	15370(Nr4a1)
NC_000077.6	51605935	51607093	52	10	1.85842	4.38864	4.48643	15384(Hnrnpab)
NC_000079.6	58401130	58402365	66	17	1.41725	4.87855	3.64582	15387(Hnrnpk),74386(Rmi1)
NC_000072.6	52190994	52192164	72	13	1.87836	4.74654	5.53877	15400(Hoxa3),15401(Hoxa4)
NC_000072.6	52208511	52209103	19	1	3.19812	2.59906	4.74185	15400(Hoxa3),15403(Hoxa6),72628(Hoxaas3)
NC_000077.6	96271340	96272910	54	9	2.03848	4.34117	5.11635	15417(Hoxb9)
NC_000081.6	103013893	103014589	23	4	2.08567	3.36476	3.05312	15424(Hoxc5)
NC_000068.7	74736068	74736501	15	2	2.35677	2.76335	3.285	15434(Hoxd3)
NC_000070.6	40722214	40723278	50	7	2.27366	4.13683	5.62876	15502(Dnaja1),387203(Mir207),622208(Gm6297)
NC_000067.6	88205215	88206034	27	4	2.26278	3.45332	3.74275	15504(Dnajb3),22236(Ugt1a2),394430(Ugt1a10),394432(Ugt1a7c),394433(Ugt1a5),394434(Ugt1a9),394435(Ugt1a6b),94284(Ugt1a6a)
NC_000067.6	55087459	55088591	49	8	2.08098	4.21041	4.91805	15510(Hspd1),15528(Hspe1)
NC_000083.6	45572480	45573119	16	2	2.42642	2.79817	3.53488	15516(Hsp90ab1)
NC_000084.6	60747739	60749140	64	11	1.96739	4.56866	5.52586	15531(Ndst1)
NC_000074.6	4324553	4325316	23	4	2.08567	3.36476	3.05312	15568(Elavl1),20300(Ccl25)
NC_000075.6	22050299	22051351	44	10	1.67042	4.29464	3.4952	15571(Elavl3)
NC_000067.6	65186412	65187154	30	6	1.8943	3.75451	3.22741	15926(Idh1),18711(Pikfyve)
NC_000067.6	155098146	155099440	44	7	2.12985	4.06492	4.72589	15939(Ier5)
NC_000082.6	91485051	91485789	25	5	1.9146	3.54226	3.02404	15975(Ifnar1)
NC_000076.6	19591842	19592649	34	6	2.03374	3.82423	3.87315	15979(Ifngr1)
NC_000075.6	50561082	50561717	15	1	2.94173	2.47087	3.91339	16173(Il18),66654(Tex12)
NC_000082.6	26605101	26605595	11	1	2.61119	2.3056	3.10048	16180(Il1rap)
NC_000079.6	112463797	112464513	40	7	2.02289	4.01145	4.28648	16195(Il6st)
NC_000072.6	94699220	94700608	62	15	1.51644	4.75822	3.88697	16206(Lrig1)
NC_000077.6	97186838	97188777	91	17	1.78158	5.06072	6.21578	16211(Kpnb1)
NC_000068.7	155956340	155956989	20	3	2.25417	3.12709	3.11807	16328(Cep250)
NC_000073.6	101836305	101837227	26	4	2.221	3.43243	3.51	16332(Inppl1)
NC_000074.6	3279128	3279766	21	3	2.30762	3.15381	3.35694	16337(Insr)
NC_000081.6	43282219	43282774	12	1	2.70316	2.35158	3.36932	16341(Eif3e)
NC_000070.6	48279245	48279763	11	1	2.61119	2.3056	3.10048	16348(Invs),76299(Erp44)
NC_000077.6	102467069	102467363	8	0	3.28066	1.64033	3.31133	16399(Itga2b)
NC_000080.6	73384615	73385705	48	11	1.64273	4.40633	3.52967	16432(Itm2b)
NC_000070.6	101264536	101265294	33	4	2.48586	3.56486	4.69786	16451(Jak1)
NC_000085.6	29251096	29252326	69	10	2.17807	4.54847	6.62225	16452(Jak2)
NC_000079.6	44733369	44733977	25	3	2.49956	3.24978	4.08961	16468(Jarid2)
NC_000070.6	95050320	95051185	27	3	2.58471	3.29236	4.33845	16476(Jun)
NC_000069.6	107035727	107036913	42	9	1.75569	4.19977	3.66464	16491(Kcna3)
NC_000073.6	46396198	46397204	40	7	2.02289	4.01145	4.28648	16502(Kcnc1)
NC_000073.6	143106880	143107964	32	5	2.18853	3.67923	3.91086	16535(Kcnq1)
NC_000079.6	46929045	46930317	44	10	1.67042	4.29464	3.4952	16553(Kif13a)
NC_000080.6	64652389	64652978	14	2	2.28262	2.72627	3.285	16554(Kif13b)
NC_000068.7	142901111	142901713	24	4	2.13257	3.38821	3.28004	16558(Kif16b)
NC_000073.6	79709778	79710641	31	6	1.93078	3.77274	3.43979	16576(Kif7)
NC_000067.6	163779357	163779936	11	1	2.61119	2.3056	3.10048	16579(Kifap3)
NC_000067.6	170214875	170215598	27	4	2.26278	3.45332	3.74275	16589(Uhmk1)
NC_000085.6	5117614	5118638	58	14	1.53418	4.67398	3.65981	16594(Klc2)
NC_000074.6	84902719	84903556	26	5	1.95796	3.56394	3.02404	16596(Klf1)
NC_000085.6	23140714	23141943	35	8	1.70354	4.02169	3.04994	16601(Klf9)
NC_000080.6	61439133	61440317	61	11	1.9131	4.54151	5.11006	16648(Kpna3)
NC_000069.6	69126340	69127462	61	11	1.9131	4.54151	5.11006	16649(Kpna4)
NC_000068.7	160365740	160367487	49	11	1.66594	4.41793	3.71899	16658(Mafb)
NC_000077.6	99385719	99386351	17	2	2.4921	2.83101	3.7876	16661(Krt10)
NC_000077.6	79145805	79146693	36	5	2.31998	3.74495	4.60319	16706(Ksr1)
NC_000080.6	47649037	47649941	37	6	2.12823	3.87147	4.3168	16709(Ktn1)
NC_000067.6	135818277	135819203	43	9	1.7821	4.21298	3.66464	16763(Lad1)
NC_000067.6	38626684	38628101	62	14	1.60955	4.71167	4.20641	16764(Aff3)
NC_000070.6	134468177	134469327	54	6	2.55306	4.08388	6.65389	16765(Stmn1)
NC_000074.6	13158969	13159744	35	7	1.87346	3.93673	3.43645	16783(Lamp1)
NC_000077.6	97799200	97800618	35	7	1.87346	3.93673	3.43645	16796(Lasp1)
NC_000076.6	7680920	7681936	38	8	1.79551	4.06768	3.44661	16798(Lats1),18537(Pcmt1),407824(BC020402)
NC_000073.6	24902591	24903396	45	10	1.69567	4.30727	3.68844	16801(Arhgef1)
NC_000085.6	46038955	46039866	38	7	1.96543	3.98272	3.85629	16825(Ldb1)
NC_000085.6	46044592	46045757	52	13	1.5105	4.5626	3.43266	16825(Ldb1)
NC_000077.6	113649488	113650185	30	4	2.37973	3.51179	4.21584	16834(Cog1),69806(Slc39a11)
NC_000068.7	38350746	38351961	57	15	1.42143	4.71072	3.36246	16870(Lhx2)
NC_000067.6	155742655	155743260	16	3	2.01139	3.00569	3.03428	16872(Lhx4)
NC_000081.6	7129156	7130039	30	6	1.8943	3.75451	3.22741	16880(Lifr)
NC_000077.6	3408931	3409545	17	1	3.07706	2.53853	4.4643	16886(Limk2)
NC_000077.6	60699564	60700381	28	3	2.62503	3.31252	4.58931	16897(Llgl1)
NC_000084.6	56707282	56708609	49	7	2.2509	4.12545	5.40028	16906(Lmnb1)
NC_000069.6	144202113	144202878	37	9	1.61366	4.12876	3.08023	16911(Lmo4)
NC_000076.6	81135804	81138356	103	28	1.23439	5.47518	4.0329	16969(Zbtb7a)
NC_000072.6	134543731	134544052	7	0	3.14533	1.57266	3.0103	16974(Lrp6)
NC_000069.6	129533378	129534247	42	7	2.07761	4.03881	4.50509	170439(Elovl6)
NC_000079.6	113617659	113618884	43	6	2.29667	3.95569	4.99902	170625(Snx18)
NC_000082.6	5049650	5050806	45	7	2.1551	4.07755	4.94875	170644(Ubn1),74022(Glyr1)
NC_000070.6	137593890	137594813	33	7	1.80779	3.9039	3.23081	170707(Usp48)
NC_000083.6	87636235	87637200	47	11	1.61904	4.39448	3.52967	17075(Epcam)
NC_000069.6	9608933	9610237	55	14	1.47422	4.644	3.48244	170753(Zfp704)
NC_000067.6	9797746	9798749	45	11	1.57014	4.37003	3.34305	170755(Sgk3)
NC_000067.6	180725568	180726666	39	9	1.67259	4.15822	3.2721	170760(Acbd3)
NC_000069.6	54807268	54807949	37	7	1.93559	3.96779	3.85629	170767(Rfxap)
NC_000067.6	32284545	32285138	15	2	2.35677	2.76335	3.285	170771(Khdrbs2)
NC_000072.6	8509270	8510393	57	12	1.72099	4.56094	4.32705	170772(Glcci1)
NC_000068.7	156179525	156180296	22	2	2.77374	2.97183	4.27364	170791(Rbm39)
NC_000076.6	67979457	67980268	22	2	2.77374	2.97183	4.27364	170799(Rtkn2)
NC_000069.6	152346295	152347158	40	10	1.56346	4.24116	3.11714	170822(Usp33)
NC_000084.6	61387288	61387643	7	0	3.14533	1.57266	3.0103	170826(Ppargc1b)
NC_000077.6	115535337	115536777	58	5	2.85611	4.01302	7.78488	170930(Sumo2)
NC_000086.7	51204989	51205976	25	2	2.9146	3.04226	4.80008	171170(Mbnl3)
NC_000076.6	37136013	37137343	68	8	2.45104	4.39545	7.4192	17118(Marcks)
NC_000079.6	55325652	55326389	24	4	2.13257	3.38821	3.28004	17121(Mxd3)
NC_000075.6	63757074	63758579	66	12	1.88673	4.64381	5.32351	17127(Smad3)
NC_000079.6	56702605	56703848	51	7	2.29597	4.14798	5.62876	17129(Smad5)
NC_000081.6	79347164	79348247	42	2	3.49265	3.33129	7.78356	17133(Maff)
NC_000077.6	120632895	120633818	41	9	1.72865	4.18625	3.46696	17134(Mafg)
NC_000071.6	139791166	139791945	29	0	4.66398	2.33199	NA	17135(Mafk)
NC_000076.6	54074583	54075441	43	5	2.51907	3.8445	5.55481	17155(Man1a)
NC_000083.6	64601483	64602385	29	6	1.85663	3.73567	3.01816	17158(Man2a1)
NC_000067.6	131096561	131098026	45	12	1.45466	4.42777	3.02796	17164(Mapkapk2)
NC_000071.6	121544974	121546110	53	13	1.53198	4.57334	3.43266	17165(Mapkapk5)
NC_000077.6	32267243	32268012	25	4	2.17764	3.41075	3.51	17168(Nprl3)
NC_000073.6	127025247	127027556	102	26	1.32638	5.41808	4.52374	17188(Maz)
NC_000076.6	80398609	80399775	55	14	1.47422	4.644	3.48244	17192(Mbd3)
NC_000084.6	82474806	82475448	22	4	2.03677	3.34031	3.05312	17196(Mbp)
NC_000069.6	95658288	95659619	53	11	1.75437	4.46215	4.1052	17210(Mcl1)
NC_000076.6	118141591	118142385	38	7	1.96543	3.98272	3.85629	17245(Mdm1)
NC_000076.6	117710115	117710931	36	6	2.09759	3.85615	4.09376	17246(Mdm2)
NC_000086.7	74084838	74086010	32	5	2.18853	3.67923	3.91086	17257(Mecp2)
NC_000069.6	88141846	88143112	56	10	1.94202	4.43044	4.89889	17261(Mef2d)
NC_000073.6	79792974	79793590	15	2	2.35677	2.76335	3.285	17292(Mesp1)
NC_000079.6	31807524	31808969	62	12	1.816	4.60844	4.91898	17300(Foxc1)
NC_000070.6	114907343	114909284	78	19	1.45454	5.0492	4.27037	17301(Foxd2)
NC_000085.6	32485663	32486245	16	2	2.42642	2.79817	3.53488	17330(Minpp1)
NC_000073.6	135715969	135716804	36	5	2.31998	3.74495	4.60319	17345(Mki67)
NC_000069.6	67373853	67374437	12	1	2.70316	2.35158	3.36932	17349(Mlf1)
NC_000068.7	18056320	18057428	57	5	2.83647	4.0032	7.78488	17354(Mllt10)
NC_000071.6	103833586	103834373	22	2	2.77374	2.97183	4.27364	17355(Aff1)
NC_000071.6	103753697	103754818	38	7	1.96543	3.98272	3.85629	17355(Aff1)
NC_000083.6	13759918	13761722	77	17	1.59191	4.96588	4.70171	17356(Afdn),21646(Tcte2)
NC_000069.6	104817483	104818007	18	0	4.13918	2.06959	5.71957	17454(Mov10)
NC_000075.6	14804284	14804857	15	1	2.94173	2.47087	3.91339	17535(Mre11a)
NC_000083.6	87974811	87975819	39	6	2.18716	3.90094	4.5421	17688(Msh6)
NC_000083.6	31855023	31856321	67	14	1.6973	4.75554	4.77287	17691(Sik1)
NC_000086.7	168673589	168674671	29	3	2.66398	3.33199	4.58931	17692(Msl3)
NC_000076.6	20148605	20149555	41	9	1.72865	4.18625	3.46696	17761(Map7)
NC_000072.6	83325841	83326641	31	7	1.73813	3.86907	3.02827	17768(Mthfd2),232157(Mob1a)
NC_000085.6	3388610	3389645	38	8	1.79551	4.06768	3.44661	17771(Tesmin)
NC_000078.6	8921752	8922283	10	0	3.51122	1.75561	3.61236	17775(Laptm4a)
NC_000069.6	89213793	89214538	25	5	1.9146	3.54226	3.02404	17827(Mtx1)
NC_000076.6	21160463	21161442	41	10	1.59115	4.255	3.11714	17863(Myb)
NC_000067.6	9699868	9700974	67	14	1.6973	4.75554	4.77287	17864(Mybl1)
NC_000068.7	163054275	163055085	47	3	3.204	3.602	7.71466	17865(Mybl2)
NC_000077.6	104550143	104550559	12	1	2.70316	2.35158	3.36932	17896(Myl4),217232(Cdc27)
NC_000067.6	51914891	51916238	45	12	1.45466	4.42777	3.02796	17912(Myo1b)
NC_000075.6	75070811	75071969	35	7	1.87346	3.93673	3.43645	17918(Myo5a)
NC_000084.6	74441877	74443100	48	6	2.42034	4.01752	5.69855	17919(Myo5b)
NC_000076.6	108161658	108163255	74	15	1.71677	4.85839	5.18845	17931(Ppp1r12a)
NC_000067.6	52499970	52500762	35	8	1.70354	4.02169	3.04994	17936(Nab1)
NC_000073.6	143548383	143549278	44	2	3.54489	3.35741	8.06012	17955(Nap1l4)
NC_000067.6	43445276	43446606	53	8	2.16941	4.25463	5.35801	17974(Nck2)
NC_000078.6	4476015	4477693	91	23	1.36654	5.26823	4.336	17977(Ncoa1)
NC_000067.6	13372528	13374836	106	29	1.21816	5.51597	4.10152	17978(Ncoa2)
NC_000076.6	92721937	92722780	23	3	2.4076	3.2038	3.59865	17997(Nedd1)
NC_000075.6	72661853	72663195	88	17	1.74349	5.04167	5.82726	17999(Nedd4)
NC_000084.6	80707453	80708767	53	13	1.53198	4.57334	3.43266	18018(Nfatc1)
NC_000073.6	126396178	126396881	23	3	2.4076	3.2038	3.59865	18020(Nfatc2ip)
NC_000072.6	51432527	51433555	28	3	2.62503	3.31252	4.58931	18025(Nfe2l3)
NC_000076.6	81429834	81431312	57	16	1.33397	4.75445	3.08659	18029(Nfic)
NC_000079.6	52980534	52981440	36	8	1.73502	4.03743	3.24675	18030(Nfil3)
NC_000079.6	52978328	52978959	28	6	1.81768	3.71619	3.01816	18030(Nfil3)
NC_000074.6	84799016	84800745	80	23	1.22023	5.19508	3.38813	18032(Nfix)
NC_000069.6	135690762	135691965	58	11	1.85611	4.51302	4.70185	18033(Nfkb1)
NC_000078.6	55491731	55492793	46	8	2.00989	4.17487	4.48604	18035(Nfkbia)
NC_000083.6	48408846	48409848	25	1	3.49956	2.74978	5.72042	18044(Nfya)
NC_000076.6	82763470	82764372	51	4	2.97404	3.80895	7.46594	18045(Nfyb),67933(Hcfc2)
NC_000079.6	49187131	49188055	34	5	2.25613	3.71303	4.37016	18081(Ninj1)
NC_000075.6	121718849	121719848	43	7	2.10403	4.05201	4.50509	18087(Nktr)
NC_000081.6	100388221	100388808	12	0	3.70316	1.85158	4.21442	18174(Slc11a2)
NC_000067.6	62703005	62703865	20	3	2.25417	3.12709	3.11807	18187(Nrp2)
NC_000079.6	55209948	55212797	132	30	1.42077	5.66458	5.91667	18193(Nsd1)
NC_000077.6	68385583	68387201	61	14	1.59117	4.70248	4.02189	18208(Ntn1)
NC_000083.6	24208545	24209645	32	7	1.77349	3.88675	3.02827	18209(Ntn3)
NC_000073.6	27258477	27259281	35	8	1.70354	4.02169	3.04994	18223(Numbl)
NC_000068.7	57114489	57115328	37	5	2.35062	3.76027	4.83828	18227(Nr4a2)
NC_000076.6	80826593	80827415	30	5	2.11669	3.64331	3.6849	18245(Oaz1)
NC_000078.6	17544468	17545576	38	5	2.38047	3.7752	4.83828	18263(Odc1)
NC_000074.6	22398098	22398804	27	3	2.58471	3.29236	4.33845	18408(Slc25a15),69108(1810012K16Rik)
NC_000069.6	40744904	40745845	46	8	2.00989	4.17487	4.48604	18415(Hspa4l)
NC_000069.6	31149575	31150313	25	5	1.9146	3.54226	3.02404	18417(Cldn11)
NC_000071.6	122707447	122707947	21	1	3.30762	2.65381	4.87665	18438(P2rx4)
NC_000076.6	59322898	59323900	35	7	1.87346	3.93673	3.43645	18451(P4ha1)
NC_000077.6	54100661	54101470	44	10	1.67042	4.29464	3.4952	18452(P4ha2)
NC_000068.7	122738341	122738927	13	0	3.78831	1.89415	4.51545	18457(Bloc1s6),75915(Bloc1s6os)
NC_000081.6	36607994	36609855	83	13	2.03963	4.82717	6.9949	18458(Pabpc1)
NC_000077.6	74723371	74724855	59	10	2.00095	4.45991	5.3193	18472(Pafah1b1)
NC_000075.6	45984159	45985064	34	6	2.03374	3.82423	3.87315	18475(Pafah1b2)
NC_000075.6	46012516	46013533	45	7	2.1551	4.07755	4.94875	18475(Pafah1b2),70661(Sik3)
NC_000072.6	102564104	102564785	25	4	2.17764	3.41075	3.51	18488(Cntn3)
NC_000070.6	44703530	44704705	46	11	1.59485	4.38239	3.34305	18507(Pax5),70602(5730488B01Rik)
NC_000074.6	41239444	41240277	31	4	2.41621	3.53003	4.45581	18536(Pcm1)
NC_000076.6	7663120	7663972	27	4	2.26278	3.45332	3.74275	18537(Pcmt1),320642(A630066F11Rik)
NC_000073.6	80401871	80403011	48	9	1.90576	4.27481	4.2732	18550(Furin)
NC_000076.6	80329734	80330402	36	6	2.09759	3.85615	4.09376	18551(Pcsk4),70335(Reep6)
NC_000085.6	4510345	4510940	16	1	3.01139	2.50569	4.18809	18563(Pcx)
NC_000085.6	4614662	4616037	57	9	2.09951	4.37168	5.54974	18563(Pcx),225875(Lrfn4)
NC_000070.6	102462079	102462501	14	2	2.28262	2.72627	3.285	18578(Pde4b)
NC_000069.6	19310515	19311898	56	13	1.5941	4.6044	3.79547	18583(Pde7a)
NC_000067.6	91458944	91459835	37	3	2.93559	3.46779	6.12934	18627(Per2)
NC_000069.6	96635344	96635975	29	3	2.66398	3.33199	4.58931	18632(Pex11b)
NC_000076.6	19907271	19907754	15	2	2.35677	2.76335	3.285	18634(Pex7)
NC_000067.6	130717043	130717627	13	1	2.78831	2.39415	3.64039	18640(Pfkfb2),226418(Yod1)
NC_000071.6	5137305	5137738	8	0	3.28066	1.64033	3.31133	18647(Cdk14)
NC_000075.6	8920143	8920523	7	0	3.14533	1.57266	3.0103	18667(Pgr)
NC_000071.6	8893269	8894241	40	7	2.02289	4.01145	4.28648	18670(Abcb4)
NC_000071.6	8622148	8623147	45	8	1.98518	4.16251	4.48604	18671(Abcb1a),242819(Rundc3b)
NC_000076.6	91123262	91124177	25	5	1.9146	3.54226	3.02404	18674(Slc25a3)
NC_000073.6	116442764	116443955	36	6	2.09759	3.85615	4.09376	18704(Pik3c2a)
NC_000072.6	139789445	139789774	7	0	3.14533	1.57266	3.0103	18705(Pik3c2g)
NC_000079.6	101767346	101768787	55	6	2.57376	4.09424	6.89627	18708(Pik3r1)
NC_000076.6	81292677	81293436	21	1	3.30762	2.65381	4.87665	18717(Pip5k1c)
NC_000068.7	18997664	18998543	40	6	2.21554	3.91512	4.76955	18718(Pip4k2a),74629(4930426L09Rik)
NC_000085.6	24476954	24477823	39	6	2.18716	3.90094	4.5421	18719(Pip5k1b),68034(Fam122a)
NC_000077.6	75587865	75588794	40	6	2.21554	3.91512	4.76955	18738(Pitpna)
NC_000083.6	24549904	24550930	48	8	2.05777	4.19881	4.701	18763(Pkd1)
NC_000068.7	163658194	163658743	25	3	2.49956	3.24978	4.08961	18769(Pkig)
NC_000083.6	31564343	31565933	94	13	2.18102	4.89786	8.07719	18771(Pknox1)
NC_000067.6	4807551	4808325	31	7	1.73813	3.86907	3.02827	18777(Lypla1)
NC_000070.6	94602816	94603446	18	2	2.55422	2.86207	3.498	18786(Plaa),67694(Ift74)
NC_000078.6	105784292	105785424	48	12	1.52725	4.46407	3.20553	18789(Papola)
NC_000068.7	135658966	135660165	53	10	1.8799	4.39938	4.48643	18798(Plcb4)
NC_000068.7	160730808	160731920	44	9	1.80792	4.22589	3.865	18803(Plcg1)
NC_000081.6	76178544	76182075	156	38	1.28018	5.92549	5.78127	18810(Plec)
NC_000077.6	63132403	63133402	31	5	2.15317	3.66155	3.91086	18858(Pmp22)
NC_000078.6	59066664	59067576	30	4	2.37973	3.51179	4.21584	18949(Pnn)
NC_000073.6	79465605	79466404	33	4	2.48586	3.56486	4.69786	18975(Polg)
NC_000074.6	40511191	40512162	57	11	1.83647	4.5032	4.70185	18983(Cnot7),52348(Vps37a)
NC_000067.6	42696570	42698255	75	22	1.20843	5.12778	3.1686	18993(Pou3f3)
NC_000081.6	100599187	100600345	50	10	1.81423	4.36654	4.28341	19009(Pou6f1)
NC_000071.6	52113252	52113888	23	3	2.4076	3.2038	3.59865	19017(Ppargc1a)
NC_000078.6	72760644	72762234	79	19	1.469	5.05643	4.27037	19042(Ppm1a)
NC_000077.6	52098475	52099719	63	6	2.72718	4.17095	7.87818	19052(Ppp2ca)
NC_000074.6	33599233	33600195	44	7	2.12985	4.06492	4.72589	19053(Ppp2cb)
NC_000069.6	136669753	136671103	83	20	1.45466	5.11965	4.49741	19055(Ppp3ca)
NC_000080.6	20545703	20546616	43	10	1.6446	4.28173	3.30472	19056(Ppp3cb),75602(1810062O18Rik)
NC_000077.6	17159077	17160016	46	7	2.17981	4.08991	4.94875	19058(Ppp3r1)
NC_000077.6	109650966	109651717	26	3	2.54293	3.27146	4.08961	19084(Prkar1a)
NC_000078.6	32060411	32061573	50	9	1.95173	4.29779	4.69059	19088(Prkar2b)
NC_000073.6	45813590	45814440	36	5	2.31998	3.74495	4.60319	19158(Cyth2)
NC_000069.6	94886375	94887056	21	3	2.30762	3.15381	3.35694	19172(Psmb4)
NC_000079.6	63562712	63563588	32	5	2.18853	3.67923	3.91086	19206(Ptch1)
NC_000079.6	66932873	66933562	23	4	2.08567	3.36476	3.05312	19210(Ptdss1),66410(Mterf3)
NC_000078.6	104751304	104752620	56	13	1.5941	4.6044	3.79547	192119(Dicer1)
NC_000077.6	97362065	97363365	51	13	1.48861	4.55166	3.2552	192157(Socs7)
NC_000077.6	119299378	119300536	39	9	1.67259	4.15822	3.2721	192170(Eif4a3)
NC_000077.6	120549235	120549922	22	1	3.3587	2.67935	5.157	192173(Mcrip1)
NC_000070.6	155563247	155564338	43	8	1.9341	4.13698	4.06282	192185(Nadk)
NC_000069.6	88949727	88951039	64	15	1.55235	4.77618	4.06657	192195(Ash1l),65111(Dap3)
NC_000071.6	112342781	112343570	27	3	2.58471	3.29236	4.33845	192232(Hps4),70118(Srrd)
NC_000071.6	31240532	31241674	55	6	2.57376	4.09424	6.89627	192292(Nrbp1),621407(Gm9970)
NC_000067.6	30949715	30950184	14	2	2.28262	2.72627	3.285	19243(Ptp4a1)
NC_000071.6	103424881	103426006	46	12	1.47937	4.44013	3.02796	19249(Ptpn13)
NC_000084.6	67724073	67724846	35	8	1.70354	4.02169	3.04994	19255(Ptpn2)
NC_000068.7	130449856	130450767	33	6	2.00044	3.80757	3.6551	19262(Ptpra)
NC_000073.6	135537509	135538376	34	6	2.03374	3.82423	3.87315	19267(Ptpre)
NC_000076.6	121475654	121476708	69	9	2.31557	4.47971	7.11821	192678(Rassf3)
NC_000078.6	116485441	116486255	35	7	1.87346	3.93673	3.43645	19276(Ptprn2)
NC_000077.6	115974736	115975358	32	4	2.45156	3.54771	4.45581	192897(Itgb4)
NC_000077.6	116004728	116005250	16	3	2.01139	3.00569	3.03428	192897(Itgb4)
NC_000084.6	36286557	36287684	57	3	3.42143	3.71072	9.33206	19290(Pura)
NC_000084.6	36280584	36281858	66	12	1.88673	4.64381	5.32351	19290(Pura)
NC_000077.6	6474864	6476381	86	9	2.56537	4.60461	9.22891	19291(Purb)
NC_000071.6	115506253	115507345	49	10	1.79147	4.35517	4.08267	19303(Pxn)
NC_000069.6	51483799	51484607	27	3	2.58471	3.29236	4.33845	19338(Rab33b)
NC_000072.6	88044567	88045400	27	3	2.58471	3.29236	4.33845	19349(Rab7)
NC_000071.6	143527242	143528445	55	6	2.57376	4.09424	6.89627	19353(Rac1)
NC_000079.6	100616624	100617180	16	3	2.01139	3.00569	3.03428	19356(Rad17),218518(Marveld2)
NC_000072.6	126939338	126939789	8	0	3.28066	1.64033	3.31133	19362(Rad51ap1)
NC_000083.6	56325876	56326655	34	6	2.03374	3.82423	3.87315	193796(Kdm4b)
NC_000083.6	87265612	87266280	41	4	2.72865	3.68625	5.93488	193813(Mcfd2)
NC_000071.6	129019533	129021108	77	8	2.59191	4.46588	8.61059	19384(Ran)
NC_000076.6	58446608	58447511	34	5	2.25613	3.71303	4.37016	19386(Ranbp2)
NC_000075.6	89981815	89982157	9	0	3.40171	1.70086	3.61236	19417(Rasgrf1)
NC_000072.6	83455632	83457288	91	14	2.04462	4.9292	7.41155	194388(Tet3)
NC_000077.6	72796036	72796863	34	8	1.67117	4.00551	3.04994	195018(Zzef1)
NC_000077.6	78511910	78512762	27	4	2.26278	3.45332	3.74275	195040(Tmem199),67811(Poldip2)
NC_000074.6	122112235	122112804	11	1	2.61119	2.3056	3.10048	195209(Zfp469)
NC_000079.6	21981304	21981840	16	3	2.01139	3.00569	3.03428	195236(Pom121l2)
NC_000080.6	73324934	73326339	60	15	1.47938	4.73969	3.70969	19645(Rb1)
NC_000073.6	122969584	122970752	44	4	2.80792	3.72589	6.4403	19647(Rbbp6),73951(4930413G21Rik)
NC_000074.6	78508449	78509202	38	7	1.96543	3.98272	3.85629	19656(Rbmxl1)
NC_000075.6	98424583	98425435	27	5	1.99975	3.58484	3.24128	19659(Rbp1)
NC_000071.6	53588864	53589800	39	9	1.67259	4.15822	3.2721	19664(Rbpj)
NC_000071.6	53590137	53591333	37	9	1.61366	4.12876	3.08023	19664(Rbpj)
NC_000071.6	124249178	124250199	40	10	1.56346	4.24116	3.11714	19679(Pitpnm2)
NC_000071.6	65335241	65335927	23	2	2.82263	2.99628	4.27364	19687(Rfc1)
NC_000072.6	142386774	142387672	30	5	2.11669	3.64331	3.6849	19691(Recql),66964(Golt1b)
NC_000085.6	5637431	5638029	27	4	2.26278	3.45332	3.74275	19697(Rela)
NC_000074.6	70352446	70353710	49	8	2.08098	4.21041	4.91805	19704(Upf1)
NC_000074.6	70331958	70332683	27	4	2.26278	3.45332	3.74275	19704(Upf1)
NC_000076.6	18055279	18056515	63	14	1.62765	4.72071	4.20641	19707(Reps1)
NC_000079.6	21179976	21180604	28	1	3.62503	2.81252	6.287	19720(Trim27)
NC_000074.6	84066568	84067594	49	6	2.44355	4.02913	5.93512	19724(Rfx1)
NC_000067.6	152766111	152767139	32	6	1.96614	3.79042	3.43979	19731(Rgl1),67771(Arpc5)
NC_000083.6	65884330	65885085	33	6	2.00044	3.80757	3.6551	19765(Ralbp1)
NC_000067.6	155416494	155417395	29	2	3.07902	3.12447	5.33258	19775(Xpr1)
NC_000073.6	38018731	38019942	49	9	1.92898	4.28642	4.4808	19777(Uri1)
NC_000071.6	34336230	34336916	18	1	3.13918	2.56959	4.74185	19822(Rnf4)
NC_000075.6	69289455	69290247	35	7	1.87346	3.93673	3.43645	19883(Rora)
NC_000070.6	132768276	132768766	20	2	2.66921	2.91957	3.75443	19891(Rpa2)
NC_000072.6	70791826	70792338	24	3	2.4545	3.22725	3.84294	19895(Rpia)
NC_000074.6	94857295	94857944	24	3	2.4545	3.22725	3.84294	20021(Polr2c)
NC_000081.6	11995244	11996170	36	8	1.73502	4.03743	3.24675	20024(Sub1)
NC_000080.6	24490534	24491253	20	3	2.25417	3.12709	3.11807	20088(Rps24)
NC_000078.6	69158730	69159020	7	0	3.14533	1.57266	3.0103	20090(Rps29)
NC_000070.6	133887246	133888300	43	9	1.7821	4.21298	3.66464	20111(Rps6ka1)
NC_000083.6	7169793	7170481	23	1	3.4076	2.7038	5.157	20112(Rps6ka2)
NC_000073.6	19282263	19283054	34	8	1.67117	4.00551	3.04994	20167(Rtn2)
NC_000079.6	55099710	55100628	31	6	1.93078	3.77274	3.43979	20184(Uimc1)
NC_000076.6	80797564	80799013	34	7	1.8411	3.92055	3.43645	20222(Sf3a2),78670(Plekhj1)
NC_000069.6	108444897	108445581	19	1	3.19812	2.59906	4.74185	20226(Sars)
NC_000085.6	5388126	5388902	21	1	3.30762	2.65381	4.87665	20227(Sart1),414115(D330050I16Rik)
NC_000071.6	121711219	121712878	68	19	1.29904	4.97145	3.27639	20239(Atxn2)
NC_000081.6	100870408	100871815	45	11	1.57014	4.37003	3.34305	20273(Scn8a)
NC_000068.7	66631485	66631935	11	1	2.61119	2.3056	3.10048	20274(Scn9a)
NC_000078.6	91848780	91849489	20	2	2.66921	2.91957	3.75443	20338(Sel1l)
NC_000075.6	107709347	107710431	41	8	1.88065	4.11025	3.8548	20350(Sema3f)
NC_000067.6	36557704	36558646	48	7	2.22769	4.11385	5.17358	20353(Sema4c)
NC_000077.6	77930496	77931642	46	5	2.59485	3.88239	6.04086	20370(Sez6)
NC_000077.6	116852836	116853654	23	2	2.82263	2.99628	4.27364	20382(Srsf2),69900(Mfsd11)
NC_000078.6	80945515	80946480	33	4	2.48586	3.56486	4.69786	20384(Srsf5)
NC_000076.6	61146126	61148050	122	35	1.11524	5.72754	3.94532	20397(Sgpl1)
NC_000073.6	126474656	126475306	17	2	2.4921	2.83101	3.7876	20399(Sh2b1)
NC_000085.6	40513274	40514086	22	4	2.03677	3.34031	3.05312	20411(Sorbs1)
NC_000069.6	89429991	89431008	40	7	2.02289	4.01145	4.28648	20416(Shc1),68911(Pygo2)
NC_000074.6	86745239	86746329	52	12	1.61741	4.50915	3.75499	20437(Siah1a),666945(Gm10638)
NC_000069.6	58691471	58692640	46	5	2.59485	3.88239	6.04086	20439(Siah2),71301(4930593A02Rik)
NC_000070.6	118134285	118135175	41	8	1.88065	4.11025	3.8548	20441(St3gal3)
NC_000072.6	142964022	142964655	17	1	3.07706	2.53853	4.4643	20449(St8sia1)
NC_000072.6	72097259	72098160	48	7	2.22769	4.11385	5.17358	20454(St3gal5)
NC_000075.6	57076235	57077313	43	9	1.7821	4.21298	3.66464	20466(Sin3a),72588(2700012I20Rik)
NC_000073.6	19094407	19095479	45	7	2.1551	4.07755	4.94875	20475(Six5)
NC_000069.6	31093994	31095882	117	15	2.23748	5.11874	9.78287	20482(Skil)
NC_000071.6	33652070	33652584	11	0	3.61119	1.8056	3.91339	20492(Slbp)
NC_000084.6	57877946	57879495	70	10	2.19437	4.55661	6.62225	20496(Slc12a2)
NC_000079.6	73763300	73764201	27	5	1.99975	3.58484	3.24128	20499(Slc12a7)
NC_000069.6	104638227	104639363	53	11	1.75437	4.46215	4.1052	20501(Slc16a1)
NC_000077.6	53891330	53891952	22	3	2.3587	3.17935	3.59865	20520(Slc22a5)
NC_000074.6	121906829	121908168	47	7	2.204	4.102	5.17358	20539(Slc7a5),407789(BC048644)
NC_000071.6	47982919	47983405	13	2	2.20335	2.68664	3.03833	20563(Slit2)
NC_000086.7	157491203	157491948	19	2	2.61315	2.89154	3.498	20603(Sms)
NC_000076.6	77605920	77606830	47	10	1.74457	4.33172	3.8843	20610(Sumo3)
NC_000069.6	90490645	90491234	11	1	2.61119	2.3056	3.10048	20615(Snapin)
NC_000075.6	122116968	122117963	36	8	1.73502	4.03743	3.24675	20623(Snrk)
NC_000075.6	122166515	122167088	13	2	2.20335	2.68664	3.03833	20623(Snrk)
NC_000084.6	10617485	10618311	24	4	2.13257	3.38821	3.28004	20641(Snrpd1)
NC_000081.6	55906190	55906846	14	2	2.28262	2.72627	3.285	20649(Sntb1)
NC_000074.6	106935408	106936525	55	14	1.47422	4.644	3.48244	20650(Sntb2)
NC_000069.6	108283703	108285004	62	9	2.19452	4.41919	6.21277	20661(Sort1)
NC_000083.6	80479351	80480879	56	14	1.49456	4.65417	3.48244	20662(Sos1)
NC_000074.6	12396042	12397673	58	15	1.44108	4.72054	3.36246	20664(Sox1),434280(Sox1ot)
NC_000068.7	152396876	152398396	70	19	1.33187	4.98786	3.43633	20667(Sox12)
NC_000086.7	60892974	60893449	15	1	2.94173	2.47087	3.91339	20675(Sox3)
NC_000077.6	107131226	107132421	44	7	2.12985	4.06492	4.72589	207165(Bptf)
NC_000079.6	33935718	33936185	16	3	2.01139	3.00569	3.03428	20719(Serpinb6a),68808(1110046J04Rik)
NC_000079.6	51100626	51101749	35	2	3.2885	3.22921	6.41235	20729(Spin1),77428(9430083A17Rik)
NC_000068.7	119237080	119238213	37	6	2.12823	3.87147	4.3168	20732(Spint1)
NC_000081.6	78718089	78719213	49	10	1.79147	4.35517	4.08267	207393(Elfn2)
NC_000068.7	29965099	29966886	70	18	1.40587	4.95086	3.70387	20740(Sptan1)
NC_000068.7	37702487	37703922	72	17	1.51579	4.92782	4.16417	20744(Strbp)
NC_000079.6	57607782	57608165	8	0	3.28066	1.64033	3.31133	20745(Spock1)
NC_000077.6	119228109	119228820	30	6	1.8943	3.75451	3.22741	207592(Tbc1d16),207607(Ccdc40)
NC_000071.6	7296089	7296582	9	0	3.40171	1.70086	3.61236	207618(Zfp804b)
NC_000073.6	127273789	127274195	13	2	2.20335	2.68664	3.03833	20768(Sephs2)
NC_000082.6	44172827	44173804	51	12	1.59553	4.4982	3.56918	207806(Usf3)
NC_000081.6	82146987	82148142	49	12	1.55046	4.47567	3.38598	20788(Srebf2)
NC_000078.6	4768717	4769455	26	3	2.54293	3.27146	4.08961	207921(Fam228b),382562(Pfn4)
NC_000083.6	46555147	46556290	68	17	1.45104	4.89545	3.81635	20807(Srf)
NC_000077.6	119913645	119914115	14	2	2.28262	2.72627	3.285	208092(Chmp6)
NC_000082.6	20140821	20141607	38	6	2.15808	3.88639	4.3168	208146(Yeats2)
NC_000071.6	23675125	23676672	76	20	1.35469	5.06966	3.82397	20817(Srpk2)
NC_000076.6	80655940	80656890	34	7	1.8411	3.92055	3.43645	208198(Btbd2)
NC_000076.6	80754797	80755995	59	14	1.5535	4.68364	3.83966	208266(Dot1l)
NC_000075.6	100642937	100644500	75	11	2.14703	4.65848	6.81337	20842(Stag1)
NC_000068.7	166995478	166996731	63	10	2.07511	4.49699	5.74704	20853(Stau1)
NC_000082.6	20672557	20673815	71	9	2.34794	4.4959	7.34802	208643(Eif4g1)
NC_000077.6	32532714	32533662	35	7	1.87346	3.93673	3.43645	20868(Stk10),69306(Efcab9)
NC_000067.6	86711512	86711905	8	0	3.28066	1.64033	3.31133	208718(Dis3l2)
NC_000067.6	92179446	92180486	48	8	2.05777	4.19881	4.701	208727(Hdac4)
NC_000078.6	71831162	71831676	13	0	3.78831	1.89415	4.51545	208846(Daam1)
NC_000071.6	123930521	123931119	14	1	2.86758	2.43379	3.91339	208908(Ccdc62)
NC_000082.6	21422757	21423621	25	5	1.9146	3.54226	3.02404	209018(Vps8)
NC_000077.6	90595634	90596038	8	0	3.28066	1.64033	3.31133	20913(Stxbp4)
NC_000077.6	90638031	90638791	19	1	3.19812	2.59906	4.74185	20913(Stxbp4),69802(Cox11)
NC_000080.6	73552589	73553405	32	4	2.45156	3.54771	4.45581	20916(Sucla2)
NC_000077.6	100319742	100320544	25	5	1.9146	3.54226	3.02404	20918(Eif1)
NC_000070.6	16013463	16014139	19	2	2.61315	2.89154	3.498	209212(Osgin2)
NC_000073.6	80026000	80026832	30	5	2.11669	3.64331	3.6849	209225(Zfp710)
NC_000073.6	80026894	80027590	23	4	2.08567	3.36476	3.05312	209225(Zfp710)
NC_000067.6	182408775	182409784	52	6	2.5105	4.0626	6.41286	209456(Trp53bp2)
NC_000076.6	45577685	45578653	47	9	1.88207	4.26296	4.2732	209462(Hace1)
NC_000073.6	110221610	110222338	23	4	2.08567	3.36476	3.05312	20947(Swap70)
NC_000085.6	38836269	38837472	49	6	2.44355	4.02913	5.93512	209478(Tbc1d12)
NC_000086.7	142680922	142681956	28	1	3.62503	2.81252	6.287	209497(Tmem164)
NC_000086.7	20920177	20921314	28	4	2.3031	3.47348	3.9781	20964(Syn1)
NC_000071.6	45856533	45857853	81	12	2.11885	4.75987	7.00917	209707(Lcorl)
NC_000076.6	127676854	127677550	23	2	2.82263	2.99628	4.27364	210035(Nemp1)
NC_000079.6	69533363	69534183	34	2	3.25613	3.21303	6.41235	210106(Tent4a)
NC_000067.6	125937004	125937512	7	0	3.14533	1.57266	3.0103	210356(Nckap5)
NC_000080.6	63543397	63544254	31	4	2.41621	3.53003	4.45581	210376(Mtmr9)
NC_000067.6	129593545	129593975	7	0	3.14533	1.57266	3.0103	210417(Thsd7b)
NC_000082.6	26105152	26106074	33	5	2.22283	3.69638	4.13933	210530(P3h2)
NC_000083.6	45544790	45545944	42	10	1.61818	4.26852	3.30472	210573(Tmem151b)
NC_000076.6	128368454	128369333	33	3	2.80779	3.4039	5.35254	210582(Coq10a)
NC_000083.6	87745704	87747054	41	10	1.59115	4.255	3.11714	210741(Kcnk12)
NC_000083.6	46857005	46858736	63	18	1.28661	4.89123	3.0532	210982(Bicral)
NC_000079.6	73467023	73467918	39	8	1.82459	4.08222	3.64935	210992(Lpcat1)
NC_000080.6	103069947	103070738	24	3	2.4545	3.22725	3.84294	211286(Cln5)
NC_000076.6	30802416	30803525	45	4	2.83317	3.73851	6.69496	211329(Ncoa7)
NC_000067.6	37864607	37865382	29	6	1.85663	3.73567	3.01816	211484(Tsga10)
NC_000076.6	67548370	67549444	33	6	2.00044	3.80757	3.6551	211488(Ado)
NC_000073.6	46033390	46034263	43	5	2.51907	3.8445	5.55481	211548(Nomo1)
NC_000069.6	127789668	127790269	11	0	3.61119	1.8056	3.91339	211550(Tifa)
NC_000075.6	96239839	96240254	12	0	3.70316	1.85158	4.21442	211586(Tfdp2)
NC_000080.6	26579407	26580060	28	4	2.3031	3.47348	3.9781	211922(Dennd6a)
NC_000071.6	20881411	20882463	51	6	2.48861	4.05166	6.17324	212090(Tmem60),68770(Phtf2)
NC_000084.6	23803838	23804342	12	1	2.70316	2.35158	3.36932	212307(Mapre2)
NC_000085.6	41482219	41483717	83	18	1.59905	5.04745	5.11121	212391(Lcor)
NC_000074.6	84686934	84688012	41	9	1.72865	4.18625	3.46696	212528(Trmt1),66830(Nacc1)
NC_000078.6	111485117	111486345	48	12	1.52725	4.46407	3.20553	212539(Gm266)
NC_000079.6	55634849	55635644	26	5	1.95796	3.56394	3.02404	212880(Ddx46)
NC_000082.6	45742725	45743142	15	2	2.35677	2.76335	3.285	213012(Abhd10)
NC_000074.6	4166488	4167052	23	2	2.82263	2.99628	4.27364	213027(Evi5l),78899(4932443L11Rik)
NC_000080.6	70350959	70351815	35	5	2.2885	3.72921	4.37016	213053(Slc39a14)
NC_000067.6	58585739	58586560	19	2	2.61315	2.89154	3.498	213056(Fam126b),66495(Ndufb3)
NC_000067.6	30872932	30874258	67	13	1.79684	4.70577	5.13748	213109(Phf3)
NC_000067.6	132298576	132299375	35	8	1.70354	4.02169	3.04994	213417(Klhdc8a)
NC_000070.6	132211218	132212620	64	13	1.745	4.67985	4.74362	213541(Ythdf2)
NC_000072.6	91683850	91684686	28	5	2.04007	3.605	3.46164	21366(Slc6a6)
NC_000086.7	77510610	77511282	19	1	3.19812	2.59906	4.74185	21372(Tbl1x)
NC_000068.7	112492630	112493628	46	11	1.59485	4.38239	3.34305	213788(Chrm5),74268(Aven)
NC_000072.6	4600456	4601816	51	12	1.59553	4.4982	3.56918	213819(Casd1)
NC_000075.6	44767235	44767919	39	1	3.99452	2.99726	8.28886	213827(Arcn1)
NC_000071.6	24387802	24388402	16	3	2.01139	3.00569	3.03428	213948(Atg9b)
NC_000075.6	72111018	72112275	51	10	1.83654	4.3777	4.28341	21406(Tcf12)
NC_000084.6	69345949	69346951	39	9	1.67259	4.15822	3.2721	21413(Tcf4)
NC_000076.6	80433034	80433862	44	8	1.95992	4.14989	4.27328	21423(Tcf3)
NC_000083.6	47736738	47738794	98	29	1.12887	5.47133	3.51458	21425(Tfeb)
NC_000077.6	102316586	102318599	103	25	1.39193	5.39641	4.78701	21429(Ubtf)
NC_000079.6	59822582	59823429	24	4	2.13257	3.38821	3.28004	214290(Tut7)
NC_000078.6	108306014	108306925	26	4	2.221	3.43243	3.51	214305(Hhipl1)
NC_000075.6	77544433	77545223	28	6	1.81768	3.71619	3.01816	214345(Lrrc1)
NC_000075.6	65214700	65215495	29	6	1.85663	3.73567	3.01816	214424(Parp16)
NC_000067.6	34842559	34843221	33	5	2.22283	3.69638	4.13933	214469(Fam168b)
NC_000083.6	12916371	12917097	14	2	2.28262	2.72627	3.285	21454(Tcp1),67681(Mrpl18)
NC_000068.7	122117927	122118451	14	0	3.86758	1.93379	4.81648	214585(Spg11)
NC_000074.6	88198913	88200719	87	20	1.50811	5.14637	4.84591	214627(Tent4b)
NC_000067.6	36307536	36308054	15	2	2.35677	2.76335	3.285	214855(Arid5a)
NC_000074.6	106892780	106893941	64	12	1.85191	4.6264	5.12031	214987(Chtf8),21771(Utp4)
NC_000067.6	156718169	156719386	51	8	2.12604	4.23295	5.13708	215015(Fam20b)
NC_000076.6	53014530	53014872	7	0	3.14533	1.57266	3.0103	215085(Slc35f1)
NC_000077.6	55204136	55204574	14	0	3.86758	1.93379	4.81648	215335(Slc36a1)
NC_000077.6	55232572	55233234	13	1	2.78831	2.39415	3.64039	215335(Slc36a1)
NC_000083.6	26068920	26069831	37	6	2.12823	3.87147	4.3168	215445(Rab11fip3)
NC_000076.6	117845160	117846481	68	14	1.71408	4.76393	4.77287	215449(Rap1b)
NC_000075.6	121704474	121705090	31	7	1.73813	3.86907	3.02827	215474(Sec22c)
NC_000077.6	95336638	95337503	34	5	2.25613	3.71303	4.37016	215512(Fam117a)
NC_000076.6	7780317	7781312	38	5	2.38047	3.7752	4.83828	215751(Ginm1)
NC_000072.6	41194791	41195450	16	3	2.01139	3.00569	3.03428	21577(Tcrb)
NC_000076.6	62725357	62726453	37	8	1.76566	4.05276	3.44661	216021(Stox1)
NC_000076.6	79908253	79909093	32	5	2.18853	3.67923	3.91086	216154(Med16)
NC_000076.6	80102135	80102954	24	4	2.13257	3.38821	3.28004	216161(Sbno2)
NC_000076.6	80589800	80590553	30	4	2.37973	3.51179	4.21584	216169(Abhd17a)
NC_000076.6	95416268	95417151	35	7	1.87346	3.93673	3.43645	216233(Socs2)
NC_000076.6	105840825	105841609	28	4	2.3031	3.47348	3.9781	216292(Mettl25),52713(Ccdc59)
NC_000076.6	116949631	116950857	43	4	2.7821	3.71298	6.18692	216363(Rab3ip),71086(4933412E12Rik)
NC_000076.6	127311455	127311970	16	2	2.42642	2.79817	3.53488	216443(Mars)
NC_000076.6	128498609	128499148	26	3	2.54293	3.27146	4.08961	216459(Myl6b)
NC_000077.6	3331905	3332650	29	5	2.07902	3.62447	3.46164	216505(Pik3ip1)
NC_000083.6	26932643	26933777	31	6	1.93078	3.77274	3.43979	21652(Phf1)
NC_000077.6	6546559	6547528	61	7	2.49806	4.24903	7.03267	216527(Ccm2)
NC_000077.6	20248777	20249717	36	6	2.09759	3.85615	4.09376	216543(Cep68)
NC_000076.6	111505968	111506946	47	7	2.204	4.102	5.17358	21664(Phlda1)
NC_000076.6	82629719	82630337	16	3	2.01139	3.00569	3.03428	21665(Tdg)
NC_000077.6	57518223	57518906	32	6	1.96614	3.79042	3.43979	216760(Mfap3),67726(Fam114a2)
NC_000077.6	59306504	59307505	35	5	2.2885	3.72921	4.37016	216795(Wnt9a)
NC_000077.6	120597719	120599008	59	16	1.37292	4.77392	3.25159	21681(Alyref),66156(Anapc11)
NC_000071.6	72868363	72868847	14	2	2.28262	2.72627	3.285	21682(Tec)
NC_000077.6	60878284	60879078	39	5	2.40956	3.78974	5.07533	216821(Tmem11)
NC_000077.6	65162158	65163156	33	7	1.80779	3.9039	3.23081	216831(Arhgap44)
NC_000077.6	69368310	69369529	46	10	1.72038	4.31962	3.68844	216848(Chd3)
NC_000081.6	81810727	81812033	53	6	2.53198	4.07334	6.41286	21685(Tef)
NC_000077.6	77513081	77513780	34	3	2.8411	3.42055	5.6101	216964(Trp53i13)
NC_000077.6	83964105	83964763	32	2	3.18853	3.17923	5.87024	217030(Synrg)
NC_000077.6	94676772	94677775	47	8	2.03408	4.18696	4.701	217119(Xylt2)
NC_000077.6	101424956	101425609	20	1	3.25417	2.62709	4.59735	217201(Rundc1),73635(Ptges3l)
NC_000077.6	116108837	116110745	66	19	1.26524	4.95455	3.11893	217333(Trim47)
NC_000077.6	117653936	117655576	52	10	1.85842	4.38864	4.48643	217351(Tnrc6c)
NC_000077.6	120437015	120437929	47	11	1.61904	4.39448	3.52967	217365(Nploc4)
NC_000078.6	15816729	15817167	13	0	3.78831	1.89415	4.51545	217410(Trib2),432636(Gm5432)
NC_000078.6	45030949	45031339	8	0	3.28066	1.64033	3.31133	217517(Stxbp6)
NC_000078.6	54984809	54986471	62	14	1.60955	4.71167	4.20641	217578(Baz1a)
NC_000075.6	90113602	90114368	22	4	2.03677	3.34031	3.05312	21761(Morf4l1)
NC_000072.6	83775513	83775999	11	1	2.61119	2.3056	3.10048	21766(Tex261)
NC_000078.6	69183756	69184890	53	7	2.33933	4.16967	5.85893	217664(Mgat2),66483(Rpl36al)
NC_000078.6	80790076	80791241	55	10	1.92168	4.42027	4.89889	217684(Susd6)
NC_000078.6	102282908	102283564	30	5	2.11669	3.64331	3.6849	217835(Rin3)
NC_000078.6	111038562	111040453	69	19	1.31557	4.97971	3.43633	217864(Rcor1)
NC_000082.6	56716706	56717784	46	7	2.17981	4.08991	4.94875	21787(Tfg)
NC_000078.6	112721816	112722956	45	12	1.45466	4.42777	3.02796	217882(Cep170b)
NC_000078.6	116262697	116263398	21	2	2.72266	2.94629	4.01305	217935(Wdr60)
NC_000078.6	117533577	117534543	34	7	1.8411	3.92055	3.43645	217944(Rapgef5)
NC_000080.6	76414158	76415802	67	15	1.60419	4.8021	4.43241	21807(Tsc22d1)
NC_000067.6	186705085	186705786	25	3	2.49956	3.24978	4.08961	21808(Tgfb2)
NC_000079.6	32338263	32338982	23	4	2.08567	3.36476	3.05312	218138(Gmds)
NC_000079.6	45389409	45390267	27	5	1.99975	3.58484	3.24128	218203(Mylip)
NC_000080.6	57423918	57424532	25	4	2.17764	3.41075	3.51	21821(Ift88)
NC_000079.6	47043080	47044099	46	5	2.59485	3.88239	6.04086	218214(Kdm1b),22017(Tpmt)
NC_000079.6	48967459	48968851	48	6	2.42034	4.01752	5.69855	218236(Fam120a),68128(Fam120aos)
NC_000079.6	94173580	94174352	24	4	2.13257	3.38821	3.28004	218454(Lhfpl2)
NC_000072.6	37870398	37871792	66	15	1.58717	4.79359	4.24841	21848(Trim24)
NC_000079.6	103773972	103774996	28	4	2.3031	3.47348	3.9781	218543(Srek1)
NC_000079.6	108316091	108316734	20	1	3.25417	2.62709	4.59735	218581(Depdc1b)
NC_000079.6	113794100	113795093	22	3	2.3587	3.17935	3.59865	218639(Arl15)
NC_000080.6	8098021	8098728	28	2	3.04007	3.105	5.33258	218699(Pxk)
NC_000071.6	124628904	124629481	29	0	4.66398	2.33199	NA	21871(Atp6v0a2)
NC_000080.6	14702606	14703763	35	7	1.87346	3.93673	3.43645	218756(Slc4a7)
NC_000080.6	18893292	18894074	41	9	1.72865	4.18625	3.46696	218793(Ube2e2)
NC_000080.6	30548784	30549753	28	5	2.04007	3.605	3.46164	21881(Tkt)
NC_000070.6	72199612	72201314	61	12	1.79762	4.59925	4.71961	21885(Tle1),68285(C630043F03Rik)
NC_000080.6	34673688	34674687	56	13	1.5941	4.6044	3.79547	218914(Wapl)
NC_000074.6	64205502	64206050	15	2	2.35677	2.76335	3.285	21892(Tll1)
NC_000080.6	50930470	50931197	26	2	2.95796	3.06394	4.80008	219024(Pip4p1)
NC_000080.6	54553888	54554640	25	4	2.17764	3.41075	3.51	219072(Haus4)
NC_000080.6	59625977	59626552	19	2	2.61315	2.89154	3.498	219134(Shisa2)
NC_000076.6	91170642	91172052	58	9	2.11915	4.3815	5.54974	21917(Tmpo)
NC_000080.6	78536352	78537154	20	0	4.25417	2.12709	6.0206	219181(Akap11)
NC_000080.6	87415825	87417401	57	7	2.42143	4.21072	6.55886	219249(Tdrd3)
NC_000067.6	171329282	171330120	55	15	1.38112	4.69056	3.19271	21945(Dedd)
NC_000074.6	75033506	75033999	11	1	2.61119	2.3056	3.10048	21968(Tom1)
NC_000075.6	85843529	85844486	29	5	2.07902	3.62447	3.46164	21983(Tpbg),442799(9330154J02Rik)
NC_000069.6	9003910	9004783	39	7	1.99452	3.99726	4.07017	21985(Tpd52)
NC_000076.6	94147754	94148423	22	2	2.77374	2.97183	4.27364	22025(Nr2c1)
NC_000068.7	25546451	25547152	27	5	1.99975	3.58484	3.24128	22030(Traf2)
NC_000077.6	78165032	78165798	25	3	2.49956	3.24978	4.08961	22032(Traf4)
NC_000082.6	32608655	32609563	36	6	2.09759	3.85615	4.09376	22042(Tfrc)
NC_000077.6	94210917	94212157	88	10	2.45398	4.68642	8.90534	22057(Tob1)
NC_000073.6	45128295	45129021	27	5	1.99975	3.58484	3.24128	22121(Rpl13a)
NC_000068.7	119799158	119800390	57	16	1.33397	4.75445	3.08659	22174(Tyro3)
NC_000086.7	163958110	163958517	9	0	3.40171	1.70086	3.61236	22184(Zrsr2)
NC_000073.6	5061975	5062667	28	4	2.3031	3.47348	3.9781	22185(U2af2)
NC_000077.6	62551481	62551859	11	0	3.61119	1.8056	3.91339	22187(Ubb)
NC_000068.7	78868517	78869907	55	9	2.05919	4.35152	5.33213	22193(Ube2e3)
NC_000080.6	18331058	18332149	49	11	1.66594	4.41793	3.71899	22194(Ube2e1)
NC_000083.6	25273085	25273674	21	1	3.30762	2.65381	4.87665	22196(Ube2i)
NC_000076.6	77622141	77622880	30	2	3.11669	3.14331	5.60081	22213(Ube2g2)
NC_000073.6	59228990	59229642	32	7	1.77349	3.88675	3.02827	22215(Ube3a)
NC_000067.6	59670192	59670823	41	6	2.24322	3.92897	4.76955	22218(Sumo1)
NC_000075.6	113930844	113931995	41	7	2.05058	4.02529	4.28648	22221(Ubp1)
NC_000074.6	119910586	119911498	38	9	1.6435	4.14368	3.08023	22224(Usp10)
NC_000071.6	65435380	65436157	30	5	2.11669	3.64331	3.6849	22235(Ugdh)
NC_000071.6	110809590	110810221	26	5	1.95796	3.56394	3.02404	22241(Ulk1)
NC_000068.7	32259598	32260305	25	5	1.9146	3.54226	3.02404	22245(Uck1)
NC_000073.6	30955555	30957780	104	21	1.64394	5.2814	6.1591	22282(Usf2),54135(Lsr)
NC_000076.6	60686567	60687592	34	8	1.67117	4.00551	3.04994	22295(Cdh23)
NC_000068.7	27426129	27427382	63	15	1.53454	4.76727	3.88697	22325(Vav2)
NC_000080.6	121378465	121379731	54	12	1.65997	4.53043	3.94331	223255(Stk24)
NC_000077.6	52360761	52361831	42	7	2.07761	4.03881	4.50509	22333(Vdac1)
NC_000081.6	34678207	34679051	25	4	2.17764	3.41075	3.51	223473(Nipal2),71637(4930413F20Rik)
NC_000075.6	121642513	121643302	23	4	2.08567	3.36476	3.05312	22354(Vipr1)
NC_000081.6	74721022	74721898	24	1	3.4545	2.72725	5.43828	223626(Them6)
NC_000081.6	75766211	75766559	7	0	3.14533	1.57266	3.0103	223642(Zc3h3)
NC_000081.6	75981492	75982069	16	3	2.01139	3.00569	3.03428	223648(Ccdc166)
NC_000081.6	76710240	76710963	28	6	1.81768	3.71619	3.01816	223664(Lrrc14),79456(Recql4)
NC_000081.6	83555277	83556046	24	4	2.13257	3.38821	3.28004	223722(Mcat)
NC_000078.6	108893657	108894163	12	1	2.70316	2.35158	3.36932	22375(Wars)
NC_000081.6	88751268	88752300	38	9	1.6435	4.14368	3.08023	223773(Zbed4)
NC_000081.6	88819296	88820001	25	4	2.17764	3.41075	3.51	223774(Alg12),76737(Creld2)
NC_000081.6	99369795	99371055	77	8	2.59191	4.46588	8.61059	22379(Fmnl3)
NC_000081.6	93274789	93275753	52	9	1.99593	4.31989	4.90247	223827(Gxylt1)
NC_000081.6	93397678	93398708	35	6	2.06611	3.84041	3.87315	223828(Pphln1),67197(Zcrb1)
NC_000071.6	134638611	134639692	45	12	1.45466	4.42777	3.02796	22384(Eif4h)
NC_000071.6	38561171	38561936	44	6	2.32249	3.9686	5.23041	22388(Wdr1)
NC_000081.6	102135795	102136466	25	5	1.9146	3.54226	3.02404	223918(Spryd3)
NC_000082.6	16146481	16147153	16	0	4.01139	2.00569	5.11751	224008(Spidr)
NC_000083.6	32363974	32364761	21	3	2.30762	3.15381	3.35694	22404(Wiz)
NC_000082.6	30387971	30389157	53	8	2.16941	4.25463	5.35801	224088(Atp13a3)
NC_000081.6	98776229	98776774	20	3	2.25417	3.12709	3.11807	22410(Wnt10b)
NC_000082.6	32078725	32079567	39	6	2.18716	3.90094	4.5421	224105(Pak2)
NC_000072.6	119543666	119544692	49	6	2.44355	4.02913	5.93512	22419(Wnt5b)
NC_000085.6	44511489	44512263	23	4	2.08567	3.36476	3.05312	22423(Wnt8b)
NC_000074.6	33385283	33386476	52	10	1.85842	4.38864	4.48643	22427(Wrn),75029(Purg)
NC_000083.6	5492369	5493719	52	8	2.14793	4.24389	5.35801	224454(Zdhhc14)
NC_000083.6	25918915	25920060	55	7	2.38112	4.19056	6.32405	224624(Rab40c)
NC_000083.6	30575697	30576547	34	6	2.03374	3.82423	3.87315	224671(Btbd9)
NC_000083.6	45685477	45686665	41	9	1.72865	4.18625	3.46696	224807(Tmem63b),68463(Mrpl14)
NC_000083.6	46711322	46712072	24	3	2.4545	3.22725	3.84294	224824(Pex6)
NC_000083.6	47672231	47673144	30	6	1.8943	3.75451	3.22741	224836(Usp49)
NC_000083.6	50508670	50510103	55	13	1.57376	4.59424	3.79547	224860(Plcl2)
NC_000083.6	56584145	56585572	46	12	1.47937	4.44013	3.02796	224902(Safb2),224903(Safb)
NC_000083.6	64331135	64332328	42	9	1.75569	4.19977	3.66464	224938(Pja2)
NC_000083.6	73107938	73108470	15	2	2.35677	2.76335	3.285	225010(Lclat1)
NC_000083.6	80206100	80207429	41	6	2.24322	3.92897	4.76955	225027(Srsf7)
NC_000083.6	83630976	83632579	62	15	1.51644	4.75822	3.88697	225030(Kcng3)
NC_000083.6	87282295	87283387	41	5	2.46562	3.81777	5.3142	225049(Ttc7),74597(4833418N02Rik)
NC_000084.6	4920235	4920736	16	2	2.42642	2.79817	3.53488	225115(Svil)
NC_000084.6	13972176	13973030	30	4	2.37973	3.51179	4.21584	225207(Zfp521)
NC_000084.6	24529794	24530487	19	1	3.19812	2.59906	4.74185	225283(Rprd1a)
NC_000084.6	24734178	24734778	13	1	2.78831	2.39415	3.64039	225288(Fhod3)
NC_000084.6	25168327	25169418	46	9	1.85788	4.25087	4.06789	225289(AW554918),66648(Tpgs2)
NC_000084.6	34931184	34932220	36	4	2.58302	3.61344	5.18764	225363(Etf1)
NC_000084.6	42275282	42276008	24	3	2.4545	3.22725	3.84294	225432(Rbm27)
NC_000084.6	84087359	84088600	63	18	1.28661	4.89123	3.0532	225791(Zadh2)
NC_000085.6	4396522	4398166	72	11	2.10075	4.63534	6.378	225876(Kdm2a)
NC_000085.6	3767442	3769196	81	11	2.23433	4.70213	7.47688	225888(Kmt5b)
NC_000070.6	46195707	46196316	21	2	2.72266	2.94629	4.01305	22590(Xpa)
NC_000085.6	18712763	18714328	40	9	1.70096	4.17241	3.46696	225995(D030056L22Rik)
NC_000085.6	21652958	21654011	38	8	1.79551	4.06768	3.44661	226016(Abhd17b)
NC_000085.6	28679408	28680318	29	6	1.85663	3.73567	3.01816	226075(Glis3),320176(D930032P07Rik)
NC_000085.6	36554203	36555313	41	9	1.72865	4.18625	3.46696	226098(Hectd2)
NC_000071.6	32610831	32611632	38	7	1.96543	3.98272	3.85629	22612(Yes1)
NC_000085.6	46056433	46057407	39	8	1.82459	4.08222	3.64935	226169(Pprc1)
NC_000085.6	57360637	57361867	68	8	2.45104	4.39545	7.4192	226252(Fam160b1),320879(B230217O12Rik)
NC_000071.6	33018535	33019496	43	4	2.7821	3.71298	6.18692	22629(Ywhah)
NC_000081.6	36792487	36794370	86	16	1.79984	4.98738	5.99487	22631(Ywhaz)
NC_000067.6	120340466	120341211	24	4	2.13257	3.38821	3.28004	226359(C1ql2)
NC_000074.6	111643423	111644274	23	1	3.4076	2.7038	5.157	22640(Zfp1)
NC_000067.6	128416747	128417325	16	1	3.01139	2.50569	4.18809	226414(Dars)
NC_000067.6	135430151	135430706	16	3	2.01139	3.00569	3.03428	226432(Ipo9)
NC_000067.6	139421960	139422676	19	2	2.61315	2.89154	3.498	226470(Zbtb41)
NC_000067.6	161876272	161877058	39	4	2.67259	3.65822	5.68426	226551(Suco)
NC_000077.6	97700035	97700768	25	5	1.9146	3.54226	3.02404	22658(Pcgf2)
NC_000067.6	165663240	165663916	18	2	2.55422	2.86207	3.498	226594(Rcsd1)
NC_000067.6	186117048	186117543	12	1	2.70316	2.35158	3.36932	226791(Lyplal1)
NC_000067.6	192770401	192771391	46	11	1.59485	4.38239	3.34305	226861(Hhat)
NC_000067.6	21961038	21962045	46	6	2.37246	3.99358	5.46362	226922(Kcnq5)
NC_000067.6	34801710	34802195	11	1	2.61119	2.3056	3.10048	226970(Arhgef4)
NC_000067.6	36368523	36369377	56	9	2.07952	4.36169	5.33213	226976(Kansl3)
NC_000081.6	75616145	75617058	21	2	2.72266	2.94629	4.01305	22701(Zfp41)
NC_000067.6	46852797	46853835	49	12	1.55046	4.47567	3.38598	227059(Slc39a10)
NC_000067.6	52630329	52631149	30	5	2.11669	3.64331	3.6849	227094(Nemp2)
NC_000067.6	58973254	58973860	15	2	2.35677	2.76335	3.285	227154(Stradb),70827(Trak2)
NC_000077.6	49203129	49203683	12	1	2.70316	2.35158	3.36932	22720(Zfp62)
NC_000067.6	74391277	74392396	58	9	2.11915	4.3815	5.54974	227292(Ctdsp1)
NC_000067.6	87326622	87327693	48	10	1.76826	4.34356	3.8843	227331(Gigyf2)
NC_000067.6	87962589	87963155	11	0	3.61119	1.8056	3.91339	227334(Usp40)
NC_000067.6	93511763	93512487	30	4	2.37973	3.51179	4.21584	227377(Farp2)
NC_000067.6	105707481	105707922	8	0	3.28066	1.64033	3.31133	227446(Relch)
NC_000067.6	105664208	105664694	13	2	2.20335	2.68664	3.03833	227446(Relch)
NC_000067.6	105990193	105991817	68	12	1.92053	4.6607	5.52852	227449(Zcchc2),635504(Gm7160)
NC_000079.6	67754894	67755375	12	1	2.70316	2.35158	3.36932	22746(Zfp85),68271(Zfp85os)
NC_000068.7	3332312	3332774	14	1	2.86758	2.43379	3.91339	227522(Rpp38)
NC_000068.7	6100058	6100889	23	1	3.4076	2.7038	5.157	227545(Proser2)
NC_000068.7	25255175	25255913	24	4	2.13257	3.38821	3.28004	227615(Tmem203),78797(Ndor1)
NC_000068.7	25365127	25365686	13	2	2.20335	2.68664	3.03833	227620(Uap1l1)
NC_000086.7	94122469	94123603	39	5	2.40956	3.78974	5.07533	22764(Zfx)
NC_000068.7	28840546	28840966	16	0	4.01139	2.00569	5.11751	227674(Ddx31)
NC_000068.7	28839978	28840539	13	2	2.20335	2.68664	3.03833	227674(Ddx31),269252(Gtf3c4)
NC_000068.7	30124121	30124616	12	0	3.70316	1.85158	4.21442	227693(Zer1)
NC_000081.6	58075774	58076976	40	3	3.02289	3.51145	6.65354	22770(Zhx1)
NC_000068.7	32450709	32451574	35	8	1.70354	4.02169	3.04994	227731(Slc25a25),71254(Naif1)
NC_000068.7	38286820	38287679	32	7	1.77349	3.88675	3.02827	227801(Dennd1a)
NC_000068.7	44926694	44927745	55	3	3.38112	3.69056	9.06065	227835(Gtdc1)
NC_000068.7	49450962	49452418	76	9	2.42508	4.53447	8.04491	227867(Epc2)
NC_000072.6	42349693	42350616	25	3	2.49956	3.24978	4.08961	22793(Zyx)
NC_000068.7	69722658	69723427	27	2	2.99975	3.08484	5.06563	228005(Ppig)
NC_000068.7	70824681	70826087	68	17	1.45104	4.89545	3.81635	228012(Tlk1)
NC_000068.7	71873166	71873954	27	3	2.58471	3.29236	4.33845	228026(Pdk1)
NC_000068.7	73910735	73911586	29	6	1.85663	3.73567	3.01816	228033(Atp5g3)
NC_000068.7	85047769	85048819	45	12	1.45466	4.42777	3.02796	228140(Tnks1bp1)
NC_000068.7	119742128	119743124	50	12	1.57322	4.48705	3.56918	228550(Itpka)
NC_000068.7	138256289	138257106	30	6	1.8943	3.75451	3.22741	228662(Btbd3)
NC_000068.7	153071634	153072368	31	6	1.93078	3.77274	3.43979	228788(Ccm2l)
NC_000068.7	154612916	154614001	42	9	1.75569	4.19977	3.66464	228807(Zfp341)
NC_000068.7	156196379	156197430	55	11	1.79615	4.48304	4.50079	228829(Phf20)
NC_000068.7	158667037	158667990	36	7	1.90494	3.95247	3.645	228852(Ppp1r16b)
NC_000068.7	163472310	163472854	17	1	3.07706	2.53853	4.4643	228859(Fitm2),69517(2310001K24Rik)
NC_000068.7	170130301	170131787	67	12	1.90375	4.65232	5.52852	228913(Zfp217)
NC_000068.7	174110119	174110939	30	5	2.11669	3.64331	3.6849	228961(Npepl1)
NC_000068.7	178413646	178414986	54	12	1.65997	4.53043	3.94331	228966(Ppp1r3d),71532(Fam217b)
NC_000068.7	179975054	179977257	95	13	2.19305	4.90388	8.29734	228980(Taf4),66730(4921531C22Rik)
NC_000068.7	180118932	180120062	40	8	1.85297	4.09641	3.8548	228983(Osbpl2)
NC_000068.7	180920477	180921316	26	4	2.221	3.43243	3.51	228994(Ythdf1)
NC_000068.7	181287376	181288164	30	3	2.70166	3.35083	4.84203	229004(Gmeb2)
NC_000069.6	9250150	9251810	64	16	1.46489	4.81991	3.76198	229055(Zbtb10)
NC_000069.6	84480020	84480793	33	7	1.80779	3.9039	3.23081	229474(Fhdc1)
NC_000069.6	90265007	90266158	61	16	1.4106	4.79276	3.41922	229541(Dennd4b)
NC_000069.6	94837612	94838450	26	4	2.221	3.43243	3.51	229584(Pogz)
NC_000069.6	107517329	107518210	26	4	2.221	3.43243	3.51	229706(Slc6a17)
NC_000069.6	108653576	108654360	32	7	1.77349	3.88675	3.02827	229725(Clcc1)
NC_000069.6	116423255	116423865	15	2	2.35677	2.76335	3.285	229776(Cdc14a)
NC_000069.6	139074243	139075611	54	13	1.55306	4.58388	3.61279	229877(Rap1gds1)
NC_000070.6	21678336	21679912	62	14	1.60955	4.71167	4.20641	230025(Prdm13)
NC_000070.6	42916827	42917637	26	3	2.54293	3.27146	4.08961	230085(Phf24)
NC_000070.6	43578623	43579112	15	2	2.35677	2.76335	3.285	230101(Gba2),242406(Rgp1)
NC_000070.6	45408117	45409129	43	9	1.7821	4.21298	3.66464	230125(Slc25a51)
NC_000070.6	45529565	45531379	83	14	1.94009	4.87694	6.57187	230126(Shb)
NC_000070.6	59548487	59549675	75	16	1.64453	4.90973	4.84405	230257(Ptbp3)
NC_000070.6	59625918	59626826	60	10	2.01995	4.4694	5.53229	230259(E130308A19Rik)
NC_000070.6	63558292	63559282	38	3	2.96543	3.48272	6.12934	230279(Tmem268)
NC_000070.6	98923576	98924456	46	9	1.85788	4.25087	4.06789	230484(Usp1)
NC_000070.6	108459085	108460474	63	13	1.72718	4.67095	4.54965	230594(Tut4)
NC_000070.6	115737519	115738178	16	3	2.01139	3.00569	3.03428	230648(Efcab14)
NC_000070.6	119539238	119540469	69	12	1.93706	4.66897	5.73528	230700(Foxj3)
NC_000070.6	124850119	124851568	72	9	2.36379	4.50382	7.34802	230734(Yrdc),68920(1110065P20Rik)
NC_000070.6	132921908	132922936	40	6	2.21554	3.91512	4.76955	230789(Fam76a)
NC_000070.6	134286623	134287880	46	8	2.00989	4.17487	4.48604	230809(Pdik1l)
NC_000070.6	139352048	139352681	18	2	2.55422	2.86207	3.498	230866(Emc1),69902(Mrto4)
NC_000070.6	140050821	140051365	13	2	2.20335	2.68664	3.03833	230868(Igsf21)
NC_000070.6	141059986	141060753	29	5	2.07902	3.62447	3.46164	230872(Crocc)
NC_000070.6	156234427	156235215	24	4	2.13257	3.38821	3.28004	231003(Klhl17)
NC_000071.6	24526065	24527348	62	16	1.42898	4.80195	3.58938	231044(Gbx1)
NC_000071.6	25497528	25500007	111	24	1.53366	5.41069	5.75488	231051(Kmt2c),320965(4831440E17Rik)
NC_000071.6	34369478	34370771	46	7	2.17981	4.08991	4.94875	231128(Fam193a)
NC_000071.6	43232658	43235508	133	31	1.38358	5.69179	5.64699	231207(Cpeb2),665934(Gm7854)
NC_000071.6	44225872	44227107	41	9	1.72865	4.18625	3.46696	231225(Tapt1)
NC_000071.6	76951452	76951936	18	1	3.13918	2.56959	4.74185	231327(Ppat),67054(Paics)
NC_000071.6	88675038	88676381	63	13	1.72718	4.67095	4.54965	231413(Grsf1)
NC_000071.6	96161030	96162899	120	24	1.62247	5.45509	6.65346	231464(Cnot6l)
NC_000071.6	105731921	105732542	25	4	2.17764	3.41075	3.51	231549(Lrrc8d)
NC_000071.6	108629235	108630160	27	3	2.58471	3.29236	4.33845	231580(Gak),72392(Tmem175)
NC_000071.6	110342702	110343157	10	0	3.51122	1.75561	3.61236	231602(P2rx2)
NC_000071.6	113735550	113736309	21	1	3.30762	2.65381	4.87665	231630(Ficd)
NC_000071.6	115565069	115565805	36	6	2.09759	3.85615	4.09376	231659(Gcn1l1)
NC_000071.6	117976549	117977462	40	5	2.43793	3.80393	5.3142	231670(Fbxo21)
NC_000071.6	121848748	121849404	21	2	2.72266	2.94629	4.01305	231717(Pheta1)
NC_000071.6	122354089	122354962	34	4	2.51917	3.58151	4.94184	231724(Rad9b),56433(Vps29)
NC_000071.6	138263295	138264151	25	4	2.17764	3.41075	3.51	231807(BC037034),69004(6330418K02Rik)
NC_000071.6	142463945	142464413	16	0	4.01139	2.00569	5.11751	231855(Ap5z1)
NC_000071.6	142817179	142817853	34	6	2.03374	3.82423	3.87315	231861(Tnrc18)
NC_000072.6	53067665	53069064	74	12	2.01633	4.70861	6.36541	231986(Jazf1)
NC_000072.6	53287783	53288490	15	2	2.35677	2.76335	3.285	231991(Creb5)
NC_000072.6	57824550	57825492	30	6	1.8943	3.75451	3.22741	232023(Vopp1)
NC_000072.6	83831227	83831825	20	3	2.25417	3.12709	3.11807	232164(Paip2b)
NC_000072.6	90987615	90989181	65	13	1.76254	4.68862	4.93958	232227(Iqsec1)
NC_000072.6	97380603	97380992	13	1	2.78831	2.39415	3.64039	232288(Frmd4b)
NC_000072.6	100704468	100705226	35	4	2.55154	3.5977	4.94184	232313(Gxylt2)
NC_000072.6	100833416	100834368	34	6	2.03374	3.82423	3.87315	232314(Ppp4r2)
NC_000072.6	117840888	117841724	30	4	2.37973	3.51179	4.21584	232337(Zfp637)
NC_000072.6	120037679	120039069	67	6	2.79684	4.20577	8.62625	232341(Wnk1)
NC_000072.6	146724736	146725179	16	2	2.42642	2.79817	3.53488	232533(Stk38l)
NC_000072.6	148895597	148896386	31	6	1.93078	3.77274	3.43979	232560(Caprin2)
NC_000072.6	29693871	29694566	28	3	2.62503	3.31252	4.58931	232670(Tspan33)
NC_000073.6	4914971	4915671	28	5	2.04007	3.605	3.46164	232816(Zfp628)
NC_000073.6	19561708	19562375	20	3	2.25417	3.12709	3.11807	232947(Ppp1r37)
NC_000073.6	30121570	30122309	25	3	2.49956	3.24978	4.08961	233060(Zfp382)
NC_000073.6	30534428	30535486	45	10	1.69567	4.30727	3.68844	233071(Arhgap33)
NC_000073.6	35753871	35754771	26	2	2.95796	3.06394	4.80008	233115(Dpy19l3)
NC_000073.6	56019274	56019817	17	2	2.4921	2.83101	3.7876	233280(Nipa1)
NC_000073.6	66344710	66345226	13	1	2.78831	2.39415	3.64039	233328(Lrrk1)
NC_000073.6	66839916	66840821	32	6	1.96614	3.79042	3.43979	233332(Adamts17)
NC_000073.6	90129826	90130817	63	9	2.21261	4.42823	6.21277	233489(Picalm),78329(2310010J17Rik)
NC_000073.6	99381286	99381835	24	3	2.4545	3.22725	3.84294	233552(Gdpd5)
NC_000073.6	100948895	100949480	14	2	2.28262	2.72627	3.285	233571(P2ry6)
NC_000073.6	102209778	102210506	33	4	2.48586	3.56486	4.69786	233575(Pgap2),269966(Nup98)
NC_000073.6	117380565	117381685	56	11	1.81649	4.49321	4.50079	233781(Xylt1)
NC_000073.6	118242814	118244029	51	10	1.83654	4.3777	4.28341	233789(Smg1),67745(4930583K01Rik)
NC_000073.6	119895403	119895918	20	1	3.25417	2.62709	4.59735	233805(Dcun1d3),73919(Lyrm1)
NC_000073.6	128238036	128238644	17	1	3.07706	2.53853	4.4643	233912(Armc5)
NC_000074.6	14911276	14911834	31	6	1.93078	3.77274	3.43979	234094(Arhgef10)
NC_000074.6	25601426	25602708	50	4	2.95173	3.79779	7.46594	234135(Nsd3)
NC_000074.6	69625034	69625597	21	1	3.30762	2.65381	4.87665	234362(Zfp868)
NC_000074.6	70234283	70234985	35	3	2.87346	3.43673	5.6101	234373(Sugp2),76813(Armc6)
NC_000074.6	70476503	70477148	24	4	2.13257	3.38821	3.28004	234378(Klhl26)
NC_000074.6	70873027	70873950	28	6	1.81768	3.71619	3.01816	234388(Ccdc124)
NC_000074.6	94917400	94918548	47	6	2.39665	4.00568	5.69855	234582(Ccdc102a)
NC_000074.6	99476219	99476587	7	0	3.14533	1.57266	3.0103	234624(A330008L17Rik)
NC_000074.6	104442417	104443091	25	0	4.49956	2.24978	NA	234663(Dync1li2)
NC_000074.6	104434037	104434587	11	0	3.61119	1.8056	3.91339	234663(Dync1li2)
NC_000074.6	110618304	110618934	22	3	2.3587	3.17935	3.59865	234729(Vac14)
NC_000074.6	116943198	116943921	22	4	2.03677	3.34031	3.05312	234776(Atmin),66531(Cmc2)
NC_000074.6	120113894	120114802	42	5	2.49265	3.83129	5.55481	234797(6430548M08Rik)
NC_000075.6	8042402	8042910	13	2	2.20335	2.68664	3.03833	234912(Cfap300)
NC_000075.6	15731245	15731990	14	2	2.28262	2.72627	3.285	234967(Slc36a4)
NC_000075.6	22286132	22286526	8	0	3.28066	1.64033	3.31133	235050(Zfp810)
NC_000075.6	25252291	25253506	45	10	1.69567	4.30727	3.68844	235072(Sept7)
NC_000075.6	31386010	31386670	31	4	2.41621	3.53003	4.45581	235134(Nfrkb)
NC_000075.6	35211001	35211608	16	0	4.01139	2.00569	5.11751	235169(Foxred1),67398(Srpr)
NC_000075.6	37488910	37490086	52	12	1.61741	4.50915	3.75499	235184(Msantd2)
NC_000075.6	51008085	51009494	71	16	1.5824	4.87867	4.47503	235344(Sik2)
NC_000075.6	62536260	62537266	46	7	2.17981	4.08991	4.94875	235431(Coro2b)
NC_000075.6	66592028	66593476	50	5	2.68869	3.92931	6.7808	235441(Usp3)
NC_000075.6	66856277	66856550	8	0	3.28066	1.64033	3.31133	235442(Rab8b)
NC_000075.6	72274495	72275582	42	7	2.07761	4.03881	4.50509	235469(Zfp280d)
NC_000075.6	74952611	74953437	28	6	1.81768	3.71619	3.01816	235493(Fam214a)
NC_000075.6	96119031	96119824	22	4	2.03677	3.34031	3.05312	235533(Gk5)
NC_000075.6	101251066	101252064	50	13	1.4663	4.54051	3.2552	235542(Ppp2r3a)
NC_000075.6	107935701	107936327	24	2	2.86954	3.01973	4.53604	235604(Camkv)
NC_000075.6	109094852	109096318	57	12	1.72099	4.56094	4.32705	235611(Plxnb1)
NC_000075.6	110531925	110533435	79	13	1.98357	4.79914	6.36168	235626(Setd2)
NC_000075.6	114688548	114689492	31	4	2.41621	3.53003	4.45581	235661(Dync1li1)
NC_000074.6	71881790	71882433	14	0	3.86758	1.93379	4.81648	236193(Zfp709)
NC_000076.6	80843718	80844344	25	3	2.49956	3.24978	4.08961	237403(Lingo3)
NC_000076.6	93160482	93161774	61	10	2.03863	4.47875	5.53229	237459(Cdk17)
NC_000076.6	111164389	111165660	44	7	2.12985	4.06492	4.72589	237542(Osbpl8)
NC_000077.6	53478557	53479987	44	8	1.95992	4.14989	4.27328	237761(Sowaha)
NC_000077.6	102555482	102556639	32	6	1.96614	3.79042	3.43979	237943(Gpatch8)
NC_000077.6	121204093	121205003	30	6	1.8943	3.75451	3.22741	238023(Hexdc),66179(Ogfod3)
NC_000075.6	59485661	59486924	63	17	1.36461	4.85223	3.31196	23806(Arih1)
NC_000075.6	108648617	108649687	28	6	1.81768	3.71619	3.01816	23807(Arih2)
NC_000074.6	25840135	25840997	33	4	2.48586	3.56486	4.69786	23808(Ash2l)
NC_000085.6	5366042	5366876	39	8	1.82459	4.08222	3.64935	23825(Banf1),69860(Eif1ad)
NC_000078.6	87199541	87200669	41	5	2.46562	3.81777	5.3142	238333(Samd15),382620(Tmed8)
NC_000078.6	102128566	102129274	25	3	2.49956	3.24978	4.08961	238384(Slc24a4)
NC_000078.6	102877394	102878659	70	10	2.19437	4.55661	6.62225	238386(Btbd7)
NC_000078.6	102867261	102867872	24	4	2.13257	3.38821	3.28004	238386(Btbd7),634678(Gm7143)
NC_000068.7	180701429	180701998	15	1	2.94173	2.47087	3.91339	23856(Dido1)
NC_000068.7	180709858	180710777	35	6	2.06611	3.84041	3.87315	23856(Dido1),76425(Gid8)
NC_000079.6	64152375	64153382	43	9	1.7821	4.21298	3.66464	238673(Zfp367)
NC_000075.6	32695758	32696322	24	4	2.13257	3.38821	3.28004	23871(Ets1)
NC_000079.6	76056031	76056690	16	3	2.01139	3.00569	3.03428	238725(Gpr150)
NC_000075.6	98986055	98986793	29	3	2.66398	3.33199	4.58931	23873(Faim)
NC_000078.6	101818547	101819420	35	4	2.55154	3.5977	4.94184	23876(Fbln5)
NC_000077.6	69632631	69633507	47	11	1.61904	4.39448	3.52967	23879(Fxr2)
NC_000079.6	98925780	98926960	46	9	1.85788	4.25087	4.06789	238799(Tnpo1)
NC_000071.6	92137506	92138499	47	8	2.03408	4.18696	4.701	23881(G3bp2),56041(Uso1)
NC_000079.6	109902190	109903517	53	9	2.0174	4.33063	4.90247	238871(Pde4d)
NC_000069.6	144569414	144570448	48	9	1.90576	4.27481	4.2732	23908(Hs2st1),93684(Selenof)
NC_000080.6	54640815	54641787	39	8	1.82459	4.08222	3.64935	239096(Cdh24)
NC_000080.6	54631969	54632775	32	7	1.77349	3.88675	3.02827	239096(Cdh24)
NC_000080.6	57524840	57526009	56	11	1.81649	4.49321	4.50079	239114(Il17d)
NC_000072.6	29215676	29216337	28	6	1.81768	3.71619	3.01816	23917(Impdh1)
NC_000081.6	33687209	33687846	20	3	2.25417	3.12709	3.11807	239364(Tspyl5)
NC_000075.6	63377507	63378035	26	2	2.95796	3.06394	4.80008	23938(Map2k5)
NC_000081.6	39943570	39944403	32	6	1.96614	3.79042	3.43979	239393(Lrp12)
NC_000076.6	128525341	128526086	24	3	2.4545	3.22725	3.84294	23943(Esyt1)
NC_000081.6	91572417	91573473	33	5	2.22283	3.69638	4.13933	239606(Slc2a13)
NC_000074.6	48554845	48555733	32	6	1.96614	3.79042	3.43979	23965(Tenm3)
NC_000078.6	31558795	31559617	28	6	1.81768	3.71619	3.01816	23985(Slc26a4)
NC_000073.6	80232346	80233034	34	5	2.25613	3.71303	4.37016	23991(Cib1),269952(Gdpgp1)
NC_000068.7	76647476	76648648	30	5	2.11669	3.64331	3.6849	23992(Prkra)
NC_000083.6	5189693	5190495	20	0	4.25417	2.12709	6.0206	239985(Arid1b)
NC_000083.6	4993932	4996852	142	39	1.13634	5.8901	4.51476	239985(Arid1b)
NC_000086.7	161717138	161717640	13	2	2.20335	2.68664	3.03833	24004(Rai2)
NC_000083.6	26414677	26415554	32	4	2.45156	3.54771	4.45581	240055(Neurl1b)
NC_000083.6	26438711	26439589	30	5	2.11669	3.64331	3.6849	240055(Neurl1b)
NC_000083.6	29237503	29238436	57	13	1.61408	4.61439	3.98059	240058(Cpne5)
NC_000070.6	33309987	33310855	30	4	2.37973	3.51179	4.21584	24018(Rngtt)
NC_000084.6	4670968	4671477	13	2	2.20335	2.68664	3.03833	240185(Jcad)
NC_000084.6	44828284	44829101	30	5	2.11669	3.64331	3.6849	240255(Ythdc2)
NC_000084.6	49832483	49833281	32	6	1.96614	3.79042	3.43979	240283(Dmxl1)
NC_000084.6	61707286	61707955	16	2	2.42642	2.79817	3.53488	240334(Pcyox1l)
NC_000084.6	65430625	65431703	31	6	1.93078	3.77274	3.43979	240354(Malt1)
NC_000084.6	80150682	80151817	48	11	1.64273	4.40633	3.52967	240442(Adnp2)
NC_000084.6	80322366	80323388	46	12	1.47937	4.44013	3.02796	240444(Kcng2)
NC_000085.6	4942604	4943302	22	4	2.03677	3.34031	3.05312	240518(Peli3)
NC_000085.6	29805220	29806765	71	21	1.21044	5.06465	3.09993	240613(9930021J03Rik)
NC_000085.6	38395547	38396632	37	7	1.93559	3.96779	3.85629	240660(Slc35g1)
NC_000085.6	40830982	40831734	31	5	2.15317	3.66155	3.91086	240665(Ccnj)
NC_000085.6	53529034	53529863	20	3	2.25417	3.12709	3.11807	240672(Dusp5)
NC_000085.6	46396859	46397438	20	3	2.25417	3.12709	3.11807	24069(Sufu)
NC_000067.6	12875421	12875958	29	6	1.85663	3.73567	3.01816	240726(Slco5a1)
NC_000077.6	105180746	105182439	63	18	1.28661	4.89123	3.0532	24086(Tlk2),73431(1700052K11Rik)
NC_000067.6	161034138	161034911	34	6	2.03374	3.82423	3.87315	240869(Zbtb37)
NC_000071.6	148552131	148553143	25	2	2.9146	3.04226	4.80008	24109(Ubl3)
NC_000071.6	33935513	33936434	34	6	2.03374	3.82423	3.87315	24116(Nelfa)
NC_000068.7	30237397	30238424	59	6	2.65303	4.13387	7.38485	241296(Lrrc8a),67350(1700084E18Rik)
NC_000083.6	21488934	21489362	8	0	3.28066	1.64033	3.31133	24132(Zfp53)
NC_000068.7	68861145	68861701	20	2	2.66921	2.91957	3.75443	241447(Cers6)
NC_000068.7	76003573	76003875	7	0	3.14533	1.57266	3.0103	241489(Pde11a)
NC_000068.7	91710667	91711205	16	3	2.01139	3.00569	3.03428	241547(Harbi1)
NC_000068.7	130642313	130643186	32	4	2.45156	3.54771	4.45581	241638(Lzts3)
NC_000068.7	168280643	168281319	30	6	1.8943	3.75451	3.22741	241794(Kcng1)
NC_000068.7	180024404	180025737	47	5	2.61904	3.89448	6.28613	241846(Lsm14b)
NC_000069.6	69316560	69317633	39	8	1.82459	4.08222	3.64935	242083(Ppm1l)
NC_000069.6	122729671	122730697	34	6	2.03374	3.82423	3.87315	242202(Pde5a)
NC_000070.6	9859518	9860181	25	3	2.49956	3.24978	4.08961	242316(Gdf6)
NC_000070.6	26346326	26346856	14	2	2.28262	2.72627	3.285	242362(Manea)
NC_000070.6	33188786	33189941	49	13	1.44355	4.52913	3.08052	242377(Pm20d2)
NC_000070.6	36213233	36213694	13	2	2.20335	2.68664	3.03833	242384(Lingo2)
NC_000070.6	43668962	43669790	31	6	1.93078	3.77274	3.43979	242409(Tmem8b)
NC_000070.6	46990990	46992129	51	8	2.12604	4.23295	5.13708	242425(Gabbr2)
NC_000070.6	56946548	56947740	44	10	1.67042	4.29464	3.4952	242474(Tmem245)
NC_000070.6	88721986	88722871	30	4	2.37973	3.51179	4.21584	242521(Klhl9)
NC_000070.6	103113966	103115096	39	5	2.40956	3.78974	5.07533	242584(Wdr78),71148(Mier1)
NC_000070.6	133130273	133131061	24	2	2.86954	3.01973	4.53604	242687(Wasf2)
NC_000070.6	152008661	152009958	48	1	4.22769	3.11385	9.73186	242785(Klhl21)
NC_000070.6	154855403	154856532	30	3	2.70166	3.35083	4.84203	242800(Ttc34)
NC_000071.6	21701203	21701788	19	2	2.61315	2.89154	3.498	242864(Napepld)
NC_000071.6	30113823	30115103	38	6	2.15808	3.88639	4.3168	242915(Garem2)
NC_000071.6	43781606	43782593	31	4	2.41621	3.53003	4.45581	242960(Fbxl5)
NC_000071.6	139912253	139912924	41	10	1.59115	4.255	3.11714	243312(Elfn1)
NC_000071.6	151368266	151368789	10	0	3.51122	1.75561	3.61236	243362(Stard13),625175(1700028E10Rik)
NC_000072.6	4902857	4903895	41	7	2.05058	4.02529	4.28648	243725(Ppp1r9a)
NC_000073.6	4658121	4659305	47	11	1.61904	4.39448	3.52967	243819(Ppp6r1)
NC_000073.6	16815975	16816977	52	9	1.99593	4.31989	4.90247	243853(Fkrp),97387(Strn4)
NC_000073.6	45693725	45694518	34	4	2.51917	3.58151	4.94184	243967(Ntn5),56546(Sec1)
NC_000073.6	48788911	48789412	15	2	2.35677	2.76335	3.285	243983(Zdhhc13)
NC_000073.6	97331887	97332769	29	1	3.66398	2.83199	6.287	244144(Usp35),622320(Kctd21)
NC_000073.6	114562770	114563226	16	1	3.01139	2.50569	4.18809	244209(Cyp2r1)
NC_000073.6	127254193	127254812	25	4	2.17764	3.41075	3.51	244216(Zfp771)
NC_000073.6	127875561	127876364	23	3	2.4076	3.2038	3.59865	244219(Zfp668)
NC_000074.6	14095421	14097230	54	9	2.03848	4.34117	5.11635	244310(Dlgap2)
NC_000074.6	18594899	18595845	29	4	2.34205	3.49296	3.9781	244329(Mcph1)
NC_000074.6	36094443	36095191	35	7	1.87346	3.93673	3.43645	244418(Prag1)
NC_000074.6	55897582	55898018	11	1	2.61119	2.3056	3.10048	244486(Adam29)
NC_000074.6	86530879	86531349	13	2	2.20335	2.68664	3.03833	244562(Abcc12)
NC_000074.6	105900214	105900777	16	3	2.01139	3.00569	3.03428	244631(Pskh1)
NC_000075.6	53541808	53542135	7	0	3.14533	1.57266	3.0103	244879(Npat)
NC_000075.6	95857470	95858294	24	3	2.4545	3.22725	3.84294	245000(Atr),73410(1700065D16Rik)
NC_000075.6	96719330	96720363	35	7	1.87346	3.93673	3.43645	245007(Zbtb38)
NC_000075.6	120303358	120304732	40	10	1.56346	4.24116	3.11714	245049(Myrip)
NC_000068.7	156064912	156065946	47	7	2.204	4.102	5.17358	245865(Spag4)
NC_000076.6	80494604	80496270	55	12	1.68068	4.54078	4.13403	246086(Onecut3)
NC_000081.6	102203166	102204450	58	7	2.44108	4.22054	6.55886	246277(Csad),68744(Zfp740)
NC_000070.6	6990655	6991557	34	8	1.67117	4.00551	3.04994	252838(Tox)
NC_000082.6	8737847	8739295	51	12	1.59553	4.4982	3.56918	252870(Usp7)
NC_000068.7	180272996	180273865	29	6	1.85663	3.73567	3.01816	252966(Cables2)
NC_000073.6	24481623	24482609	67	17	1.43427	4.88706	3.81635	260299(Cadm4)
NC_000083.6	79354704	79355804	42	5	2.49265	3.83129	5.55481	260409(Cdc42ep3)
NC_000074.6	11556030	11557821	88	19	1.59149	5.11767	5.15525	26356(Ing1)
NC_000085.6	6921241	6922144	39	7	1.99452	3.99726	4.07017	26379(Esrra)
NC_000079.6	55444923	55445903	31	6	1.93078	3.77274	3.43979	26385(Grk6)
NC_000068.7	167492274	167493255	42	6	2.27026	3.94248	4.99902	263876(Spata2),81018(Rnf114)
NC_000075.6	64252843	64253791	34	8	1.67117	4.00551	3.04994	26395(Map2k1)
NC_000076.6	81105871	81106445	28	2	3.04007	3.105	5.33258	26396(Map2k2)
NC_000077.6	65787420	65788472	34	4	2.51917	3.58151	4.94184	26398(Map2k4)
NC_000076.6	19933610	19935185	75	10	2.27256	4.59571	7.29409	26408(Map3k5)
NC_000073.6	126759296	126760083	36	2	3.31998	3.24495	6.68489	26417(Mapk3)
NC_000075.6	92542017	92542709	18	2	2.55422	2.86207	3.498	26432(Plod2),78575(B430319G15Rik)
NC_000068.7	180041796	180043381	68	18	1.37304	4.93445	3.53754	26444(Psma7),269397(Ss18l1)
NC_000084.6	70529917	70530491	16	0	4.01139	2.00569	5.11751	26447(Poli)
NC_000085.6	44988900	44989817	33	6	2.00044	3.80757	3.6551	26456(Sema4g)
NC_000079.6	93303635	93304787	53	14	1.43244	4.62311	3.13558	26556(Homer1)
NC_000070.6	100095828	100096687	25	5	1.9146	3.54226	3.02404	26563(Ror1)
NC_000069.6	90389110	90389751	14	2	2.28262	2.72627	3.285	26568(Slc27a3)
NC_000068.7	29802528	29803190	35	6	2.06611	3.84041	3.87315	26569(Slc27a4)
NC_000069.6	50404086	50404476	8	0	3.28066	1.64033	3.31133	26570(Slc7a11)
NC_000075.6	56046273	56046663	10	0	3.51122	1.75561	3.61236	26611(Rcn2)
NC_000076.6	11149323	11150092	27	3	2.58471	3.29236	4.33845	268281(Shprh)
NC_000076.6	123264869	123265529	18	2	2.55422	2.86207	3.498	268354(Fam19a2)
NC_000077.6	6415567	6416582	55	8	2.21119	4.27552	5.80522	268373(Ppia)
NC_000077.6	77982397	77983445	41	4	2.72865	3.68625	5.93488	268448(Phf12)
NC_000077.6	116918441	116919597	67	14	1.6973	4.75554	4.77287	268510(Mgat5b)
NC_000078.6	78225978	78227043	49	5	2.66594	3.91793	6.5328	268566(Gphn)
NC_000080.6	33530055	33530527	11	1	2.61119	2.3056	3.10048	268729(Frmpd2)
NC_000071.6	14536658	14536936	7	0	3.14533	1.57266	3.0103	26875(Pclo)
NC_000069.6	69598323	69599338	45	10	1.69567	4.30727	3.68844	26879(B3galnt1)
NC_000082.6	32246481	32247432	36	6	2.09759	3.85615	4.09376	268882(Fbxo45),68980(Wdr53)
NC_000082.6	76372083	76373535	61	11	1.9131	4.54151	5.11006	268903(Nrip1)
NC_000071.6	100546135	100546732	13	1	2.78831	2.39415	3.64039	26891(Cops4)
NC_000083.6	75005424	75006625	55	14	1.47422	4.644	3.48244	268977(Ltbp1)
NC_000083.6	78735919	78736981	43	5	2.51907	3.8445	5.55481	268980(Strn)
NC_000084.6	14682121	14683299	60	7	2.47938	4.23969	7.03267	268996(Ss18)
NC_000084.6	31634590	31635226	15	2	2.35677	2.76335	3.285	269003(Sap130)
NC_000067.6	133908162	133908948	20	2	2.66921	2.91957	3.75443	269120(Optc)
NC_000079.6	56134450	56135968	59	16	1.37292	4.77392	3.25159	26914(H2afy)
NC_000067.6	178528505	178529275	21	3	2.30762	3.15381	3.35694	269152(Kif26b)
NC_000067.6	37540416	37541320	37	4	2.61366	3.62876	5.43515	269181(Mgat4a)
NC_000067.6	60180039	60181148	42	8	1.90769	4.12377	4.06282	269198(Nbeal1)
NC_000068.7	35109385	35110100	26	1	3.54293	2.77146	5.72042	26920(Cntrl)
NC_000067.6	39900409	39901453	41	8	1.88065	4.11025	3.8548	26921(Map4k4)
NC_000068.7	3118116	3119088	53	13	1.53198	4.57334	3.43266	269233(Fam171a1)
NC_000068.7	29124755	29125633	30	3	2.70166	3.35083	4.84203	269254(Setx)
NC_000078.6	110446735	110447811	57	9	2.09951	4.37168	5.54974	26931(Ppp2r5c)
NC_000078.6	75595331	75596677	60	12	1.77894	4.58991	4.71961	26932(Ppp2r5e)
NC_000081.6	99651069	99651822	29	6	1.85663	3.73567	3.01816	26934(Racgap1)
NC_000070.6	45084163	45084807	31	7	1.73813	3.86907	3.02827	269529(Fbxo10)
NC_000070.6	48473003	48473643	34	3	2.8411	3.42055	5.6101	269536(Tex10)
NC_000070.6	136469573	136470768	56	12	1.70101	4.55095	4.13403	269593(Luzp1)
NC_000070.6	152086480	152087447	36	8	1.73502	4.03743	3.24675	269608(Plekhg5)
NC_000071.6	23434099	23434801	17	1	3.07706	2.53853	4.4643	269630(5031425E22Rik),69188(Kmt2e)
NC_000072.6	47453710	47455244	70	18	1.40587	4.95086	3.70387	26965(Cul1)
NC_000071.6	121220096	121220789	24	4	2.13257	3.38821	3.28004	269700(Hectd4)
NC_000071.6	124327698	124328310	19	2	2.61315	2.89154	3.498	269702(Mphosph9),72650(2810006K23Rik)
NC_000071.6	134551862	134552649	35	7	1.87346	3.93673	3.43645	269713(Clip2)
NC_000072.6	86849136	86849929	36	4	2.58302	3.61344	5.18764	269774(Aak1),67170(2610306M01Rik)
NC_000072.6	21851705	21852211	16	3	2.01139	3.00569	3.03428	269831(Tspan12)
NC_000067.6	87213867	87214583	26	2	2.95796	3.06394	4.80008	26987(Eif4e2)
NC_000073.6	80114549	80115517	42	6	2.27026	3.94248	4.99902	269951(Idh2)
NC_000074.6	9229587	9230339	24	3	2.4545	3.22725	3.84294	270028(Fam155a)
NC_000072.6	129618418	129618786	7	0	3.14533	1.57266	3.0103	27007(Klrk1)
NC_000075.6	16501680	16502307	21	1	3.30762	2.65381	4.87665	270120(Fat3)
NC_000075.6	59750493	59751457	45	6	2.34775	3.98123	5.46362	270163(Myo9a),71599(Senp8)
NC_000075.6	121759866	121760654	34	2	3.25613	3.21303	6.41235	270210(Zfp651),320301(E530011L22Rik)
NC_000069.6	86122279	86122669	8	0	3.28066	1.64033	3.31133	27059(Sh3d19)
NC_000068.7	118388462	118389050	12	1	2.70316	2.35158	3.36932	27103(Eif2ak4)
NC_000082.6	55973567	55974985	53	9	2.0174	4.33063	4.90247	271377(Zbtb11),66391(Zbtb11os1)
NC_000083.6	53479144	53479986	36	8	1.73502	4.03743	3.24675	271457(Rab5a)
NC_000069.6	132683911	132684425	15	2	2.35677	2.76335	3.285	271981(Tbck)
NC_000070.6	46138125	46138866	20	2	2.66921	2.91957	3.75443	272027(Tstd2),433702(Ncbp1)
NC_000071.6	8422478	8423340	50	9	1.95173	4.29779	4.69059	27214(Dbf4),319653(Slc25a40)
NC_000083.6	56040296	56040895	25	2	2.9146	3.04226	4.80008	27221(Chaf1a)
NC_000070.6	136021062	136022023	54	10	1.90098	4.40992	4.69162	27224(Eloa)
NC_000073.6	65644396	65645567	52	7	2.31785	4.15893	5.85893	272396(Tarsl2)
NC_000075.6	99326516	99326921	9	0	3.40171	1.70086	3.61236	272636(Esyt3)
NC_000078.6	102487673	102488281	15	1	2.94173	2.47087	3.91339	27277(Golga5)
NC_000067.6	135765676	135766942	55	11	1.79615	4.48304	4.50079	27280(Phlda3)
NC_000069.6	20154502	20155348	30	5	2.11669	3.64331	3.6849	27357(Gyg)
NC_000085.6	53142677	53143450	28	6	1.81768	3.71619	3.01816	27360(Add3)
NC_000084.6	80206498	80207319	28	3	2.62503	3.31252	4.58931	27366(Txnl4a)
NC_000071.6	135149315	135150070	22	3	2.3587	3.17935	3.59865	27368(Tbl2)
NC_000081.6	79441439	79442420	52	11	1.73289	4.45141	4.1052	27373(Csnk1e)
NC_000083.6	46650131	46650982	33	5	2.22283	3.69638	4.13933	27398(Mrpl2),66515(Cul7)
NC_000082.6	5203215	5203942	19	2	2.61315	2.89154	3.498	27426(Nagpa)
NC_000071.6	92941291	92943404	73	18	1.45342	4.97464	4.04335	27428(Shroom3)
NC_000071.6	92778660	92779178	11	1	2.61119	2.3056	3.10048	27428(Shroom3)
NC_000077.6	113683439	113684185	24	4	2.13257	3.38821	3.28004	276852(D11Wsu47e),28081(Fam104a)
NC_000084.6	34776692	34777860	52	9	1.99593	4.31989	4.90247	277250(Kdm3b)
NC_000068.7	31152311	31152662	14	2	2.28262	2.72627	3.285	277463(Gpr107)
NC_000071.6	32863321	32863984	25	4	2.17764	3.41075	3.51	277854(Depdc5)
NC_000067.6	166378730	166379995	63	7	2.53454	4.26727	7.27155	27878(Tada1)
NC_000075.6	65460789	65461342	16	2	2.42642	2.79817	3.53488	27965(Spg21)
NC_000072.6	22355672	22356457	32	6	1.96614	3.79042	3.43979	27999(Fam3c)
NC_000085.6	10895144	10895860	16	3	2.01139	3.00569	3.03428	28000(Prpf19)
NC_000075.6	71485419	71486099	23	3	2.4076	3.2038	3.59865	28015(Polr2m)
NC_000073.6	122066593	122068181	58	15	1.44108	4.72054	3.36246	28018(Ubfd1),67417(Ears2)
NC_000069.6	127552676	127553234	14	0	3.86758	1.93379	4.81648	28036(Larp7)
NC_000069.6	96600917	96601779	29	3	2.66398	3.33199	4.58931	280411(Lix1l)
NC_000079.6	69611953	69612557	15	1	2.94173	2.47087	3.91339	28114(Nsun2)
NC_000075.6	102625583	102626566	31	7	1.73813	3.86907	3.02827	28135(Cep63),69010(Anapc13)
NC_000082.6	57121513	57122178	22	4	2.03677	3.34031	3.05312	28185(Tomm70a)
NC_000072.6	43665785	43666432	28	1	3.62503	2.81252	6.287	29807(Tpk1)
NC_000068.7	119872688	119873516	28	3	2.62503	3.31252	4.58931	29808(Mga)
NC_000067.6	160792063	160793132	59	8	2.29046	4.31516	6.25905	29809(Rabgap1l)
NC_000073.6	128523545	128524467	30	3	2.70166	3.35083	4.84203	29810(Bag3)
NC_000081.6	81960542	81961205	22	3	2.3587	3.17935	3.59865	29858(Pmm1)
NC_000070.6	34882263	34883206	37	8	1.76566	4.05276	3.44661	30046(Zfp292)
NC_000078.6	71136288	71136750	9	0	3.40171	1.70086	3.61236	30056(Timm9)
NC_000075.6	30942312	30943421	44	10	1.67042	4.29464	3.4952	30806(Adamts8)
NC_000071.6	122899570	122900927	51	9	1.97404	4.30895	4.69059	30841(Kdm2b)
NC_000080.6	31018863	31019658	33	3	2.80779	3.4039	5.35254	30877(Gnl3),66923(Pbrm1)
NC_000073.6	137437393	137438211	29	5	2.07902	3.62447	3.46164	30926(Glrx3)
NC_000074.6	122460415	122460980	16	2	2.42642	2.79817	3.53488	30927(Snai3)
NC_000068.7	30967224	30968149	26	1	3.54293	2.77146	5.72042	30931(Tor1a)
NC_000068.7	30952383	30953630	39	8	1.82459	4.08222	3.64935	30934(Tor1b)
NC_000082.6	77013407	77014395	52	9	1.99593	4.31989	4.90247	30940(Usp25)
NC_000077.6	50827223	50827882	13	1	2.78831	2.39415	3.64039	30944(Zfp354c)
NC_000083.6	65612550	65614075	62	11	1.93148	4.5507	5.31705	30960(Vapa)
NC_000084.6	75000431	75000961	29	4	2.34205	3.49296	3.9781	319195(Rpl17)
NC_000076.6	83543548	83544410	31	5	2.15317	3.66155	3.91086	319277(Washc4)
NC_000077.6	116433762	116435087	38	7	1.96543	3.98272	3.85629	319370(Ubald2)
NC_000078.6	116405048	116405931	29	0	4.66398	2.33199	NA	319545(D430020J02Rik),76044(Ncapg2)
NC_000074.6	9977657	9978305	24	4	2.13257	3.38821	3.28004	319583(Lig4),68904(Abhd13)
NC_000081.6	44787586	44788065	11	1	2.61119	2.3056	3.10048	319613(Sybu),69659(2310069G16Rik)
NC_000083.6	80163118	80163600	15	1	2.94173	2.47087	3.91339	319625(Galm)
NC_000072.6	88874425	88875398	36	8	1.73502	4.03743	3.24675	319655(Podxl2)
NC_000078.6	70825094	70826135	45	3	3.1551	3.57755	7.44793	319710(Frmd6)
NC_000073.6	5030106	5032274	86	25	1.18686	5.29387	3.37686	319748(Zfp865)
NC_000075.6	72531715	72532677	44	9	1.80792	4.22589	3.865	319758(Rfx7),75115(4930509E16Rik)
NC_000082.6	22162435	22163765	65	13	1.76254	4.68862	4.93958	319765(Igf2bp2)
NC_000077.6	75348121	75348840	18	2	2.55422	2.86207	3.498	319822(Smyd4),68275(Rpa1)
NC_000076.6	94533476	94533979	11	1	2.61119	2.3056	3.10048	319880(Tmcc3)
NC_000070.6	44756447	44757141	22	2	2.77374	2.97183	4.27364	319885(Zcchc7)
NC_000075.6	21852167	21852967	26	5	1.95796	3.56394	3.02404	319899(Dock6)
NC_000067.6	111864388	111865229	26	5	1.95796	3.56394	3.02404	319901(Dsel)
NC_000081.6	55071765	55072315	14	2	2.28262	2.72627	3.285	319944(Taf2)
NC_000067.6	75478563	75479664	44	8	1.95992	4.14989	4.27328	319998(Tmem198),74241(Chpf)
NC_000082.6	44332203	44332641	11	1	2.61119	2.3056	3.10048	320007(Sidt1)
NC_000067.6	136415134	136415877	25	2	2.9146	3.04226	4.80008	320054(9230116N13Rik),67997(Ddx59)
NC_000083.6	8340577	8342197	80	23	1.22023	5.19508	3.38813	320111(Prr18)
NC_000076.6	111009386	111010513	40	6	2.21554	3.91512	4.76955	320150(Zdhhc17)
NC_000083.6	71679291	71680082	20	3	2.25417	3.12709	3.11807	320159(Togaram2)
NC_000074.6	25201150	25202039	40	5	2.43793	3.80393	5.3142	320165(Tacc1)
NC_000074.6	26119173	26119933	36	2	3.31998	3.24495	6.68489	320191(Hook3),77733(Rnf170)
NC_000070.6	83525149	83525830	25	2	2.9146	3.04226	4.80008	320226(Ccdc171)
NC_000078.6	85824796	85825481	22	1	3.3587	2.67935	5.157	320244(Ttll5),58520(Erg28)
NC_000068.7	31572460	31573276	27	4	2.26278	3.45332	3.74275	320267(Fubp3)
NC_000067.6	194976143	194976924	26	4	2.221	3.43243	3.51	320400(Gm16897)
NC_000070.6	99715349	99715994	16	1	3.01139	2.50569	4.18809	320438(Alg6)
NC_000077.6	95145927	95146478	21	1	3.30762	2.65381	4.87665	320453(Dlx4os)
NC_000069.6	34663960	34664398	13	1	2.78831	2.39415	3.64039	320478(Sox2ot)
NC_000083.6	32392327	32393032	24	3	2.4545	3.22725	3.84294	320484(Rasal3)
NC_000072.6	86471953	86472715	27	4	2.26278	3.45332	3.74275	320486(A430078I02Rik)
NC_000078.6	51970733	51971628	42	10	1.61818	4.26852	3.30472	320487(Heatr5a)
NC_000070.6	100776489	100777324	30	6	1.8943	3.75451	3.22741	320508(Cachd1)
NC_000072.6	38433771	38434980	50	13	1.4663	4.54051	3.2552	320538(Ubn2)
NC_000068.7	104711658	104712586	43	8	1.9341	4.13698	4.06282	320554(Tcp11l1),622282(Gm6306)
NC_000071.6	36695248	36696250	36	7	1.90494	3.95247	3.645	320661(D5Ertd579e)
NC_000076.6	69212410	69213348	28	4	2.3031	3.47348	3.9781	320700(A930033H14Rik),69288(Rhobtb1)
NC_000068.7	157078115	157079667	69	19	1.31557	4.97971	3.43633	320706(Soga1),383766(Tldc2)
NC_000071.6	122284136	122285102	40	6	2.21554	3.91512	4.76955	320717(Pptc7)
NC_000070.6	8689939	8692335	119	33	1.16933	5.67213	4.0866	320790(Chd7)
NC_000076.6	9674314	9674850	11	1	2.61119	2.3056	3.10048	320825(Samd5)
NC_000070.6	154635093	154637054	78	24	1.13261	5.21016	3.01488	320939(5930403L14Rik),70673(Prdm16)
NC_000067.6	88701451	88702633	37	8	1.76566	4.05276	3.44661	320982(Arl4c)
NC_000075.6	106821839	106822566	37	7	1.93559	3.96779	3.85629	321006(Dcaf1)
NC_000075.6	103364638	103366048	64	13	1.745	4.67985	4.74362	321022(Cdv3)
NC_000068.7	121354696	121355635	41	10	1.59115	4.255	3.11714	327655(Ppip5k1)
NC_000076.6	117147814	117148916	53	11	1.75437	4.46215	4.1052	327826(Frs2)
NC_000077.6	86357166	86357849	32	5	2.18853	3.67923	3.91086	327987(Med13)
NC_000078.6	65036104	65036869	29	4	2.34205	3.49296	3.9781	328110(Prpf39)
NC_000078.6	111677992	111678342	9	0	3.40171	1.70086	3.61236	328162(Trmt61a)
NC_000079.6	43303332	43304660	54	13	1.55306	4.58388	3.61279	328232(Gfod1)
NC_000079.6	103920082	103922016	78	13	1.96912	4.79191	6.36168	328330(D130037M23Rik),59079(Erbin)
NC_000084.6	61507831	61508321	12	1	2.70316	2.35158	3.36932	328967(Arhgef37)
NC_000084.6	82914137	82915161	50	5	2.68869	3.92931	6.7808	329003(Zfp516)
NC_000068.7	153492206	153493520	53	14	1.43244	4.62311	3.13558	329540(Nol4l),78151(4930404H24Rik)
NC_000068.7	164911073	164911865	29	6	1.85663	3.73567	3.01816	329559(Zfp335),629777(Zfp335os)
NC_000069.6	59005391	59007478	87	18	1.6525	5.07418	5.48197	329650(Med12l)
NC_000069.6	109027041	109028022	29	6	1.85663	3.73567	3.01816	329739(Fam102b)
NC_000071.6	106925561	106926539	53	12	1.63889	4.51988	3.75499	330149(Hfm1)
NC_000071.6	123075911	123076650	34	1	3.8411	2.92055	7.42783	330189(Tmem120b)
NC_000071.6	141240997	141242445	63	13	1.72718	4.67095	4.54965	330222(Sdk1)
NC_000072.6	5298085	5298644	20	0	4.25417	2.12709	6.0206	330260(Pon2)
NC_000073.6	16400043	16401585	65	10	2.11046	4.51466	6.18153	330474(Zc3h4)
NC_000076.6	43478540	43480161	90	14	2.03206	4.92292	7.1996	331623(Bend3)
NC_000085.6	60755712	60757214	66	13	1.77982	4.69726	4.93958	332397(Nanos1)
NC_000068.7	26351505	26352696	34	8	1.67117	4.00551	3.04994	332579(Card9),52838(Dnlz)
NC_000071.6	117413438	117414551	34	8	1.67117	4.00551	3.04994	333050(Ksr2)
NC_000072.6	29482608	29483078	13	2	2.20335	2.68664	3.03833	333088(Kcp)
NC_000071.6	65763145	65764803	99	23	1.46235	5.31614	5.00663	333789(N4bp2)
NC_000067.6	183369110	183369987	32	1	3.77349	2.88675	6.85627	338366(Mia3)
NC_000077.6	80779481	80780545	39	9	1.67259	4.15822	3.2721	338367(Myo1d)
NC_000067.6	89454286	89455574	50	10	1.81423	4.36654	4.28341	347722(Agap1)
NC_000067.6	89878701	89879055	7	0	3.14533	1.57266	3.0103	347722(Agap1)
NC_000077.6	98982130	98983022	24	2	2.86954	3.01973	4.53604	353155(Gjd3)
NC_000068.7	26586377	26586973	28	6	1.81768	3.71619	3.01816	353156(Egfl7)
NC_000072.6	55037631	55038443	31	2	3.15317	3.16155	5.87024	353172(Gars)
NC_000080.6	18238074	18239697	52	13	1.5105	4.5626	3.43266	353187(Nr1d2)
NC_000074.6	26979124	26979925	27	3	2.58471	3.29236	4.33845	353310(Zfp703)
NC_000073.6	132930885	132931884	48	5	2.64273	3.90633	6.28613	360216(Zranb1)
NC_000068.7	121448878	121450113	55	7	2.38112	4.19056	6.32405	378702(Serf2)
NC_000076.6	17946970	17948292	59	7	2.46039	4.23019	6.79508	380629(Heca)
NC_000076.6	92809206	92809709	7	0	3.14533	1.57266	3.0103	380654(Cfap54)
NC_000076.6	45485491	45486809	58	16	1.35361	4.76427	3.08659	380669(Lin28b)
NC_000077.6	74522306	74523169	34	8	1.67117	4.00551	3.04994	380711(Rap1gap2)
NC_000078.6	33214306	33214688	7	0	3.14533	1.57266	3.0103	380753(Atxn7l1)
NC_000078.6	109067689	109068487	37	1	3.93559	2.96779	8.0014	380785(Begain)
NC_000080.6	74946654	74948073	39	4	2.67259	3.65822	5.68426	380916(Lrch1)
NC_000081.6	97963819	97964624	21	1	3.30762	2.65381	4.87665	380967(Tmem106c)
NC_000081.6	68257973	68259079	51	3	3.29597	3.64798	8.2507	380993(Zfat)
NC_000083.6	80372802	80374261	65	9	2.24797	4.44591	6.66263	381112(Arhgef33),791338(Gm10190)
NC_000067.6	59119636	59120625	36	5	2.31998	3.74495	4.60319	381259(Tmem237)
NC_000067.6	160905852	160907204	49	11	1.66594	4.41793	3.71899	381305(Rc3h1)
NC_000067.6	36682825	36683510	27	5	1.99975	3.58484	3.24128	381337(Fam178b)
NC_000068.7	73272921	73275048	74	20	1.32445	5.05454	3.66087	381373(Sp9)
NC_000069.6	139221184	139221752	12	1	2.70316	2.35158	3.36932	381476(Stpg2)
NC_000070.6	11321732	11322347	25	5	1.9146	3.54226	3.02404	381510(Dpy19l4)
NC_000070.6	120951450	120952016	32	3	2.77349	3.38675	5.09648	381549(Zfp69)
NC_000071.6	110386259	110387292	28	4	2.3031	3.47348	3.9781	381668(Fbrsl1)
NC_000071.6	110447812	110448758	29	4	2.34205	3.49296	3.9781	381668(Fbrsl1)
NC_000071.6	137032367	137033179	26	5	1.95796	3.56394	3.02404	381677(Vgf)
NC_000072.6	113696975	113697650	19	2	2.61315	2.89154	3.498	381801(Tatdn2)
NC_000073.6	126884499	126885154	17	2	2.4921	2.83101	3.7876	381921(Taok2)
NC_000076.6	4386548	4388472	90	16	1.85149	5.01321	6.39159	381990(Zbtb2)
NC_000074.6	120536980	120538466	66	12	1.88673	4.64381	5.32351	382034(Gse1),74227(1700016A09Rik)
NC_000074.6	70439252	70439999	34	6	2.03374	3.82423	3.87315	382056(Crtc1)
NC_000075.6	120492251	120493014	28	5	2.04007	3.605	3.46164	382114(D830035M03Rik),68969(Eif1b)
NC_000086.7	20425326	20425738	12	1	2.70316	2.35158	3.36932	382207(Jade3)
NC_000078.6	20920702	20921439	28	3	2.62503	3.31252	4.58931	382686(3110053B16Rik),625810(Gm6626)
NC_000083.6	72836303	72837768	82	15	1.83322	4.91661	5.97349	383295(Ypel5)
NC_000068.7	118702573	118704446	67	19	1.28227	4.96306	3.27639	383787(Ankrd63)
NC_000070.6	43957503	43957940	15	2	2.35677	2.76335	3.285	384009(Glipr2)
NC_000074.6	11006706	11007730	48	9	1.90576	4.27481	4.2732	384783(Irs2)
NC_000074.6	11007819	11010082	104	22	1.5798	5.31346	5.83588	384783(Irs2),619321(9530052E02Rik)
NC_000068.7	151494082	151494937	25	3	2.49956	3.24978	4.08961	386649(Nsfl1c)
NC_000073.6	28267465	28268549	29	6	1.85663	3.73567	3.01816	386655(Eid2)
NC_000072.6	54816385	54817560	40	7	2.02289	4.01145	4.28648	387524(Znrf2)
NC_000078.6	112976177	112977235	51	8	2.12604	4.23295	5.13708	399566(Btbd6),72308(Brf1)
NC_000077.6	103697661	103698225	12	1	2.70316	2.35158	3.36932	399609(C130046K22Rik),56494(Gosr2)
NC_000077.6	5444101	5445293	63	9	2.21261	4.42823	6.21277	407821(Znrf3)
NC_000068.7	60209257	60210636	56	9	2.07952	4.36169	5.33213	407823(Baz2b),57438(March7)
NC_000081.6	4026334	4027522	40	9	1.70096	4.17241	3.46696	414066(BC037032),67041(Oxct1)
NC_000071.6	107726294	107727062	30	1	3.70166	2.85083	6.57133	414110(A430072P03Rik)
NC_000080.6	25378006	25378785	28	5	2.04007	3.605	3.46164	414118(Zmiz1os1)
NC_000076.6	117376255	117377271	41	5	2.46562	3.81777	5.3142	432508(Cpsf6)
NC_000081.6	27630033	27630879	43	8	1.9341	4.13698	4.06282	432940(Otulin)
NC_000069.6	52101920	52103432	52	12	1.61741	4.50915	3.75499	433586(Maml3)
NC_000069.6	157947115	157947837	35	3	2.87346	3.43673	5.6101	433667(Ankrd13c)
NC_000070.6	34550618	34551668	44	8	1.95992	4.14989	4.27328	433693(Akirin2)
NC_000073.6	98489615	98490342	25	5	1.9146	3.54226	3.02404	434215(Lrrc32)
NC_000074.6	12430257	12430757	18	2	2.55422	2.86207	3.498	434280(Sox1ot)
NC_000074.6	71558434	71558982	27	5	1.99975	3.58484	3.24128	434325(Tmem221)
NC_000075.6	48495009	48495610	13	1	2.78831	2.39415	3.64039	434402(Gm5617),67010(Rbm7)
NC_000081.6	79833863	79834593	31	6	1.93078	3.77274	3.43979	494448(Cbx6),504193(Npcd)
NC_000078.6	16810643	16811480	29	5	2.07902	3.62447	3.46164	50496(E2f6)
NC_000072.6	99718182	99718462	7	0	3.14533	1.57266	3.0103	50501(Prok2)
NC_000068.7	155050550	155050999	16	1	3.01139	2.50569	4.18809	50518(a)
NC_000080.6	57745214	57746412	55	7	2.38112	4.19056	6.32405	50523(Lats2)
NC_000080.6	45318047	45318989	40	4	2.70096	3.67241	5.93488	50527(Ero1l)
NC_000083.6	63498956	63500747	75	15	1.73199	4.86599	5.18845	50758(Fbxl17)
NC_000080.6	65286193	65286669	12	1	2.70316	2.35158	3.36932	50759(Fbxo16)
NC_000084.6	80829879	80830441	12	1	2.70316	2.35158	3.36932	50771(Atp9b)
NC_000075.6	75409295	75410309	46	6	2.37246	3.99358	5.46362	50772(Mapk6),71274(4933433G15Rik)
NC_000067.6	36068039	36068867	44	11	1.54489	4.35741	3.15925	50785(Hs6st1)
NC_000073.6	63937000	63939514	122	15	2.28516	5.14258	10.4527	50794(Klf13)
NC_000072.6	6058227	6058600	11	0	3.61119	1.8056	3.91339	50799(Slc25a13)
NC_000083.6	74338350	74339491	47	12	1.50356	4.45222	3.20553	50850(Spast)
NC_000075.6	21238346	21239511	57	10	1.962	4.44043	5.10814	50868(Keap1)
NC_000075.6	75503218	75503696	11	1	2.61119	2.3056	3.10048	50875(Tmod3)
NC_000068.7	80580358	80581724	68	18	1.37304	4.93445	3.53754	50884(Nckap1),624223(Gm13688)
NC_000071.6	100038176	100040248	83	20	1.45466	5.11965	4.49741	50926(Hnrnpdl),67870(Enoph1)
NC_000080.6	101653617	101654698	33	7	1.80779	3.9039	3.23081	50933(Uchl3)
NC_000073.6	34160425	34160919	13	1	2.78831	2.39415	3.64039	50995(Uba2)
NC_000070.6	135352426	135353590	42	10	1.61818	4.26852	3.30472	51796(Srrm1)
NC_000069.6	152210551	152211333	33	5	2.22283	3.69638	4.13933	51886(Fubp1)
NC_000083.6	24960244	24960953	22	1	3.3587	2.67935	5.157	52009(Jpt2)
NC_000076.6	52417308	52418168	33	6	2.00044	3.80757	3.6551	52014(Nus1)
NC_000083.6	30989972	30990613	20	2	2.66921	2.91957	3.75443	52020(Umodl1)
NC_000085.6	3575040	3575972	35	4	2.55154	3.5977	4.94184	52036(Ppp6r3)
NC_000074.6	18846047	18847128	34	5	2.25613	3.71303	4.37016	52123(Agpat5)
NC_000069.6	145118692	145118964	11	0	3.61119	1.8056	3.91339	52184(Odf2l)
NC_000072.6	71707629	71708336	32	3	2.77349	3.38675	5.09648	52250(Reep1)
NC_000071.6	24100344	24101261	34	8	1.67117	4.00551	3.04994	52323(Klhl7)
NC_000074.6	109737303	109737984	27	5	1.99975	3.58484	3.24128	52335(Atxn1l)
NC_000073.6	35333858	35334571	26	4	2.221	3.43243	3.51	52428(Rhpn2)
NC_000073.6	138846138	138847083	38	5	2.38047	3.7752	4.83828	52432(Ppp2r2d),69546(Mapk1ip1)
NC_000080.6	40966443	40967397	37	5	2.35062	3.76027	4.83828	52588(Tspan14)
NC_000081.6	37569045	37569550	18	0	4.13918	2.06959	5.71957	52589(Ncald)
NC_000077.6	51967360	51967948	18	1	3.13918	2.56959	4.74185	52626(Cdkn2aipnl)
NC_000076.6	71344415	71345055	27	4	2.26278	3.45332	3.74275	52637(Cisd1)
NC_000084.6	67932834	67934230	54	8	2.19049	4.26517	5.58075	52662(Ldlrad4)
NC_000076.6	60002676	60003267	20	2	2.66921	2.91957	3.75443	52717(Anapc16),69090(Ascc1)
NC_000068.7	180070256	180070952	26	1	3.54293	2.77146	5.72042	52856(Mtg2)
NC_000076.6	20952136	20953131	45	6	2.34775	3.98123	5.46362	52906(Ahi1)
NC_000077.6	6388900	6389829	44	7	2.12985	4.06492	4.72589	52915(Zmiz2)
NC_000071.6	24685539	24686287	37	6	2.12823	3.87147	4.3168	53312(Nub1)
NC_000071.6	65536908	65538083	43	9	1.7821	4.21298	3.66464	53323(Ube2k),68552(Smim14)
NC_000074.6	121950131	121951281	32	2	3.18853	3.17923	5.87024	53325(Banp)
NC_000067.6	162570482	162571064	26	3	2.54293	3.27146	4.08961	53330(Vamp4)
NC_000068.7	74825486	74826350	27	3	2.58471	3.29236	4.33845	53375(Mtx2)
NC_000084.6	63691983	63692688	25	5	1.9146	3.54226	3.02404	53382(Txnl1)
NC_000073.6	49778202	49779021	35	2	3.2885	3.22921	6.41235	53415(Htatip2),71974(Prmt3)
NC_000072.6	88518511	88519063	16	3	2.01139	3.00569	3.03428	53421(Sec61a1)
NC_000076.6	111473026	111473989	48	12	1.52725	4.46407	3.20553	53605(Nap1l1)
NC_000070.6	133240908	133241546	20	3	2.25417	3.12709	3.11807	53608(Map3k6)
NC_000070.6	43875208	43875929	22	2	2.77374	2.97183	4.27364	53614(Reck)
NC_000078.6	77238033	77239414	60	9	2.15745	4.40065	5.99013	53618(Fut8)
NC_000077.6	117325805	117326581	20	3	2.25417	3.12709	3.11807	53860(Sept9)
NC_000069.6	108415338	108416162	27	4	2.26278	3.45332	3.74275	53883(Celsr2)
NC_000077.6	85310984	85311933	23	4	2.08567	3.36476	3.05312	53892(Ppm1d)
NC_000070.6	135433458	135434105	46	8	2.00989	4.17487	4.48604	53902(Rcan3)
NC_000069.6	105687547	105688048	21	1	3.30762	2.65381	4.87665	53975(Ddx20)
NC_000069.6	105686890	105687499	26	3	2.54293	3.27146	4.08961	53975(Ddx20)
NC_000069.6	152151705	152152274	16	2	2.42642	2.79817	3.53488	54120(Gipc2)
NC_000074.6	11727458	11728938	64	13	1.745	4.67985	4.74362	54126(Arhgef7)
NC_000081.6	76656238	76657206	39	9	1.67259	4.15822	3.2721	54151(Cyhr1)
NC_000080.6	21500783	21501489	25	5	1.9146	3.54226	3.02404	54169(Kat6b)
NC_000070.6	123916869	123918230	49	13	1.44355	4.52913	3.08052	54170(Rragc)
NC_000071.6	145167067	145167622	15	1	2.94173	2.47087	3.91339	54188(Cpsf4),71799(Ptcd1)
NC_000076.6	42501747	42502830	38	9	1.6435	4.14368	3.08023	54198(Snx3)
NC_000071.6	57803132	57803550	8	0	3.28066	1.64033	3.31133	54216(Pcdh7)
NC_000071.6	105876096	105877197	59	13	1.65303	4.63387	4.16805	54367(Zfp326)
NC_000068.7	163994805	163995968	50	11	1.68869	4.42931	3.91087	54401(Ywhab)
NC_000074.6	107293164	107294459	58	12	1.74064	4.57076	4.32705	54446(Nfat5)
NC_000077.6	103359992	103360956	34	5	2.25613	3.71303	4.37016	544817(Arhgap27)
NC_000072.6	39419460	39420528	45	9	1.83317	4.23851	4.06789	54484(Mkrn1),621427(Gm10244)
NC_000085.6	42987270	42987633	9	0	3.40171	1.70086	3.61236	545291(Hpse2)
NC_000067.6	173534165	173534540	8	0	3.28066	1.64033	3.31133	545384(Ifi214)
NC_000067.6	176813423	176814150	30	6	1.8943	3.75451	3.22741	545389(Cep170)
NC_000068.7	152092898	152094177	41	7	2.05058	4.02529	4.28648	545474(Scrt2)
NC_000072.6	91116251	91117100	39	3	2.99452	3.49726	6.39086	54563(Nup210)
NC_000070.6	145464012	145464607	27	4	2.26278	3.45332	3.74275	545700(Smarca5-ps)
NC_000080.6	65097572	65098488	29	5	2.07902	3.62447	3.46164	54616(Extl3)
NC_000080.6	30715280	30716634	84	18	1.61265	5.05425	5.11121	54650(Sfmbt1)
NC_000080.6	50889695	50890254	11	1	2.61119	2.3056	3.10048	546611(Klhl33)
NC_000069.6	144719553	144720753	50	5	2.68869	3.92931	6.7808	54673(Sh3glb1)
NC_000075.6	47529768	47530648	29	0	4.66398	2.33199	NA	54725(Cadm1)
NC_000075.6	47530798	47531925	38	6	2.15808	3.88639	4.3168	54725(Cadm1)
NC_000081.6	44619056	44619711	28	3	2.62503	3.31252	4.58931	55960(Ebag9)
NC_000075.6	15044822	15045633	22	4	2.03677	3.34031	3.05312	55991(Panx1)
NC_000077.6	97531730	97532172	14	2	2.28262	2.72627	3.285	56013(Srcin1)
NC_000073.6	101320922	101321819	49	13	1.44355	4.52913	3.08052	56018(Stard10)
NC_000067.6	36938725	36940269	58	14	1.53418	4.67398	3.65981	56030(Tmem131)
NC_000079.6	17943546	17944481	33	5	2.22283	3.69638	4.13933	56044(Rala)
NC_000083.6	46160843	46161363	19	2	2.61315	2.89154	3.498	56055(Gtpbp2)
NC_000068.7	30065956	30067646	98	21	1.57633	5.2476	5.60897	56086(Set)
NC_000071.6	124779296	124779978	21	2	2.72266	2.94629	4.01305	56087(Dnah10)
NC_000081.6	101231510	101232243	24	3	2.4545	3.22725	3.84294	56149(Grasp)
NC_000068.7	28205297	28206233	30	6	1.8943	3.75451	3.22741	56177(Olfm1)
NC_000079.6	24831231	24832425	65	10	2.11046	4.51466	6.18153	56196(Tdp2),66834(Acot13)
NC_000067.6	38128823	38130185	57	13	1.61408	4.61439	3.98059	56210(Rev1)
NC_000073.6	102249533	102250541	61	15	1.49806	4.74903	3.70969	56212(Rhog)
NC_000073.6	130936006	130936915	36	7	1.90494	3.95247	3.645	56213(Htra1)
NC_000078.6	78748555	78749498	29	6	1.85663	3.73567	3.01816	56217(Mpp5)
NC_000077.6	3289771	3290697	46	12	1.47937	4.44013	3.02796	56218(Patz1)
NC_000085.6	29047315	29048186	35	8	1.70354	4.02169	3.04994	56248(Ak3),67329(1700018L02Rik)
NC_000079.6	58273513	58274723	54	13	1.55306	4.58388	3.61279	56278(Gkap1)
NC_000068.7	26628150	26628809	25	2	2.9146	3.04226	4.80008	56279(Fam69b)
NC_000075.6	107551371	107552050	21	1	3.30762	2.65381	4.87665	56289(Rassf1)
NC_000075.6	121857079	121858226	54	8	2.19049	4.26517	5.58075	56295(Higd1a)
NC_000071.6	111330490	111331186	26	3	2.54293	3.27146	4.08961	56305(Pitpnb)
NC_000077.6	84513141	84513786	21	3	2.30762	3.15381	3.35694	56321(Aatf)
NC_000070.6	42949653	42950473	25	4	2.17764	3.41075	3.51	56323(Dnajb5)
NC_000068.7	52741650	52742574	23	4	2.08567	3.36476	3.05312	56324(Stam2)
NC_000085.6	6140622	6141280	23	3	2.4076	3.2038	3.59865	56327(Arl2)
NC_000085.6	46572863	46573399	20	1	3.25417	2.62709	4.59735	56350(Arl3),94279(Sfxn2)
NC_000076.6	128058648	128059780	43	9	1.7821	4.21298	3.66464	56351(Ptges3)
NC_000074.6	83441914	83442767	32	5	2.18853	3.67923	3.91086	56367(Scoc)
NC_000070.6	141537524	141539024	75	19	1.41006	5.02696	3.93019	56381(Spen)
[truncated: 724 more rows]
