# Supplementary material for: Zinc finger protein Zfp335 controls early T-cell development and survival through β-selection-dependent and -independent mechanisms
Source: eLife. 2022 Feb 3;11:e75508. doi: 10.7554/eLife.75508 (PMC8871394; doi:10.7554/eLife.75508)
Supplement: Supplementary file 3. [file elife-75508-supp3.xlsx]

## Sheet: Sheet1
AccID	log2FC	Pvalue	FDR	WT1_count	WT2_count	KO1_count	KO2_count	WT1_RPKM	WT2_RPKM	KO1_RPKM	KO2_RPKM	chr	start	end	#raw_read_1	#raw_read_2	M_value_rescaled	A_value_rescaled	#NAME?	gene id(symbol)
Nup205	-1.15152	1.43e-28	1.46e-25	6398	6828	3110	2751	56.4597	52.5268	25.9815	25.3804	NC_000072.6	35177172	35178338	59	10	2.00095	4.45991	5.3193	70699(Nup205)
Psmg2	-2.087	2.67e-25	1.64e-22	823	988	248	171	44.433	46.5004	12.6756	9.65198	NC_000084.6	67640919	67641722	38	5	2.38047	3.7752	4.83828	107047(Psmg2),225659(Cep76)
Dctn1	-2.6625	3.62e-62	4.45e-58	3431	3913	683	460	31.7831	31.5995	5.98973	4.455	NC_000072.6	83165594	83166261	26	5	1.95796	3.56394	3.02404	13191(Dctn1)
Zfp335	-2.61622	9.55e-47	5.87e-43	1481	1562	290	200	17.6517	16.2296	3.27221	2.49216	NC_000068.7	164911073	164911865	29	6	1.85663	3.73567	3.01816	329559(Zfp335),629777(Zfp335os)
Ankle2	-2.17409	1.1e-43	3.39e-40	1205	1307	279	268	13.1004	12.3871	2.87153	3.04613	NC_000071.6	110230735	110231587	32	5	2.18853	3.67923	3.91086	71782(Ankle2)
Cep76	-1.81068	2.13e-19	5.68e-17	1013	1030	344	232	13.4411	11.914	4.3211	3.21831	NC_000084.6	67640919	67641722	38	5	2.38047	3.7752	4.83828	107047(Psmg2),225659(Cep76)
Fgf13	-1.8058	6.02e-15	9.13e-13	534	538	176	127	11.5517	10.1457	3.60436	2.87225	NC_000086.7	59133856	59135188	35	1	3.87346	2.93673	7.42783	14168(Fgf13)
Dph6	-2.19199	6.34e-23	2.78e-20	545	550	119	117	11.4181	10.0451	2.36024	2.5627	NC_000068.7	114560798	114561326	20	1	3.25417	2.62709	4.59735	66632(Dph6)
Ddx31	-1.08631	1.3e-09	1.09e-07	616	696	323	284	10.5828	10.4237	5.25329	5.10095	NC_000068.7	28840546	28840966	16	0	4.01139	2.00569	5.11751	227674(Ddx31)
Habp4	-1.58161	1.77e-06	8.07e-05	168	198	65	55	3.74184	3.84446	1.37057	1.28072	NC_000079.6	64161664	64162680	42	6	2.27026	3.94248	4.99902	56541(Habp4)
Tbck	-1.16023	4.39e-07	2.25e-05	376	382	171	163	3.1712	2.80862	1.36535	1.43727	NC_000069.6	132683911	132684425	15	2	2.35677	2.76335	3.285	271981(Tbck)
Bcl6	-1.38423	4.87e-05	0.00147705	244	321	143	70	2.70622	3.10365	1.50148	0.811681	NC_000082.6	23987677	23989088	63	11	1.94958	4.55975	5.31705	102633785(Gm31527),12053(Bcl6)
Tmcc3	-1.19223	7.24e-06	0.000282255	309	318	158	113	3.04078	2.72802	1.47195	1.16257	NC_000076.6	94533476	94533979	11	1	2.61119	2.3056	3.10048	319880(Tmcc3)
Cmtm4	-1.26416	2.75e-08	1.78e-06	351	408	162	148	2.59481	2.62937	1.13377	1.14386	NC_000074.6	104395077	104396088	47	9	1.88207	4.26296	4.2732	97487(Cmtm4)
Tesc	-1.41342	0.0329691	0.265518	39	56	24	11	2.16276	2.70723	1.25998	0.637749	NC_000071.6	118027300	118028823	57	15	1.42143	4.71072	3.36246	57816(Tesc)
Zfp335os	-3.67034	5.58e-09	4.13e-07	95	111	13	3	1.99543	2.0325	0.258504	0.0658793	NC_000068.7	164911073	164911865	29	6	1.85663	3.73567	3.01816	329559(Zfp335),629777(Zfp335os)
Hoxa4	-1.31922	0.0471522	0.329502	30	63	21	15	1.12254	2.05501	0.743889	0.586792	NC_000072.6	52190994	52192164	72	13	1.87836	4.74654	5.53877	15400(Hoxa3),15401(Hoxa4)
Agap1	-1.19547	0.00283452	0.0466158	106	121	44	53	0.632553	0.629463	0.248573	0.33066	NC_000067.6	89454286	89455574	50	10	1.81423	4.36654	4.28341	347722(Agap1)
Macrod2	-1.24498	0.0284533	0.24207	47	62	25	20	0.549979	0.632461	0.276948	0.244677	NC_000068.7	140395116	140396192	52	12	1.61741	4.50915	3.75499	72899(Macrod2)
Fam171a1	-1.87759	0.0342097	0.269707	29	23	6	8	0.399918	0.2765	0.0783311	0.115339	NC_000068.7	3118116	3119088	53	13	1.53198	4.57334	3.43266	269233(Fam171a1)
Grrp1	-3.3094	0.0492904	1	11	9	1	1	0.347469	0.247833	0.0299043	0.0330246	NC_000070.6	134251107	134252376	45	9	1.83317	4.23851	4.06789	72690(Grrp1)
Elavl3	-2.17071	0.0332112	1	21	20	5	4	0.238843	0.198297	0.0538361	0.0475628	NC_000075.6	22050299	22051351	44	10	1.67042	4.29464	3.4952	15571(Elavl3)
