# Supplementary material for: Zinc finger protein Zfp335 controls early T-cell development and survival through β-selection-dependent and -independent mechanisms
Source: eLife. 2022 Feb 3;11:e75508. doi: 10.7554/eLife.75508 (PMC8871394; doi:10.7554/eLife.75508)
Supplement: Supplementary file 4. [file elife-75508-supp4.xlsx]

## Sheet: Sheet1
Primers used for quantitative PCR
Genes	Forward	Reverse
Actin	ATCTGGCACCACACCTTCTACA	ACGTACATGGCTGGGGTGTT
Ankle2	CCTATACTCTCATCTGCCACG	ATCTGTGGATTGCTGGGTAC
Bcl6	GGAAACCCAGTCAGAGTATTCG	GGCAGCGATCACATTTGTATG
CD3e	TGGAGCAAGAATAGGAAGGC	CATAGTCTGGGTTGGGAACAG
Cep76	TTAGTTGCGTCCTATTTCCTGG	AGCGGTGGGTACATTTCAAG
Dctn1	CTGGATGAGACTGTCAACGTG	TCTGGGTGAACTTGATGTGG
Ddx31	CAGAAGCAGAGTATCCCAGTG	AAGCATACGGTCCATCACTG
Dph6	ATGTGAAGGTGACGAGGTTG	GGCTGGAGATTGAGTCGTTTAC
Fgf13	AAAGACGAGGACAGCACTTAC	AGGTGTGAAATGTTCCGAGG
Habp4	GAGGGAAACGAGACTTTGAGAG	CTAGTGTCTTTACCTGATCCCC
Nup205	GAACCAGCACGATATAGACCAG	AGCCTGGATGAAACTATAGCG
Psmg2	AGCCATTCGTATCACCGC	GCACCGACTCTTTTCCATTTC
Ptcra	GAATCTTCGACAGCCAGGAG	CAGGTCAGGAGCACATCG
Rorc	TTTCTGAGGATGAGATTGCCC	TTGTCGATGAGTCTTGCAGAG
Tbck	CGCCTTCCATGATCCAGAG	CCGAGCAGTAATGTATCCCAG
Trbc1	ACAGAACATCAGTGCAGAGG	TTCCCCAGTAGGATCTCATAGAG
Trbc2	ACAGAACATCAGTGCAGAGG	TGACAAGCACAGCATACAGG
Zfp335	CAGGATTAACGGAGGCTGAC	GAAGATGAATCAGGGAGGCAG
