# Supplementary figures and images for: Zinc finger protein Zfp335 controls early T-cell development and survival through β-selection-dependent and -independent mechanisms
Source: eLife journal article supplement (doi:10.7554/elife.75508), 2022-02-03

Figure 5—figure supplement 4

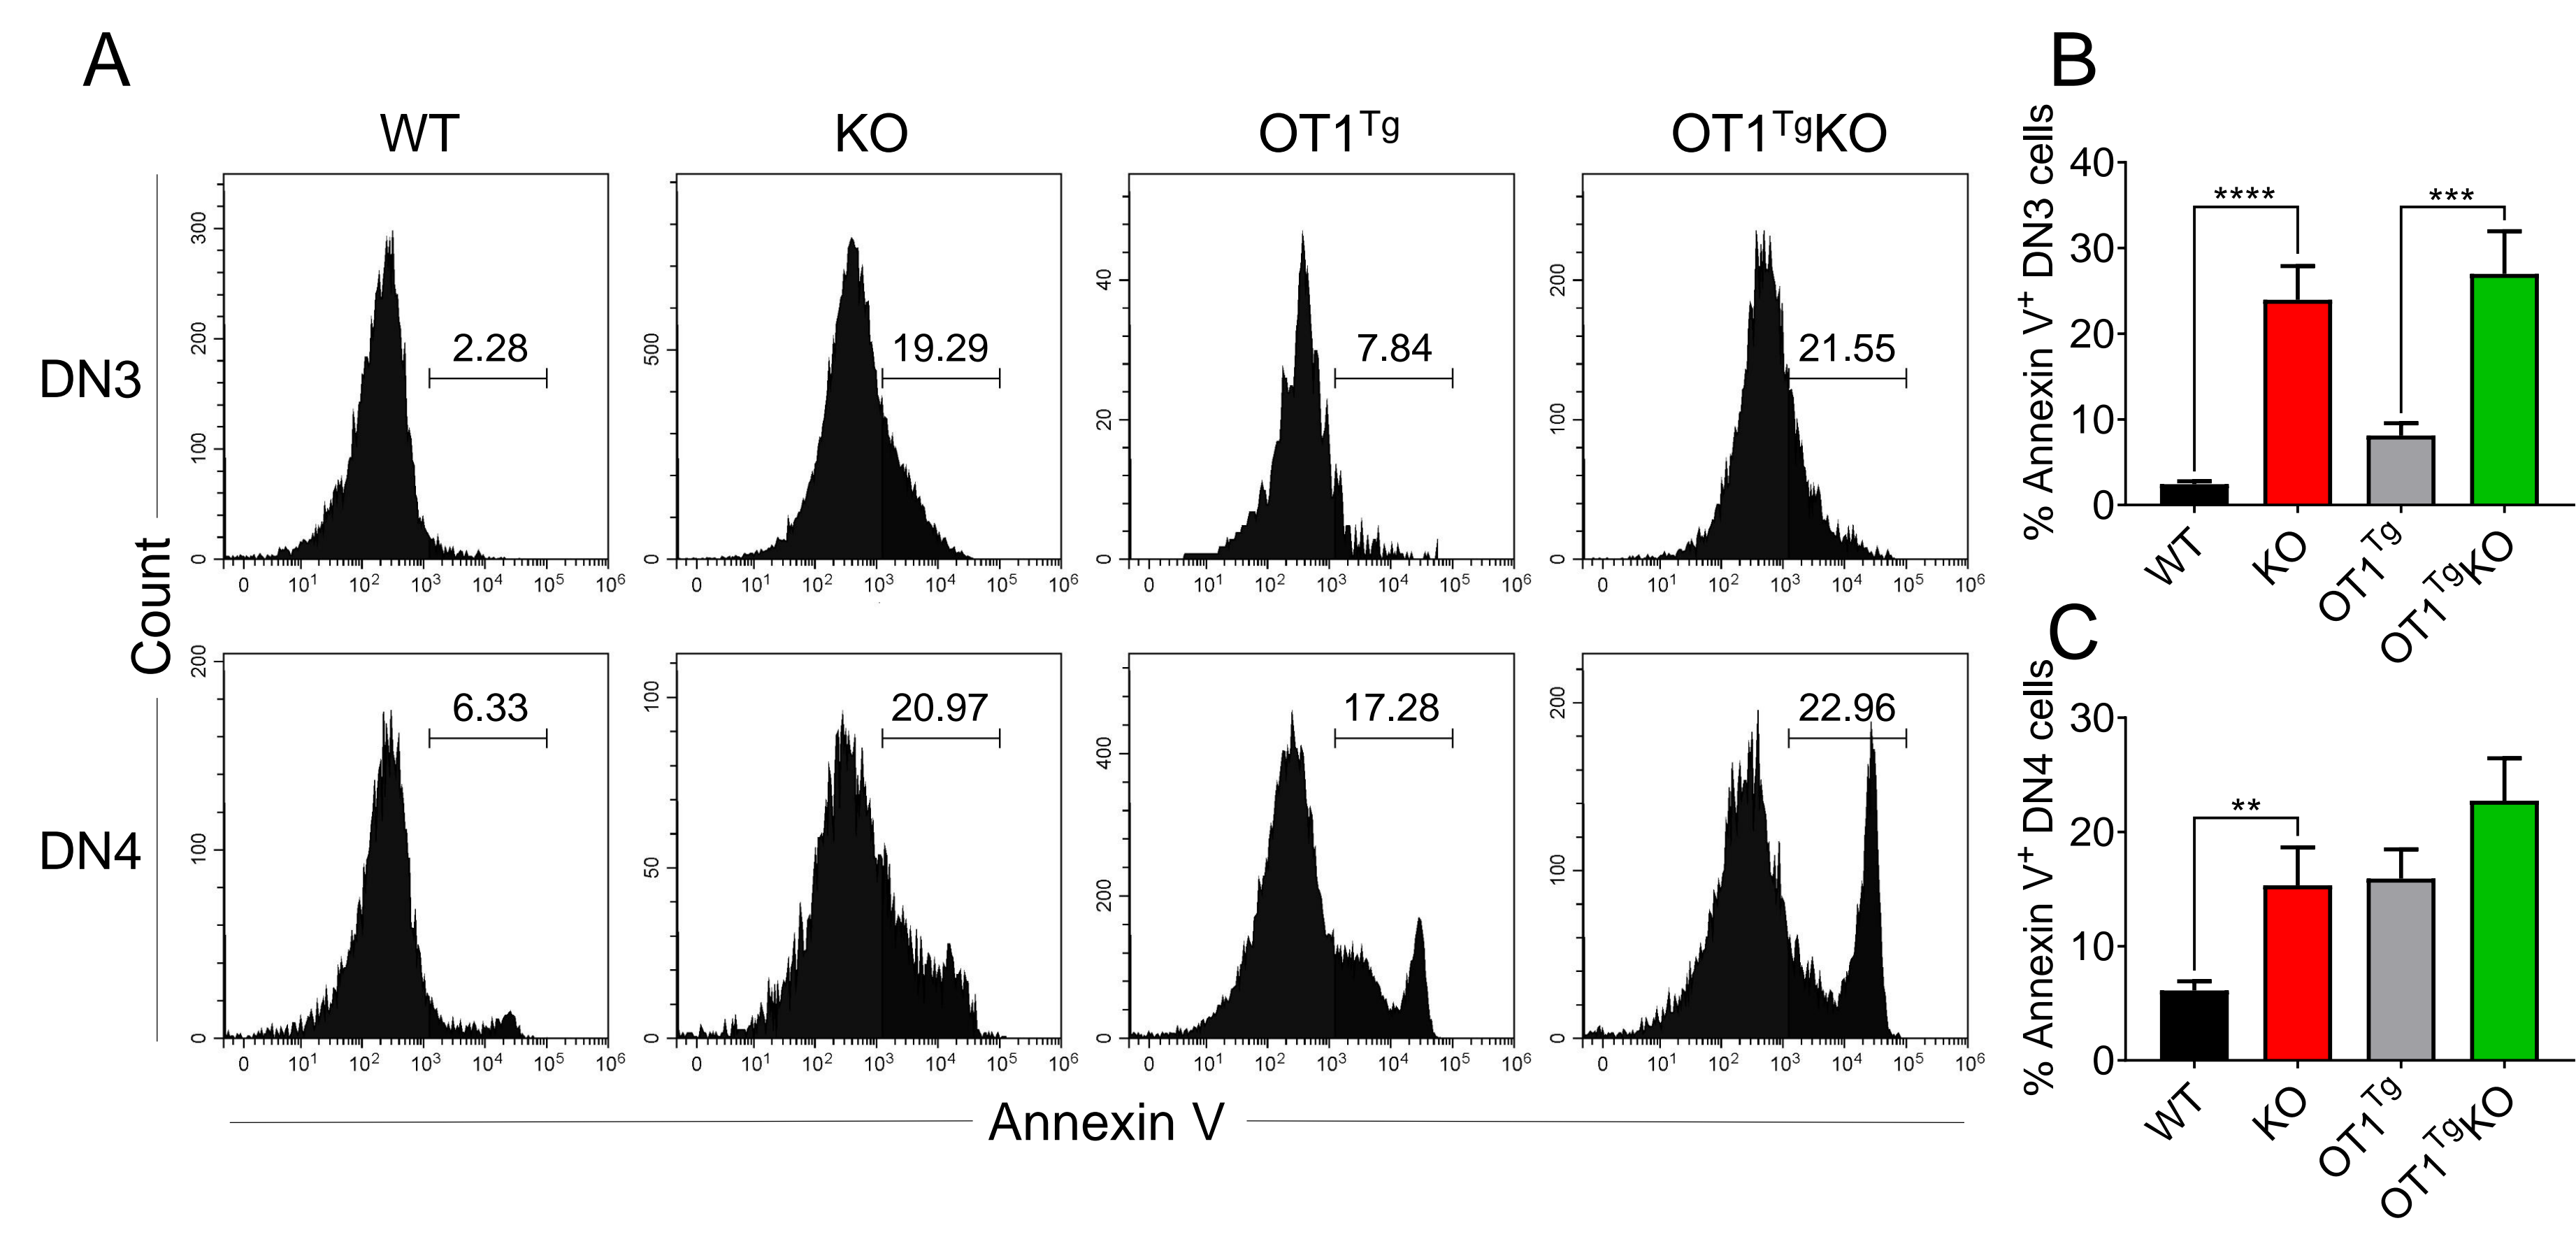

Supplement: supp [file elife-75508-supp-v1.zip]

Figure 5—figure supplement 5

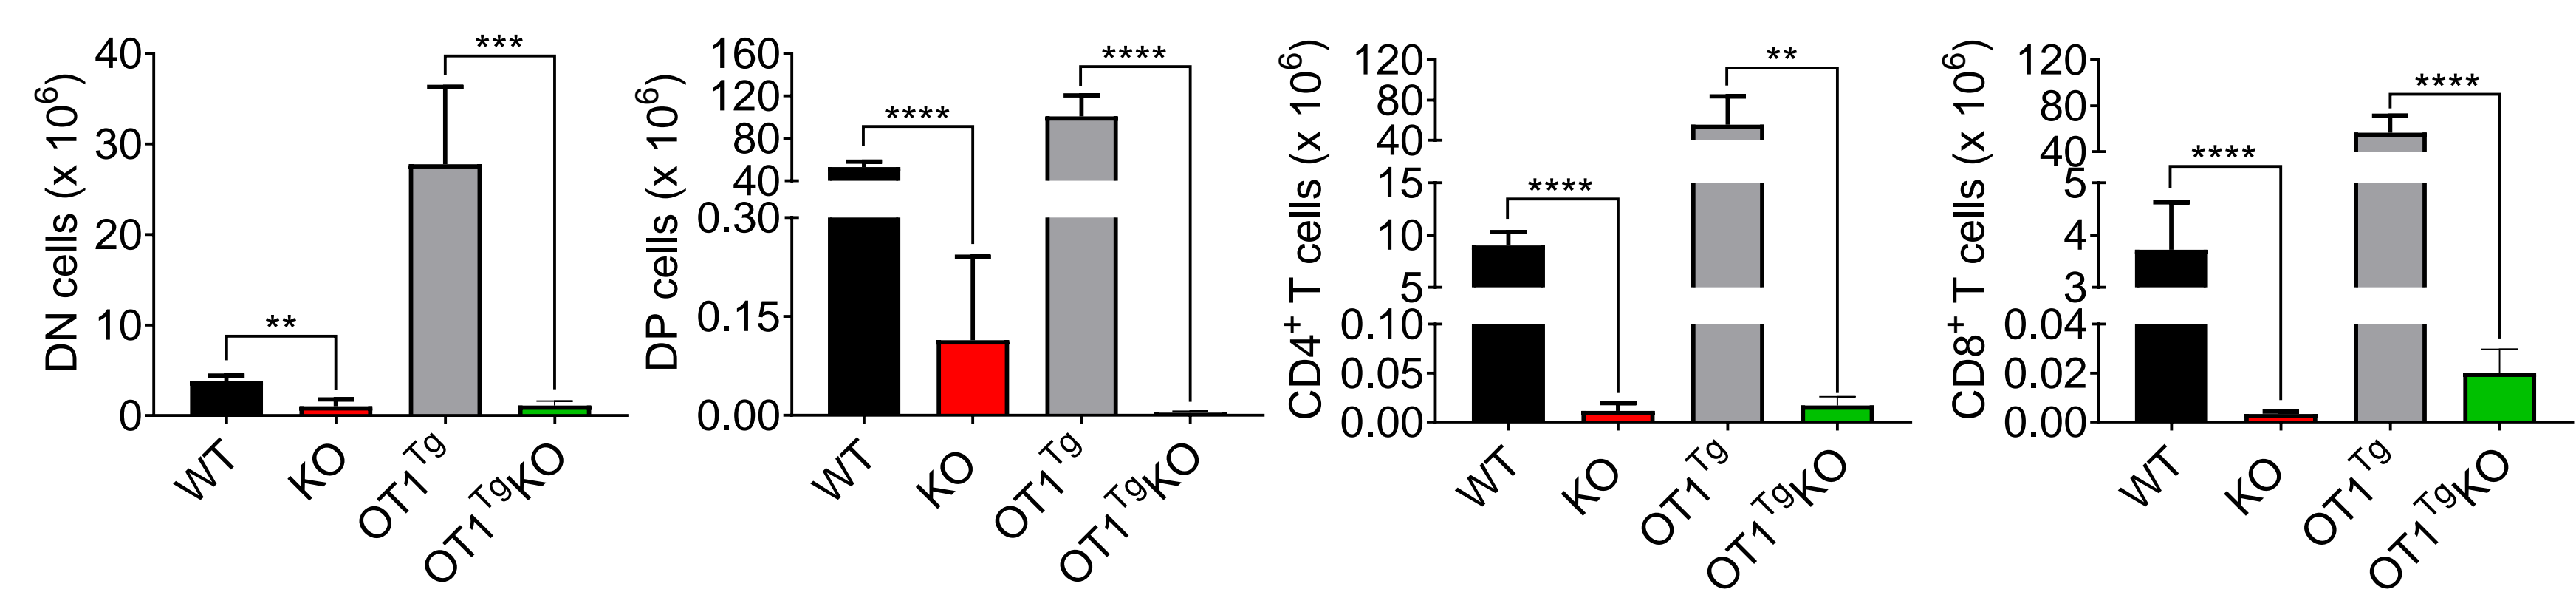

Supplement: supp [file elife-75508-supp-v1.zip]

Figure 7—figure supplement 3

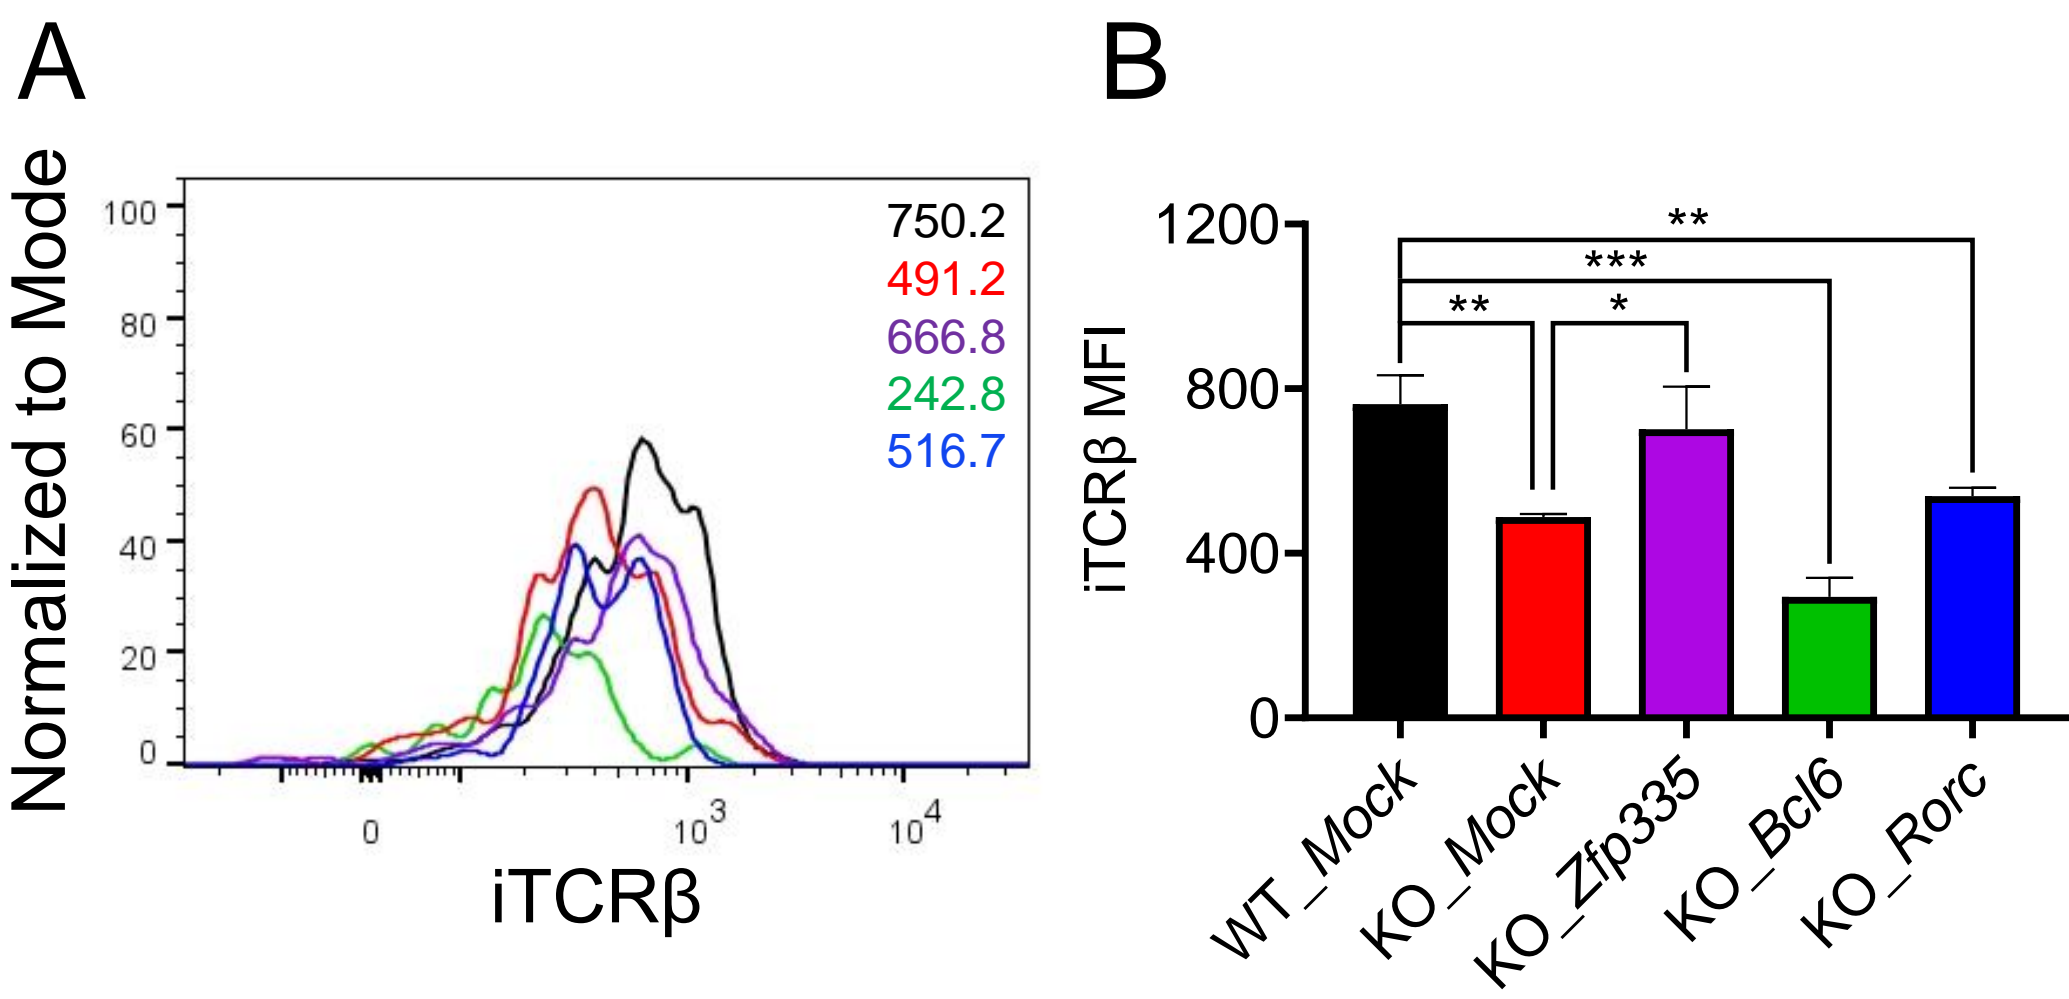

Supplement: supp [file elife-75508-supp-v1.zip]

Figure 1—figure supplement 1

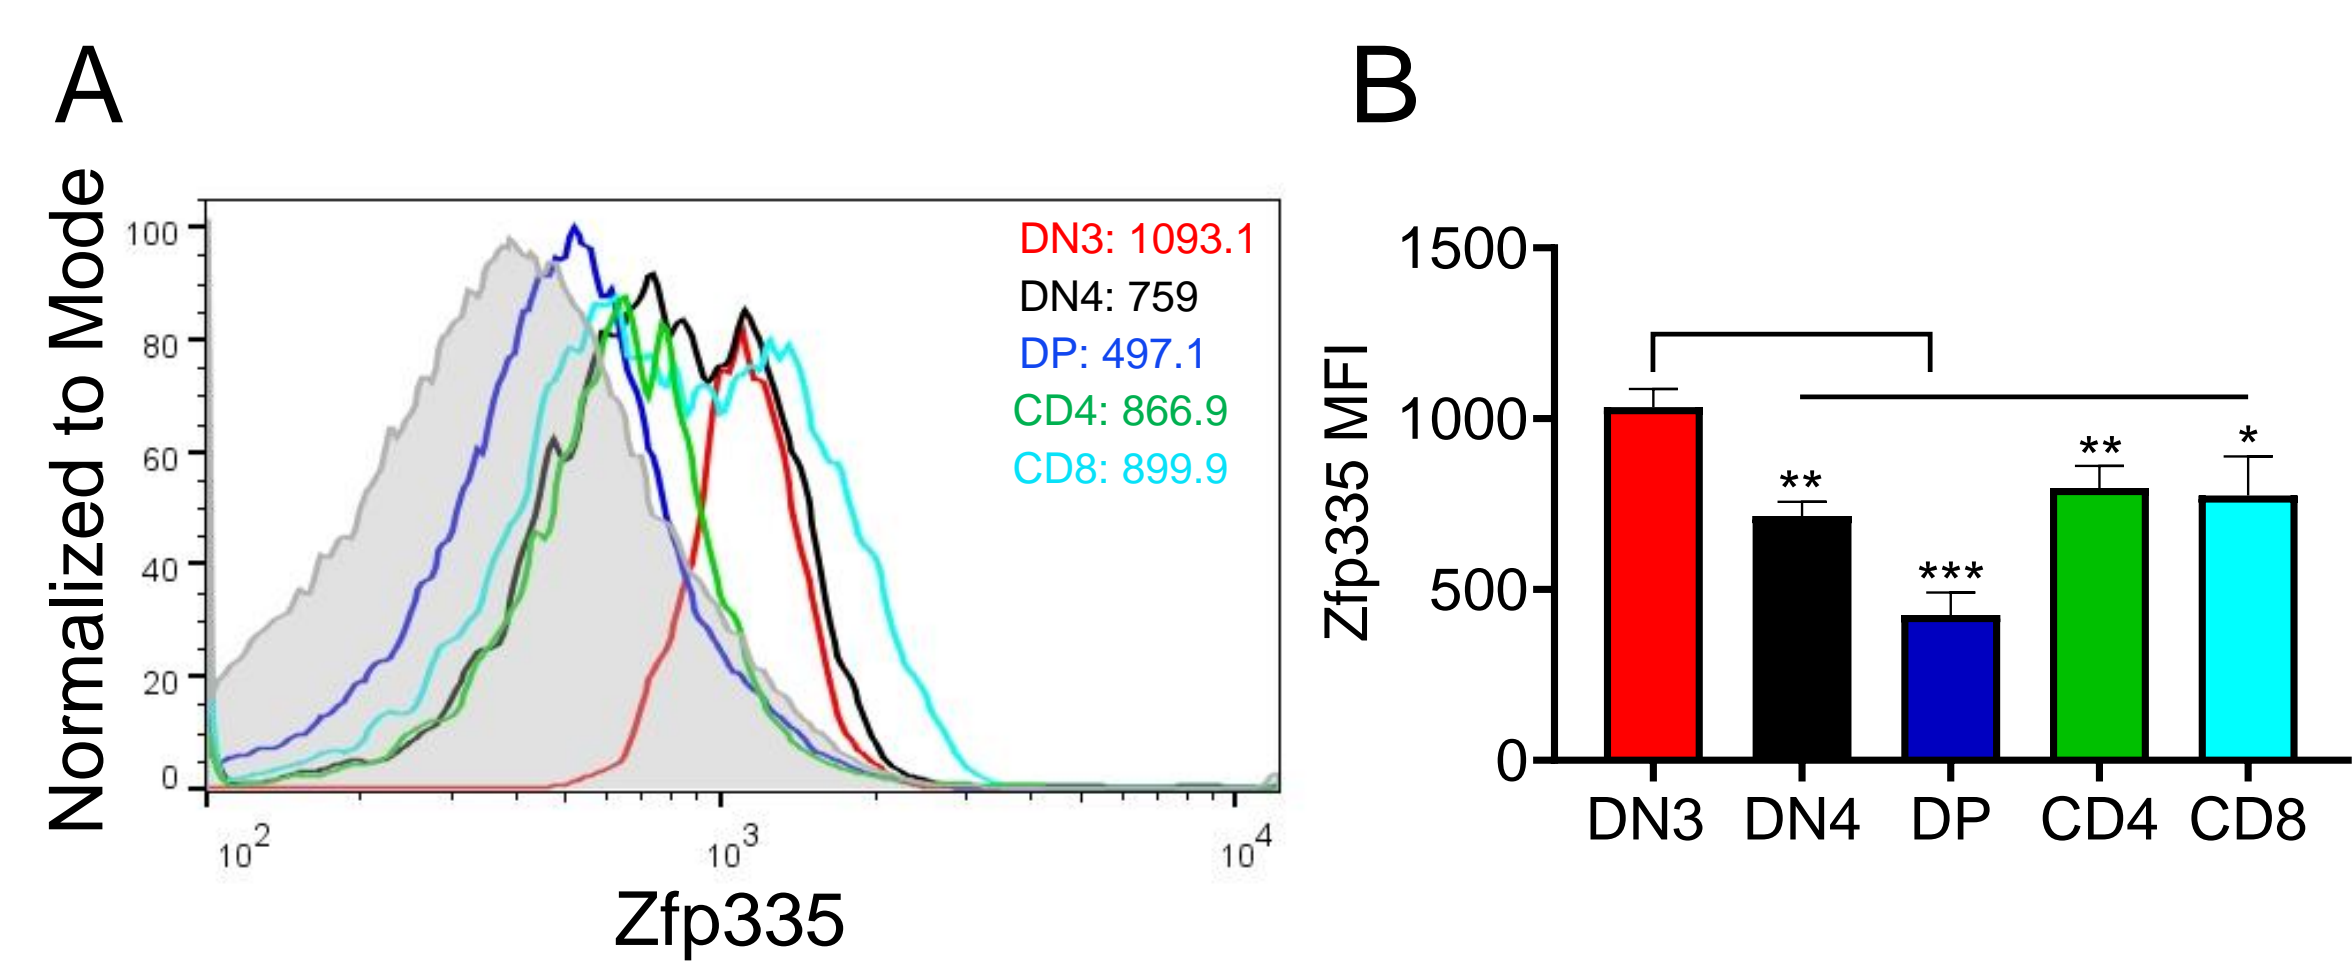

Supplement: supp [file elife-75508-supp-v1.zip]

Figure 2—figure supplement 2

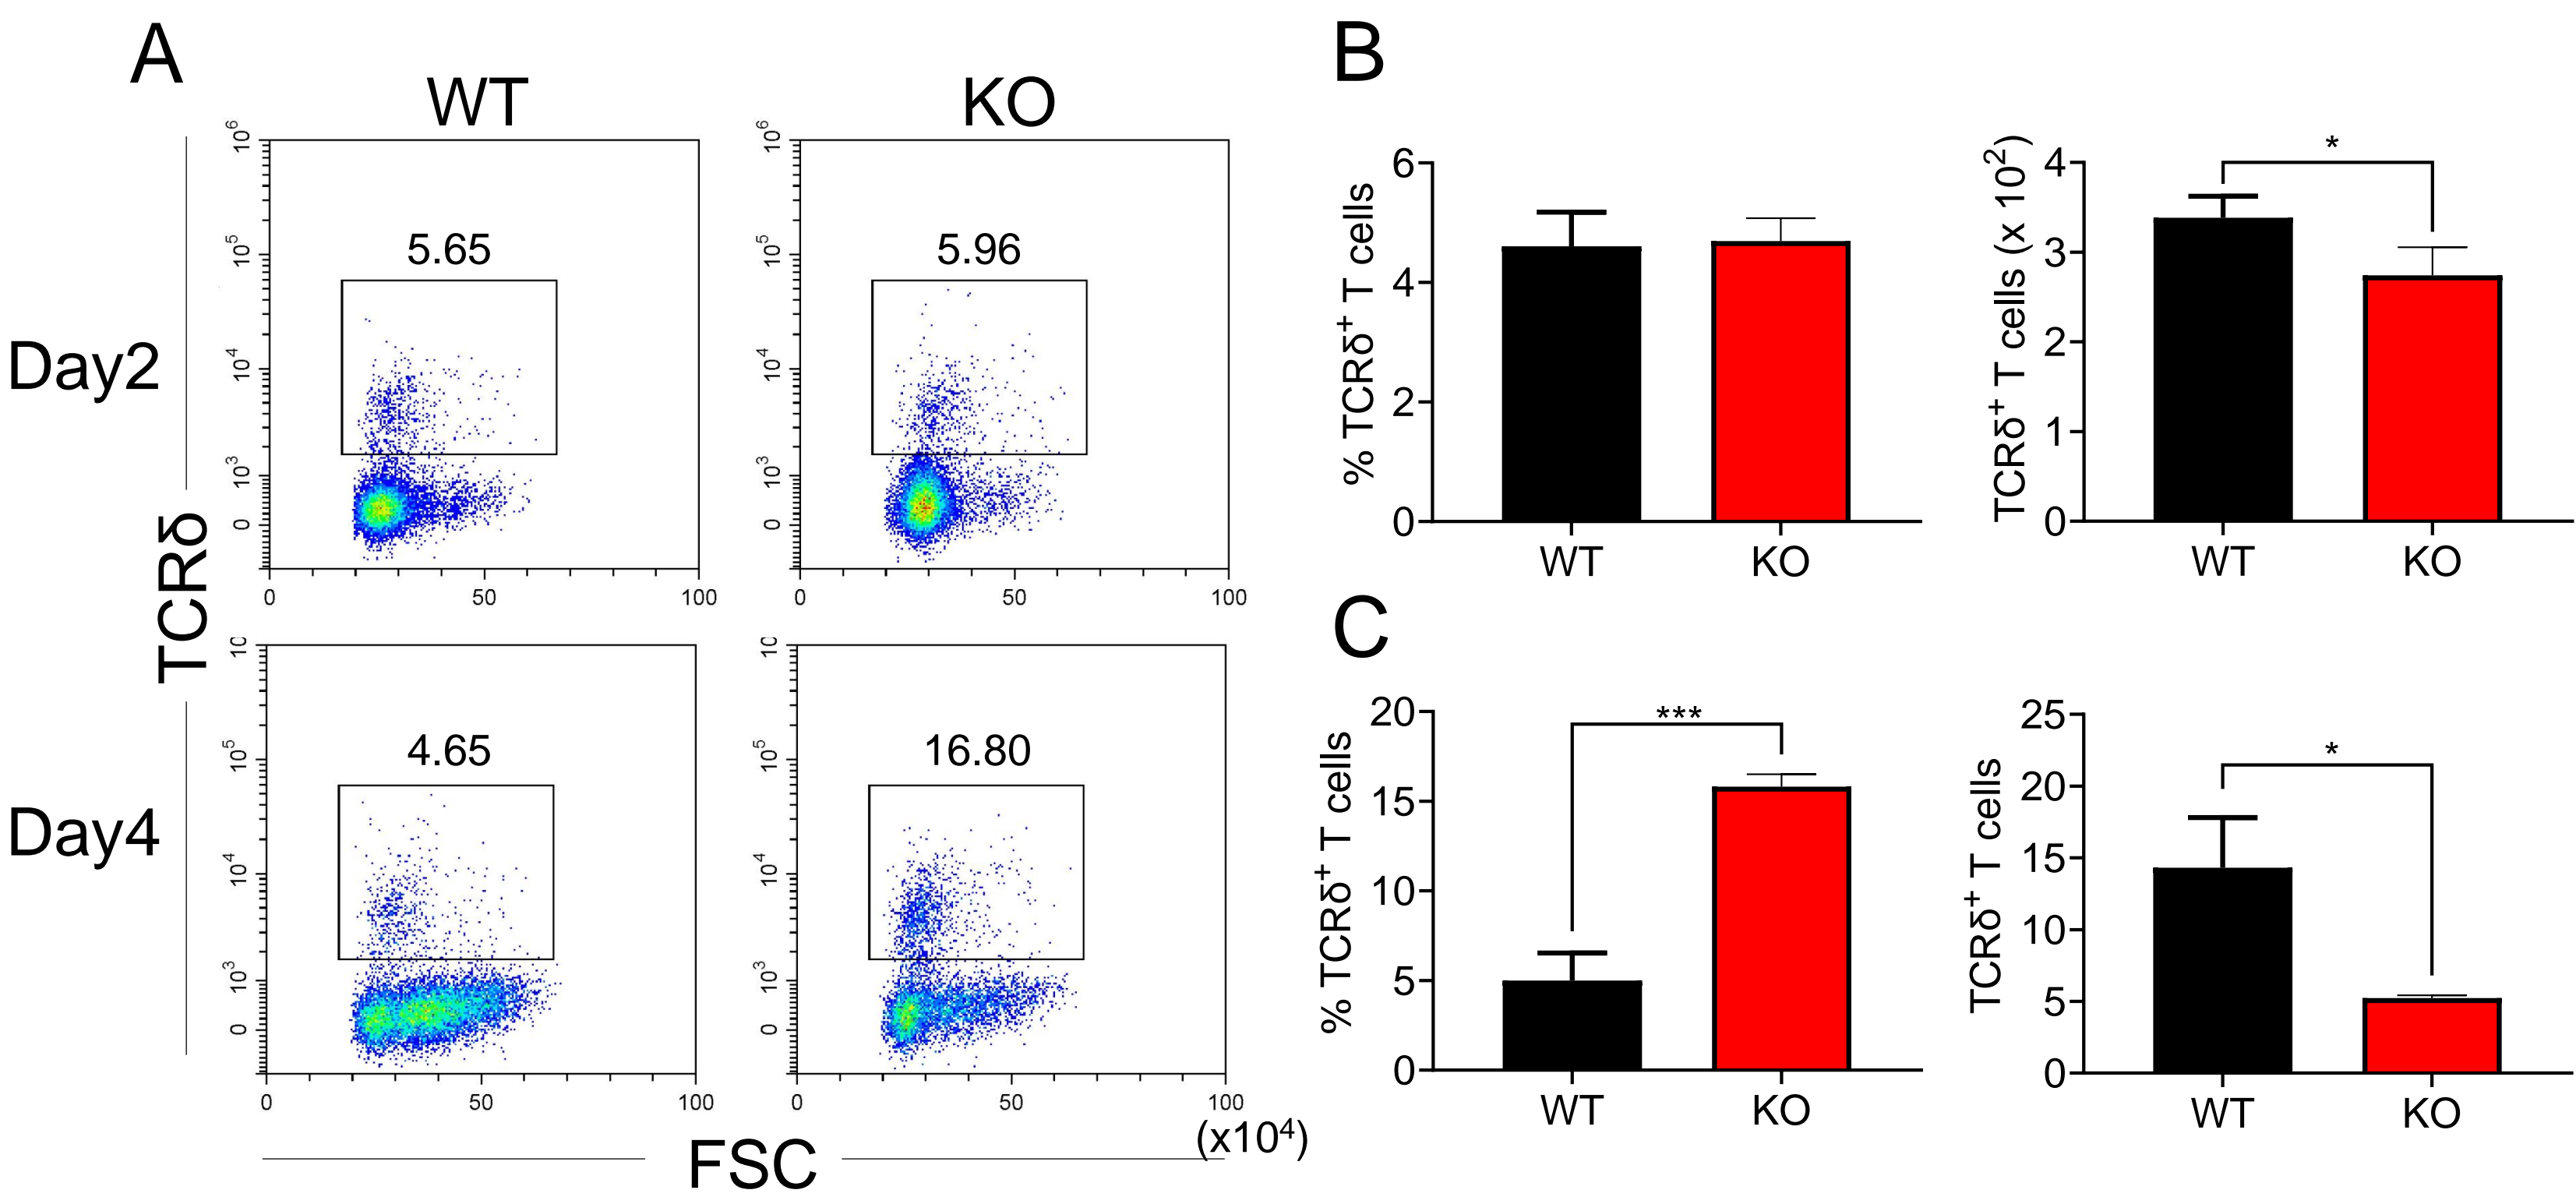

Supplement: supp [file elife-75508-supp-v1.zip]

Figure 6—figure supplement 1

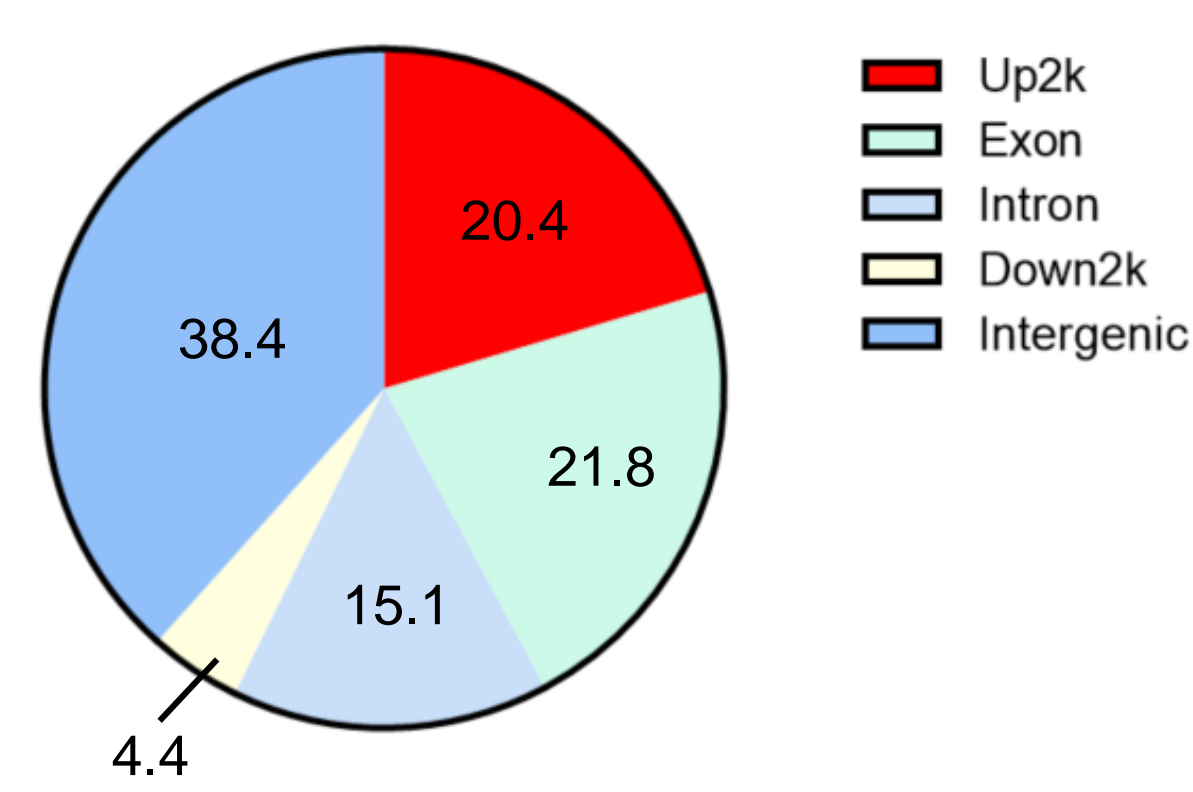

Supplement: supp [file elife-75508-supp-v1.zip]

Figure 1—figure supplement 3

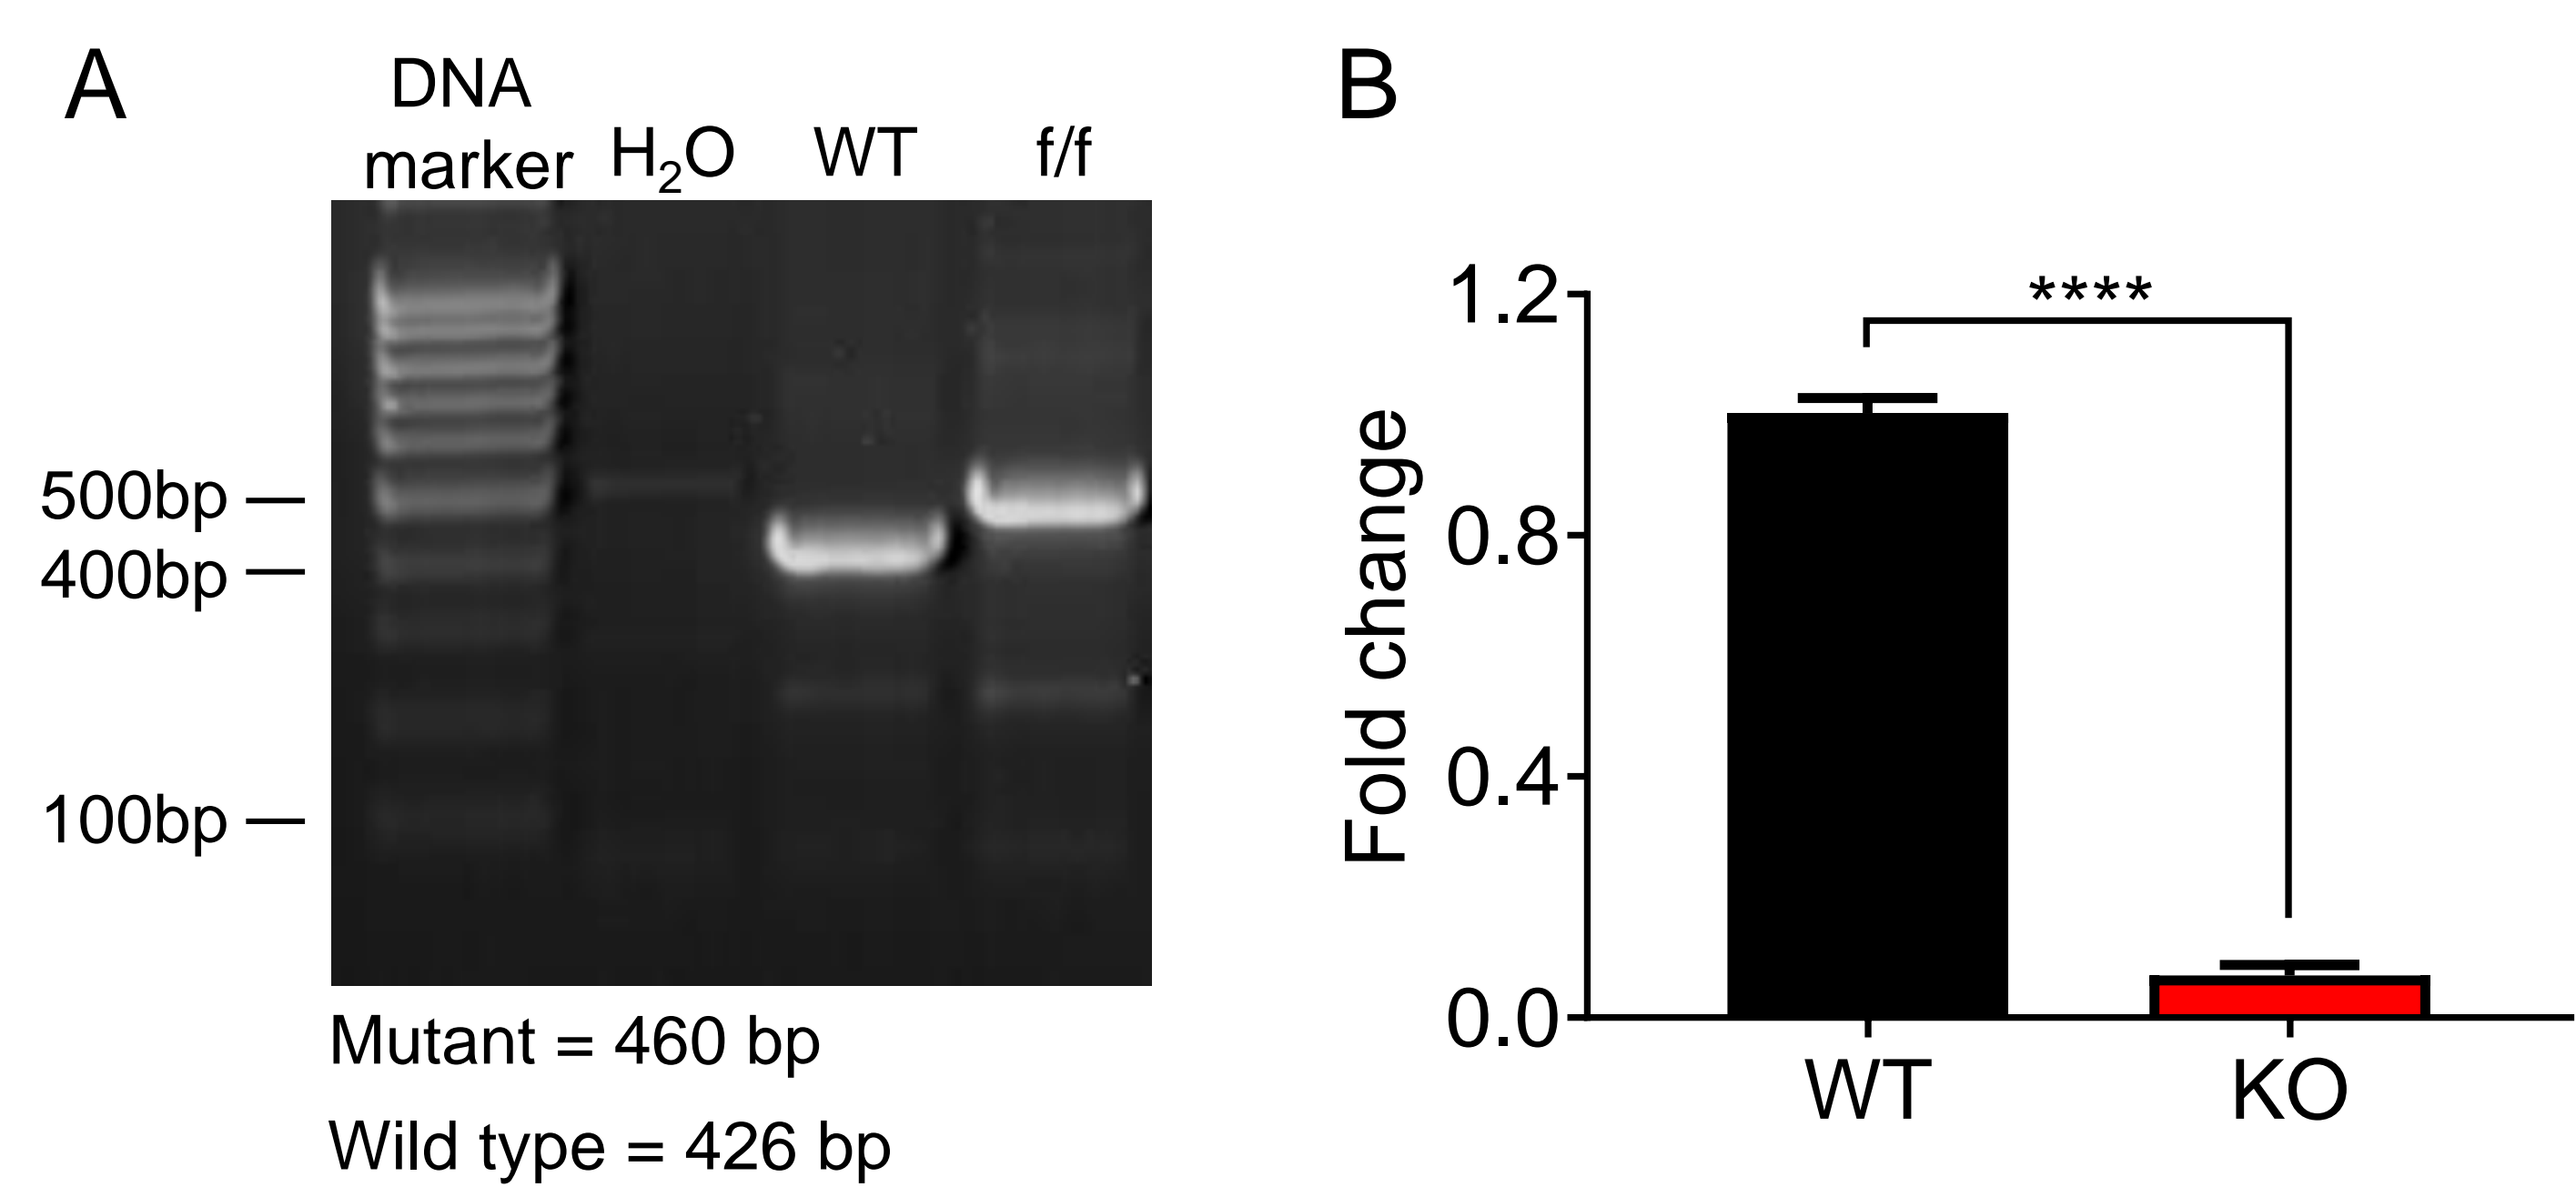

Supplement: supp [file elife-75508-supp-v1.zip]

Figure 6—figure supplement 2

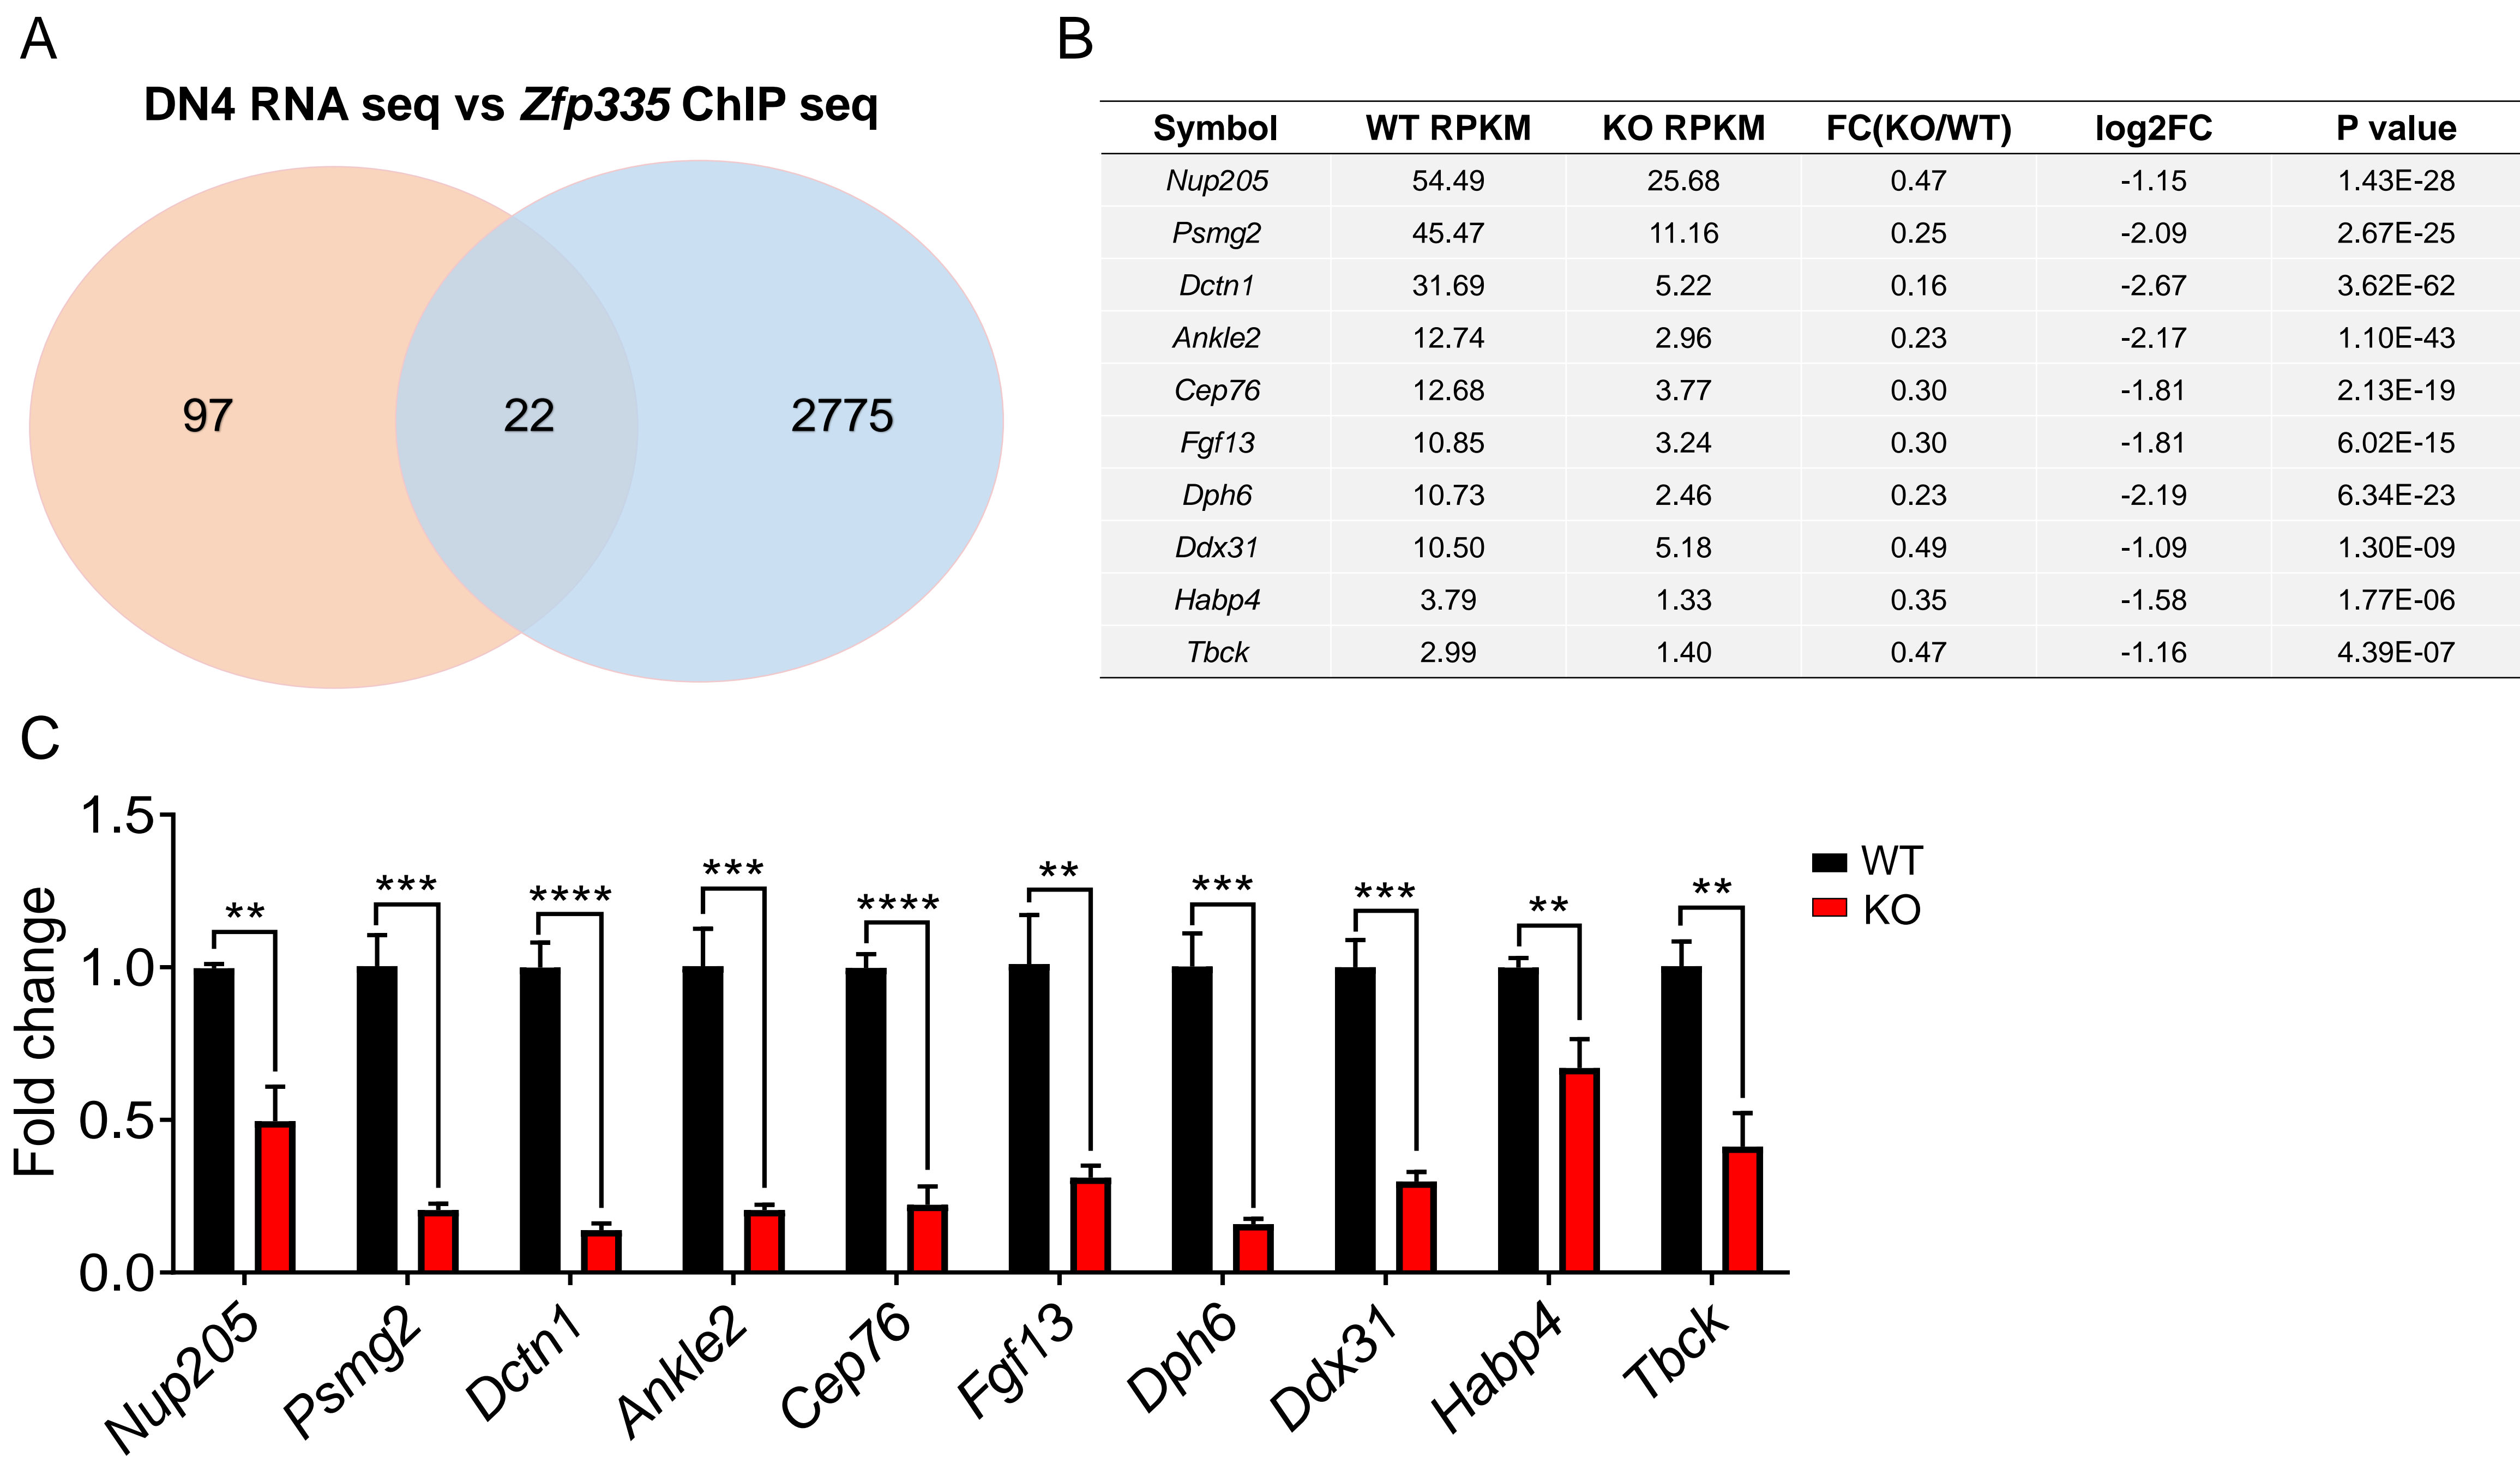

Supplement: supp [file elife-75508-supp-v1.zip]

Figure 4—figure supplement 1

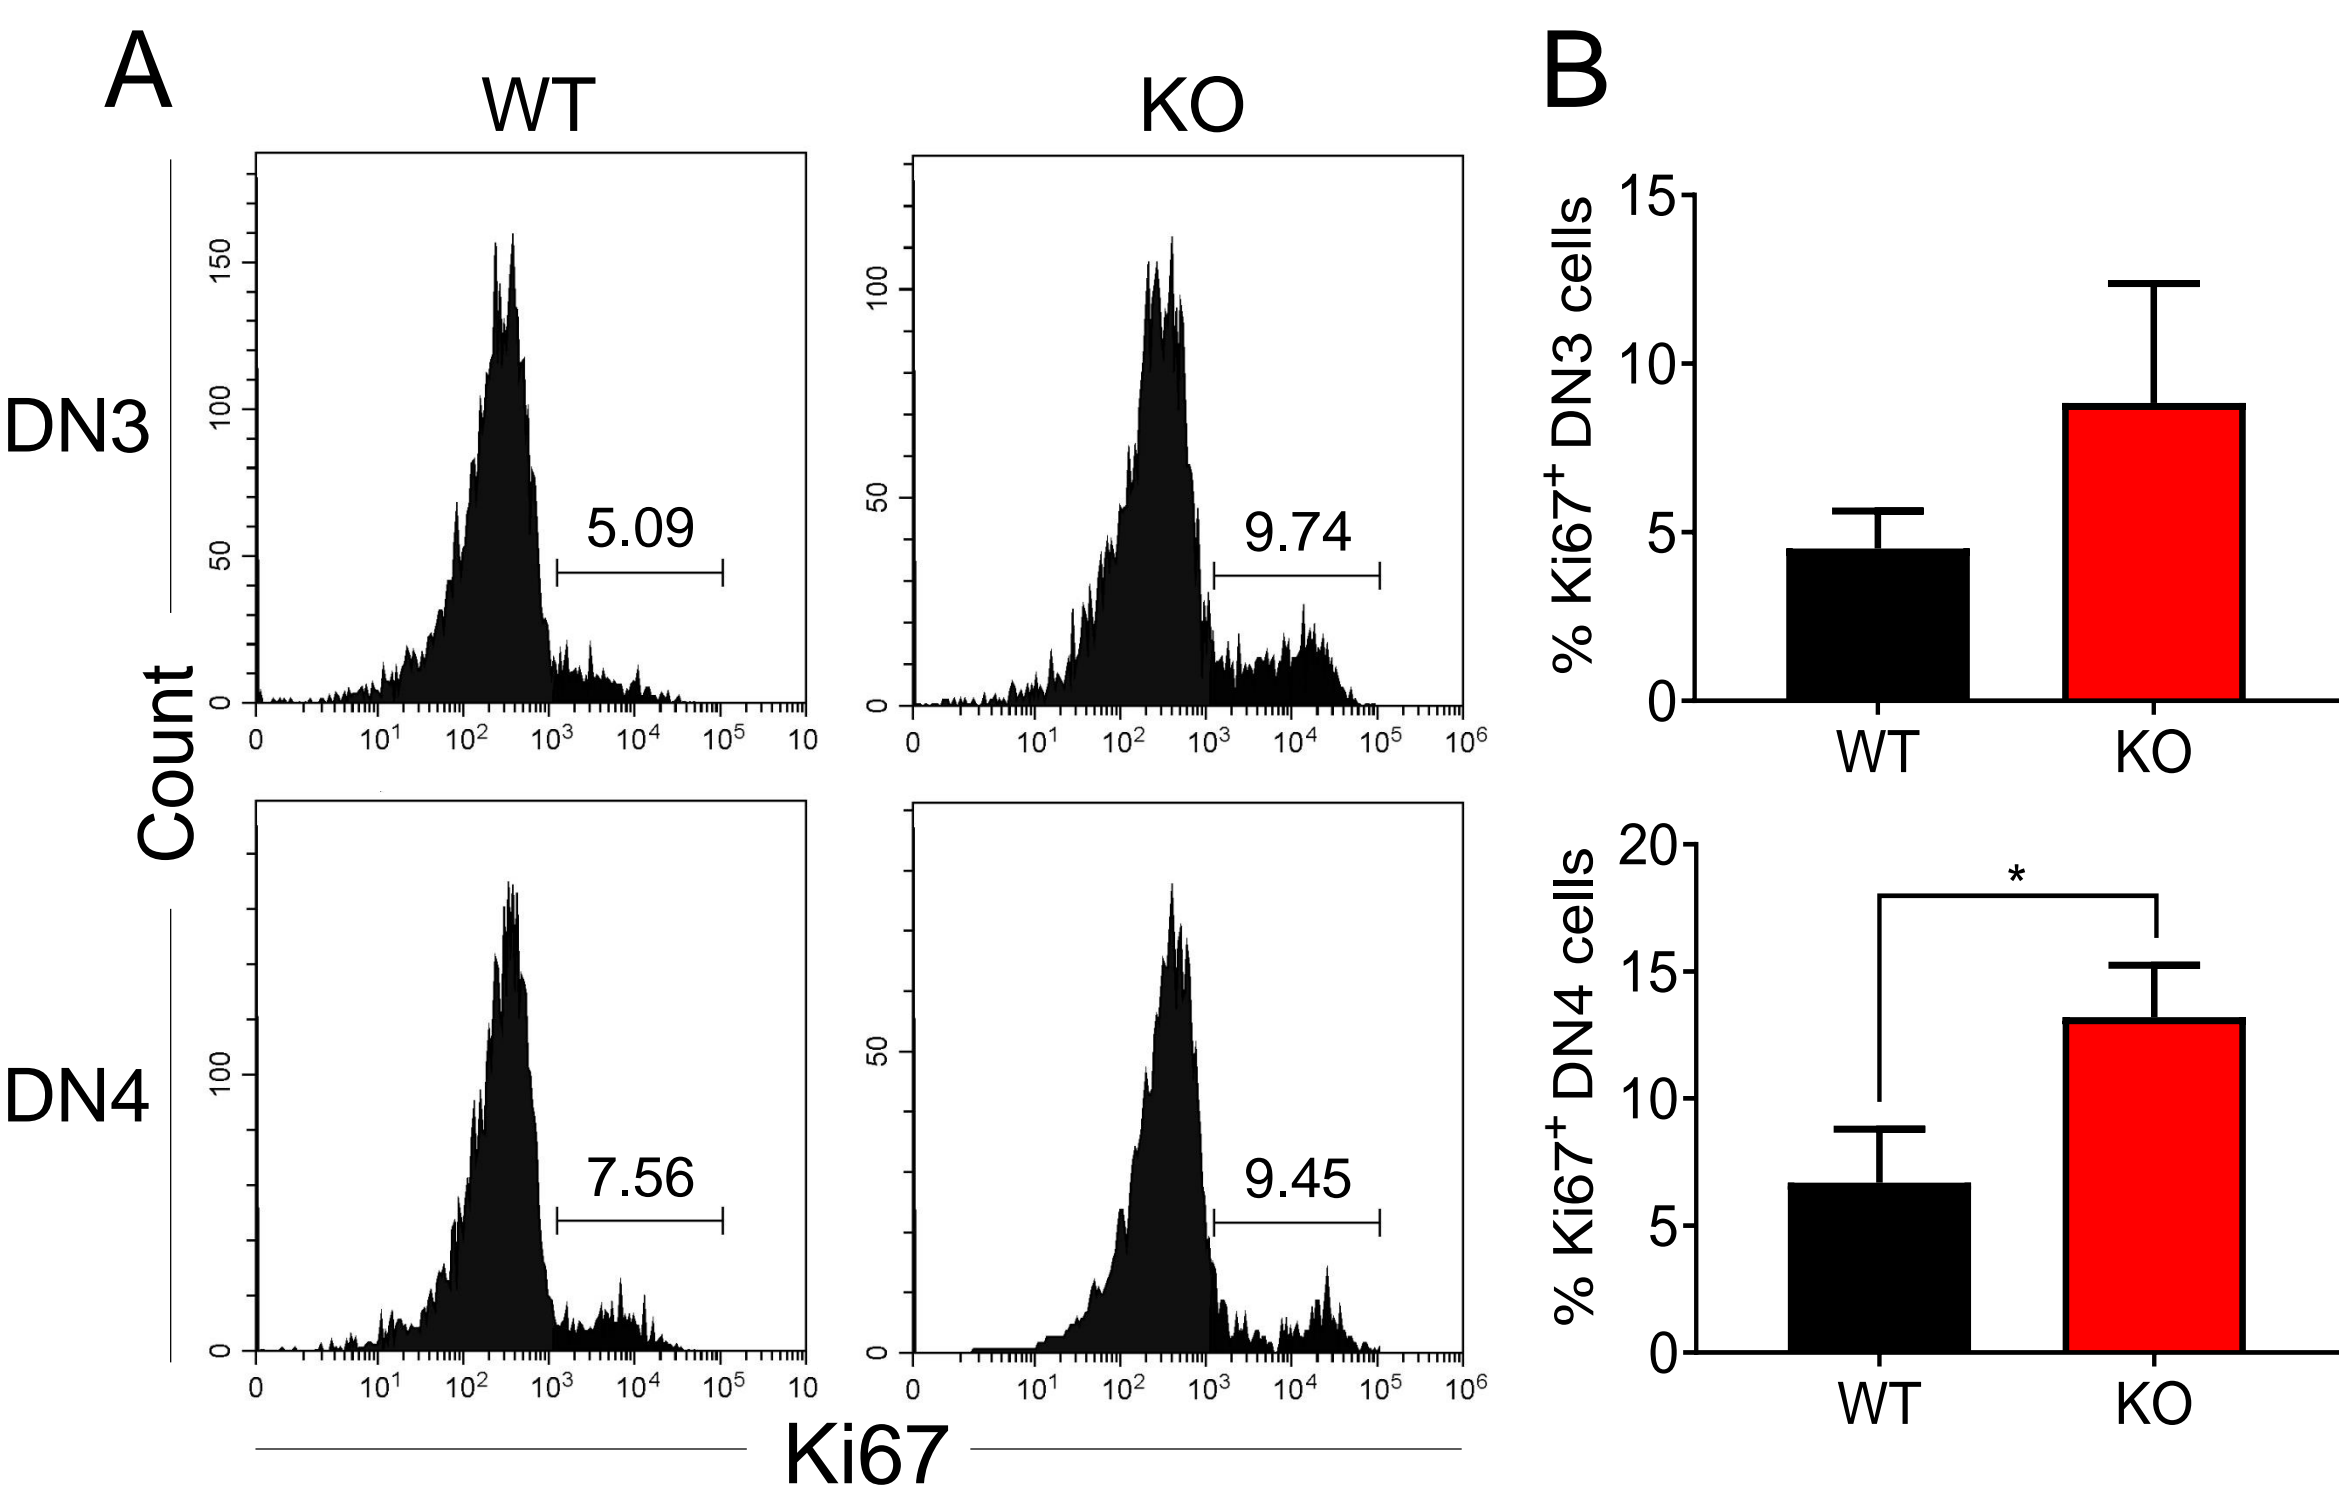

Supplement: supp [file elife-75508-supp-v1.zip]

Figure 7—figure supplement 1

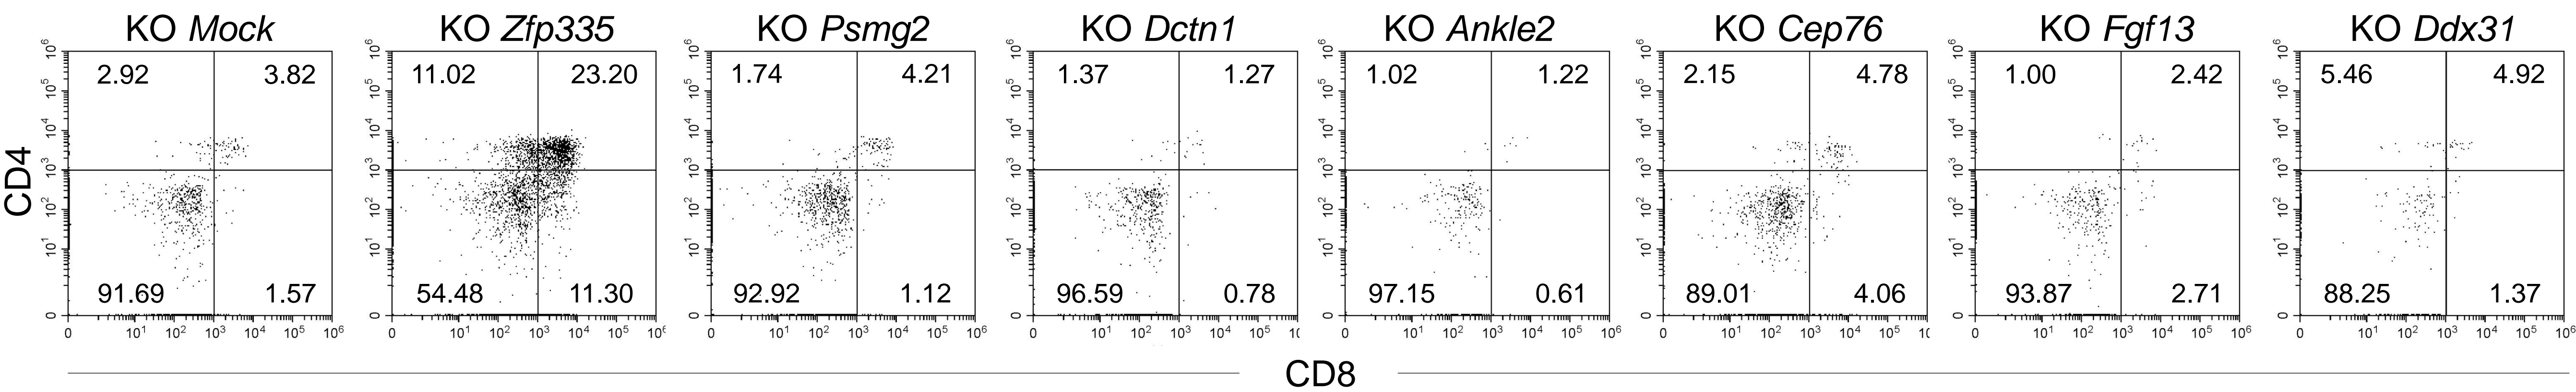

Supplement: supp [file elife-75508-supp-v1.zip]

Figure 4—figure supplement 2

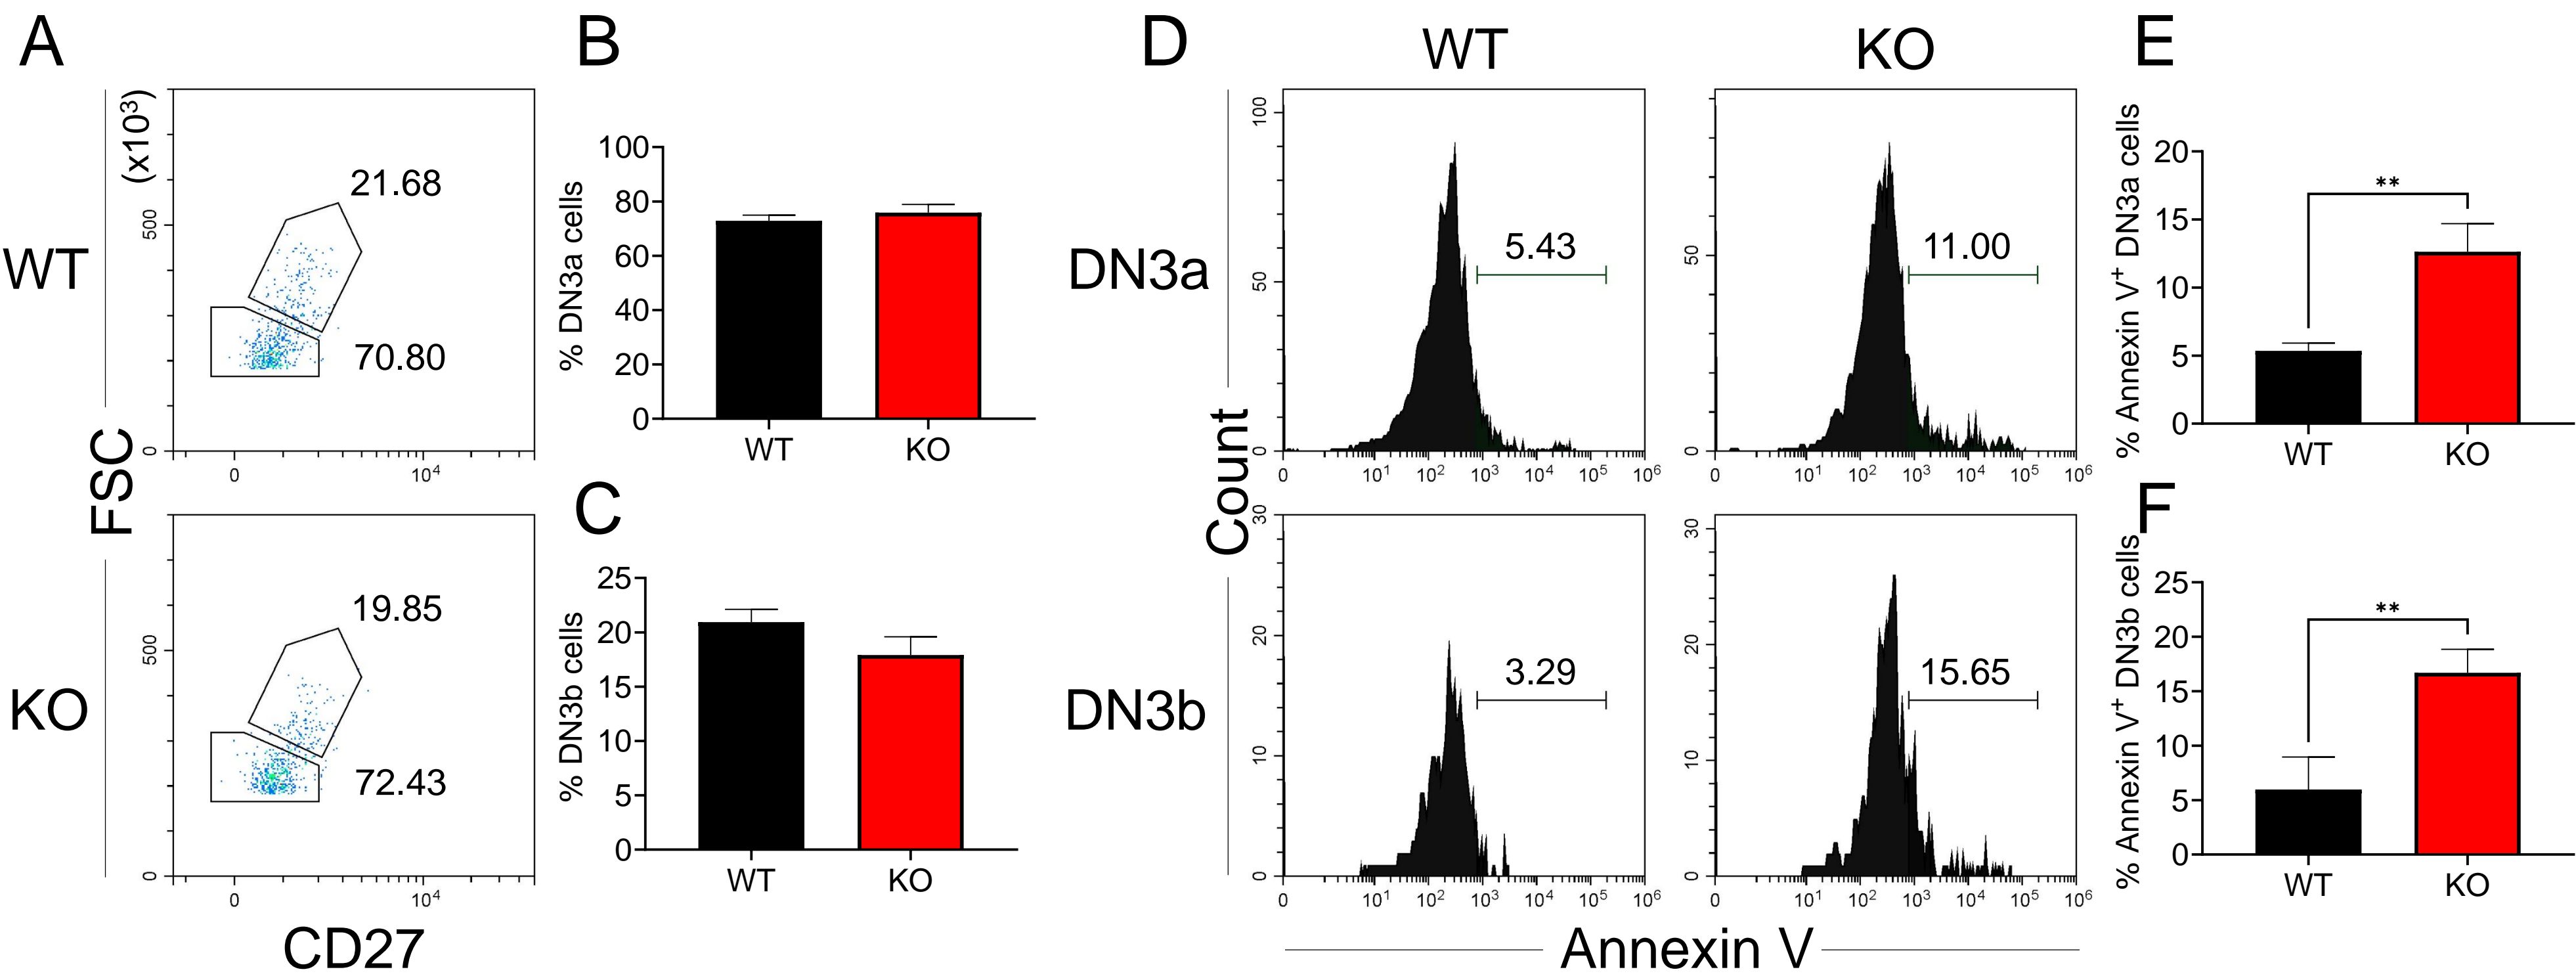

Supplement: supp [file elife-75508-supp-v1.zip]

Figure 2—figure supplement 1

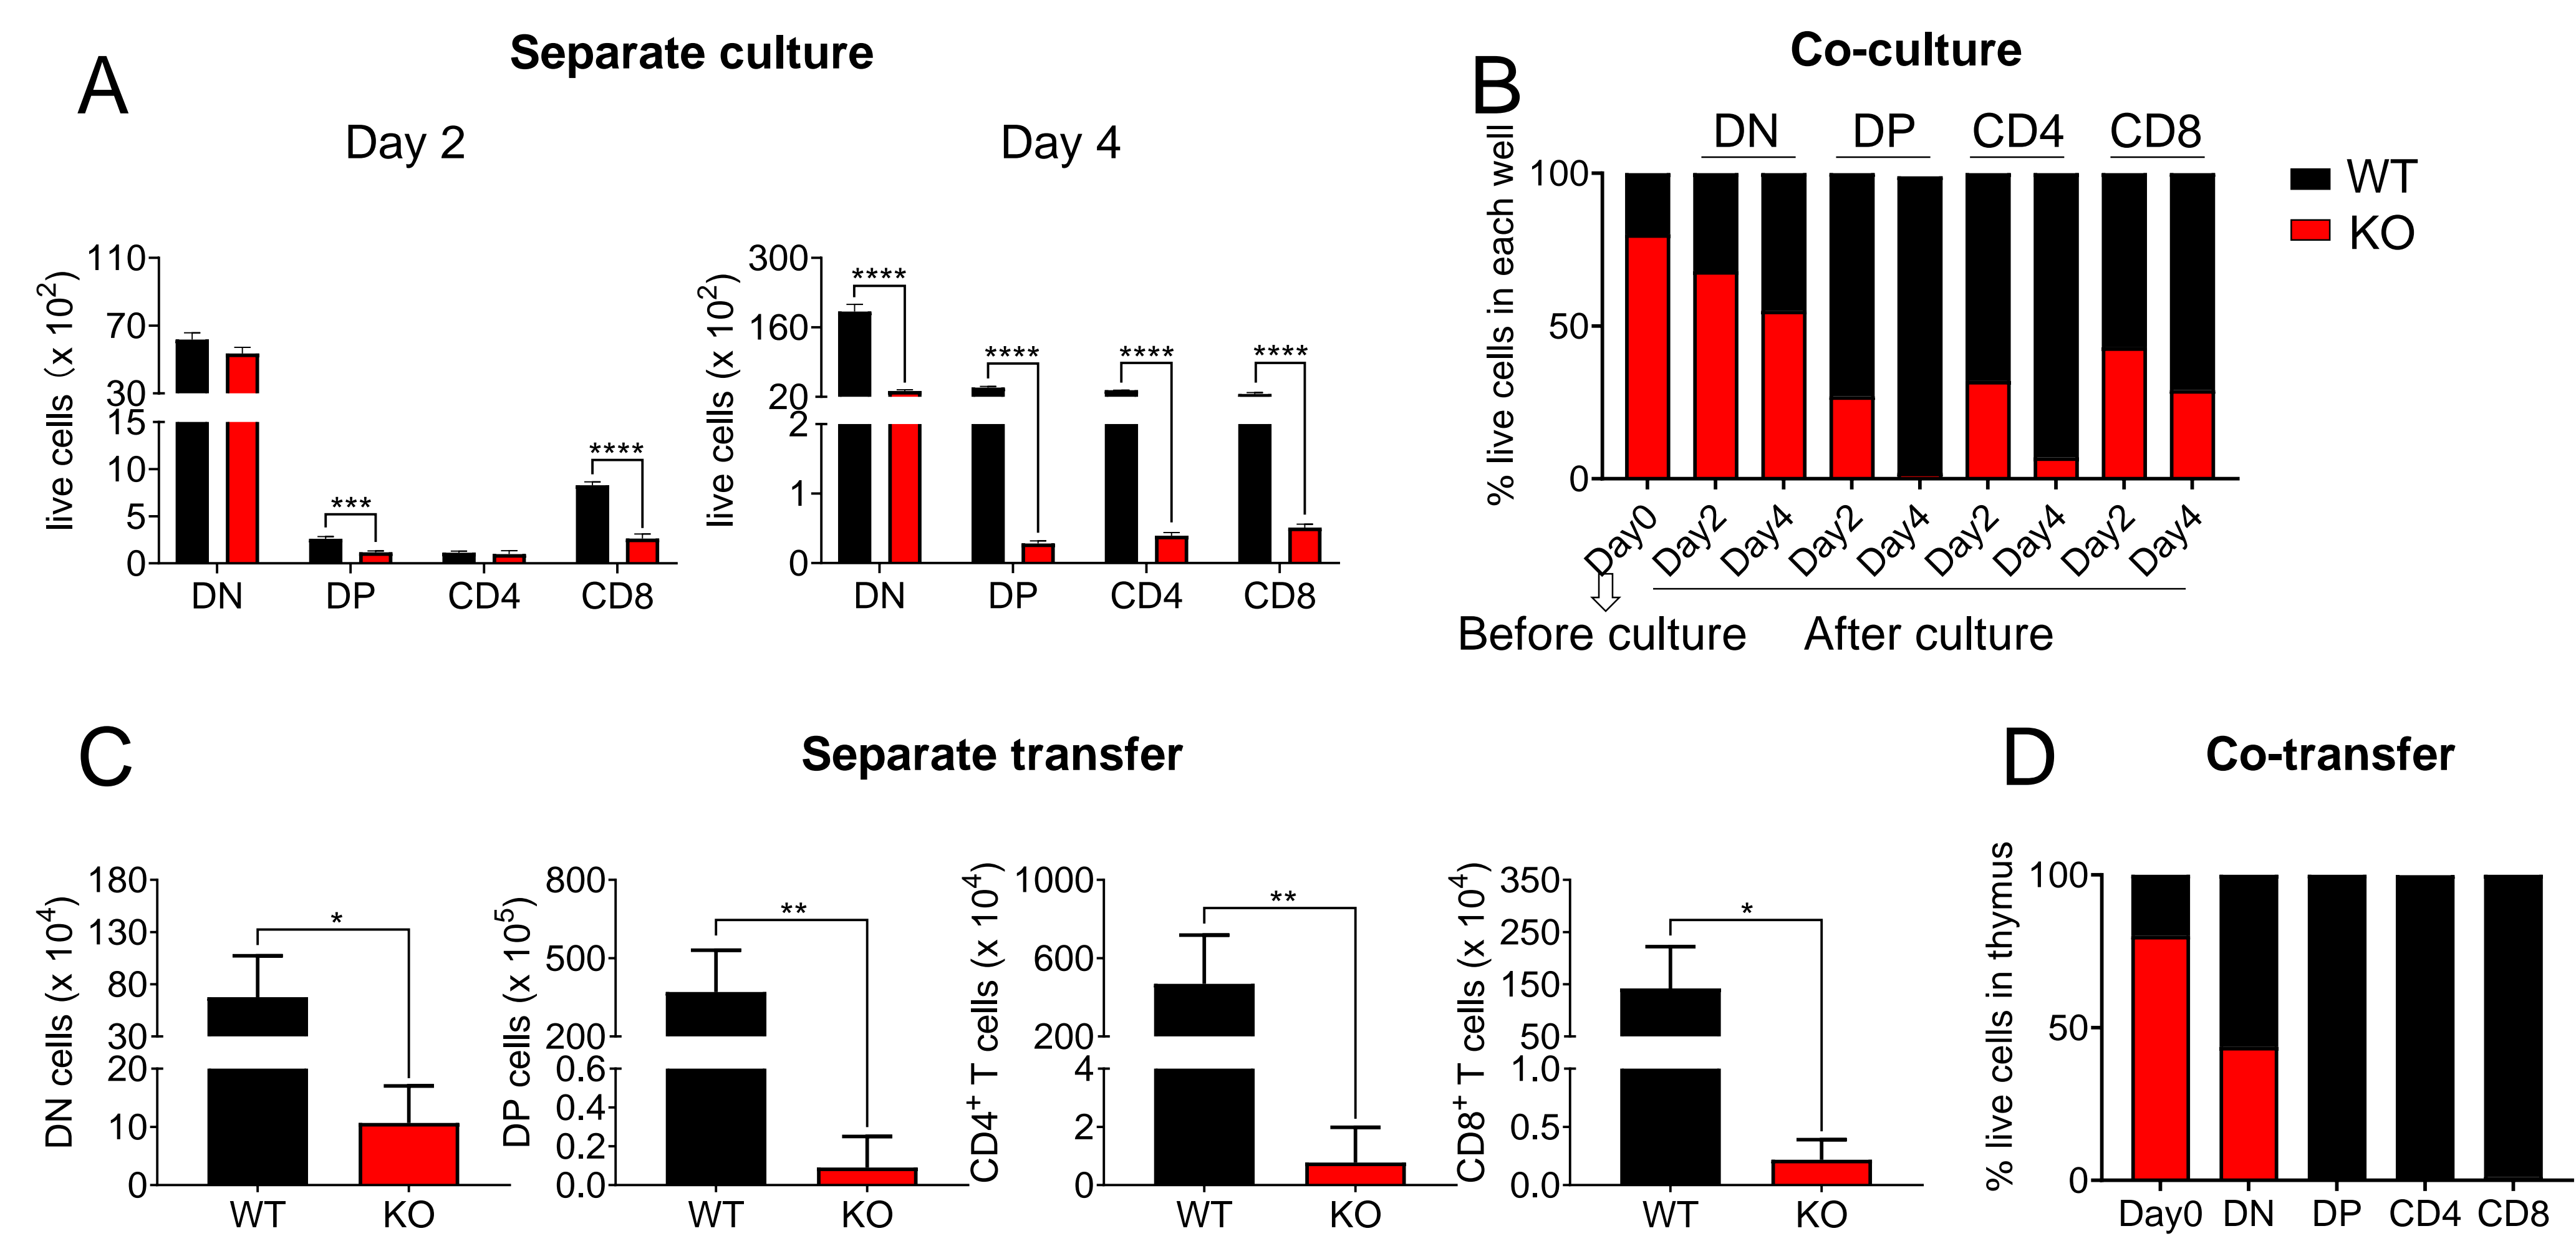

Supplement: supp [file elife-75508-supp-v1.zip]

Figure 5—figure supplement 1

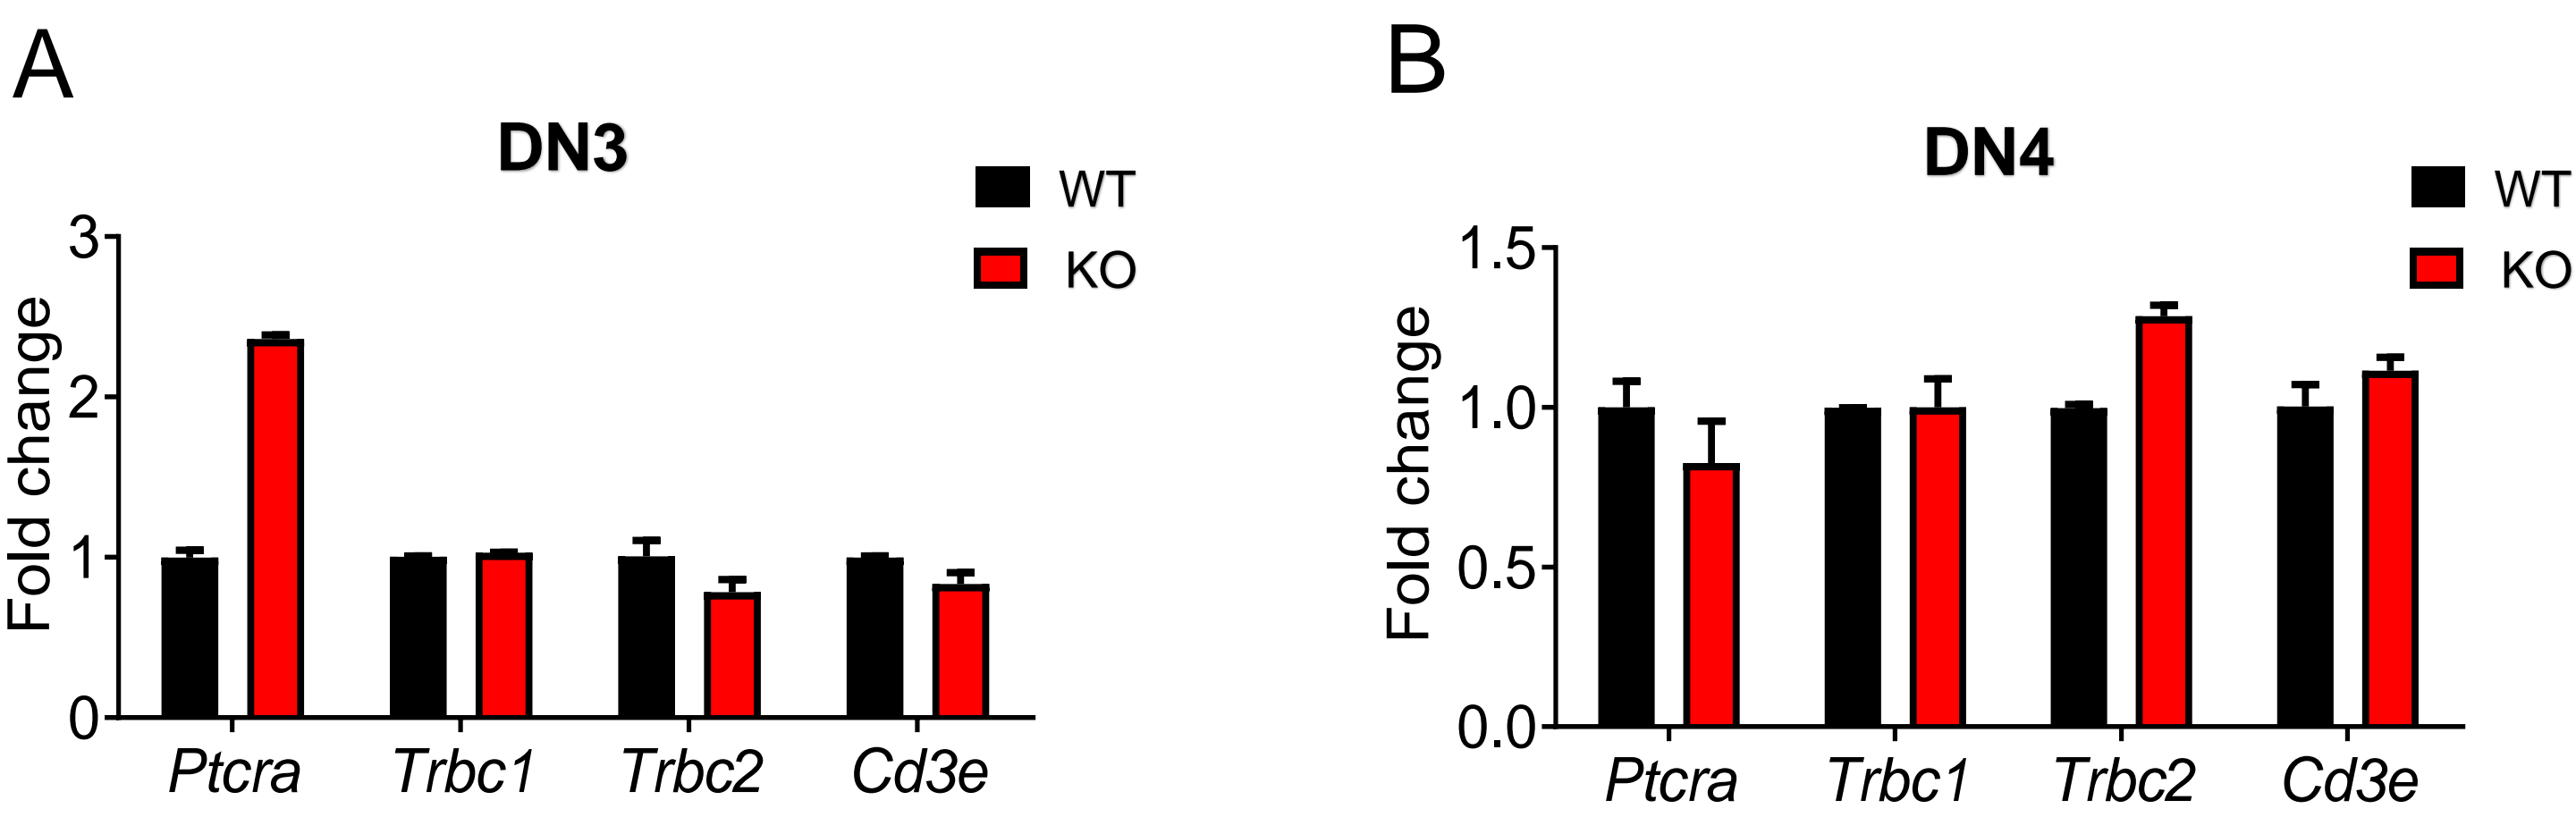

Supplement: supp [file elife-75508-supp-v1.zip]

Figure 7—figure supplement 2

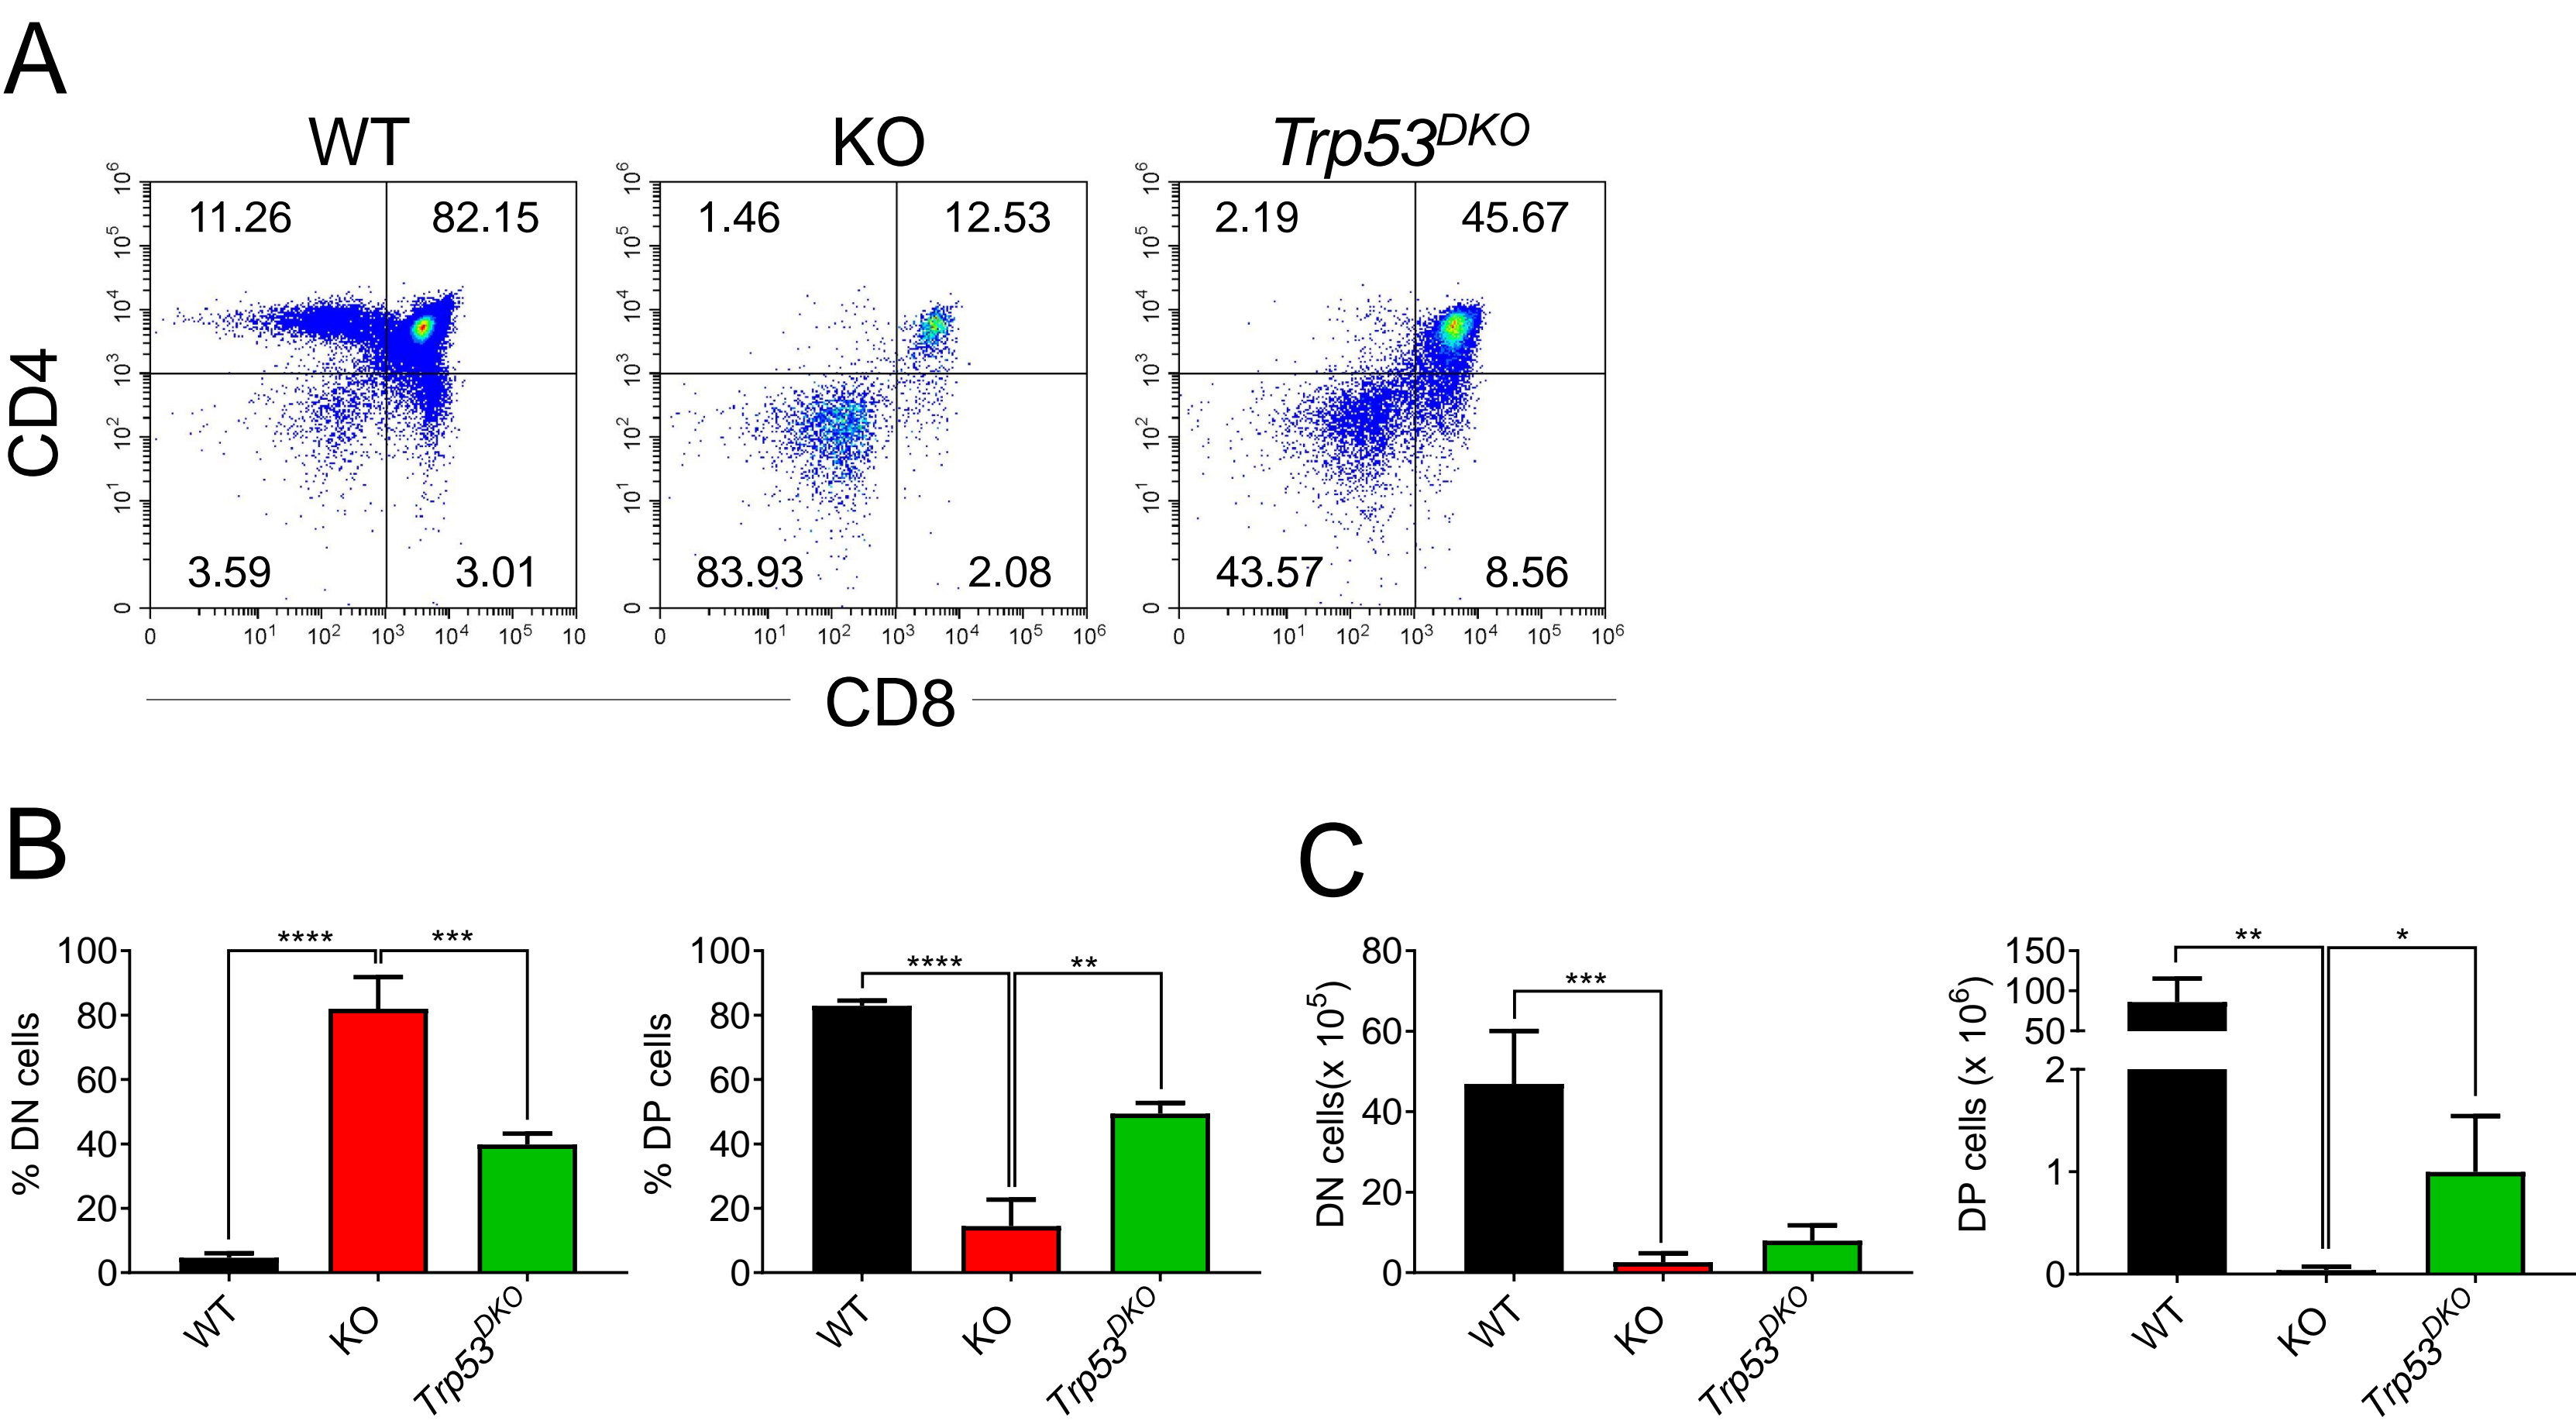

Supplement: supp [file elife-75508-supp-v1.zip]

Figure 1—figure supplement 2

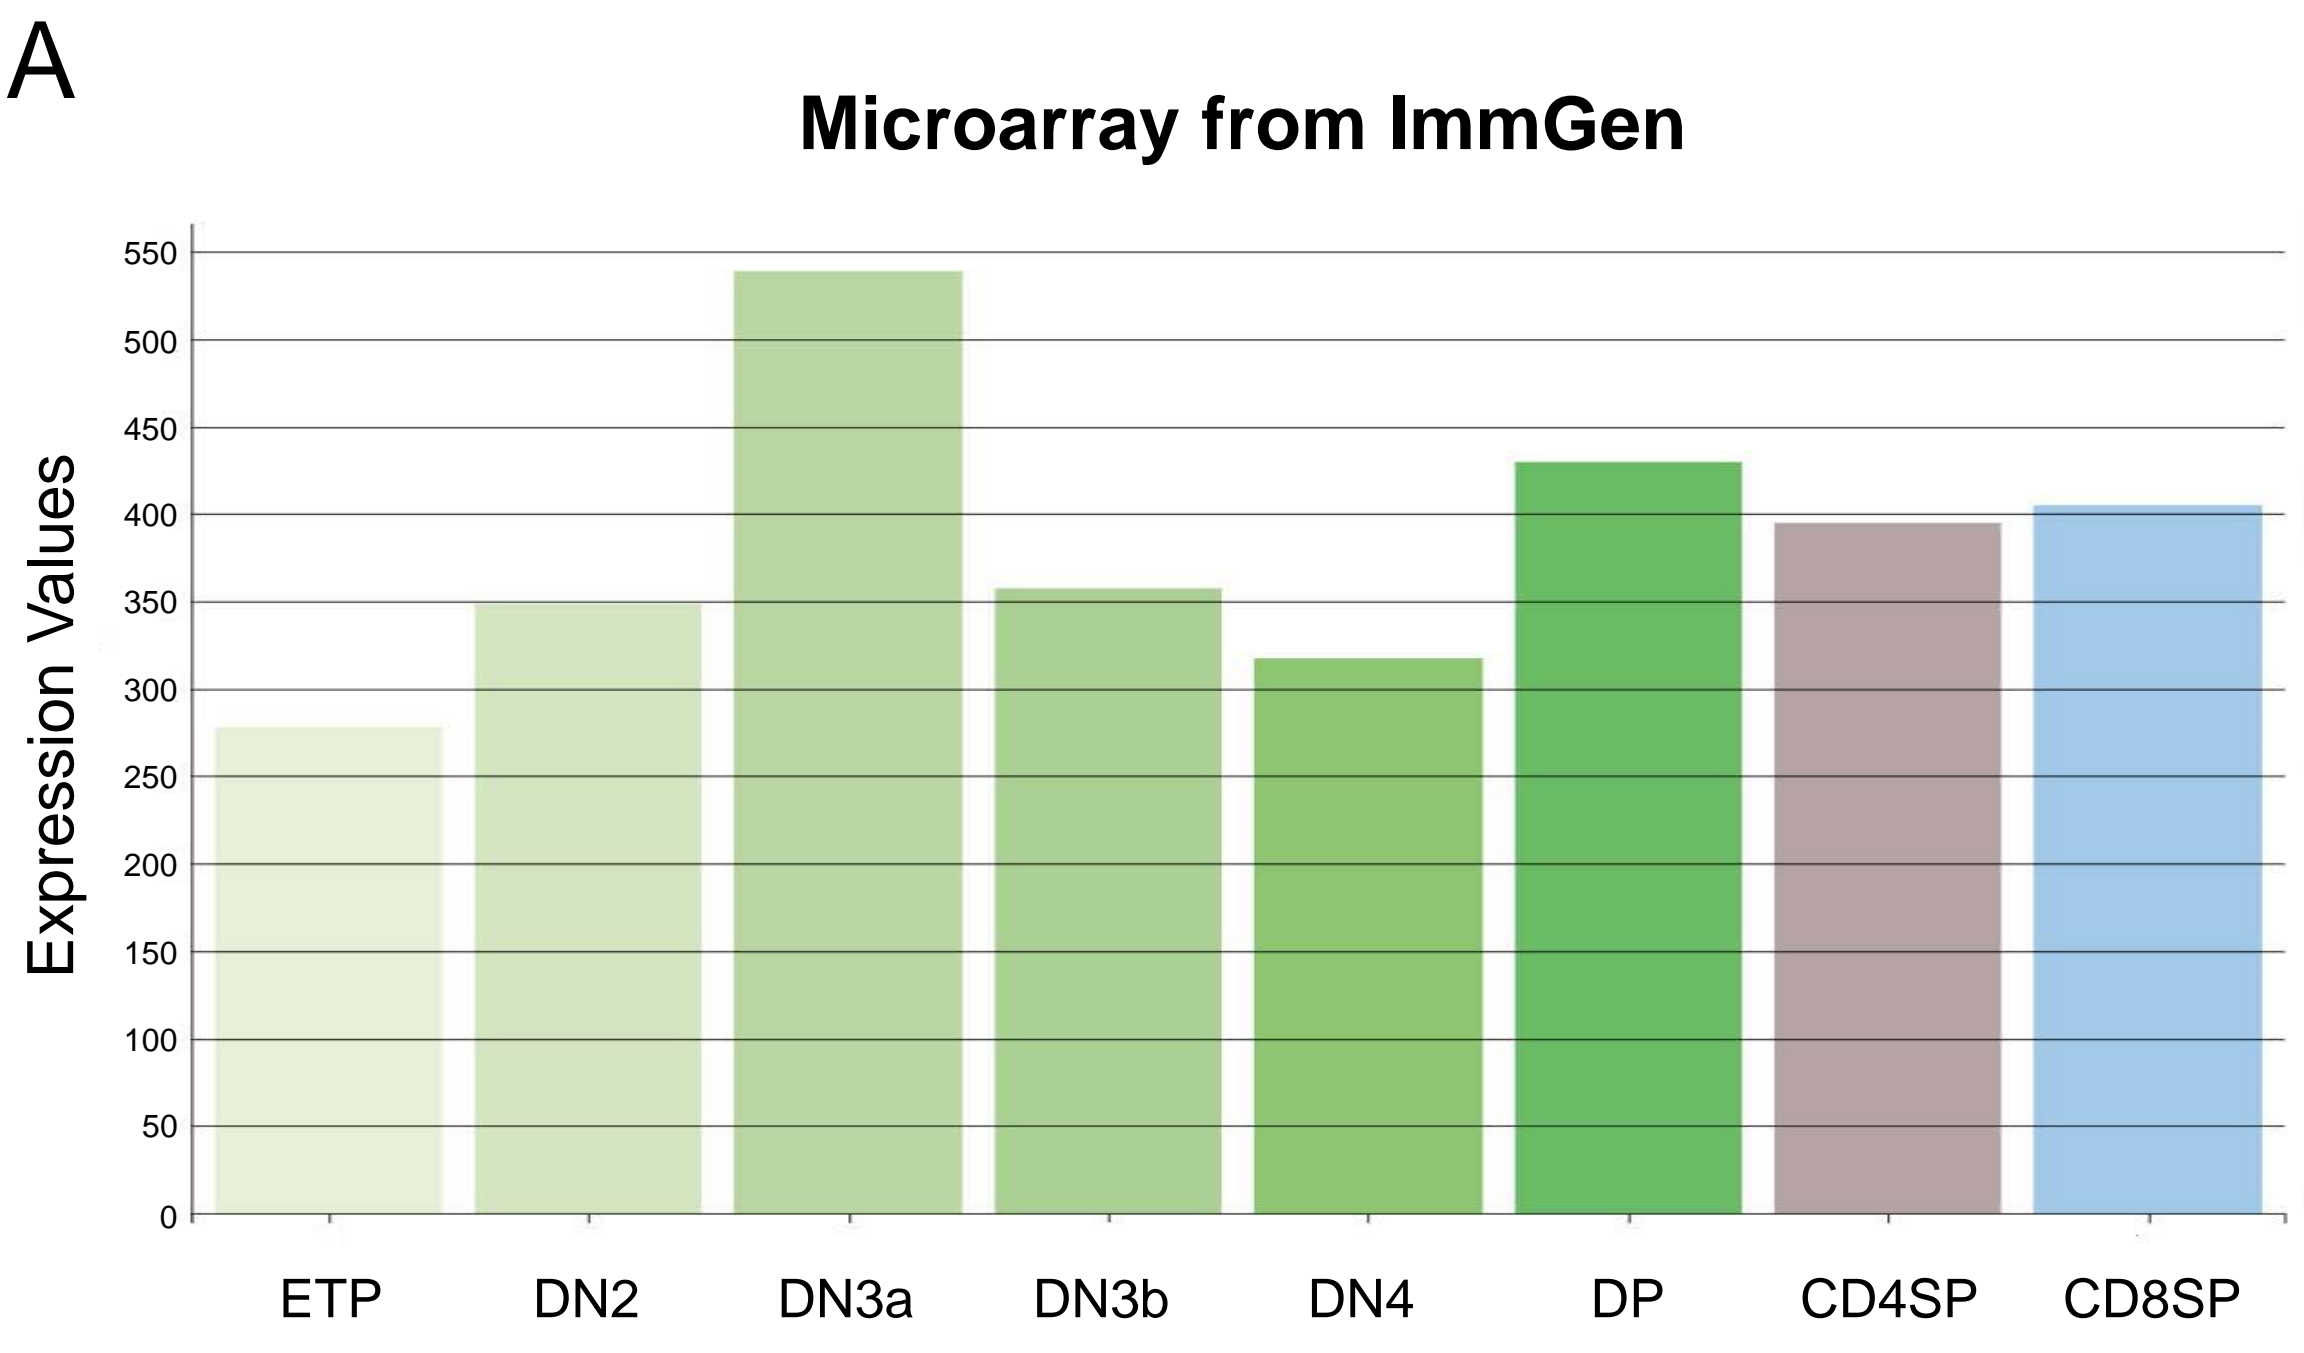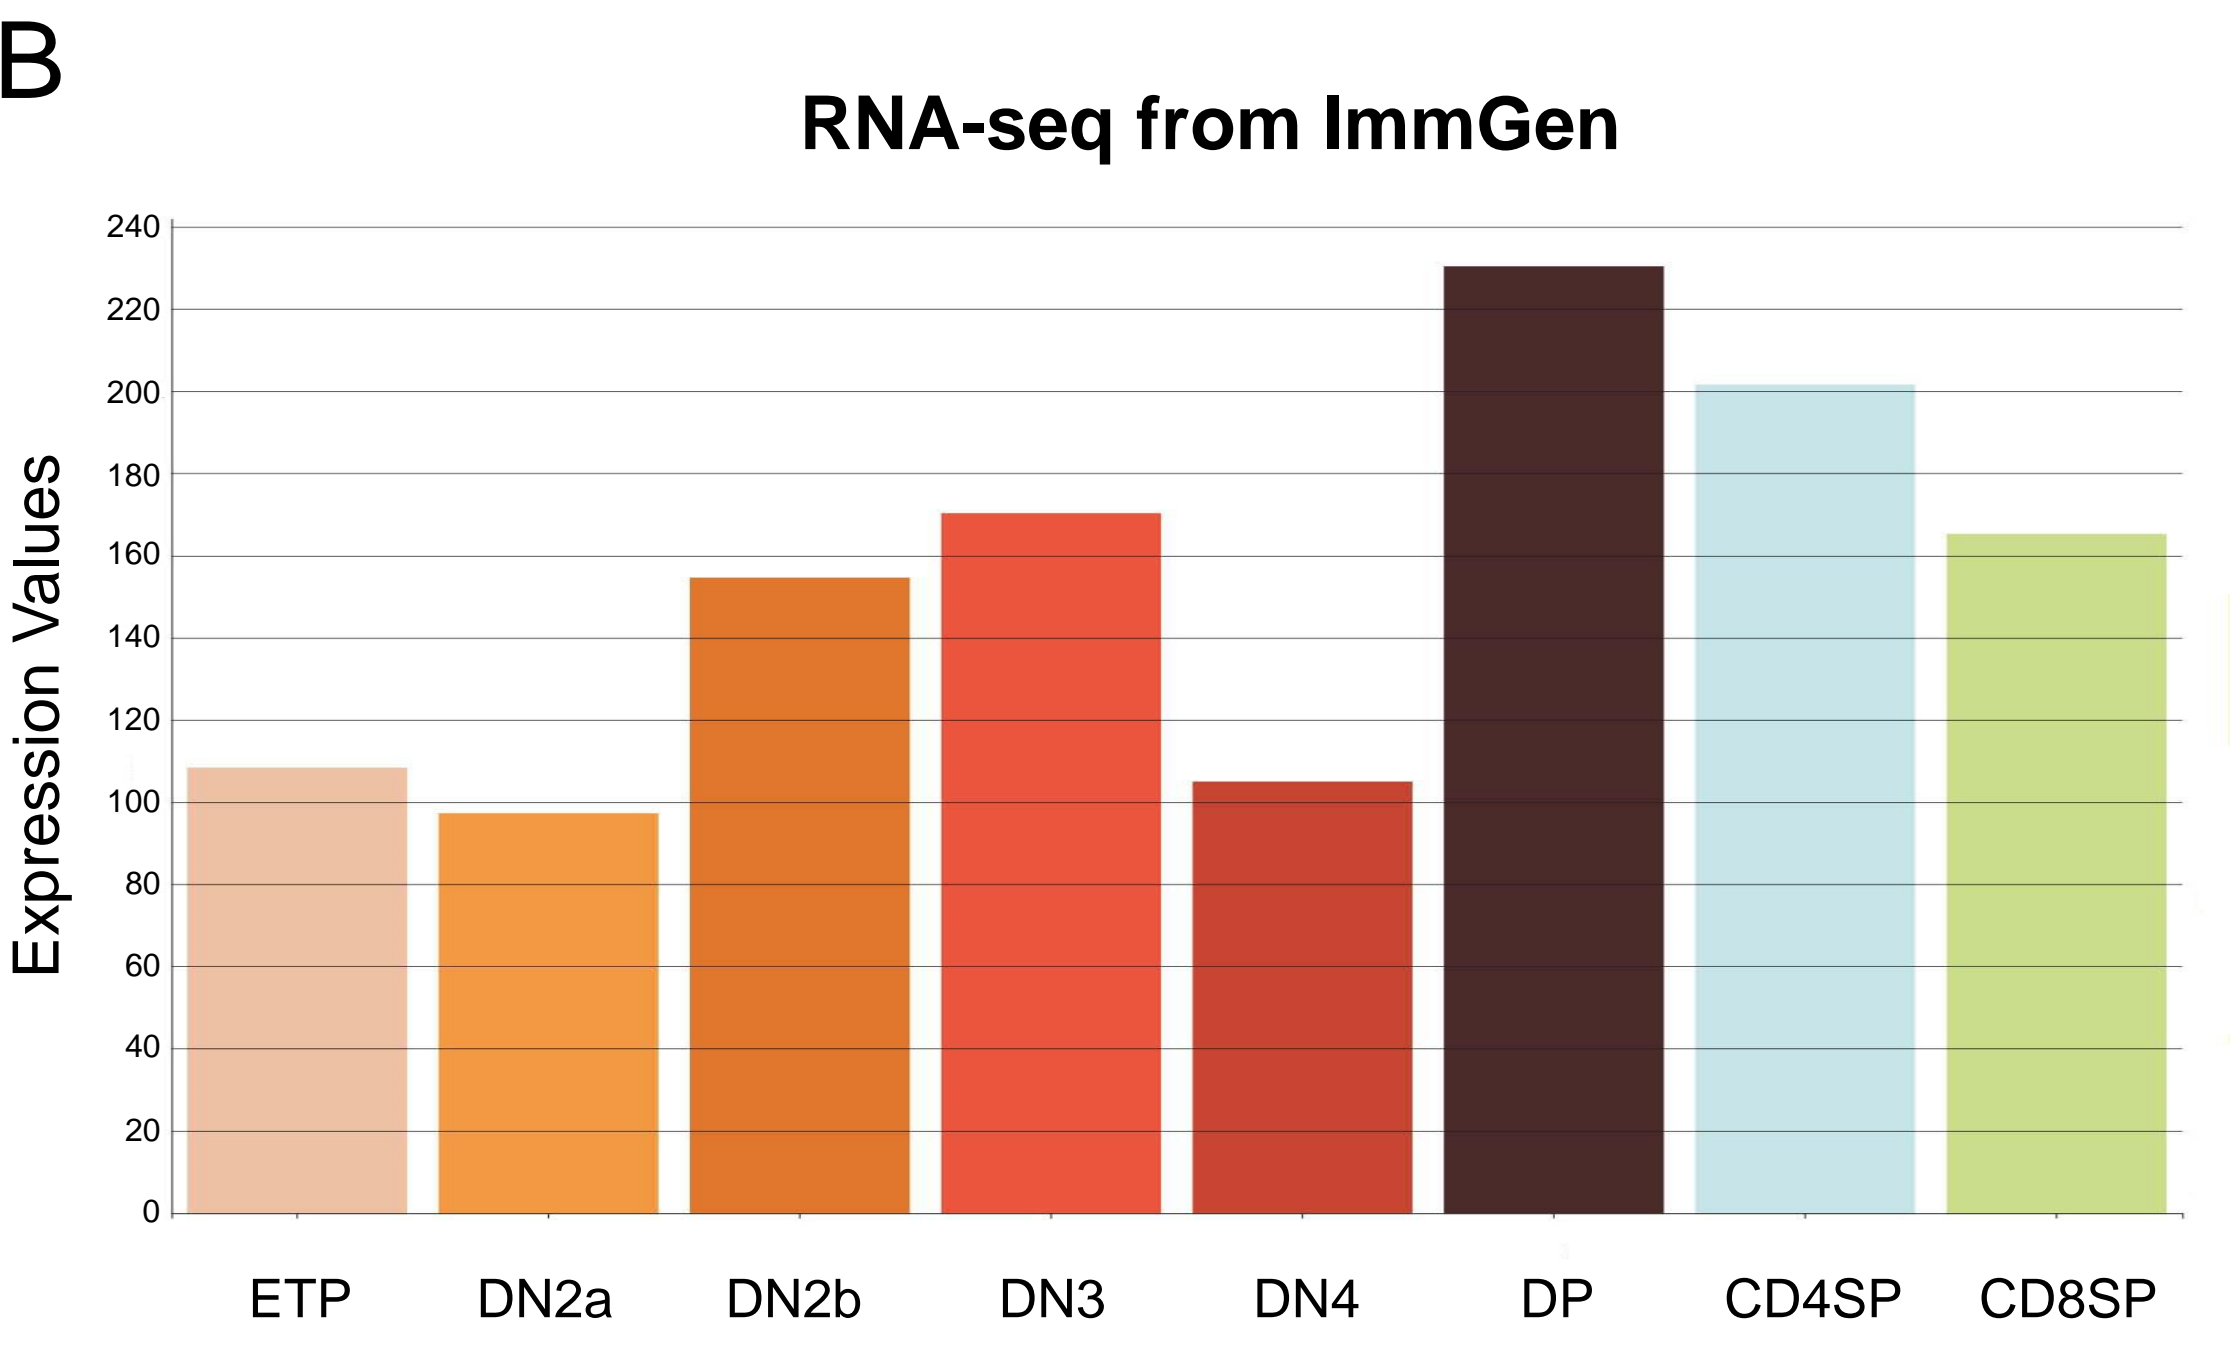

Supplement: supp [file elife-75508-supp-v1.zip]

Figure 5—figure supplement 3

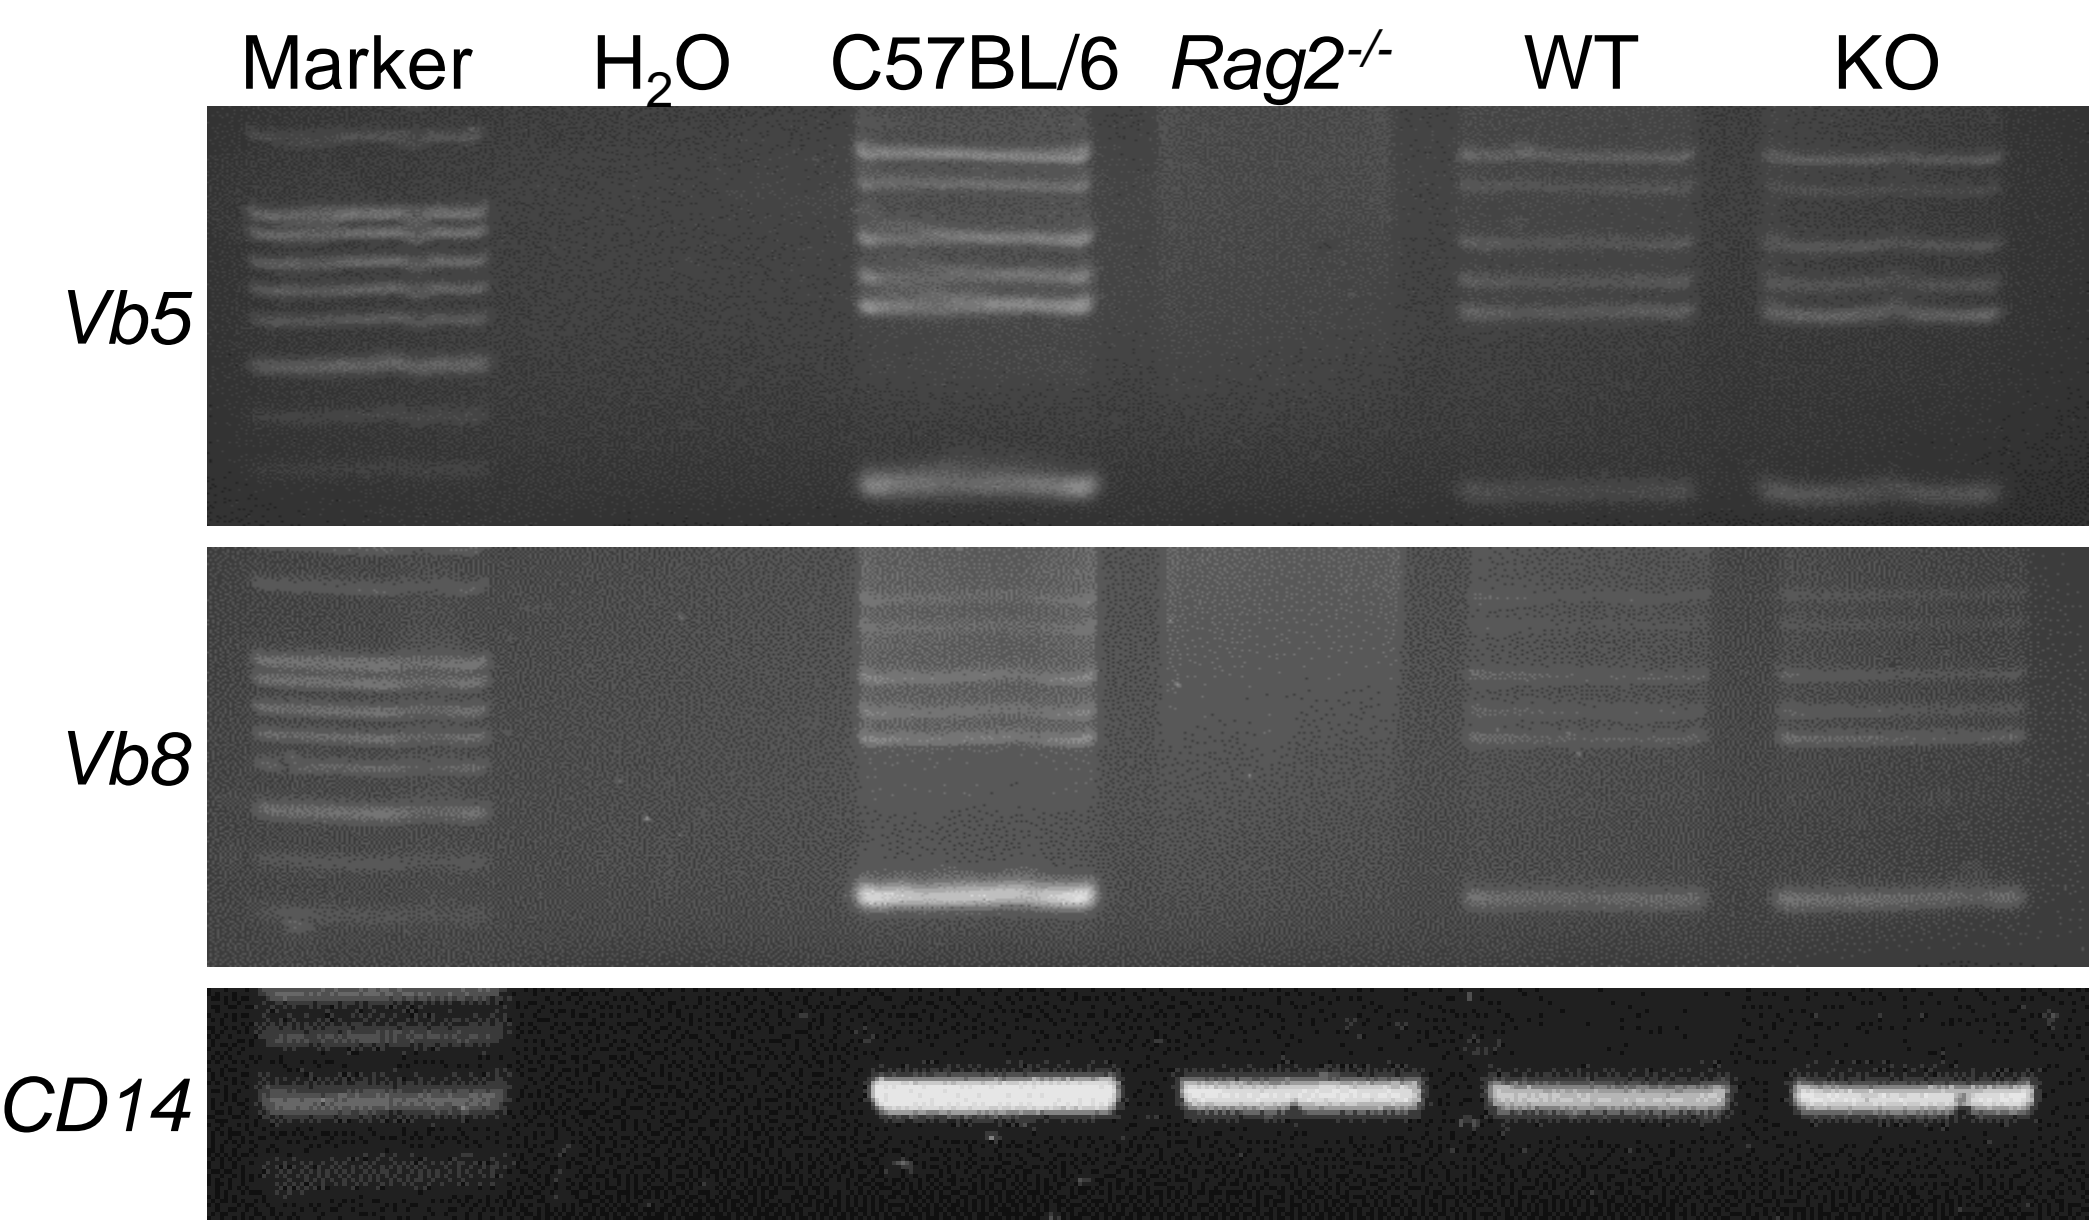

Supplement: supp [file elife-75508-supp-v1.zip]

Figure 5—figure supplement 2

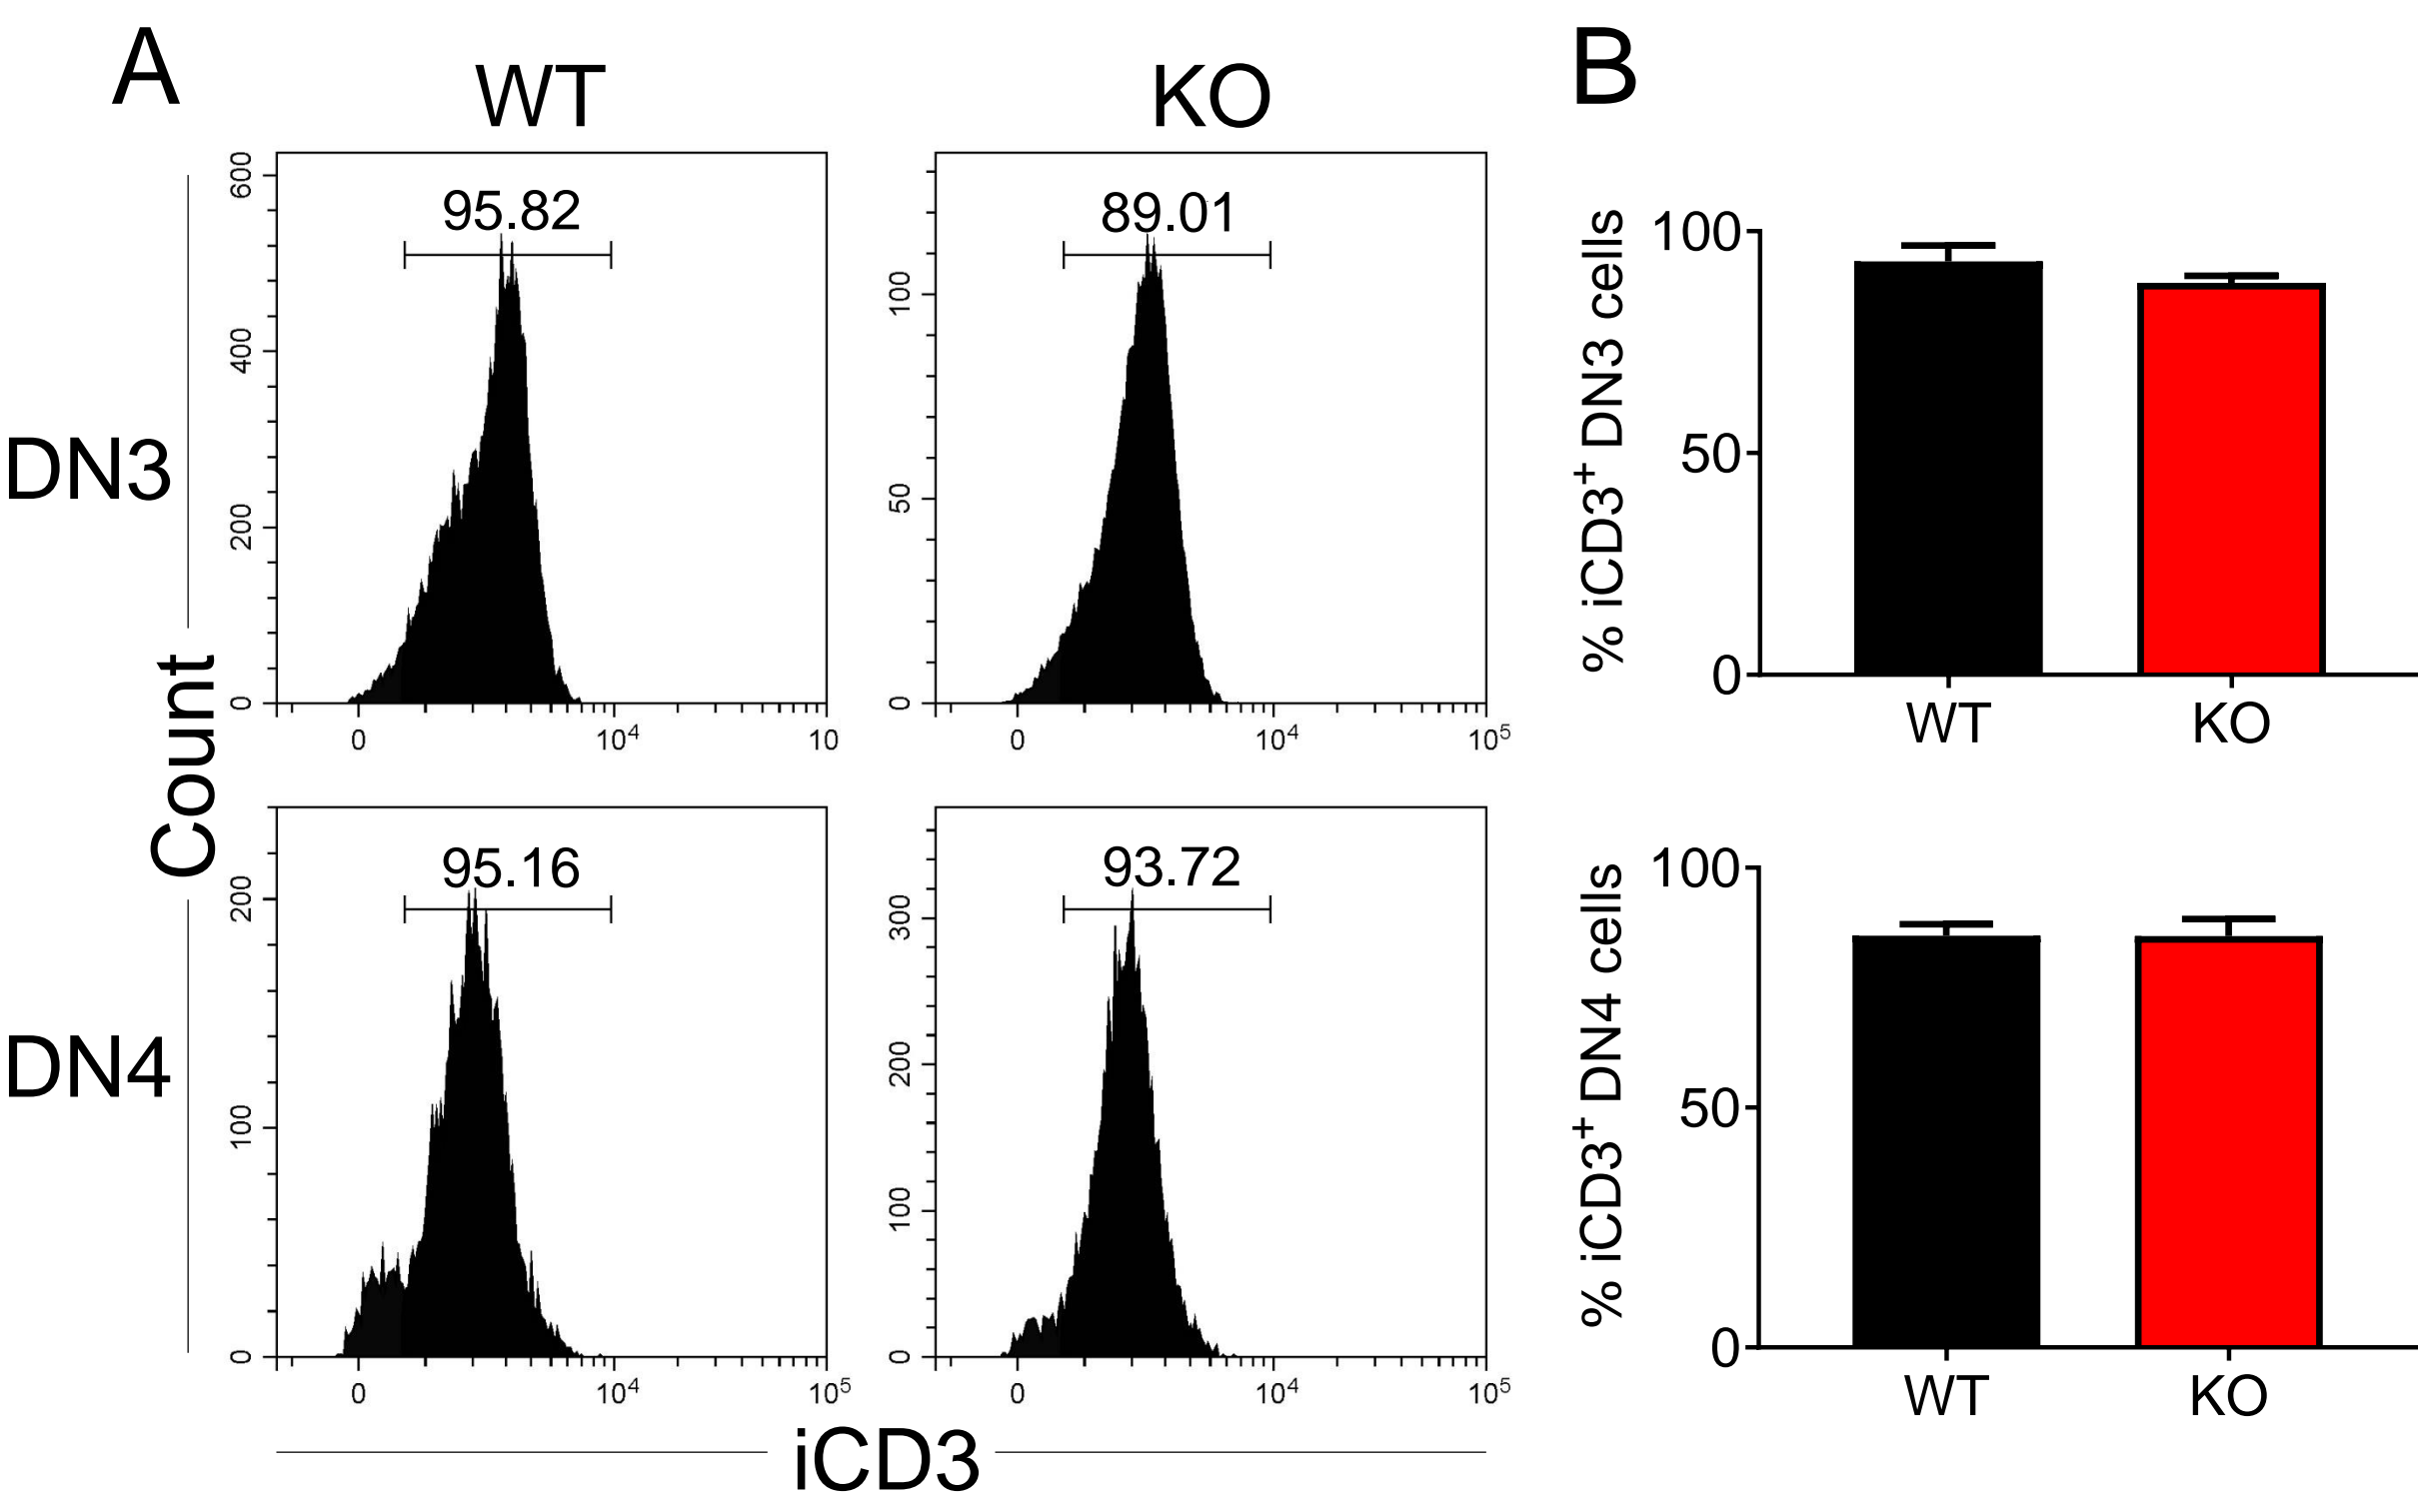

Supplement: supp [file elife-75508-supp-v1.zip]
